# Supplementary material for: A graph neural network model to estimate cell-wise metabolic flux using single-cell RNA-seq data
Source: PubMed Central journal article supplement — Genome Res. 2021 Oct;31(10):1867–84. doi: 10.1101/gr.271205.120 (PMC8494226; doi:10.1101/gr.271205.120), 2021-10
Supplement: supp_gr.271205.120_Supplementary_Figure_S1.pdf [file supp_gr.271205.120_Supplementary_Figure_S1.pdf]

Supplementary Figure S1

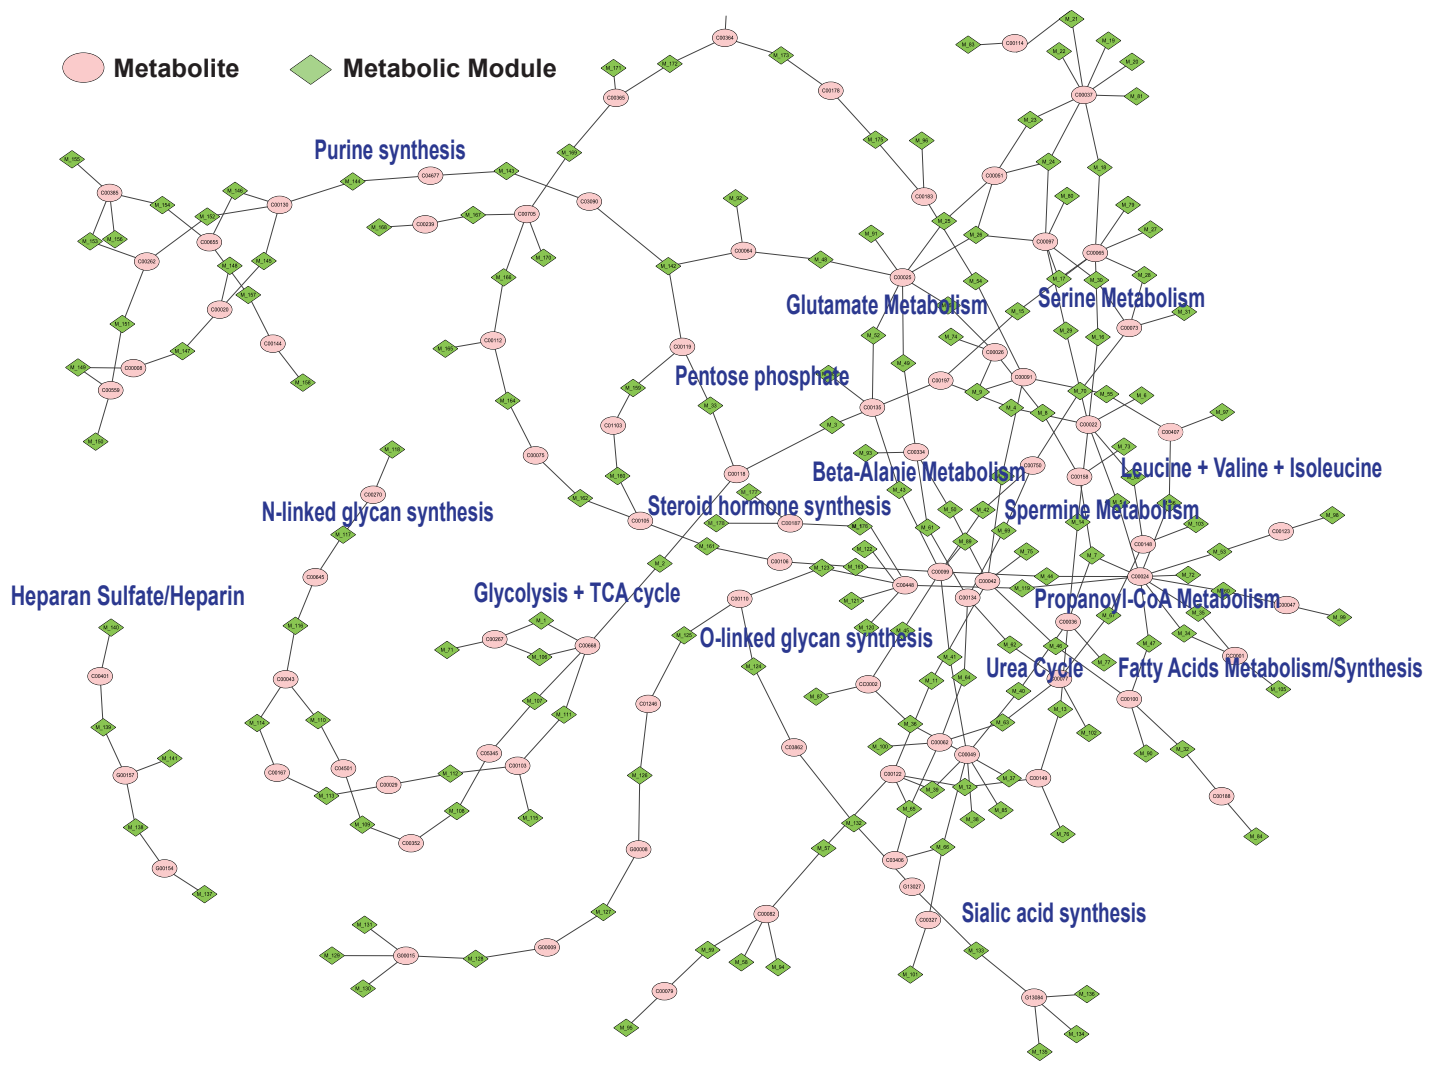

Supplementary Figure S1. Factor graph representation of the reconstructed human metabolic map, in which the modules and metabolites were colored by green and pink, respectively.
