# Supplementary material for: A graph neural network model to estimate cell-wise metabolic flux using single-cell RNA-seq data
Source: PubMed Central journal article supplement — Genome Res. 2021 Oct;31(10):1867–84. doi: 10.1101/gr.271205.120 (PMC8494226; doi:10.1101/gr.271205.120), 2021-10
Supplement: supp_gr.271205.120_Supplementary_Figure_S3.pdf [file supp_gr.271205.120_Supplementary_Figure_S3.pdf]

Supplementary Figure S3

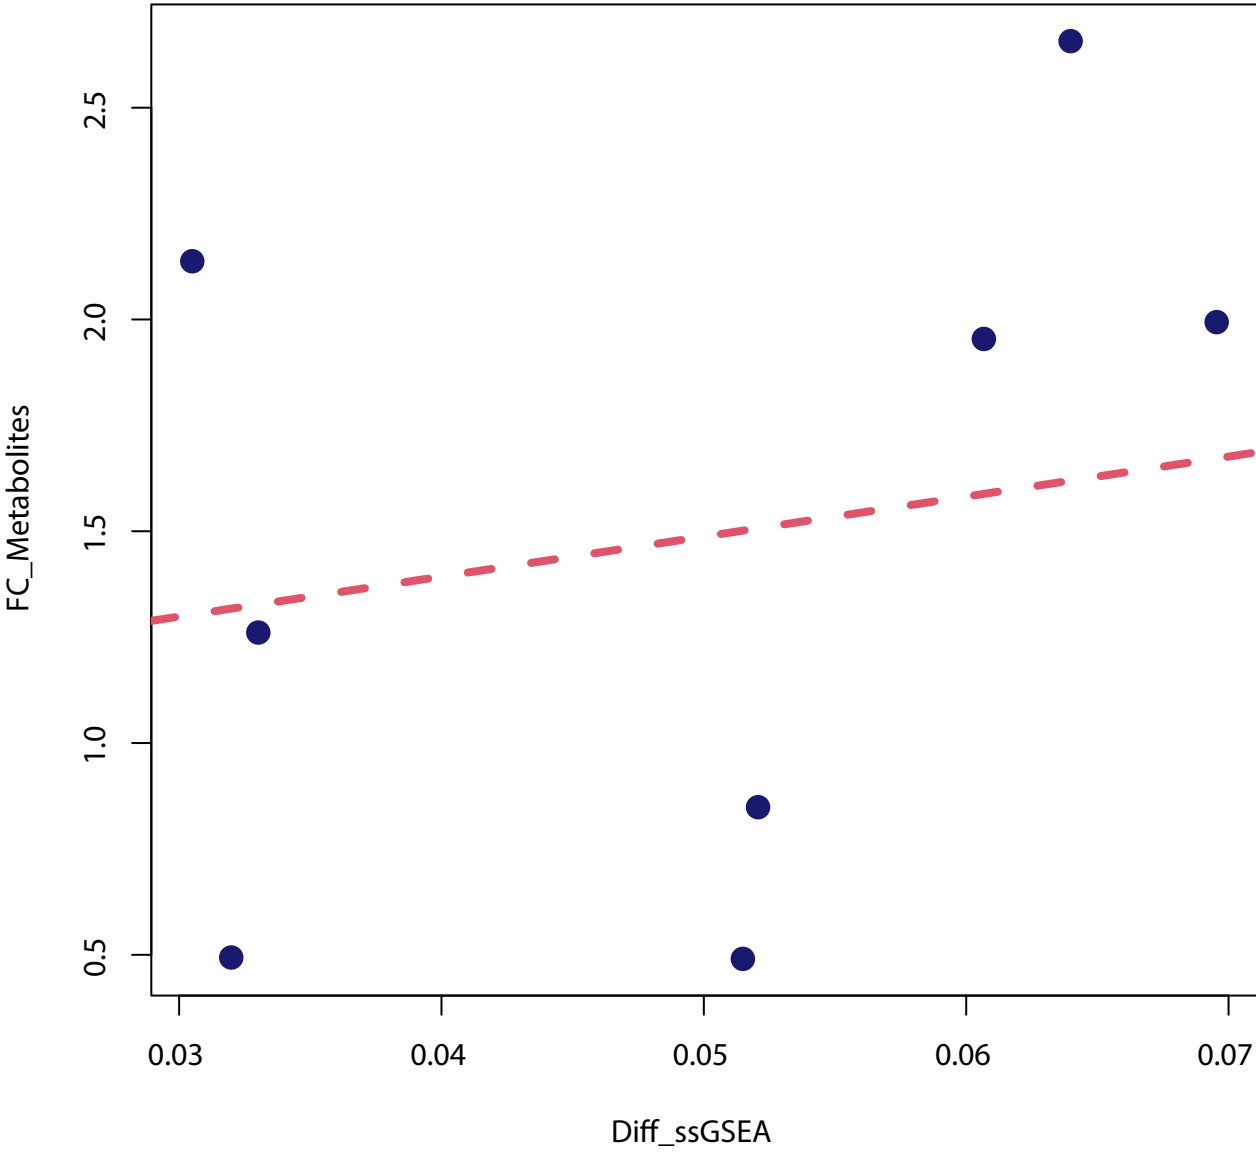

**Supplementary Figure S3** Correlation between metabolomic difference of the eight metabolites and differences of the averaged ssGSEA score of the modules using the eight metabolites as a substrate, in the *APEX1*-KD cells vs control. The x-axis is the difference of averaged ssGSEA score in the *APEX1*-KD cells vs control and the y-axis is the fold change of observed metabolomic profile.
