# Supplementary material for: A graph neural network model to estimate cell-wise metabolic flux using single-cell RNA-seq data
Source: PubMed Central journal article supplement — Genome Res. 2021 Oct;31(10):1867–84. doi: 10.1101/gr.271205.120 (PMC8494226; doi:10.1101/gr.271205.120), 2021-10
Supplement: supp_gr.271205.120_Supplementary_Figure_S4.pdf [file supp_gr.271205.120_Supplementary_Figure_S4.pdf]

### Supplementary Figure S4

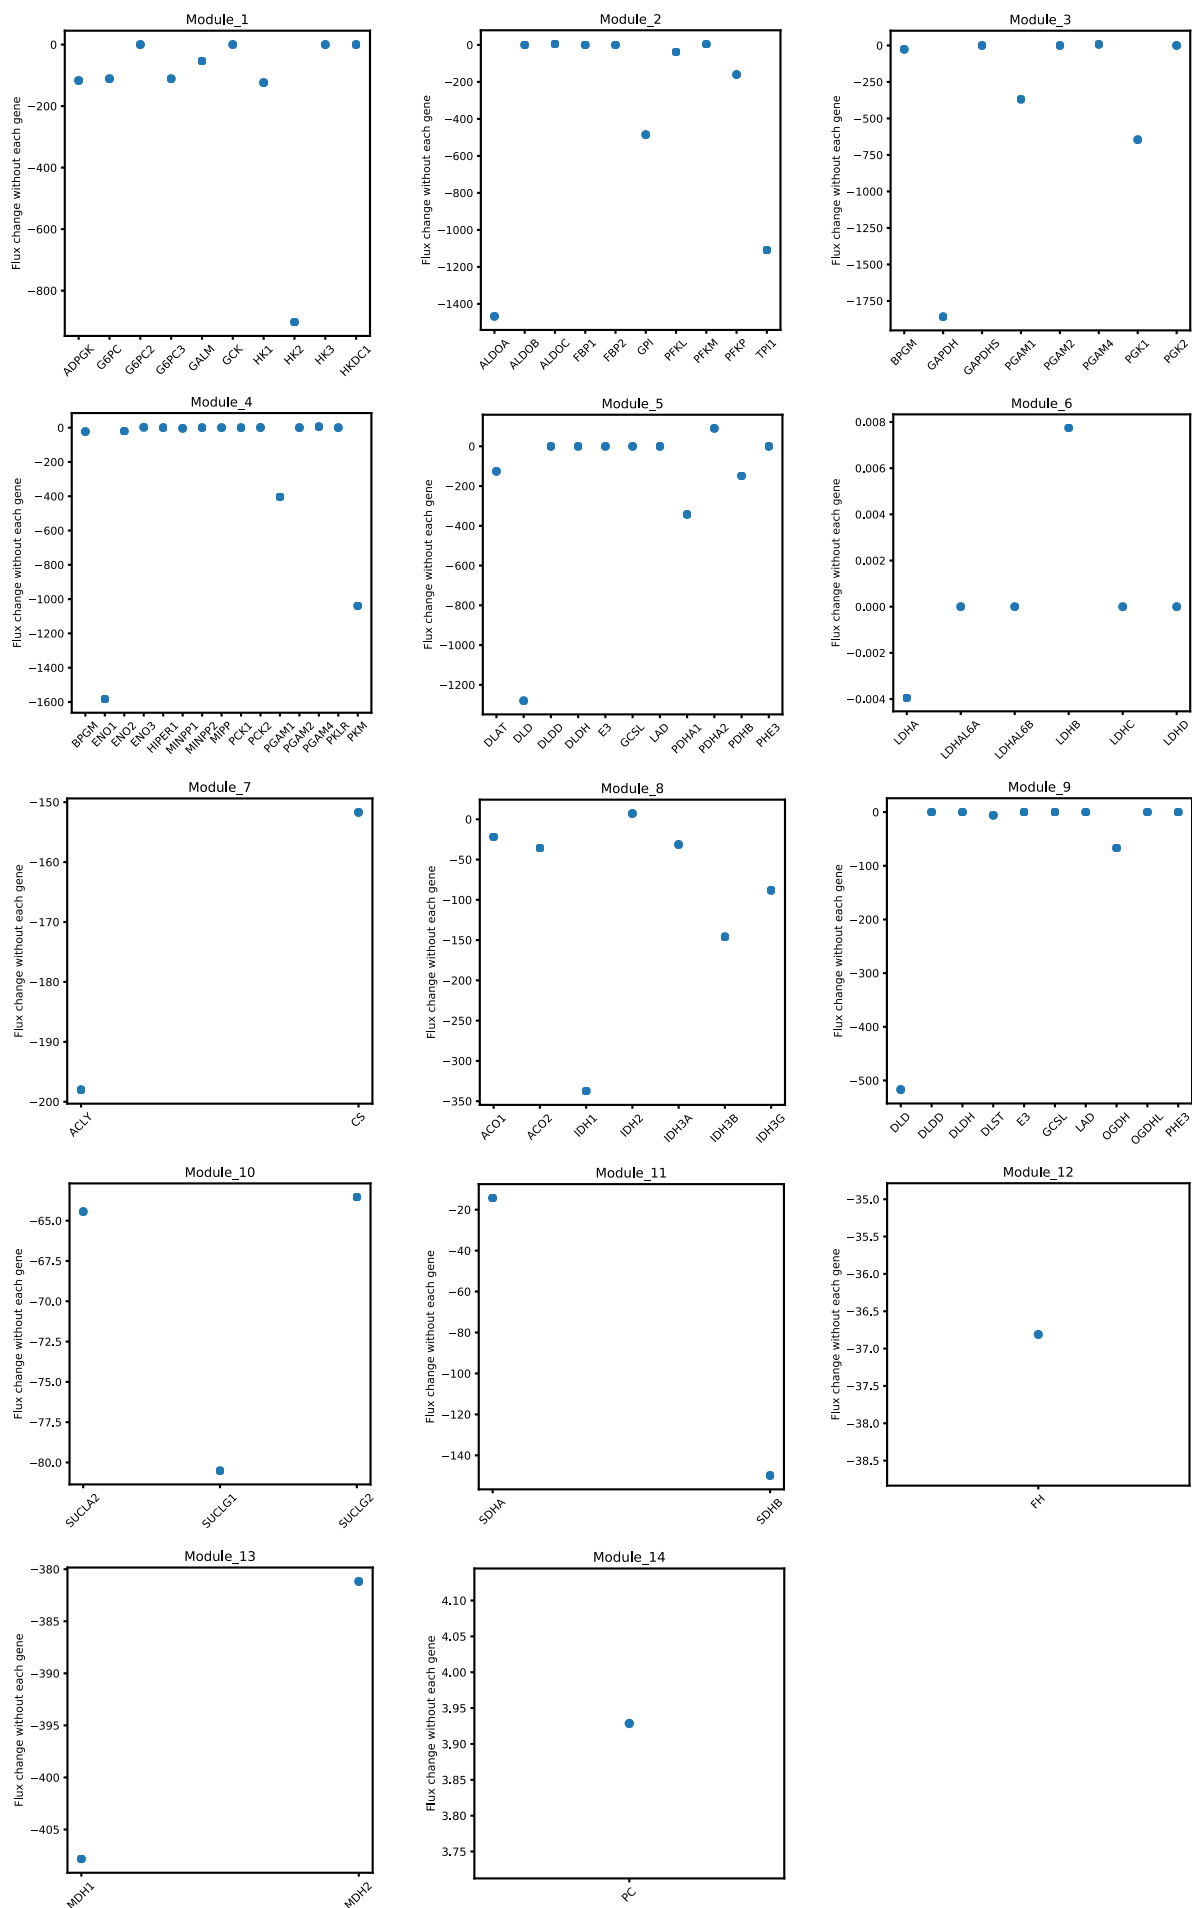

**Supplementary Figure S4** The impact of each gene to the metabolic module 1-14 (glycolysis and TCA cycle modules) in the Pa03c cell line data. The x-axis represents genes and y-axis represents impacts. The larger absolute value on the y-axis indicates a stronger impact of the gene to the metabolic module.
