# Supplementary material for: A graph neural network model to estimate cell-wise metabolic flux using single-cell RNA-seq data
Source: PubMed Central journal article supplement — Genome Res. 2021 Oct;31(10):1867–84. doi: 10.1101/gr.271205.120 (PMC8494226; doi:10.1101/gr.271205.120), 2021-10
Supplement: supp_gr.271205.120_Supplementary_Figure_S5.pdf [file supp_gr.271205.120_Supplementary_Figure_S5.pdf]

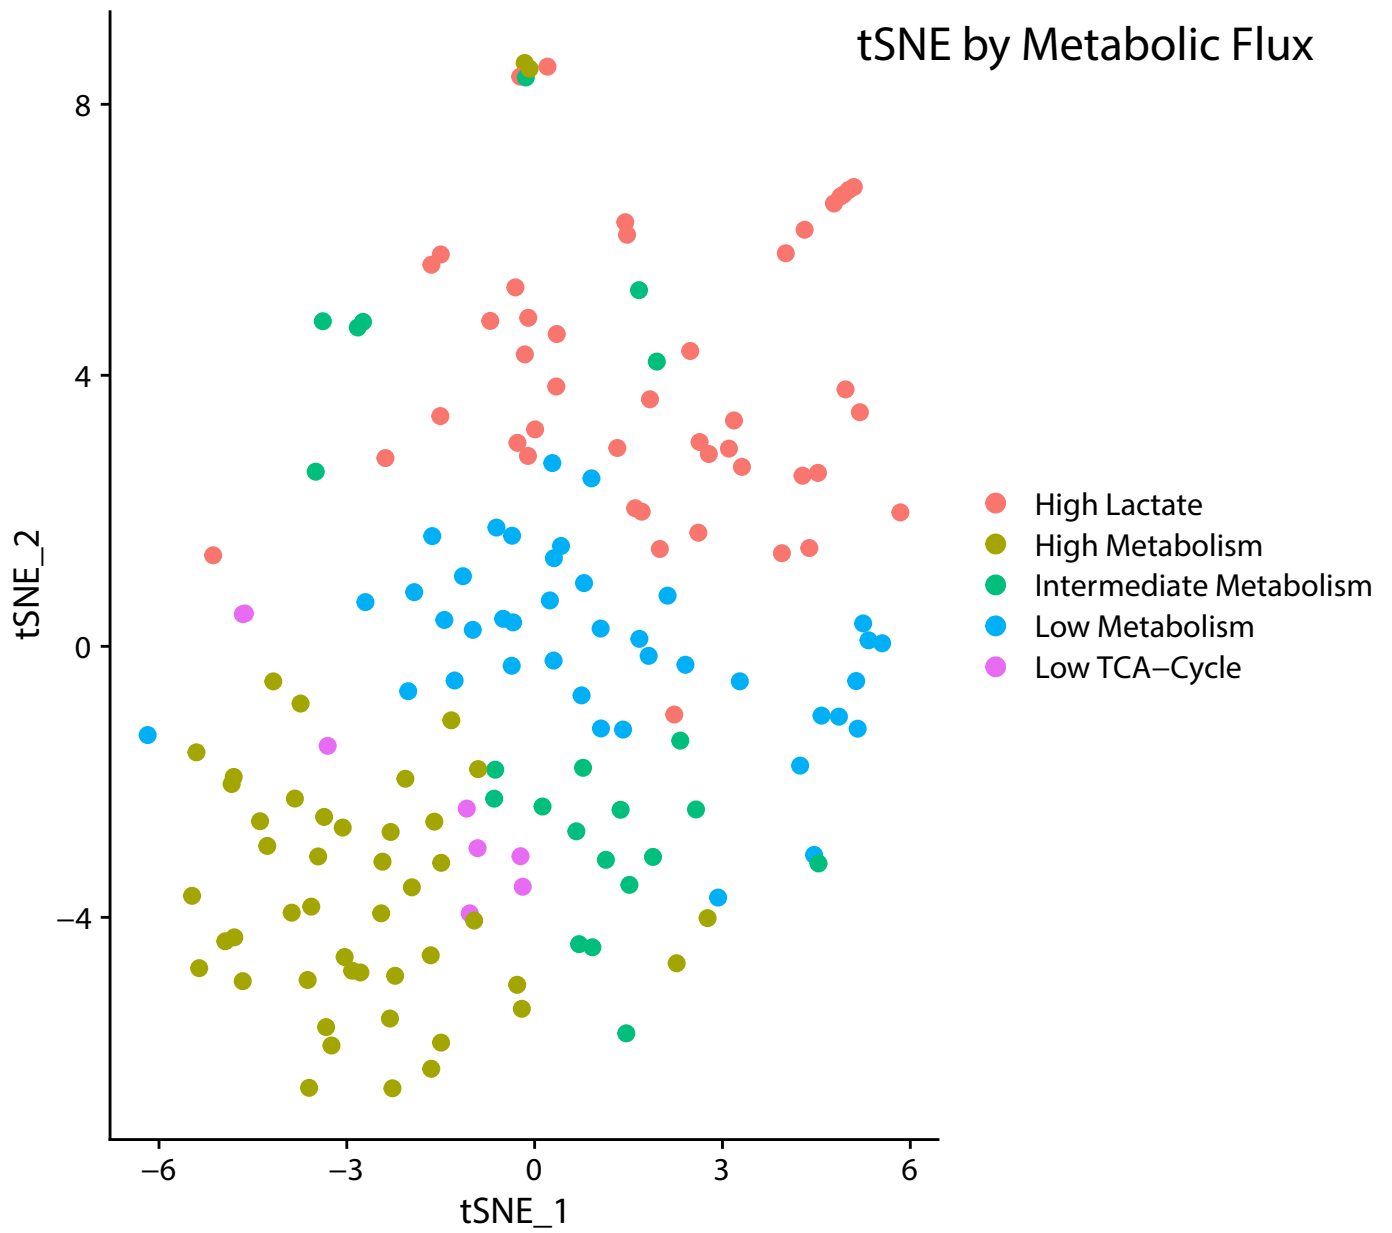

Supplementary Figure S5 tSNE plot of the cell clusters generated based on metabolic flux of the pancreatic cancer cell line data.
