# Supplementary material for: A graph neural network model to estimate cell-wise metabolic flux using single-cell RNA-seq data
Source: PubMed Central journal article supplement — Genome Res. 2021 Oct;31(10):1867–84. doi: 10.1101/gr.271205.120 (PMC8494226; doi:10.1101/gr.271205.120), 2021-10
Supplement: supp_gr.271205.120_Supplementary_Figure_S6.pdf [file supp_gr.271205.120_Supplementary_Figure_S6.pdf]

## Supplementary Figure S6

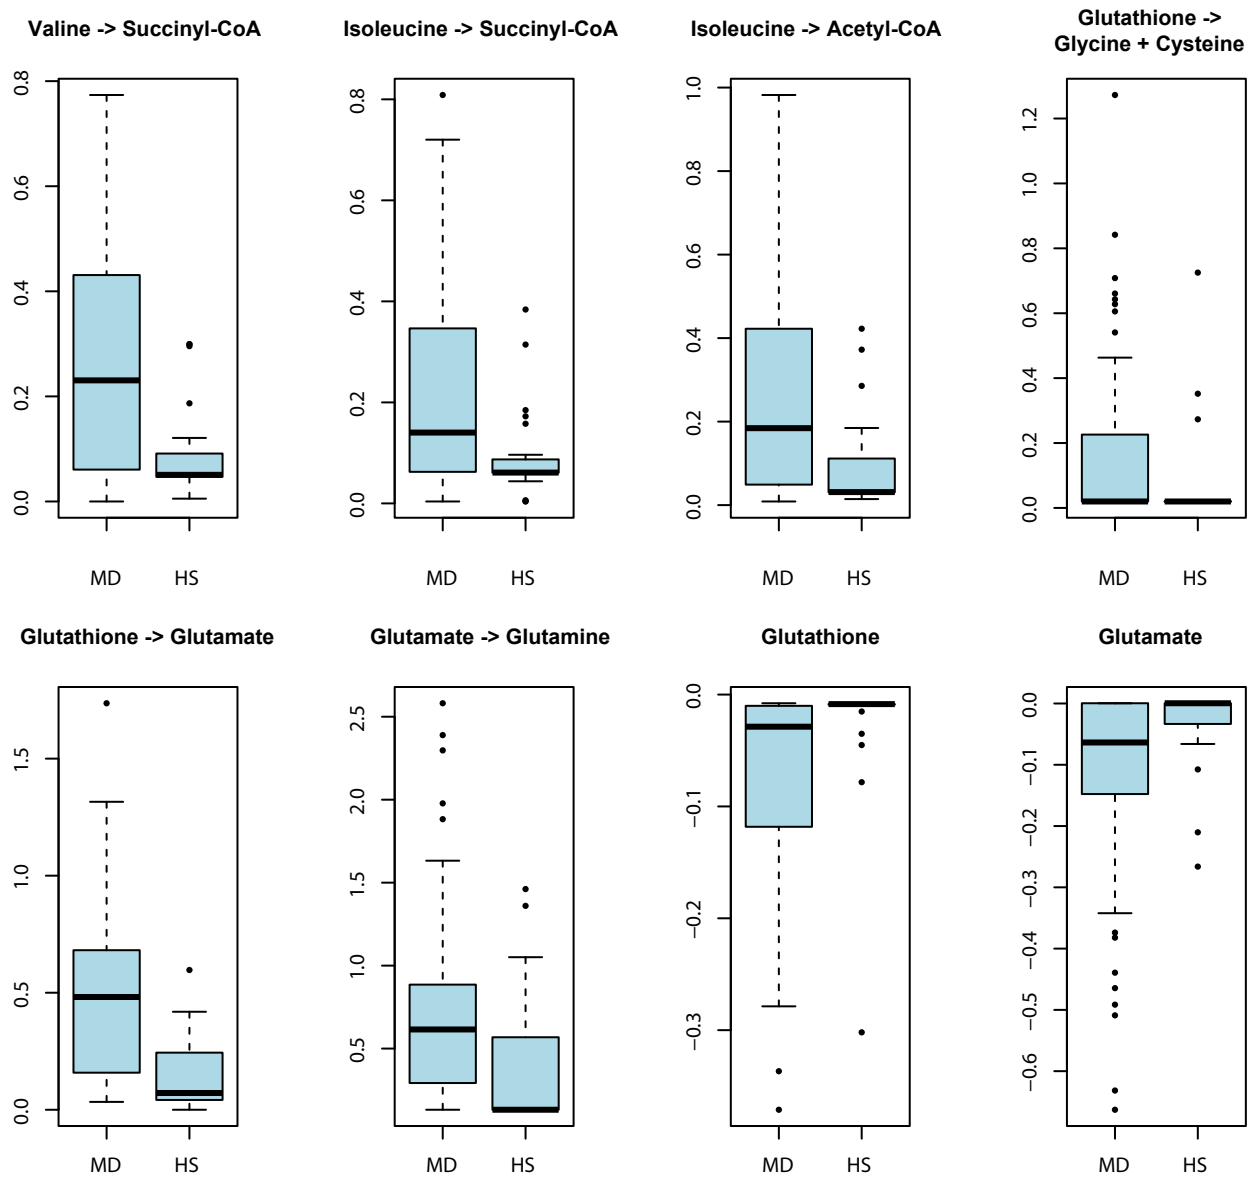

**Supplementary Figure S6** Boxplots of the predicted fluxes of Valine -> Succinyl-CoA, Isoleucine -> Succinyl-CoA, Isoleucine -> Acetyl-CoA, Glutathione -> Glycine + Cysteine, Glutathione -> Glutamate, Glutamate -> Glutamine and predicted changes in the abundance of Glutathione and Glutamate in the PV-ADSC of high stemness (HS) and more differentiation (MD).
