# Supplementary material for: A graph neural network model to estimate cell-wise metabolic flux using single-cell RNA-seq data
Source: HighWire-hosted journal article supplement (doi:10.1101/gr.271205.120), 2021-07-22
Supplement: SupplementalFigsAndTables.docx [file SupplementalFigsAndTables.docx]

**SUPPLEMENTARY FIGURES AND TABLES**

**Supplementary Figures**

**Supplementary Figure S1.** Factor graph representation of the reconstructed human metabolic map, in which the modules and metabolites were colored by green and pink, respectively.

**Supplementary Figure S2.** qRT-PCR results. Mock and SCR are controls and siRef-1 are knock down of APEX1.

**Supplementary Figure S3.** Correlation between metabolomic difference of the eight metabolites and differences of the averaged ssGSEA score of the modules using the eight metabolites as a substrate, in the APEX1-KD cells vs control. The x-axis is the difference of averaged ssGSEA score in the APEX1-KD cells vs control and the y-axis is the fold change of observed metabolomic profile.

**Supplementary Figure S4.** The impact of each gene to the metabolic module 1-14 (glycolysis and TCA cycle modules) in the Pa03c cell line data. The x-axis represents genes and y-axis represents impacts. The larger absolute value on the y-axis indicates a stronger impact of the gene to the metabolic module.

**Supplementary Figure S5.** tSNE plot of the cell clusters generated based on metabolic flux of the pancreatic cancer cell line data.

**Supplementary Figure S6.** Boxplots of the predicted fluxes of Valine -> Succinyl-CoA, Isoleucine -> Succinyl-CoA, Isoleucine -> Acetyl-CoA, Glutathione -> Glycine + Cysteine, Glutathione -> Glutamate, Glutamate -> Glutamine and predicted changes in the abundance of Glutathione and Glutamate in the PV-ADSC of high stemness (HS) and more differentiation (MD).

**Supplementary Figure S7.** Convergency of the flux balance loss and non-negative loss during the training of scFEA on the pancreatic cancer cell line data. The hyper parameters of the two loss were set differently to form four experiments. The flux balance loss, non-negative loss and total loss were blue, red and black-dash colored.

**Supplementary Tables**

**Supplementary Table S1.** Information of reorganized human metabolic map. The four sub tables (1) module_info, (2) module_reactions, (3) gene_list, (4) removed_cofactors listed (1) information of summarized modules including module ID, super module ID and the input and output of each module, (2) the reactions in each module, (3) the genes involved in each reaction, (4) the small metabolites and cofactors that were excluded from flux imbalance loss, respectively.

**Supplementary Table S2.** Differentially expressed genes (DEG) and Pathway Enrichment (PE) results of the Pa03c cell line data. The sub table DEGs of Pa03c data listed the differentially expressed in APEX-1 KD vs Control under hypoxia and normoxia condition. The other four sub tables listed the pathways enriched by genes (1) up regulated in APEX-1 KD vs Control under hypoxia, (2) down regulated in APEX-1 KD vs Control under hypoxia, (3) up regulated in APEX-1 KD vs Control under normoxia, and (4) down regulated in APEX-1 KD vs Control under normoxia, respectively.

**Supplementary Table S3.** ssGSEA results, metabolomics data and clusters of metabolic modules derived in the Pa03c cell line data. The four sub tables (1) ssGSEA results, (2) Complete Metabolomic data, and (3) Imbalance of metabolites, listed the following results on the Pa03c cell line data: (1) ssGSEA results on the glycolytic and TCA cycle related modules, (2) averaged metabolomic profiles of each condition, and (3) averaged predicted imbalance of each intermediate metabolites in the module map formed by the glycolytic and TCA cycle related modules, respectively.

**Supplementary Table S4.** Predicted cell type specific fluxome and metabolic imbalance in the melanoma and head and neck cancer data. The four tables listed the predicted metabolic fluxome and imbalance of intermediate substrates in the GSE72056 melanoma and GSE103322 head and neck cancer data, respectively.
