# Supplementary material for: A graph neural network model to estimate cell-wise metabolic flux using single-cell RNA-seq data
Source: HighWire-hosted journal article supplement (doi:10.1101/gr.271205.120), 2021-07-22
Supplement: Supplementary_Table_S1.xlsx [file Supplementary_Table_S1.xlsx]

## Sheet: Table Description
Supplementary Table S1. Information of reorganized human metabolic map. The four sub tables (1) module_info, (2) module_reactions, (3) gene_list, (4) removed_cofactors listed (1) information of summarized modules including module ID, super module ID and the input and output of each module, (2) the reactions in each module, (3) the genes involved in each reaction, (4) the small metabolites and cof…
Sub table Module_info:	Module_id	Module ID
	Compound_IN_name	Input Compound
	Compound_IN_ID	Input Compound ID
	Compound_OUT_name
	Compound_OUT_ID
	Supermodule_id	Supermodule ID
Module_reaction	Rid.1	Reaction ID
	Rid	KEGG Reaction ID
	EC	EC number
	Irreversible	Reversibility of the reaction
	Pathway	Pathway ID of the reaction
	Reaction_formula	Reaction formula
	C_in	Input Compound
	C_out	Output Compound
	Gene_symbol	Gene symbol of the enzymes catalyzing this reaction
Gene list	Rid	Reaction ID
	Gene_symbol	Gene symbol of the enzymes catalyzing this reaction
Removed_CoFactors	C_id	Compound ID of the compounds excluded from flux balance consideration
	Compound	Compound name of the compounds excluded from flux balance consideration

## Sheet: Module_info
	Module_id	Compound_IN_name	Compound_IN_ID	Compound_OUT_name	Compound_OUT_ID	Supermodule_id
M_1	1	Glucose	C00267	G6P	C00668	1
M_2	2	G6P	C00668	G3P	C00118	1
M_3	3	G3P	C00118	3PD	C00197	1
M_4	4	3PD	C00197	Pyruvate	C00022	1
M_5	5	Pyruvate	C00022	Acetyl-Coa	C00024	1
M_6	6	Pyruvate	C00022	Lactate	C00256	1
M_7	7	Acetyl-CoA+Oxaloacetate	C00024+C00036	Citrate	C00158	1
M_8	8	Citrate	C00158	2OG	C00026	1
M_9	9	2OG	C00026	Succinyl-CoA	C00091	1
M_10	10	Succinyl-CoA	C00091	Succinate	C00042	1
M_11	11	Succinate	C00042	Fumarate	C00122	1
M_12	12	Fumarate	C00122	Malate	C00149	1
M_13	13	Malate	C00149	Oxaloacetate	C00036	1
M_14	14	Pyruvate	C00022	Oxaloacetate	C00036	1
M_15	15	3PD	C00197	Serine	C00065	2
M_16	16	Serine	C00065	Pyruvate	C00022	2
M_17	17	Serine	C00065	Cysteine	C00097	2
M_18	18	Serine	C00065	Glycine	C00037	2
M_19	19	Glycine	C00037	Creatine	C00300	2
M_20	20	Glycine	C00037	Glyoxylate	C00048	2
M_21	21	Choline	C00114	Glycine	C00037	2
M_22	22	Glycine	C00037	Glycine-OUT	C00000	2
M_23	23	Glycine	C00037	Glutathione	C00051	2
M_24	24	Glutathione	C00051	Glycine + Cysteine	C00037+C00097	2
M_25	25	Glutathione	C00051	glutamate	C00025	2
M_26	26	Glutamate + Cysteine	C00025+C00097	Glutathione	C00051	2
M_27	27	Serine	C00065	2-Aminoacrylate	C02218	2
M_28	28	Serine	C00065	Methionine	C00073	2
M_29	29	Cysteine	C00097	Pyruvate	C00022	2
M_30	30	Methionine	C00073	Cysteine	C00097	2
M_31	31	Methionine	C00073	Methionine-OUT	C00000	2
M_32	32	Threonine	C00188	Propanoyl-CoA	C00100	2
M_33	33	G3P	C00118	PRPP	C00119	3
M_34	34	Acetyl-CoA	C00024	Fatty Acid	CC0001	4
M_35	35	Fatty Acid	CC0001	Acetyl-CoA	C00024	4
M_36	36	Aspartate	C00049	Pyrimidine	CC0002	5
M_37	37	Aspartate	C00049	Aspartate-OUT	C00000	5
M_38	38	Aspartate	C00049	Asparagine	C00152	5
M_39	39	Aspartate	C00049	Fumarate	C00122	5
M_40	40	Aspartate	C00049	Oxaloacetate	C00036	5
M_41	41	Aspartate	C00049	B-Alanine	C00099	6
M_42	42	Spermine	C00750	B-Alanine	C00099	6
M_43	43	Histidine	C00135	B-Alanine	C00099	6
M_44	44	B-Alanine	C00099	Acetyl-CoA	C00024	6
M_45	45	Pyrimidine	CC0002	B-Alanine	C00099	6
M_46	46	Propanoyl-CoA	C00100	Succinate	C00042	7
M_47	47	Propanoyl-CoA	C00100	Acetyl-CoA	C00024	7
M_48	48	Glutamate	C00025	Glutamine	C00064	8
M_49	49	Glutamate	C00025	GABA	C00334	8
M_50	50	GABA	C00334	Succinate	C00042	8
M_51	51	Glutamate	C00025	2OG	C00026	8
M_52	52	Histidine	C00135	glutamate	C00025	8
M_53	53	Leucine	C00123	Acetyl-CoA	C00024	9
M_54	54	Valine	C00183	Succinyl-CoA	C00091	9
M_55	55	Isoleucine	C00407	Succinyl-CoA	C00091	9
M_56	56	Isoleucine	C00407	Acetyl-CoA	C00024	9
M_57	57	Tyrosine	C00082	Fumarate	C00122	9
M_58	58	Tyrosine	C00082	Tyrosine-OUT	C00000	9
M_59	59	Phenylalanine	C00079	Tyrosine	C00082	9
M_60	60	lysine	C00047	Acetyl-CoA	C00024	9
M_61	61	Putrescine	C00134	GABA	C00334	10
M_62	62	Ornithine	C00077	Putrescine	C00134	10
M_63	63	Arginine	C00062	Ornithine	C00077	10
M_64	64	Arginine	C00062	Putrescine	C00134	10
M_65	65	Argininosuccinate	C03406	Arginine + Fumarate	C00062+C00122	10
M_66	66	Citruline + Aspartate	C00327+C00049	Argininosuccinate	C03406	10
M_67	67	Ornithine	C00077	Proline	C00148	10
M_68	68	Proline	C00148	Glyoxylate + pyruvate	C00048+C00022	10
M_69	69	Putresine	C00134	Spermine	C00750	11
M_70	70	Methionine	C00073	Spermine	C00750	11
M_71	71	Glucose_in	C00000	Glucose	C00267	12
M_72	72	Acetyl-CoA_in	C00000	Acetyl-CoA	C00024	12
M_73	73	Citrate_in	C00000	Citrate	C00158	12
M_74	74	2OG_in	C00000	2OG	C00026	12
M_75	75	Succinate_in	C00000	Succinate	C00042	12
M_76	76	Malate_in	C00000	Malate	C00149	12
M_77	77	Oxaloacetate_in	C00000	Oxaloacetate	C00036	12
M_78	78	Lactate_in	C00000	Lactate	C00186	12
M_79	79	serine_in	C00000	serine	C00065	12
M_80	80	Cysteine_in	C00000	Cysteine	C00097	12
M_81	81	Glycine_in	C00000	Glycine	C00037	12
M_82	82	Creatine_in	C00000	Creatine	C00300	12
M_83	83	Choline_in	C00000	Choline	C00114	12
M_84	84	Threonine_in	C00000	Threonine	C00188	12
M_85	85	Aspartate_in	C00000	Aspartate	C00049	12
M_86	86	Asparagine_in	C00000	Asparagine	C00152	12
M_87	87	Pyrimidine_in	C00000	Pyrimidine	CC0002	12
M_88	88	Histidine_in	C00000	Histidine	C00135	12
M_89	89	B-Alanine_in	C00000	B-Alanine	C00099	12
M_90	90	Propanoyl-CoA_in	C00000	Propanoyl-CoA	C00100	12
M_91	91	glutamate_in	C00000	glutamate	C00025	12
M_92	92	Glutamine_in	C00000	Glutamine	C00064	12
M_93	93	GABA_in	C00000	GABA	C00334	12
M_94	94	Tyrosine_in	C00000	Tyrosine	C00082	12
M_95	95	phenylalanine_in	C00000	phenylalanine	C00079	12
M_96	96	Valine_in	C00000	Valine	C00183	12
M_97	97	Isoleucine_in	C00000	Isoleucine	C00407	12
M_98	98	Leucine_in	C00000	Leucine	C00123	12
M_99	99	Lysine_in	C00000	Lysine	C00047	12
M_100	100	Arginine	C00000	Arginine	C00062	12
M_101	101	Citrulline_in	C00000	Citrulline	C00327	12
M_102	102	Ornithine_in	C00000	Ornithine	C00077	12
M_103	103	Proline_in	C00000	Proline	C00148	12
M_104	104	Tryptophan_in	C00000	Tryptophan	C00078	12
M_105	105	Fatty Acid_in	C00000	Fatty Acid	CC0001	12
M_106	106	Glucose	C00267	Glucose-6-phosphate	C00668	13
M_107	107	Glucose-6-phosphate	C00668	UDP-N-acetylglucosamine	C00043	13
M_108	108	Glucose-6-phosphate	C00668	Glucose-1-phosphate	C00103	13
M_109	109	Glucose-1-phosphate	C00103	UDP-glucuronic acid	C00167	13
M_110	110	UDP-glucuronic acid+UDP-N-acetylglucosamine	C00167+C00043	Hyaluronic acid	C00518	13
M_111	111	Glucose-1-phosphate	C00103	Glycogen	C00182	14
M_112	112	UDP-N-acetylglucosamine	C00043	CMP-N-acetylneuraminate	C00128	15
M_113	113	Acetyl-CoA	C00024	(E,E)-Farnesyl-PP	C00448	16
M_114	114	(E,E)-Farnesyl-PP	C00448	Geranylgeranyl-PP	C00353	16
M_115	115	(E,E)-Farnesyl-PP	C00448	Farnesal	C03461	16
M_116	116	(E,E)-Farnesyl-PP	C00448	Ubiquinone	C00399	16
M_117	117	(E,E)-Farnesyl-PP	C00448	Dolichyl phosphate	C00110	16
M_118	118	Dolichyl phosphate	C00110	Dolichyl phosphate D-mannose	C03862	16
M_119	119	Dolichyl phosphate	C00110	(GlcNAc)4 (Man)3 (Asn)1	G00015	16
M_120	120	(Glc)3 (GlcNAc)2 (Man)9 (PP-Dol)1+Protein asparagine	G00008+C03021	(Glc)3 (GlcNAc)2 (Man)9 (Asn)1	G00009	16
M_121	121	(Glc)3 (GlcNAc)2 (Man)9 (Asn)1	G00009	(GlcNAc)4 (Man)3 (Asn)1	G00015	16
M_122	122	(GlcNAc)4 (Man)3 (Asn)1	G00015	(Gal)2 (GlcNAc)4 (LFuc)1 (Man)3 (Neu5Ac)2 (Asn)1	G00018	16
M_123	123	(GlcNAc)4 (Man)3 (Asn)1	G00015	(GlcNAc)7 (Man)3 (Asn)1	G00022	16
M_124	124	(GlcNAc)4 (Man)3 (Asn)1	G00015	(GlcNAc)5 (Man)3 (Asn)1	G00019	16
M_125	125	Dolichyl phosphate D-mannose+Protein serine	C03862+C02189	(Gal)1 (GlcNAc)1 (Man)1 (Ser/Thr)1	G13084	17
M_126	126	(Gal)1 (GlcNAc)1 (Man)1 (Ser/Thr)1	G13084	(Gal)1 (GlcNAc)1 (Man)1 (Neu5Ac)1 (Ser/Thr)1	G13085	17
M_127	127	(Gal)1 (GlcNAc)1 (Man)1 (Ser/Thr)1	G13084	(Gal)1 (GlcA)1 (GlcNAc)1 (Man)1 (S)1 (Ser/Thr)1	G13088	17
M_128	128	(Gal)1 (GlcNAc)1 (Man)1 (Ser/Thr)1	G13084	(Gal)1 (GlcNAc)1 (LFuc)1 (Man)1 (Ser/Thr)1	G13100	17
M_129	129	Protein serine	C02189	(Gal)2 (GlcA)1 (Xyl)1 (Ser)1	G00157	18
M_130	130	(Gal)2 (GlcA)1 (Xyl)1 (Ser)1	G00157	Dermatan	C01490	18
M_131	131	Chondroitin	C00401	Dermatan	C01490	18
M_132	132	(Gal)2 (GlcA)1 (Xyl)1 (Ser)1	G00157	(Gal)2 (GlcA)2 (GlcNAc)2 (Xyl)1 (Ser)1	G00164	19
M_133	133	PRPP+Glutamine	C00119+C00064	IMP	C00130	20
M_134	134	5-Phosphoribosylamine	C03090	AICAR	C04677	20
M_135	135	AICAR	C04677	IMP	C00130	20
M_136	136	IMP	C00130	AMP	C00020	20
M_137	137	IMP	C00130	XMP	C00655	20
M_138	138	AMP	C00020	Deoxyadenosine	C00559	20
M_139	139	AMP	C00020	Adenine	C00147	20
M_140	140	ADP	C00008	Deoxyadenosine	C00559	20
M_141	141	Deoxyadenosine	C00559	Adenine	C00147	20
M_142	142	Deoxyadenosine	C00559	Hypoxanthine	C00262	20
M_143	143	IMP	C00130	Hypoxanthine	C00262	20
M_144	144	Hypoxanthine	C00262	Xanthine	C00385	20
M_145	145	XMP	C00655	Xanthine	C00385	20
M_146	146	Xanthine	C00385	Uric acid	C00366	20
M_147	147	Xanthine	C00385	Guanine	C00242	20
M_148	148	XMP	C00655	Guanine	C00242	20
M_149	149	GMP	C00144	Guanine	C00242	20
M_150	150	PRPP	C00119	UMP	C00105	21
M_151	151	Orotidylic acid	C01103	UMP	C00105	21
M_152	152	UMP	C00105	B-Alanine	C00099	21
M_153	153	UMP	C00105	CDP	C00112	21
M_154	154	Uracil	C00106	B-Alanine	C00099	21
M_155	155	UTP	C00075	CDP	C00112	21
M_156	156	CDP	C00112	Cytidine	C00475	21
M_157	157	CDP	C00112	dCDP	C00705	21
M_158	158	dCDP	C00705	Deoxycytidine	C00881	21
M_159	159	dCMP	C00239	Deoxycytidine	C00881	21
M_160	160	dCDP	C00705	dUMP	C00365	21
M_161	161	dCDP	C00705	dCTP	C00458	21
M_162	162	dUMP	C00365	Deoxyuridine	C00526	21
M_163	163	dUMP	C00365	dTMP	C00364	21
M_164	164	dTMP	C00364	Succinyl-CoA	C00091	21
M_165	165	dTMP	C00364	dTTP	C00459	21
M_166	166	Thymine	C00178	Succinyl-CoA	C00091	21
M_167	167	(E,E)-Farnesyl-PP	C00448	Cholesterol	C00187	22
M_168	168	Cholesterol	C00187	Chenodeoxycholate	C02528	22
M_169	169	Cholesterol	C00187	Steroid_hormone	CC0003	22

## Sheet: Module_reaction
Rid.1	Rid	EC	Irreversible	Pathway	Reaction_formula	C_in	C_out	Gene_symbol
1080	R01602	5.1.3.3	TRUE	hsa00010	C00267 <=> C00221	C00267	C00221	GALM
4033	R10619	5.1.3.3	NA	hsa00052	C00124 <=> C00984	C00124	C00984	GALM
4034	R10619	5.1.3.3	NA	hsa01100	C00124 <=> C00984	C00124	C00984	GALM
213	R00299	2.7.1.1	FALSE	hsa00524	C00002 + C00031 <=> C00008 + C00092	C00002;C00031	C00008;C00092	HK1;HK2;HK3;HKDC1
505	R00725	2.7.1.1	FALSE		C00081 + C00031 <=> C00104 + C00092	C00081;C00031	C00104;C00092	HK1;HK2;HK3;HKDC1
534	R00760	2.7.1.1	FALSE		C00002 + C00095 <=> C00008 + C00085	C00002;C00095	C00008;C00085	HK1;HK2;HK3;HKDC1
576	R00867	2.7.1.1	FALSE	hsa00051	C00002 + C00095 <=> C00008 + C05345	C00002;C00095	C00008;C05345	HK1;HK2;HK3;HKDC1
577	R00867	2.7.1.1	FALSE	hsa01100	C00002 + C00095 <=> C00008 + C05345	C00002;C00095	C00008;C05345	HK1;HK2;HK3;HKDC1
581	R00876	2.7.1.1	FALSE		C00081 + C00095 <=> C00104 + C00085	C00081;C00095	C00104;C00085	HK1;HK2;HK3;HKDC1
804	R01139	2.7.1.1	FALSE		C00131 + C00031 <=> C00206 + C00092	C00131;C00031	C00206;C00092	HK1;HK2;HK3;HKDC1
805	R01140	2.7.1.1	FALSE		C00131 + C00095 <=> C00206 + C00085	C00131;C00095	C00206;C00085	HK1;HK2;HK3;HKDC1
932	R01326	2.7.1.1	FALSE	hsa00051	C00002 + C00159 <=> C00008 + C00275	C00002;C00159	C00008;C00275	HK1;HK2;HK3;HKDC1
933	R01326	2.7.1.1	FALSE	hsa00520	C00002 + C00159 <=> C00008 + C00275	C00002;C00159	C00008;C00275	HK1;HK2;HK3;HKDC1
934	R01326	2.7.1.1	FALSE	hsa01100	C00002 + C00159 <=> C00008 + C00275	C00002;C00159	C00008;C00275	HK1;HK2;HK3;HKDC1
935	R01327	2.7.1.1	FALSE		C00081 + C00159 <=> C00104 + C00275	C00081;C00159	C00104;C00275	HK1;HK2;HK3;HKDC1
937	R01330	2.7.1.1	FALSE		C00131 + C00159 <=> C00206 + C00275	C00131;C00159	C00206;C00275	HK1;HK2;HK3;HKDC1
1078	R01600	2.7.1.1	FALSE	hsa00010	C00002 + C00221 <=> C00008 + C01172	C00002;C00221	C00008;C01172	HK1;HK2;HK3;HKDC1
1158	R01786	2.7.1.1	FALSE	hsa00010	C00002 + C00267 <=> C00008 + C00668	C00002;C00267	C00008;C00668	HK1;HK2;HK3;HKDC1
1160	R01786	2.7.1.1	FALSE	hsa00052	C00002 + C00267 <=> C00008 + C00668	C00002;C00267	C00008;C00668	HK1;HK2;HK3;HKDC1
1162	R01786	2.7.1.1	FALSE	hsa00500	C00002 + C00267 <=> C00008 + C00668	C00002;C00267	C00008;C00668	HK1;HK2;HK3;HKDC1
1164	R01786	2.7.1.1	FALSE	hsa00520	C00002 + C00267 <=> C00008 + C00668	C00002;C00267	C00008;C00668	HK1;HK2;HK3;HKDC1
1166	R01786	2.7.1.1	FALSE	hsa01100	C00002 + C00267 <=> C00008 + C00668	C00002;C00267	C00008;C00668	HK1;HK2;HK3;HKDC1
1301	R01961	2.7.1.1	FALSE	hsa00520	C00002 + C00329 <=> C00008 + C00352	C00002;C00329	C00008;C00352	HK1;HK2;HK3;HKDC1
1303	R01964	2.7.1.1	FALSE		C00081 + C00329 <=> C00104 + C00352	C00081;C00329	C00104;C00352	HK1;HK2;HK3;HKDC1
1304	R01965	2.7.1.1	FALSE		C00131 + C00329 <=> C00206 + C00352	C00131;C00329	C00206;C00352	HK1;HK2;HK3;HKDC1
1779	R02848	2.7.1.1	TRUE		C00002 + C00738 <=> C00008 + C02965	C00002;C00738	C00008;C02965	HK1;HK2;HK3;HKDC1
1780	R02849	2.7.1.1	FALSE		C00081 + C00738 <=> C00104 + C02965	C00081;C00738	C00104;C02965	HK1;HK2;HK3;HKDC1
1781	R02850	2.7.1.1	FALSE		C00131 + C00738 <=> C00206 + C02965	C00131;C00738	C00206;C02965	HK1;HK2;HK3;HKDC1
1783	R02865	2.7.1.1	FALSE		C00002 + C00794 <=> C00008 + C01096	C00002;C00794	C00008;C01096	HK1;HK2;HK3;HKDC1
1784	R02867	2.7.1.1	FALSE		C00081 + C00794 <=> C00104 + C01096	C00081;C00794	C00104;C01096	HK1;HK2;HK3;HKDC1
1785	R02868	2.7.1.1	FALSE		C00131 + C00794 <=> C00206 + C01096	C00131;C00794	C00206;C01096	HK1;HK2;HK3;HKDC1
2202	R03920	2.7.1.1	FALSE	hsa00500	C00002 + C02336 <=> C00008 + C05345	C00002;C02336	C00008;C05345	HK1;HK2;HK3;HKDC1
2203	R03920	2.7.1.1	FALSE	hsa00520	C00002 + C02336 <=> C00008 + C05345	C00002;C02336	C00008;C05345	HK1;HK2;HK3;HKDC1
214	R00299	2.7.1.2	TRUE	hsa00524	C00002 + C00031 <=> C00008 + C00092	C00002;C00031	C00008;C00092	GCK
1079	R01600	2.7.1.2	FALSE	hsa00010	C00002 + C00221 <=> C00008 + C01172	C00002;C00221	C00008;C01172	GCK
1159	R01786	2.7.1.2	FALSE	hsa00010	C00002 + C00267 <=> C00008 + C00668	C00002;C00267	C00008;C00668	GCK
1161	R01786	2.7.1.2	FALSE	hsa00052	C00002 + C00267 <=> C00008 + C00668	C00002;C00267	C00008;C00668	GCK
1163	R01786	2.7.1.2	FALSE	hsa00500	C00002 + C00267 <=> C00008 + C00668	C00002;C00267	C00008;C00668	GCK
1165	R01786	2.7.1.2	FALSE	hsa00520	C00002 + C00267 <=> C00008 + C00668	C00002;C00267	C00008;C00668	GCK
1167	R01786	2.7.1.2	FALSE	hsa01100	C00002 + C00267 <=> C00008 + C00668	C00002;C00267	C00008;C00668	GCK
2899	R05804	2.7.1.147	TRUE		C00008 + C00031 <=> C00020 + C00092	C00008;C00031	C00020;C00092	ADPGK
3898	R09085	2.7.1.147	FALSE	hsa00010	C00267 + C00008 <=> C00668 + C00020	C00267;C00008	C00668;C00020	ADPGK
3899	R09085	2.7.1.147	FALSE	hsa01100	C00267 + C00008 <=> C00668 + C00020	C00267;C00008	C00668;C00020	ADPGK
3900	R09086	2.7.1.147	FALSE	hsa00010	C00221 + C00008 <=> C01172 + C00020	C00221;C00008	C01172;C00020	ADPGK
215	R00303	3.1.3.9	TRUE		C00092 + C00001 <=> C00031 + C00009	C00092;C00001	C00031;C00009	G6PC;G6PC2
1170	R01788	3.1.3.9	FALSE	hsa00010	C00668 + C00001 <=> C00267 + C00009	C00668;C00001	C00267;C00009	G6PC;G6PC2;G6PC3
1171	R01788	3.1.3.9	FALSE	hsa00052	C00668 + C00001 <=> C00267 + C00009	C00668;C00001	C00267;C00009	G6PC;G6PC2;G6PC3
1172	R01788	3.1.3.9	FALSE	hsa00500	C00668 + C00001 <=> C00267 + C00009	C00668;C00001	C00267;C00009	G6PC;G6PC2;G6PC3
1173	R01788	3.1.3.9	FALSE	hsa01100	C00668 + C00001 <=> C00267 + C00009	C00668;C00001	C00267;C00009	G6PC;G6PC2;G6PC3
Rid	EC	Irreversible	Pathway	Rid.1	C_in	C_out	Gene_symbol
544	R00771	5.3.1.9	TRUE		C00092 <=> C00085	C00092	C00085	GPI
1726	R02739	5.3.1.9	FALSE	hsa00010	C00668 <=> C01172	C00668	C01172	GPI
1727	R02739	5.3.1.9	FALSE	hsa00030	C00668 <=> C01172	C00668	C01172	GPI
1728	R02739	5.3.1.9	FALSE	hsa01100	C00668 <=> C01172	C00668	C01172	GPI
1729	R02740	5.3.1.9	FALSE	hsa00010	C00668 <=> C05345	C00668	C05345	GPI
1730	R02740	5.3.1.9	FALSE	hsa00030	C00668 <=> C05345	C00668	C05345	GPI
1731	R02740	5.3.1.9	FALSE	hsa00500	C00668 <=> C05345	C00668	C05345	GPI
1732	R02740	5.3.1.9	FALSE	hsa00520	C00668 <=> C05345	C00668	C05345	GPI
1733	R02740	5.3.1.9	FALSE	hsa01100	C00668 <=> C05345	C00668	C05345	GPI
1982	R03321	5.3.1.9	FALSE	hsa00010	C01172 <=> C05345	C01172	C05345	GPI
1983	R03321	5.3.1.9	FALSE	hsa01100	C01172 <=> C05345	C01172	C05345	GPI
535	R00762	3.1.3.11	TRUE	hsa01100	C00354 + C00001 <=> C00085 + C00009	C00354;C00001	C00085;C00009	FBP1;FBP2
1231	R01845	3.1.3.11	FALSE	hsa01100	C00447 + C00001 <=> C05382 + C00009	C00447;C00001	C05382;C00009	FBP1;FBP2
2607	R04780	3.1.3.11	FALSE	hsa00010	C05378 + C00001 <=> C05345 + C00009	C05378;C00001	C05345;C00009	FBP1;FBP2
2608	R04780	3.1.3.11	FALSE	hsa00030	C05378 + C00001 <=> C05345 + C00009	C05378;C00001	C05345;C00009	FBP1;FBP2
2609	R04780	3.1.3.11	FALSE	hsa00051	C05378 + C00001 <=> C05345 + C00009	C05378;C00001	C05345;C00009	FBP1;FBP2
2610	R04780	3.1.3.11	FALSE	hsa01100	C05378 + C00001 <=> C05345 + C00009	C05378;C00001	C05345;C00009	FBP1;FBP2
538	R00767	2.7.1.11	FALSE		C00063 + C00085 <=> C00112 + C00354	C00063;C00085	C00112;C00354	PFKL;PFKM;PFKP
542	R00769	2.7.1.11	FALSE		C00075 + C00085 <=> C00015 + C00354	C00075;C00085	C00015;C00354	PFKL;PFKM;PFKP
543	R00770	2.7.1.11	FALSE		C00081 + C00085 <=> C00104 + C00354	C00081;C00085	C00104;C00354	PFKL;PFKM;PFKP
1230	R01843	2.7.1.11	FALSE		C00002 + C05382 <=> C00008 + C00447	C00002;C05382	C00008;C00447	PFKL;PFKM;PFKP
1932	R03236	2.7.1.11	FALSE	hsa00052	C01097 + C00002 <=> C03785 + C00008	C01097;C00002	C03785;C00008	PFKL;PFKM;PFKP
1933	R03236	2.7.1.11	FALSE	hsa01100	C01097 + C00002 <=> C03785 + C00008	C01097;C00002	C03785;C00008	PFKL;PFKM;PFKP
1934	R03237	2.7.1.11	FALSE	hsa00052	C00063 + C01097 <=> C00112 + C03785	C00063;C01097	C00112;C03785	PFKL;PFKM;PFKP
1935	R03237	2.7.1.11	FALSE	hsa01100	C00063 + C01097 <=> C00112 + C03785	C00063;C01097	C00112;C03785	PFKL;PFKM;PFKP
1936	R03238	2.7.1.11	FALSE	hsa00052	C00075 + C01097 <=> C00015 + C03785	C00075;C01097	C00015;C03785	PFKL;PFKM;PFKP
1937	R03238	2.7.1.11	FALSE	hsa01100	C00075 + C01097 <=> C00015 + C03785	C00075;C01097	C00015;C03785	PFKL;PFKM;PFKP
1938	R03239	2.7.1.11	FALSE	hsa00052	C00081 + C01097 <=> C00104 + C03785	C00081;C01097	C00104;C03785	PFKL;PFKM;PFKP
1939	R03239	2.7.1.11	FALSE	hsa01100	C00081 + C01097 <=> C00104 + C03785	C00081;C01097	C00104;C03785	PFKL;PFKM;PFKP
2603	R04779	2.7.1.11	FALSE	hsa00010	C00002 + C05345 <=> C00008 + C05378	C00002;C05345	C00008;C05378	PFKL;PFKM;PFKP
2604	R04779	2.7.1.11	FALSE	hsa00030	C00002 + C05345 <=> C00008 + C05378	C00002;C05345	C00008;C05378	PFKL;PFKM;PFKP
2605	R04779	2.7.1.11	FALSE	hsa00051	C00002 + C05345 <=> C00008 + C05378	C00002;C05345	C00008;C05378	PFKL;PFKM;PFKP
2606	R04779	2.7.1.11	FALSE	hsa01100	C00002 + C05345 <=> C00008 + C05378	C00002;C05345	C00008;C05378	PFKL;PFKM;PFKP
735	R01068	4.1.2.13	TRUE	hsa01100	C00354 <=> C00111 + C00118	C00354	C00111;C00118	ALDOA;ALDOB;ALDOC
736	R01070	4.1.2.13	FALSE	hsa00010	C05378 <=> C00111 + C00118	C05378	C00111;C00118	ALDOA;ALDOB;ALDOC
737	R01070	4.1.2.13	FALSE	hsa00030	C05378 <=> C00111 + C00118	C05378	C00111;C00118	ALDOA;ALDOB;ALDOC
738	R01070	4.1.2.13	FALSE	hsa00051	C05378 <=> C00111 + C00118	C05378	C00111;C00118	ALDOA;ALDOB;ALDOC
739	R01070	4.1.2.13	FALSE	hsa01100	C05378 <=> C00111 + C00118	C05378	C00111;C00118	ALDOA;ALDOB;ALDOC
1214	R01829	4.1.2.13	FALSE	hsa01100	C00447 <=> C00111 + C00279	C00447	C00111;C00279	ALDOA;ALDOB;ALDOC
1639	R02568	4.1.2.13	FALSE	hsa00051	C01094 <=> C00111 + C00577	C01094	C00111;C00577	ALDOA;ALDOB;ALDOC
1640	R02568	4.1.2.13	FALSE	hsa01100	C01094 <=> C00111 + C00577	C01094	C00111;C00577	ALDOA;ALDOB;ALDOC
704	R01015	5.3.1.1	TRUE	hsa00010	C00118 <=> C00111	C00118	C00111	TPI1
705	R01015	5.3.1.1	TRUE	hsa00051	C00118 <=> C00111	C00118	C00111	TPI1
706	R01015	5.3.1.1	TRUE	hsa00562	C00118 <=> C00111	C00118	C00111	TPI1
707	R01015	5.3.1.1	TRUE	hsa01100	C00118 <=> C00111	C00118	C00111	TPI1
Rid	EC	Irreversible	Pathway	Rid.1	C_in	C_out	Gene_symbol
731	R01061	1.2.1.12	TRUE	hsa00010	C00118 + C00009 + C00003 <=> C00236 + C00004 + C00080	C00118;C00009;C00003	C00236;C00004;C00080	GAPDH;GAPDHS
732	R01061	1.2.1.12	TRUE	hsa01100	C00118 + C00009 + C00003 <=> C00236 + C00004 + C00080	C00118;C00009;C00003	C00236;C00004;C00080	GAPDH;GAPDHS
1103	R01662	5.4.2.4	TRUE	hsa00010	C00236 <=> C01159	C00236	C01159	BPGM
1027	R01512	2.7.2.3	TRUE	hsa00010	C00002 + C00197 <=> C00008 + C00236	C00002;C00197	C00008;C00236	PGK1;PGK2
1028	R01512	2.7.2.3	TRUE	hsa01100	C00002 + C00197 <=> C00008 + C00236	C00002;C00197	C00008;C00236	PGK1;PGK2
1037	R01518	5.4.2.11	NA	hsa00010	C00631 <=> C00197	C00631	C00197	PGAM4;PGAM1;PGAM2;BPGM
1038	R01518	5.4.2.11	NA	hsa00260	C00631 <=> C00197	C00631	C00197	PGAM4;PGAM1;PGAM2;BPGM
1039	R01518	5.4.2.11	NA	hsa01100	C00631 <=> C00197	C00631	C00197	PGAM4;PGAM1;PGAM2;BPGM
4141	R01516	5.4.2.11	FALSE	hsa00010	C01159 + C00615 <=> C00197 + C04262	C01159;C00615	C00197;C04262	PGAM4;PGAM1;PGAM2;BPGM
4142	R05000	5.4.2.11	TRUE	hsa00130	C05847 + C00156 <=> C05848 + C00013	C05847;C00156	C05848;C00013	COQ2;CL640;COQ10D1;MSA1;PHB;PPT
Rid	EC	Irreversible	Pathway	Rid.1	C_in	C_out	Gene_symbol
1037	R01518	5.4.2.11	NA	hsa00010	C00631 <=> C00197	C00631	C00197	PGAM4;PGAM1;PGAM2;BPGM
1038	R01518	5.4.2.11	NA	hsa00260	C00631 <=> C00197	C00631	C00197	PGAM4;PGAM1;PGAM2;BPGM
1039	R01518	5.4.2.11	NA	hsa01100	C00631 <=> C00197	C00631	C00197	PGAM4;PGAM1;PGAM2;BPGM
4141	R01516	5.4.2.11	FALSE	hsa00010	C01159 + C00615 <=> C00197 + C04262	C01159;C00615	C00197;C04262	PGAM4;PGAM1;PGAM2;BPGM
4142	R05000	5.4.2.11	TRUE	hsa00130	C05847 + C00156 <=> C05848 + C00013	C05847;C00156	C05848;C00013	COQ2;CL640;COQ10D1;MSA1;PHB;PPT
4037	R09532	3.1.3.80	TRUE	hsa00010	C01159 + C00001 <=> C00631 + C00009	C01159;C00001	C00631;C00009	MINPP1;HIPER1;MINPP2;MIPP
434	R00658	4.2.1.11	TRUE	hsa00010	C00631 <=> C00074 + C00001	C00631	C00074;C00001	ENO1;ENO2;ENO3
435	R00658	4.2.1.11	TRUE	hsa01100	C00631 <=> C00074 + C00001	C00631	C00074;C00001	ENO1;ENO2;ENO3
2306	R04206	4.2.1.11	FALSE	hsa00010	C03356 <=> C04309 + C00001	C03356	C04309;C00001	ENO1;ENO2;ENO3
299	R00431	4.1.1.32	TRUE	hsa00010	C00044 + C00036 <=> C00035 + C00074 + C00011	C00044;C00036	C00035;C00074;C00011	PCK1;PCK2
300	R00431	4.1.1.32	TRUE	hsa00020	C00044 + C00036 <=> C00035 + C00074 + C00011	C00044;C00036	C00035;C00074;C00011	PCK1;PCK2
301	R00431	4.1.1.32	TRUE	hsa00620	C00044 + C00036 <=> C00035 + C00074 + C00011	C00044;C00036	C00035;C00074;C00011	PCK1;PCK2
302	R00431	4.1.1.32	TRUE	hsa01100	C00044 + C00036 <=> C00035 + C00074 + C00011	C00044;C00036	C00035;C00074;C00011	PCK1;PCK2
506	R00726	4.1.1.32	FALSE	hsa00010	C00081 + C00036 <=> C00104 + C00074 + C00011	C00081;C00036	C00104;C00074;C00011	PCK1;PCK2
507	R00726	4.1.1.32	FALSE	hsa00020	C00081 + C00036 <=> C00104 + C00074 + C00011	C00081;C00036	C00104;C00074;C00011	PCK1;PCK2
508	R00726	4.1.1.32	FALSE	hsa00620	C00081 + C00036 <=> C00104 + C00074 + C00011	C00081;C00036	C00104;C00074;C00011	PCK1;PCK2
509	R00726	4.1.1.32	FALSE	hsa01100	C00081 + C00036 <=> C00104 + C00074 + C00011	C00081;C00036	C00104;C00074;C00011	PCK1;PCK2
115	R00200	2.7.1.40	TRUE	hsa00010	C00002 + C00022 <=> C00008 + C00074	C00002;C00022	C00008;C00074	PKLR;PKM
116	R00200	2.7.1.40	TRUE	hsa00230	C00002 + C00022 <=> C00008 + C00074	C00002;C00022	C00008;C00074	PKLR;PKM
117	R00200	2.7.1.40	TRUE	hsa00620	C00002 + C00022 <=> C00008 + C00074	C00002;C00022	C00008;C00074	PKLR;PKM
118	R00200	2.7.1.40	TRUE	hsa01100	C00002 + C00022 <=> C00008 + C00074	C00002;C00022	C00008;C00074	PKLR;PKM
297	R00430	2.7.1.40	FALSE	hsa00010	C00044 + C00022 <=> C00035 + C00074	C00044;C00022	C00035;C00074	PKLR;PKM
298	R00430	2.7.1.40	FALSE	hsa01100	C00044 + C00022 <=> C00035 + C00074	C00044;C00022	C00035;C00074	PKLR;PKM
386	R00572	2.7.1.40	FALSE	hsa00010	C00063 + C00022 <=> C00112 + C00074	C00063;C00022	C00112;C00074	PKLR;PKM
436	R00659	2.7.1.40	FALSE	hsa00010	C00075 + C00022 <=> C00015 + C00074	C00075;C00022	C00015;C00074	PKLR;PKM
504	R00724	2.7.1.40	FALSE	hsa00010	C00081 + C00022 <=> C00104 + C00074	C00081;C00022	C00104;C00074	PKLR;PKM
802	R01138	2.7.1.40	FALSE	hsa00010	C00131 + C00022 <=> C00206 + C00074	C00131;C00022	C00206;C00074	PKLR;PKM
803	R01138	2.7.1.40	FALSE	hsa01100	C00131 + C00022 <=> C00206 + C00074	C00131;C00022	C00206;C00074	PKLR;PKM
1237	R01858	2.7.1.40	FALSE	hsa00010	C00286 + C00022 <=> C00361 + C00074	C00286;C00022	C00361;C00074	PKLR;PKM
1238	R01858	2.7.1.40	FALSE	hsa01100	C00286 + C00022 <=> C00361 + C00074	C00286;C00022	C00361;C00074	PKLR;PKM
1515	R02320	2.7.1.40	FALSE	hsa00010	C00201 + C00022 <=> C00454 + C00074	C00201;C00022	C00454;C00074	PKLR;PKM
1516	R02320	2.7.1.40	FALSE	hsa01100	C00201 + C00022 <=> C00454 + C00074	C00201;C00022	C00454;C00074	PKLR;PKM
Rid	EC	Irreversible	Pathway	Rid.1	C_in	C_out	Gene_symbol
5	R00014	1.2.4.1	FALSE	hsa00010	C00022 + C00068 <=> C05125 + C00011	C00022;C00068	C05125;C00011	PDHA1;PDHA2;PDHB
6	R00014	1.2.4.1	FALSE	hsa00020	C00022 + C00068 <=> C05125 + C00011	C00022;C00068	C05125;C00011	PDHA1;PDHA2;PDHB
7	R00014	1.2.4.1	FALSE	hsa00620	C00022 + C00068 <=> C05125 + C00011	C00022;C00068	C05125;C00011	PDHA1;PDHA2;PDHB
119	R00209	1.2.4.1	FALSE	hsa01100	C00022 + C00010 + C00003 <=> C00024 + C00011 + C00004 + C00080	C00022;C00010;C00003	C00024;C00011;C00004;C00080	PDHA1;PDHA2;PDHB
1126	R01699	1.2.4.1	TRUE		C00022 + C15972 <=> C16255 + C00011	C00022;C15972	C16255;C00011	PDHA1;PDHA2;PDHB
1953	R03270	1.2.4.1	FALSE	hsa00010	C05125 + C15972 <=> C16255 + C00068	C05125;C15972	C16255;C00068	PDHA1;PDHA2;PDHB
1954	R03270	1.2.4.1	FALSE	hsa00020	C05125 + C15972 <=> C16255 + C00068	C05125;C15972	C16255;C00068	PDHA1;PDHA2;PDHB
1955	R03270	1.2.4.1	FALSE	hsa00620	C05125 + C15972 <=> C16255 + C00068	C05125;C15972	C16255;C00068	PDHA1;PDHA2;PDHB
120	R00209	1.8.1.4	FALSE	hsa01100	C00022 + C00010 + C00003 <=> C00024 + C00011 + C00004 + C00080	C00022;C00010;C00003	C00024;C00011;C00004;C00080	DLD
1125	R01698	1.8.1.4	FALSE		C00579 + C00003 <=> C00248 + C00004 + C00080	C00579;C00003	C00248;C00004;C00080	DLD
2159	R03815	1.8.1.4	FALSE	hsa00260	C02972 + C00003 <=> C02051 + C00004 + C00080	C02972;C00003	C02051;C00004;C00080	DLD
3533	R07618	1.8.1.4	FALSE	hsa00010	C15973 + C00003 <=> C15972 + C00004 + C00080	C15973;C00003	C15972;C00004;C00080	DLD
3534	R07618	1.8.1.4	FALSE	hsa00020	C15973 + C00003 <=> C15972 + C00004 + C00080	C15973;C00003	C15972;C00004;C00080	DLD
3535	R07618	1.8.1.4	FALSE	hsa00280	C15973 + C00003 <=> C15972 + C00004 + C00080	C15973;C00003	C15972;C00004;C00080	DLD
3536	R07618	1.8.1.4	FALSE	hsa00620	C15973 + C00003 <=> C15972 + C00004 + C00080	C15973;C00003	C15972;C00004;C00080	DLD
3537	R07618	1.8.1.4	FALSE	hsa01100	C15973 + C00003 <=> C15972 + C00004 + C00080	C15973;C00003	C15972;C00004;C00080	DLD
3806	R08549	1.8.1.4	FALSE	hsa01100	C00026 + C00010 + C00003 <=> C00091 + C00011 + C00004 + C00080	C00026;C00010;C00003	C00091;C00011;C00004;C00080	DLD
3808	R08550	1.8.1.4	TRUE		C16832 + C00003 <=> C16237 + C00004 + C00080	C16832;C00003	C16237;C00004;C00080	DLD
4082	R08550	1.8.1.4	TRUE	hsa00310	C16832 + C00003 <=> C16237 + C00004 + C00080	C16832;C00003	C16237;C00004;C00080	DLD;DLDD;DLDH;E3;GCSL;LAD;PHE3
4083	R03815	1.8.1.4	TRUE	hsa00310	C02972 + C00003 <=> C02051 + C00004 + C00080	C02972;C00003	C02051;C00004;C00080	DLD;DLDD;DLDH;E3;GCSL;LAD;PHE3
4084	R07618	1.8.1.4	TRUE	hsa00310	C15973 + C00003 <=> C15972 + C00004 + C00080	C15973;C00003	C15972;C00004;C00080	DLD;DLDD;DLDH;E3;GCSL;LAD;PHE3
4085	R00209	1.8.1.4	TRUE	hsa00310	C00022 + C00010 + C00003 <=> C00024 + C00011 + C00004 + C00080	C00022;C00010;C00003	C00024;C00011;C00004;C00080	DLD;DLDD;DLDH;E3;GCSL;LAD;PHE3
4086	R01221	1.8.1.4	TRUE	hsa00310	C00037 + C00101 + C00003 <=> C00143 + C00014 + C00011 + C00004 + C00080	C00037;C00101;C00003	C00143;C00014;C00011;C00004;C00080	DLD;DLDD;DLDH;E3;GCSL;LAD;PHE3
4087	R01698	1.8.1.4	TRUE	hsa00310	C00579 + C00003 <=> C00248 + C00004 + C00080	C00579;C00003	C00248;C00004;C00080	DLD;DLDD;DLDH;E3;GCSL;LAD;PHE3
4088	R01933	1.8.1.4	TRUE	hsa00310	C00322 + C00010 + C00003 <=> C00527 + C00011 + C00004 + C00080	C00322;C00010;C00003	C00527;C00011;C00004;C00080	DLD;DLDD;DLDH;E3;GCSL;LAD;PHE3
4089	R08549	1.8.1.4	TRUE	hsa00310	C00026 + C00010 + C00003 <=> C00091 + C00011 + C00004 + C00080	C00026;C00010;C00003	C00091;C00011;C00004;C00080	DLD;DLDD;DLDH;E3;GCSL;LAD;PHE3
121	R00209	2.3.1.12	FALSE	hsa01100	C00022 + C00010 + C00003 <=> C00024 + C00011 + C00004 + C00080	C00022;C00010;C00003	C00024;C00011;C00004;C00080	DLAT
1641	R02569	2.3.1.12	TRUE	hsa00010	C00024 + C15973 <=> C00010 + C16255	C00024;C15973	C00010;C16255	DLAT
1642	R02569	2.3.1.12	TRUE	hsa00020	C00024 + C15973 <=> C00010 + C16255	C00024;C15973	C00010;C16255	DLAT
1643	R02569	2.3.1.12	TRUE	hsa00620	C00024 + C15973 <=> C00010 + C16255	C00024;C15973	C00010;C16255	DLAT
Rid	EC	Irreversible	Pathway	Rid.1	C_in	C_out	Gene_symbol
468	R00703	1.1.1.27	TRUE	hsa00010	C00186 + C00003 <=> C00022 + C00004 + C00080	C00186;C00003	C00022;C00004;C00080	LDHAL6A;LDHA;LDHB;LDHC;LDHAL6B
469	R00703	1.1.1.27	TRUE	hsa00620	C00186 + C00003 <=> C00022 + C00004 + C00080	C00186;C00003	C00022;C00004;C00080	LDHAL6A;LDHA;LDHB;LDHC;LDHAL6B
470	R00703	1.1.1.27	TRUE	hsa01100	C00186 + C00003 <=> C00022 + C00004 + C00080	C00186;C00003	C00022;C00004;C00080	LDHAL6A;LDHA;LDHB;LDHC;LDHAL6B
689	R01000	1.1.1.27	FALSE	hsa00640	C05984 + C00003 <=> C00109 + C00004 + C00080	C05984;C00003	C00109;C00004;C00080	LDHAL6A;LDHA;LDHB;LDHC;LDHAL6B
1885	R03104	1.1.1.27	FALSE	hsa00270	C05823 + C00003 <=> C00957 + C00004 + C00080	C05823;C00003	C00957;C00004;C00080	LDHAL6A;LDHA;LDHB;LDHC;LDHAL6B
114	R00197	1.1.2.4	TRUE	hsa00620	C00256 + 2 C00125 <=> C00022 + 2 C00126 + 2 C00080	C00256;C00125	C00022;C00126;C00080	LDHD
Rid	EC	Irreversible	Pathway	Rid.1	C_in	C_out	Gene_symbol
241	R00351	2.3.3.1	TRUE	hsa00020	C00158 + C00010 <=> C00024 + C00001 + C00036	C00158;C00010	C00024;C00001;C00036	CS
242	R00351	2.3.3.1	TRUE	hsa00630	C00158 + C00010 <=> C00024 + C00001 + C00036	C00158;C00010	C00024;C00001;C00036	CS
243	R00351	2.3.3.1	TRUE	hsa01100	C00158 + C00010 <=> C00024 + C00001 + C00036	C00158;C00010	C00024;C00001;C00036	CS
244	R00352	2.3.3.8	TRUE	hsa00020	C00002 + C00158 + C00010 <=> C00008 + C00009 + C00024 + C00036	C00002;C00158;C00010	C00008;C00009;C00024;C00036	ACLY
245	R00352	2.3.3.8	TRUE	hsa01100	C00002 + C00158 + C00010 <=> C00008 + C00009 + C00024 + C00036	C00002;C00158;C00010	C00008;C00009;C00024;C00036	ACLY
Rid	EC	Irreversible	Pathway	Rid.1	C_in	C_out	Gene_symbol
928	R01324	4.2.1.3	TRUE	hsa01100	C00158 <=> C00311	C00158	C00311	ACO1;ACO2
929	R01325	4.2.1.3	TRUE	hsa00020	C00158 <=> C00417 + C00001	C00158	C00417;C00001	ACO1;ACO2
930	R01325	4.2.1.3	TRUE	hsa00630	C00158 <=> C00417 + C00001	C00158	C00417;C00001	ACO1;ACO2
931	R01325	4.2.1.3	TRUE	hsa01100	C00158 <=> C00417 + C00001	C00158	C00417;C00001	ACO1;ACO2
1265	R01900	4.2.1.3	TRUE	hsa00020	C00311 <=> C00417 + C00001	C00311	C00417;C00001	ACO1;ACO2
1266	R01900	4.2.1.3	TRUE	hsa00630	C00311 <=> C00417 + C00001	C00311	C00417;C00001	ACO1;ACO2
1267	R01900	4.2.1.3	TRUE	hsa01100	C00311 <=> C00417 + C00001	C00311	C00417;C00001	ACO1;ACO2
185	R00267	1.1.1.42	TRUE	hsa00480	C00311 + C00006 <=> C00026 + C00011 + C00005 + C00080	C00311;C00006	C00026;C00011;C00005;C00080	IDH1;IDH2
186	R00267	1.1.1.42	TRUE	hsa01100	C00311 + C00006 <=> C00026 + C00011 + C00005 + C00080	C00311;C00006	C00026;C00011;C00005;C00080	IDH1;IDH2
187	R00268	1.1.1.42	TRUE	hsa00020	C05379 <=> C00026 + C00011	C05379	C00026;C00011	IDH1;IDH2
188	R00268	1.1.1.42	TRUE	hsa01100	C05379 <=> C00026 + C00011	C05379	C00026;C00011	IDH1;IDH2
1263	R01899	1.1.1.42	TRUE	hsa00020	C00311 + C00006 <=> C05379 + C00005 + C00080	C00311;C00006	C05379;C00005;C00080	IDH1;IDH2
1264	R01899	1.1.1.42	TRUE	hsa01100	C00311 + C00006 <=> C05379 + C00005 + C00080	C00311;C00006	C05379;C00005;C00080	IDH1;IDH2
487	R00709	1.1.1.41	TRUE	hsa00020	C00311 + C00003 <=> C00026 + C00011 + C00004 + C00080	C00311;C00003	C00026;C00011;C00004;C00080	IDH3A;IDH3B;IDH3G
488	R00709	1.1.1.41	TRUE	hsa01100	C00311 + C00003 <=> C00026 + C00011 + C00004 + C00080	C00311;C00003	C00026;C00011;C00004;C00080	IDH3A;IDH3B;IDH3G
Rid	EC	Irreversible	Pathway	Rid.1	C_in	C_out	Gene_symbol
421	R00621	1.2.4.2	FALSE	hsa00020	C00026 + C00068 <=> C05381 + C00011	C00026;C00068	C05381;C00011	OGDH;OGDHL
1127	R01700	1.2.4.2	TRUE	hsa01100	C00026 + C15972 <=> C16254 + C00011	C00026;C15972	C16254;C00011	OGDH;OGDHL
1282	R01933	1.2.4.2	FALSE	hsa00380	C00322 + C00010 + C00003 <=> C00527 + C00011 + C00004 + C00080	C00322;C00010;C00003	C00527;C00011;C00004;C00080	OGDH;OGDHL
1286	R01940	1.2.4.2	FALSE	hsa00310	C00322 + C15972 <=> C06157 + C00011	C00322;C15972	C06157;C00011	OGDH;OGDHL
1287	R01940	1.2.4.2	FALSE	hsa01100	C00322 + C15972 <=> C06157 + C00011	C00322;C15972	C06157;C00011	OGDH;OGDHL
1980	R03316	1.2.4.2	FALSE	hsa00020	C05381 + C15972 <=> C16254 + C00068	C05381;C15972	C16254;C00068	OGDH;OGDHL
3805	R08549	1.2.4.2	FALSE	hsa01100	C00026 + C00010 + C00003 <=> C00091 + C00011 + C00004 + C00080	C00026;C00010;C00003	C00091;C00011;C00004;C00080	OGDH;OGDHL
1644	R02570	2.3.1.61	TRUE	hsa00020	C00091 + C15973 <=> C00010 + C16254	C00091;C15973	C00010;C16254	DLST
1645	R02570	2.3.1.61	TRUE	hsa01100	C00091 + C15973 <=> C00010 + C16254	C00091;C15973	C00010;C16254	DLST
1646	R02571	2.3.1.61	FALSE	hsa00310	C00527 + C15973 <=> C00010 + C06157	C00527;C15973	C00010;C06157	DLST
1647	R02571	2.3.1.61	FALSE	hsa01100	C00527 + C15973 <=> C00010 + C06157	C00527;C15973	C00010;C06157	DLST
3807	R08549	2.3.1.61	FALSE	hsa01100	C00026 + C00010 + C00003 <=> C00091 + C00011 + C00004 + C00080	C00026;C00010;C00003	C00091;C00011;C00004;C00080	DLST
120	R00209	1.8.1.4	FALSE	hsa01100	C00022 + C00010 + C00003 <=> C00024 + C00011 + C00004 + C00080	C00022;C00010;C00003	C00024;C00011;C00004;C00080	DLD
1125	R01698	1.8.1.4	FALSE		C00579 + C00003 <=> C00248 + C00004 + C00080	C00579;C00003	C00248;C00004;C00080	DLD
2159	R03815	1.8.1.4	FALSE	hsa00260	C02972 + C00003 <=> C02051 + C00004 + C00080	C02972;C00003	C02051;C00004;C00080	DLD
3533	R07618	1.8.1.4	FALSE	hsa00010	C15973 + C00003 <=> C15972 + C00004 + C00080	C15973;C00003	C15972;C00004;C00080	DLD
3534	R07618	1.8.1.4	FALSE	hsa00020	C15973 + C00003 <=> C15972 + C00004 + C00080	C15973;C00003	C15972;C00004;C00080	DLD
3535	R07618	1.8.1.4	FALSE	hsa00280	C15973 + C00003 <=> C15972 + C00004 + C00080	C15973;C00003	C15972;C00004;C00080	DLD
3536	R07618	1.8.1.4	FALSE	hsa00620	C15973 + C00003 <=> C15972 + C00004 + C00080	C15973;C00003	C15972;C00004;C00080	DLD
3537	R07618	1.8.1.4	FALSE	hsa01100	C15973 + C00003 <=> C15972 + C00004 + C00080	C15973;C00003	C15972;C00004;C00080	DLD
3806	R08549	1.8.1.4	FALSE	hsa01100	C00026 + C00010 + C00003 <=> C00091 + C00011 + C00004 + C00080	C00026;C00010;C00003	C00091;C00011;C00004;C00080	DLD
3808	R08550	1.8.1.4	TRUE		C16832 + C00003 <=> C16237 + C00004 + C00080	C16832;C00003	C16237;C00004;C00080	DLD
4082	R08550	1.8.1.4	TRUE	hsa00310	C16832 + C00003 <=> C16237 + C00004 + C00080	C16832;C00003	C16237;C00004;C00080	DLD;DLDD;DLDH;E3;GCSL;LAD;PHE3
4083	R03815	1.8.1.4	TRUE	hsa00310	C02972 + C00003 <=> C02051 + C00004 + C00080	C02972;C00003	C02051;C00004;C00080	DLD;DLDD;DLDH;E3;GCSL;LAD;PHE3
4084	R07618	1.8.1.4	TRUE	hsa00310	C15973 + C00003 <=> C15972 + C00004 + C00080	C15973;C00003	C15972;C00004;C00080	DLD;DLDD;DLDH;E3;GCSL;LAD;PHE3
4085	R00209	1.8.1.4	TRUE	hsa00310	C00022 + C00010 + C00003 <=> C00024 + C00011 + C00004 + C00080	C00022;C00010;C00003	C00024;C00011;C00004;C00080	DLD;DLDD;DLDH;E3;GCSL;LAD;PHE3
4086	R01221	1.8.1.4	TRUE	hsa00310	C00037 + C00101 + C00003 <=> C00143 + C00014 + C00011 + C00004 + C00080	C00037;C00101;C00003	C00143;C00014;C00011;C00004;C00080	DLD;DLDD;DLDH;E3;GCSL;LAD;PHE3
4087	R01698	1.8.1.4	TRUE	hsa00310	C00579 + C00003 <=> C00248 + C00004 + C00080	C00579;C00003	C00248;C00004;C00080	DLD;DLDD;DLDH;E3;GCSL;LAD;PHE3
4088	R01933	1.8.1.4	TRUE	hsa00310	C00322 + C00010 + C00003 <=> C00527 + C00011 + C00004 + C00080	C00322;C00010;C00003	C00527;C00011;C00004;C00080	DLD;DLDD;DLDH;E3;GCSL;LAD;PHE3
4089	R08549	1.8.1.4	TRUE	hsa00310	C00026 + C00010 + C00003 <=> C00091 + C00011 + C00004 + C00080	C00026;C00010;C00003	C00091;C00011;C00004;C00080	DLD;DLDD;DLDH;E3;GCSL;LAD;PHE3
Rid	EC	Irreversible	Pathway	Rid.1	C_in	C_out	Gene_symbol
303	R00432	6.2.1.4	TRUE	hsa00020	C00044 + C00042 + C00010 <=> C00035 + C00009 + C00091	C00044;C00042;C00010	C00035;C00009;C00091	SUCLG2;SUCLG1;SUCLA2
304	R00432	6.2.1.4	TRUE	hsa00640	C00044 + C00042 + C00010 <=> C00035 + C00009 + C00091	C00044;C00042;C00010	C00035;C00009;C00091	SUCLG2;SUCLG1;SUCLA2
305	R00432	6.2.1.4	TRUE	hsa01100	C00044 + C00042 + C00010 <=> C00035 + C00009 + C00091	C00044;C00042;C00010	C00035;C00009;C00091	SUCLG2;SUCLG1;SUCLA2
510	R00727	6.2.1.4	FALSE	hsa00020	C00081 + C00042 + C00010 <=> C00104 + C00009 + C00091	C00081;C00042;C00010	C00104;C00009;C00091	SUCLG2;SUCLG1;SUCLA2
511	R00727	6.2.1.4	FALSE	hsa01100	C00081 + C00042 + C00010 <=> C00104 + C00009 + C00091	C00081;C00042;C00010	C00104;C00009;C00091	SUCLG2;SUCLG1;SUCLA2
1560	R02405	6.2.1.4	FALSE		C00044 + C00490 + C00010 <=> C00035 + C00009 + C00531	C00044;C00490;C00010	C00035;C00009;C00531	SUCLG2;SUCLG1;SUCLA2
1561	R02406	6.2.1.4	FALSE		C00081 + C00490 + C00010 <=> C00104 + C00009 + C00531	C00081;C00490;C00010	C00104;C00009;C00531	SUCLG2;SUCLG1;SUCLA2
279	R00405	6.2.1.5	TRUE	hsa00020	C00002 + C00042 + C00010 <=> C00008 + C00009 + C00091	C00002;C00042;C00010	C00008;C00009;C00091	SUCLG2;SUCLG1;SUCLA2
280	R00405	6.2.1.5	TRUE	hsa00640	C00002 + C00042 + C00010 <=> C00008 + C00009 + C00091	C00002;C00042;C00010	C00008;C00009;C00091	SUCLG2;SUCLG1;SUCLA2
281	R00405	6.2.1.5	TRUE	hsa01100	C00002 + C00042 + C00010 <=> C00008 + C00009 + C00091	C00002;C00042;C00010	C00008;C00009;C00091	SUCLG2;SUCLG1;SUCLA2
Rid	EC	Irreversible	Pathway	Rid.1	C_in	C_out	Gene_symbol
1428	R02164	1.3.5.1	NA	hsa00020	C15602 + C00042 <=> C15603 + C00122	C15602;C00042	C15603;C00122	SDHA;SDHB
1429	R02164	1.3.5.1	NA	hsa01100	C15602 + C00042 <=> C15603 + C00122	C15602;C00042	C15603;C00122	SDHA;SDHB
Rid	EC	Irreversible	Pathway	Rid.1	C_in	C_out	Gene_symbol
752	R01082	4.2.1.2	TRUE	hsa00020	C00149 <=> C00122 + C00001	C00149	C00122;C00001	FH
753	R01082	4.2.1.2	TRUE	hsa00620	C00149 <=> C00122 + C00001	C00149	C00122;C00001	FH
754	R01082	4.2.1.2	TRUE	hsa01100	C00149 <=> C00122 + C00001	C00149	C00122;C00001	FH
Rid	EC	Irreversible	Pathway	Rid.1	C_in	C_out	Gene_symbol
233	R00342	1.1.1.37	TRUE	hsa00020	C00149 + C00003 <=> C00036 + C00004 + C00080	C00149;C00003	C00036;C00004;C00080	MDH1;MDH2
234	R00342	1.1.1.37	TRUE	hsa00620	C00149 + C00003 <=> C00036 + C00004 + C00080	C00149;C00003	C00036;C00004;C00080	MDH1;MDH2
235	R00342	1.1.1.37	TRUE	hsa00630	C00149 + C00003 <=> C00036 + C00004 + C00080	C00149;C00003	C00036;C00004;C00080	MDH1;MDH2
236	R00342	1.1.1.37	TRUE	hsa01100	C00149 + C00003 <=> C00036 + C00004 + C00080	C00149;C00003	C00036;C00004;C00080	MDH1;MDH2
3376	R07136	1.1.1.37	NA	hsa00270	C11537 + C00003 <=> C05528 + C00004 + C00080	C11537;C00003	C05528;C00004;C00080	MDH1;MDH2
Rid	EC	Irreversible	Pathway	Rid.1	C_in	C_out	Gene_symbol
237	R00344	6.4.1.1	TRUE	hsa00020	C00002 + C00022 + C00288 <=> C00008 + C00009 + C00036	C00002;C00022;C00288	C00008;C00009;C00036	PC
238	R00344	6.4.1.1	TRUE	hsa00620	C00002 + C00022 + C00288 <=> C00008 + C00009 + C00036	C00002;C00022;C00288	C00008;C00009;C00036	PC
239	R00344	6.4.1.1	TRUE	hsa01100	C00002 + C00022 + C00288 <=> C00008 + C00009 + C00036	C00002;C00022;C00288	C00008;C00009;C00036	PC
Rid	EC	Irreversible	Pathway	Rid.1	C_in	C_out	Gene_symbol
1029	R01513	1.1.1.95	TRUE	hsa00260	C00197 + C00003 <=> C03232 + C00004 + C00080	C00197;C00003	C03232;C00004;C00080	PHGDH
1030	R01513	1.1.1.95	TRUE	hsa01100	C00197 + C00003 <=> C03232 + C00004 + C00080	C00197;C00003	C03232;C00004;C00080	PHGDH
3669	R08198	1.1.1.95	TRUE		C02630 + C00003 <=> C00026 + C00004 + C00080	C02630;C00003	C00026;C00004;C00080	PHGDH
2292	R04173	2.6.1.52	TRUE	hsa00260	C01005 + C00026 <=> C03232 + C00025	C01005;C00026	C03232;C00025	PSAT1
2293	R04173	2.6.1.52	TRUE	hsa01100	C01005 + C00026 <=> C03232 + C00025	C01005;C00026	C03232;C00025	PSAT1
2789	R05085	2.6.1.52	FALSE	hsa00750	C06055 + C00026 <=> C06054 + C00025	C06055;C00026	C06054;C00025	PSAT1
2790	R05085	2.6.1.52	FALSE	hsa01100	C06055 + C00026 <=> C06054 + C00025	C06055;C00026	C06054;C00025	PSAT1
394	R00582	3.1.3.3	TRUE	hsa00260	C01005 + C00001 <=> C00065 + C00009	C01005;C00001	C00065;C00009	PSPH
395	R00582	3.1.3.3	TRUE	hsa01100	C01005 + C00001 <=> C00065 + C00009	C01005;C00001	C00065;C00009	PSPH
1782	R02853	3.1.3.3	TRUE		C02532 + C00001 <=> C00740 + C00009	C02532;C00001	C00740;C00009	PSPH
Rid	EC	Irreversible	Pathway	Rid.1	C_in	C_out	Gene_symbol
128	R00220	4.3.1.17	TRUE	hsa00260	C00065 <=> C00022 + C00014	C00065	C00022;C00014	SDS;SDSL
130	R00220	4.3.1.17	TRUE	hsa01100	C00065 <=> C00022 + C00014	C00065	C00022;C00014	SDS;SDSL
402	R00590	4.3.1.17	FALSE	hsa00270	C00065 <=> C02218 + C00001	C00065	C02218;C00001	SDS;SDSL
3130	R06131	4.3.1.17	FALSE		C05167 <=> C00161 + C00014	C05167	C00161;C00014	SDS
3822	R08698	4.3.1.17	FALSE		C02218 + C00001 <=> C00022 + C00014	C02218;C00001	C00022;C00014	SDS
129	R00220	4.3.1.19	FALSE	hsa00260	C00065 <=> C00022 + C00014	C00065	C00022;C00014	SDS;SDSL
131	R00220	4.3.1.19	FALSE	hsa01100	C00065 <=> C00022 + C00014	C00065	C00022;C00014	SDS;SDSL
686	R00996	4.3.1.19	TRUE	hsa00260	C00188 <=> C00109 + C00014	C00188	C00109;C00014	SDS;SDSL
687	R00996	4.3.1.19	TRUE	hsa00290	C00188 <=> C00109 + C00014	C00188	C00109;C00014	SDS;SDSL
688	R00996	4.3.1.19	TRUE	hsa01100	C00188 <=> C00109 + C00014	C00188	C00109;C00014	SDS;SDSL
Rid	EC	Irreversible	Pathway	Rid.1	C_in	C_out	Gene_symbol
588	R00891	4.2.1.22	FALSE	hsa00260	C00065 + C00283 <=> C00097 + C00001	C00065;C00283	C00097;C00001	CBS
913	R01289	4.2.1.22	FALSE		C00065 + C00155 <=> C00542 + C00001	C00065;C00155	C00542;C00001	CBS
914	R01290	4.2.1.22	TRUE	hsa00260	C00065 + C00155 <=> C02291 + C00001	C00065;C00155	C02291;C00001	CBS
915	R01290	4.2.1.22	TRUE	hsa00270	C00065 + C00155 <=> C02291 + C00001	C00065;C00155	C02291;C00001	CBS
916	R01290	4.2.1.22	TRUE	hsa01100	C00065 + C00155 <=> C02291 + C00001	C00065;C00155	C02291;C00001	CBS
2719	R04942	4.2.1.22	FALSE		C00065 + C05698 <=> C05699 + C00001	C00065;C05698	C05699;C00001	CBS
547	R00782	4.4.1.1	FALSE	hsa00270	C00097 + C00001 <=> C00283 + C00022 + C00014	C00097;C00001	C00283;C00022;C00014	CTH
548	R00782	4.4.1.1	FALSE	hsa01100	C00097 + C00001 <=> C00283 + C00022 + C00014	C00097;C00001	C00283;C00022;C00014	CTH
690	R01001	4.4.1.1	TRUE	hsa00260	C02291 + C00001 <=> C00097 + C00014 + C00109	C02291;C00001	C00097;C00014;C00109	CTH
691	R01001	4.4.1.1	TRUE	hsa00270	C02291 + C00001 <=> C00097 + C00014 + C00109	C02291;C00001	C00097;C00014;C00109	CTH
692	R01001	4.4.1.1	TRUE	hsa01100	C02291 + C00001 <=> C00097 + C00014 + C00109	C02291;C00001	C00097;C00014;C00109	CTH
1562	R02408	4.4.1.1	FALSE	hsa00270	C00491 + C00001 <=> C00022 + C00014 + C01962	C00491;C00001	C00022;C00014;C01962	CTH
2600	R04770	4.4.1.1	FALSE	hsa00450	C05335 + C00001 <=> C05703 + C00014 + C00109	C05335;C00001	C05703;C00014;C00109	CTH
2716	R04930	4.4.1.1	FALSE		C05699 + C00001 <=> C05688 + C00014 + C00109	C05699;C00001	C05688;C00014;C00109	CTH
3819	R08632	4.4.1.1	TRUE		C02291 <=> C00097 + C17234	C02291	C00097;C17234	CTH
3820	R08637	4.4.1.1	TRUE		C17234 + C00001 <=> C00109 + C00014	C17234;C00001	C00109;C00014	CTH
3919	R09366	4.4.1.1	NA	hsa00450	C05689 + C00001 <=> C00022 + C00014 + C05703	C05689;C00001	C00022;C00014;C05703	CTH
Rid	EC	Irreversible	Pathway	Rid.1	C_in	C_out	Gene_symbol
398	R00588	2.6.1.45	TRUE	hsa00260	C00065 + C00048 <=> C00168 + C00037	C00065;C00048	C00168;C00037	AGXT
399	R00588	2.6.1.45	TRUE	hsa00630	C00065 + C00048 <=> C00168 + C00037	C00065;C00048	C00168;C00037	AGXT
400	R00588	2.6.1.45	TRUE	hsa01100	C00065 + C00048 <=> C00168 + C00037	C00065;C00048	C00168;C00037	AGXT
644	R00945	2.1.2.1	TRUE	hsa00260	C00143 + C00037 + C00001 <=> C00101 + C00065	C00143;C00037;C00001	C00101;C00065	SHMT1;SHMT2
645	R00945	2.1.2.1	TRUE	hsa00460	C00143 + C00037 + C00001 <=> C00101 + C00065	C00143;C00037;C00001	C00101;C00065	SHMT1;SHMT2
646	R00945	2.1.2.1	TRUE	hsa00630	C00143 + C00037 + C00001 <=> C00101 + C00065	C00143;C00037;C00001	C00101;C00065	SHMT1;SHMT2
647	R00945	2.1.2.1	TRUE	hsa00670	C00143 + C00037 + C00001 <=> C00101 + C00065	C00143;C00037;C00001	C00101;C00065	SHMT1;SHMT2
648	R00945	2.1.2.1	TRUE	hsa01100	C00143 + C00037 + C00001 <=> C00101 + C00065	C00143;C00037;C00001	C00101;C00065	SHMT1;SHMT2
Rid	EC	Irreversible	Pathway	Rid.1	C_in	C_out	Gene_symbol
376	R00565	2.1.4.1	TRUE	hsa00260	C00062 + C00037 <=> C00077 + C00581	C00062;C00037	C00077;C00581	GATM
377	R00565	2.1.4.1	TRUE	hsa00330	C00062 + C00037 <=> C00077 + C00581	C00062;C00037	C00077;C00581	GATM
378	R00565	2.1.4.1	TRUE	hsa01100	C00062 + C00037 <=> C00077 + C00581	C00062;C00037	C00077;C00581	GATM
1323	R01989	2.1.4.1	FALSE	hsa00330	C00062 + C00334 <=> C00077 + C01035	C00062;C00334	C00077;C01035	GATM
1324	R01989	2.1.4.1	FALSE	hsa01100	C00062 + C00334 <=> C00077 + C01035	C00062;C00334	C00077;C01035	GATM
1257	R01883	2.1.1.2	TRUE	hsa00260	C00019 + C00581 <=> C00021 + C00300	C00019;C00581	C00021;C00300	GAMT
1258	R01883	2.1.1.2	TRUE	hsa00330	C00019 + C00581 <=> C00021 + C00300	C00019;C00581	C00021;C00300	GAMT
1259	R01883	2.1.1.2	TRUE	hsa01100	C00019 + C00581 <=> C00021 + C00300	C00019;C00581	C00021;C00300	GAMT
Rid	EC	Irreversible	Pathway	Rid.1	C_in	C_out	Gene_symbol
251	R00366	1.4.3.3	FALSE	hsa00260	C00037 + C00001 + C00007 <=> C00048 + C00014 + C00027	C00037;C00001;C00007	C00048;C00014;C00027	DAO
252	R00366	1.4.3.3	FALSE	hsa01100	C00037 + C00001 + C00007 <=> C00048 + C00014 + C00027	C00037;C00001;C00007	C00048;C00014;C00027	DAO
940	R01340	1.4.3.3	TRUE		C00405 + C00001 + C00007 <=> C00161 + C00014 + C00027	C00405;C00001;C00007	C00161;C00014;C00027	DAO
1567	R02457	1.4.3.3	FALSE	hsa00472	C00515 + C00001 + C00007 <=> C01110 + C00014 + C00027	C00515;C00001;C00007	C01110;C00014;C00027	DAO
1568	R02457	1.4.3.3	FALSE	hsa01100	C00515 + C00001 + C00007 <=> C01110 + C00014 + C00027	C00515;C00001;C00007	C01110;C00014;C00027	DAO
1807	R02894	1.4.3.3	FALSE	hsa00330	C00763 + C00007 <=> C03564 + C00027	C00763;C00007	C03564;C00027	DAO
1823	R02923	1.4.3.3	FALSE	hsa00472	C00792 + C00001 + C00007 <=> C03771 + C00014 + C00027	C00792;C00001;C00007	C03771;C00014;C00027	DAO
2313	R04221	1.4.3.3	FALSE	hsa00330	C03440 + C00007 <=> C04282 + C00027	C03440;C00007	C04282;C00027	DAO
2903	R05861	1.4.3.3	FALSE		C00133 + C00001 + C00007 <=> C00022 + C00014 + C00027	C00133;C00001;C00007	C00022;C00014;C00027	DAO
3125	R06124	1.4.3.3	FALSE		C05167 + C00001 + C00007 <=> C00161 + C00014 + C00027	C05167;C00001;C00007	C00161;C00014;C00027	DAO
254	R00369	2.6.1.44	TRUE	hsa00250	C00041 + C00048 <=> C00022 + C00037	C00041;C00048	C00022;C00037	AGXT;AGXT2
255	R00369	2.6.1.44	TRUE	hsa01100	C00041 + C00048 <=> C00022 + C00037	C00041;C00048	C00022;C00037	AGXT;AGXT2
257	R00372	2.6.1.44	FALSE	hsa00260	C00037 + C00026 <=> C00048 + C00025	C00037;C00026	C00048;C00025	AGXT;AGXT2
258	R00372	2.6.1.44	FALSE	hsa01100	C00037 + C00026 <=> C00048 + C00025	C00037;C00026	C00048;C00025	AGXT;AGXT2
Rid	EC	Irreversible	Pathway	Rid.1	C_in	C_out	Gene_symbol
713	R01025	1.1.99.1	TRUE	hsa00260	C00114 + C00028 <=> C00576 + C00030	C00114;C00028	C00576;C00030	CHDH
1635	R02565	1.2.1.8	TRUE	hsa00260	C00576 + C00003 + C00001 <=> C00719 + C00004 + 2 C00080	C00576;C00003;C00001	C00719;C00004;C00080	ALDH7A1
1636	R02565	1.2.1.8	TRUE	hsa01100	C00576 + C00003 + C00001 <=> C00719 + C00004 + 2 C00080	C00576;C00003;C00001	C00719;C00004;C00080	ALDH7A1
1637	R02566	1.2.1.8	FALSE	hsa00260	C00576 + C00006 + C00001 <=> C00719 + C00005 + 2 C00080	C00576;C00006;C00001	C00719;C00005;C00080	ALDH7A1
1638	R02566	1.2.1.8	FALSE	hsa01100	C00576 + C00006 + C00001 <=> C00719 + C00005 + 2 C00080	C00576;C00006;C00001	C00719;C00005;C00080	ALDH7A1
1763	R02821	2.1.1.5	TRUE	hsa00260	C00719 + C00155 <=> C01026 + C00073	C00719;C00155	C01026;C00073	BHMT
1764	R02821	2.1.1.5	TRUE	hsa00270	C00719 + C00155 <=> C01026 + C00073	C00719;C00155	C01026;C00073	BHMT
1765	R02821	2.1.1.5	TRUE	hsa01100	C00719 + C00155 <=> C01026 + C00073	C00719;C00155	C01026;C00073	BHMT
1061	R01565	1.5.8.4	NA	hsa00260	C01026 + C04253 + C00001 <=> C00213 + C00067 + C04570	C01026;C04253;C00001	C00213;C00067;C04570	DMGDH
1062	R01565	1.5.8.4	NA	hsa01100	C01026 + C04253 + C00001 <=> C00213 + C00067 + C04570	C01026;C04253;C00001	C00213;C00067;C04570	DMGDH
409	R00610	1.5.3.1	TRUE	hsa00260	C00213 + C00001 + C00007 <=> C00037 + C00067 + C00027	C00213;C00001;C00007	C00037;C00067;C00027	PIPOX
410	R00610	1.5.3.1	TRUE	hsa01100	C00213 + C00001 + C00007 <=> C00037 + C00067 + C00027	C00213;C00001;C00007	C00037;C00067;C00027	PIPOX
411	R00611	1.5.8.3	NA	hsa00260	C00213 + C04253 + C00001 <=> C00037 + C00067 + C04570	C00213;C04253;C00001	C00037;C00067;C04570	SARDH
412	R00611	1.5.8.3	NA	hsa01100	C00213 + C04253 + C00001 <=> C00037 + C00067 + C04570	C00213;C04253;C00001	C00037;C00067;C04570	SARDH
Rid	EC	Irreversible	Pathway	Rid.1	C_in	C_out	Gene_symbol
2034	R03425	1.4.4.2	TRUE	hsa00260	C00037 + C02051 <=> C01242 + C00011	C00037;C02051	C01242;C00011	GLDC
2035	R03425	1.4.4.2	TRUE	hsa01100	C00037 + C02051 <=> C01242 + C00011	C00037;C02051	C01242;C00011	GLDC
557	R00830	2.3.1.37	TRUE	hsa00260	C00091 + C00037 <=> C00430 + C00010 + C00011	C00091;C00037	C00430;C00010;C00011	ALAS1;ALAS2
558	R00830	2.3.1.37	TRUE	hsa00860	C00091 + C00037 <=> C00430 + C00010 + C00011	C00091;C00037	C00430;C00010;C00011	ALAS1;ALAS2
559	R00830	2.3.1.37	TRUE	hsa01100	C00091 + C00037 <=> C00430 + C00010 + C00011	C00091;C00037	C00430;C00010;C00011	ALAS1;ALAS2
256	R00371	2.3.1.29	TRUE	hsa00260	C00024 + C00037 <=> C00010 + C03508	C00024;C00037	C00010;C03508	GCAT
1232	R01853	1.4.3.4	TRUE		C00375 + C00001 + C00007 <=> C00071 + C00014 + C00027	C00375;C00001;C00007	C00071;C00014;C00027	MAOA;MAOB
1431	R02173	1.4.3.4	FALSE	hsa00380	C00398 + C00001 + C00007 <=> C00637 + C00014 + C00027	C00398;C00001;C00007	C00637;C00014;C00027	MAOA;MAOB
1552	R02382	1.4.3.4	FALSE	hsa00350	C00483 + C00001 + C00007 <=> C03765 + C00014 + C00027	C00483;C00001;C00007	C03765;C00014;C00027	MAOA;MAOB
1609	R02529	1.4.3.4	FALSE	hsa00260	C01888 + C00001 + C00007 <=> C00546 + C00014 + C00027	C01888;C00001;C00007	C00546;C00014;C00027	MAOA;MAOB
1613	R02532	1.4.3.4	FALSE	hsa00350	C00547 + C00001 + C00007 <=> C05577 + C00014 + C00027	C00547;C00001;C00007	C05577;C00014;C00027	MAOA;MAOB
1614	R02532	1.4.3.4	FALSE	hsa01100	C00547 + C00001 + C00007 <=> C05577 + C00014 + C00027	C00547;C00001;C00007	C05577;C00014;C00027	MAOA;MAOB
1666	R02613	1.4.3.4	FALSE	hsa00360	C05332 + C00007 + C00001 <=> C00601 + C00014 + C00027	C05332;C00007;C00001	C00601;C00014;C00027	MAOA;MAOB
1810	R02908	1.4.3.4	FALSE	hsa00380	C00780 + C00001 + C00007 <=> C05634 + C00014 + C00027	C00780;C00001;C00007	C05634;C00014;C00027	MAOA;MAOB
1811	R02908	1.4.3.4	FALSE	hsa01100	C00780 + C00001 + C00007 <=> C05634 + C00014 + C00027	C00780;C00001;C00007	C05634;C00014;C00027	MAOA;MAOB
1819	R02919	1.4.3.4	FALSE	hsa00350	C00788 + C00001 + C00007 <=> C05577 + C00218 + C00027	C00788;C00001;C00007	C05577;C00218;C00027	MAOA;MAOB
1820	R02919	1.4.3.4	FALSE	hsa01100	C00788 + C00001 + C00007 <=> C05577 + C00218 + C00027	C00788;C00001;C00007	C05577;C00218;C00027	MAOA;MAOB
2245	R04025	1.4.3.4	FALSE	hsa00330	C02714 + C00001 + C00007 <=> C05936 + C00014 + C00027	C02714;C00001;C00007	C05936;C00014;C00027	MAOA;MAOB
2246	R04025	1.4.3.4	FALSE	hsa01100	C02714 + C00001 + C00007 <=> C05936 + C00014 + C00027	C02714;C00001;C00007	C05936;C00014;C00027	MAOA;MAOB
2338	R04300	1.4.3.4	FALSE	hsa00350	C03758 + C00001 + C00007 <=> C04043 + C00014 + C00027	C03758;C00001;C00007	C04043;C00014;C00027	MAOA;MAOB
2340	R04300	1.4.3.4	FALSE	hsa01100	C03758 + C00001 + C00007 <=> C04043 + C00014 + C00027	C03758;C00001;C00007	C04043;C00014;C00027	MAOA;MAOB
2496	R04674	1.4.3.4	FALSE	hsa00340	C05127 + C00001 + C00007 <=> C05827 + C00014 + C00027	C05127;C00001;C00007	C05827;C00014;C00027	MAOA;MAOB
2692	R04890	1.4.3.4	FALSE	hsa00350	C05587 + C00001 + C00007 <=> C05581 + C00027 + C00014	C05587;C00001;C00007	C05581;C00027;C00014	MAOA;MAOB
2693	R04890	1.4.3.4	FALSE	hsa01100	C05587 + C00001 + C00007 <=> C05581 + C00027 + C00014	C05587;C00001;C00007	C05581;C00027;C00014	MAOA;MAOB
2698	R04893	1.4.3.4	FALSE	hsa00350	C05589 + C00001 + C00007 <=> C05583 + C00014 + C00027	C05589;C00001;C00007	C05583;C00014;C00027	MAOA;MAOB
2699	R04893	1.4.3.4	FALSE	hsa01100	C05589 + C00001 + C00007 <=> C05583 + C00014 + C00027	C05589;C00001;C00007	C05583;C00014;C00027	MAOA;MAOB
2700	R04894	1.4.3.4	FALSE	hsa00350	C05588 + C00001 + C00007 <=> C05583 + C00027 + C00218	C05588;C00001;C00007	C05583;C00027;C00218	MAOA;MAOB
2701	R04894	1.4.3.4	FALSE	hsa01100	C05588 + C00001 + C00007 <=> C05583 + C00027 + C00218	C05588;C00001;C00007	C05583;C00027;C00218	MAOA;MAOB
2707	R04907	1.4.3.4	FALSE	hsa00380	C05636 + C00007 <=> C05637 + C00014 + C00027	C05636;C00007	C05637;C00014;C00027	MAOA;MAOB
2708	R04908	1.4.3.4	NA	hsa00380	C05638 + C00001 + C00007 <=> C05639 + C00014 + C00027 + C00001	C05638;C00001;C00007	C05639;C00014;C00027;C00001	MAOA;MAOB
3132	R06133	1.4.3.4	FALSE		C00706 + C00001 + C00007 <=> C00071 + C00014 + C00027	C00706;C00001;C00007	C00071;C00014;C00027	MAOA;MAOB
3757	R08346	1.4.3.4	FALSE	hsa00982	C07572 + C00007 + C00001 <=> C16612 + C00543 + C00027	C07572;C00007;C00001	C16612;C00543;C00027	MAOA;MAOB
3758	R08347	1.4.3.4	FALSE	hsa00982	C16608 + C00007 + C00001 <=> C16612 + C00218 + C00027	C16608;C00007;C00001	C16612;C00218;C00027	MAOA;MAOB
3759	R08348	1.4.3.4	FALSE	hsa00982	C16609 + C00001 + C00007 <=> C16612 + C00014 + C00027	C16609;C00001;C00007	C16612;C00014;C00027	MAOA;MAOB
1233	R01853	1.4.3.21	TRUE		C00375 + C00001 + C00007 <=> C00071 + C00014 + C00027	C00375;C00001;C00007	C00071;C00014;C00027	AOC2;AOC3
1553	R02382	1.4.3.21	FALSE	hsa00350	C00483 + C00001 + C00007 <=> C03765 + C00014 + C00027	C00483;C00001;C00007	C03765;C00014;C00027	AOC2;AOC3
1610	R02529	1.4.3.21	FALSE	hsa00260	C01888 + C00001 + C00007 <=> C00546 + C00014 + C00027	C01888;C00001;C00007	C00546;C00014;C00027	AOC2;AOC3
1667	R02613	1.4.3.21	FALSE	hsa00360	C05332 + C00007 + C00001 <=> C00601 + C00014 + C00027	C05332;C00007;C00001	C00601;C00014;C00027	AOC2;AOC3
1892	R03139	1.4.3.21	FALSE	hsa00410	C00986 + C00007 + C00001 <=> C05665 + C00014 + C00027	C00986;C00007;C00001	C05665;C00014;C00027	AOC2;AOC3
2247	R04027	1.4.3.21	FALSE	hsa01100	C02723 + C00007 + C00080 <=> C06178 + C00027 + C00014	C02723;C00007;C00080	C06178;C00027;C00014	AOC2;AOC3
2339	R04300	1.4.3.21	FALSE	hsa00350	C03758 + C00001 + C00007 <=> C04043 + C00014 + C00027	C03758;C00001;C00007	C04043;C00014;C00027	AOC2;AOC3
2341	R04300	1.4.3.21	FALSE	hsa01100	C03758 + C00001 + C00007 <=> C04043 + C00014 + C00027	C03758;C00001;C00007	C04043;C00014;C00027	AOC2;AOC3
2831	R05334	1.4.3.21	FALSE		C02723 + C00007 + C00001 <=> C10974 + C00027 + C00014	C02723;C00007;C00001	C10974;C00027;C00014	AOC2;AOC3
3145	R06154	1.4.3.21	FALSE		C00218 + C00007 + C00001 <=> C00067 + C00014 + C00027	C00218;C00007;C00001	C00067;C00014;C00027	AOC2;AOC3
3239	R06740	1.4.3.21	FALSE	hsa01100	C01672 + C00001 + C00007 <=> C12455 + C00014 + C00027	C01672;C00001;C00007	C12455;C00014;C00027	AOC2;AOC3
Rid	EC	Irreversible	Pathway	Rid.1	C_in	C_out	Gene_symbol
337	R00497	6.3.2.3	TRUE	hsa00480	C00002 + C00669 + C00037 <=> C00008 + C00009 + C00051	C00002;C00669;C00037	C00008;C00009;C00051	GSS
338	R00497	6.3.2.3	TRUE	hsa01100	C00002 + C00669 + C00037 <=> C00008 + C00009 + C00051	C00002;C00669;C00037	C00008;C00009;C00051	GSS
Rid	EC	Irreversible	Pathway	Rid.1	C_in	C_out	Gene_symbol
4038	R00494	3.4.19.13	TRUE	hsa00480	C00051 + C00001 <=> C01419 + C00025	C00051;C00001	C01419;C00025	GGT6
599	R00899	3.4.11.2	FALSE	hsa00480	C01419 + C00001 <=> C00097 + C00037	C01419;C00001	C00097;C00037	ANPEP
601	R00899	3.4.11.2	FALSE	hsa01100	C01419 + C00001 <=> C00097 + C00037	C01419;C00001	C00097;C00037	ANPEP
2723	R04951	3.4.11.2	FALSE	hsa00480	C05729 + C00001 <=> C05726 + C00037	C05729;C00001	C05726;C00037	ANPEP
598	R00899	3.4.11.1	FALSE	hsa00480	C01419 + C00001 <=> C00097 + C00037	C01419;C00001	C00097;C00037	LAP3
600	R00899	3.4.11.1	FALSE	hsa01100	C01419 + C00001 <=> C00097 + C00037	C01419;C00001	C00097;C00037	LAP3
2722	R04951	3.4.11.1	FALSE	hsa00480	C05729 + C00001 <=> C05726 + C00037	C05729;C00001	C05726;C00037	LAP3
592	R00894	6.3.2.2	TRUE	hsa00480	C00002 + C00025 + C00097 <=> C00008 + C00009 + C00669	C00002;C00025;C00097	C00008;C00009;C00669	GCLC
593	R00894	6.3.2.2	TRUE	hsa01100	C00002 + C00025 + C00097 <=> C00008 + C00009 + C00669	C00002;C00025;C00097	C00008;C00009;C00669	GCLC
337	R00497	6.3.2.3	TRUE	hsa00480	C00002 + C00669 + C00037 <=> C00008 + C00009 + C00051	C00002;C00669;C00037	C00008;C00009;C00051	GSS
338	R00497	6.3.2.3	TRUE	hsa01100	C00002 + C00669 + C00037 <=> C00008 + C00009 + C00051	C00002;C00669;C00037	C00008;C00009;C00051	GSS
Rid	EC	Irreversible	Pathway	Rid.1	C_in	C_out	Gene_symbol
335	R00494	2.3.2.2	FALSE	hsa00480	C00051 + C00001 <=> C01419 + C00025	C00051;C00001	C01419;C00025	GGT6;GGT1;GGT7;GGT5
336	R00494	2.3.2.2	FALSE	hsa01100	C00051 + C00001 <=> C01419 + C00025	C00051;C00001	C01419;C00025	GGT6;GGT1;GGT7;GGT5
888	R01262	2.3.2.2	FALSE	hsa00480	C00051 + C00151 <=> C01419 + C03740	C00051;C00151	C01419;C03740	GGT6;GGT1;GGT7;GGT5
1124	R01687	2.3.2.2	NA	hsa00430	C03193 + C00245 <=> C00012 + C05844	C03193;C00245	C00012;C05844	GGT6;GGT1;GGT7;GGT5
2186	R03867	2.3.2.2	FALSE	hsa00590	C02166 + C00045 <=> C05951 + C03363	C02166;C00045	C05951;C03363	GGT6;GGT1;GGT7;GGT5
2187	R03867	2.3.2.2	FALSE	hsa01100	C02166 + C00045 <=> C05951 + C03363	C02166;C00045	C05951;C03363	GGT6;GGT1;GGT7;GGT5
2200	R03916	2.3.2.2	FALSE	hsa00480	C02320 + C00001 <=> C05729 + C00025	C02320;C00001	C05729;C00025	GGT6;GGT1;GGT7;GGT5
2214	R03970	2.3.2.2	FALSE	hsa00460	C02512 + C00025 <=> C05711 + C00001	C02512;C00025	C05711;C00001	GGT6;GGT1;GGT7;GGT5
2215	R03971	2.3.2.2	FALSE	hsa00460	C05670 + C00025 <=> C06114 + C00001	C05670;C00025	C06114;C00001	GGT6;GGT1;GGT7;GGT5
2283	R04159	2.3.2.2	NA		C03193 + C00045 <=> C00012 + C03363	C03193;C00045	C00012;C03363	GGT6;GGT1;GGT7;GGT5
2717	R04935	2.3.2.2	NA		C03193 + C05689 <=> C00012 + C05695	C03193;C05689	C00012;C05695	GGT6;GGT1;GGT7;GGT5
4039	R03749	4.3.2.9	TRUE	hsa00480	C03740 <=> C01879 + C00151	C03740	C01879;C00151	GGCT;C7orf24;CRF21;GCTG;GGC
164	R00251	3.5.2.9	TRUE	hsa00480	C00002 + C01879 + 2 C00001 <=> C00008 + C00009 + C00025	C00002;C01879;C00001	C00008;C00009;C00025	OPLAH
2066	R03522	2.5.1.18	TRUE	hsa00480	C01322 + C00051 <=> C00462 + C02320	C01322;C00051	C00462;C02320	GSTO2;GSTA5;GSTA1;GSTA2;GSTA3;GSTA4;GSTM1;GSTM2;GSTM3;GSTM4;GSTM5;GSTP1;GSTT1;GSTT2;GSTK1;MGST1;MGST2;MGST3;GSTT2B;GSTO1
3261	R07002	2.5.1.18	FALSE	hsa00980	C14786 + C00051 <=> C14791	C14786;C00051	C14791	GSTO2;GSTA5;GSTA1;GSTA2;GSTA3;GSTA4;GSTM1;GSTM2;GSTM3;GSTM4;GSTM5;GSTP1;GSTT1;GSTT2;GSTK1;MGST1;MGST2;MGST3;GSTT2B;GSTO1
3262	R07003	2.5.1.18	FALSE	hsa00980	C14787 + C00051 <=> C14793	C14787;C00051	C14793	GSTO2;GSTA5;GSTA1;GSTA2;GSTA3;GSTA4;GSTM1;GSTM2;GSTM3;GSTM4;GSTM5;GSTP1;GSTT1;GSTT2;GSTK1;MGST1;MGST2;MGST3;GSTT2B;GSTO1
3263	R07004	2.5.1.18	FALSE	hsa00980	C14787 + C00051 <=> C14792	C14787;C00051	C14792	GSTO2;GSTA5;GSTA1;GSTA2;GSTA3;GSTA4;GSTM1;GSTM2;GSTM3;GSTM4;GSTM5;GSTP1;GSTT1;GSTT2;GSTK1;MGST1;MGST2;MGST3;GSTT2B;GSTO1
3271	R07023	2.5.1.18	FALSE	hsa00980	C14802 + C00051 <=> C14803	C14802;C00051	C14803	GSTO2;GSTA5;GSTA1;GSTA2;GSTA3;GSTA4;GSTM1;GSTM2;GSTM3;GSTM4;GSTM5;GSTP1;GSTT1;GSTT2;GSTK1;MGST1;MGST2;MGST3;GSTT2B;GSTO1
3272	R07024	2.5.1.18	FALSE	hsa00980	C14802 + C00051 <=> C14804	C14802;C00051	C14804	GSTO2;GSTA5;GSTA1;GSTA2;GSTA3;GSTA4;GSTM1;GSTM2;GSTM3;GSTM4;GSTM5;GSTP1;GSTT1;GSTT2;GSTK1;MGST1;MGST2;MGST3;GSTT2B;GSTO1
3273	R07025	2.5.1.18	FALSE	hsa00980	C14800 + C00051 <=> C14805	C14800;C00051	C14805	GSTO2;GSTA5;GSTA1;GSTA2;GSTA3;GSTA4;GSTM1;GSTM2;GSTM3;GSTM4;GSTM5;GSTP1;GSTT1;GSTT2;GSTK1;MGST1;MGST2;MGST3;GSTT2B;GSTO1
3274	R07026	2.5.1.18	FALSE	hsa00980	C14800 + C00051 <=> C14806	C14800;C00051	C14806	GSTO2;GSTA5;GSTA1;GSTA2;GSTA3;GSTA4;GSTM1;GSTM2;GSTM3;GSTM4;GSTM5;GSTP1;GSTT1;GSTT2;GSTK1;MGST1;MGST2;MGST3;GSTT2B;GSTO1
3331	R07069	2.5.1.18	FALSE	hsa00980	C14839 + C00051 <=> C14847	C14839;C00051	C14847	GSTO2;GSTA5;GSTA1;GSTA2;GSTA3;GSTA4;GSTM1;GSTM2;GSTM3;GSTM4;GSTM5;GSTP1;GSTT1;GSTT2;GSTK1;MGST1;MGST2;MGST3;GSTT2B;GSTO1
3332	R07070	2.5.1.18	FALSE	hsa00980	C14840 + C00051 <=> C14848	C14840;C00051	C14848	GSTO2;GSTA5;GSTA1;GSTA2;GSTA3;GSTA4;GSTM1;GSTM2;GSTM3;GSTM4;GSTM5;GSTP1;GSTT1;GSTT2;GSTK1;MGST1;MGST2;MGST3;GSTT2B;GSTO1
3343	R07083	2.5.1.18	FALSE	hsa00980	C14851 + C00051 <=> C14855	C14851;C00051	C14855	GSTO2;GSTA5;GSTA1;GSTA2;GSTA3;GSTA4;GSTM1;GSTM2;GSTM3;GSTM4;GSTM5;GSTP1;GSTT1;GSTT2;GSTK1;MGST1;MGST2;MGST3;GSTT2B;GSTO1
3344	R07084	2.5.1.18	FALSE	hsa00980	C14852 + C00051 <=> C14856 + C00001	C14852;C00051	C14856;C00001	GSTO2;GSTA5;GSTA1;GSTA2;GSTA3;GSTA4;GSTM1;GSTM2;GSTM3;GSTM4;GSTM5;GSTP1;GSTT1;GSTT2;GSTK1;MGST1;MGST2;MGST3;GSTT2B;GSTO1
3352	R07091	2.5.1.18	FALSE	hsa00980	C14858 + C00051 <=> C14861	C14858;C00051	C14861	GSTO2;GSTA5;GSTA1;GSTA2;GSTA3;GSTA4;GSTM1;GSTM2;GSTM3;GSTM4;GSTM5;GSTP1;GSTT1;GSTT2;GSTK1;MGST1;MGST2;MGST3;GSTT2B;GSTO1
3353	R07092	2.5.1.18	FALSE	hsa00980	C14857 + C00051 <=> C14865 + C01327	C14857;C00051	C14865;C01327	GSTO2;GSTA5;GSTA1;GSTA2;GSTA3;GSTA4;GSTM1;GSTM2;GSTM3;GSTM4;GSTM5;GSTP1;GSTT1;GSTT2;GSTK1;MGST1;MGST2;MGST3;GSTT2B;GSTO1
3354	R07093	2.5.1.18	FALSE	hsa00980	C14859 + C00051 <=> C14864 + C01327	C14859;C00051	C14864;C01327	GSTO2;GSTA5;GSTA1;GSTA2;GSTA3;GSTA4;GSTM1;GSTM2;GSTM3;GSTM4;GSTM5;GSTP1;GSTT1;GSTT2;GSTK1;MGST1;MGST2;MGST3;GSTT2B;GSTO1
3355	R07094	2.5.1.18	FALSE	hsa00980	C14865 + C00051 <=> C14863 + C01327	C14865;C00051	C14863;C01327	GSTO2;GSTA5;GSTA1;GSTA2;GSTA3;GSTA4;GSTM1;GSTM2;GSTM3;GSTM4;GSTM5;GSTP1;GSTT1;GSTT2;GSTK1;MGST1;MGST2;MGST3;GSTT2B;GSTO1
3360	R07100	2.5.1.18	FALSE	hsa00980	C06790 + C00051 <=> C14868 + C01327	C06790;C00051	C14868;C01327	GSTO2;GSTA5;GSTA1;GSTA2;GSTA3;GSTA4;GSTM1;GSTM2;GSTM3;GSTM4;GSTM5;GSTP1;GSTT1;GSTT2;GSTK1;MGST1;MGST2;MGST3;GSTT2B;GSTO1
3374	R07113	2.5.1.18	FALSE	hsa00980	C11088 + C00051 + C00080 <=> C14874 + 2 C13645	C11088;C00051;C00080	C14874;C13645	GSTO2;GSTA5;GSTA1;GSTA2;GSTA3;GSTA4;GSTM1;GSTM2;GSTM3;GSTM4;GSTM5;GSTP1;GSTT1;GSTT2;GSTK1;MGST1;MGST2;MGST3;GSTT2B;GSTO1
3375	R07116	2.5.1.18	FALSE	hsa00980	C14870 + C00051 <=> C14871 + C13645	C14870;C00051	C14871;C13645	GSTO2;GSTA5;GSTA1;GSTA2;GSTA3;GSTA4;GSTM1;GSTM2;GSTM3;GSTM4;GSTM5;GSTP1;GSTT1;GSTT2;GSTK1;MGST1;MGST2;MGST3;GSTT2B;GSTO1
3723	R08280	2.5.1.18	FALSE	hsa00982	C07645 + C00051 <=> C11583 + C00001	C07645;C00051	C11583;C00001	GSTO2;GSTA5;GSTA1;GSTA2;GSTA3;GSTA4;GSTM1;GSTM2;GSTM3;GSTM4;GSTM5;GSTP1;GSTT1;GSTT2;GSTK1;MGST1;MGST2;MGST3;GSTT2B;GSTO1
3791	R08511	2.5.1.18	TRUE		C00726 + C00051 <=> C01326 + C02320	C00726;C00051	C01326;C02320	GSTO2;GSTA5;GSTA1;GSTA2;GSTA3;GSTA4;GSTM1;GSTM2;GSTM3;GSTM4;GSTM5;GSTP1;GSTT1;GSTT2;GSTK1;MGST1;MGST2;MGST3;GSTT2B;GSTO1
3792	R08512	2.5.1.18	TRUE		C16738 + C00051 <=> C00059 + C02320	C16738;C00051	C00059;C02320	GSTO2;GSTA5;GSTA1;GSTA2;GSTA3;GSTA4;GSTM1;GSTM2;GSTM3;GSTM4;GSTM5;GSTP1;GSTT1;GSTT2;GSTK1;MGST1;MGST2;MGST3;GSTT2B;GSTO1
3936	R09409	2.5.1.18	FALSE	hsa00980	C19586 + C00051 <=> C11278	C19586;C00051	C11278	GSTO2;GSTA5;GSTA1;GSTA2;GSTA3;GSTA4;GSTM1;GSTM2;GSTM3;GSTM4;GSTM5;GSTP1;GSTT1;GSTT2;GSTK1;MGST1;MGST2;MGST3;GSTT2B;GSTO1
4038	R00494	3.4.19.13	TRUE	hsa00480	C00051 + C00001 <=> C01419 + C00025	C00051;C00001	C01419;C00025	GGT6
Rid	EC	Irreversible	Pathway	Rid.1	C_in	C_out	Gene_symbol
592	R00894	6.3.2.2	TRUE	hsa00480	C00002 + C00025 + C00097 <=> C00008 + C00009 + C00669	C00002;C00025;C00097	C00008;C00009;C00669	GCLC
593	R00894	6.3.2.2	TRUE	hsa01100	C00002 + C00025 + C00097 <=> C00008 + C00009 + C00669	C00002;C00025;C00097	C00008;C00009;C00669	GCLC
337	R00497	6.3.2.3	TRUE	hsa00480	C00002 + C00669 + C00037 <=> C00008 + C00009 + C00051	C00002;C00669;C00037	C00008;C00009;C00051	GSS
338	R00497	6.3.2.3	TRUE	hsa01100	C00002 + C00669 + C00037 <=> C00008 + C00009 + C00051	C00002;C00669;C00037	C00008;C00009;C00051	GSS
Rid	EC	Irreversible	Pathway	Rid.1	C_in	C_out	Gene_symbol
128	R00220	4.3.1.17	TRUE	hsa00260	C00065 <=> C00022 + C00014	C00065	C00022;C00014	SDS;SDSL
130	R00220	4.3.1.17	TRUE	hsa01100	C00065 <=> C00022 + C00014	C00065	C00022;C00014	SDS;SDSL
402	R00590	4.3.1.17	FALSE	hsa00270	C00065 <=> C02218 + C00001	C00065	C02218;C00001	SDS;SDSL
3130	R06131	4.3.1.17	FALSE		C05167 <=> C00161 + C00014	C05167	C00161;C00014	SDS
3822	R08698	4.3.1.17	FALSE		C02218 + C00001 <=> C00022 + C00014	C02218;C00001	C00022;C00014	SDS
Rid	EC	Irreversible	Pathway	Rid.1	C_in	C_out	Gene_symbol
588	R00891	4.2.1.22	FALSE	hsa00260	C00065 + C00283 <=> C00097 + C00001	C00065;C00283	C00097;C00001	CBS
913	R01289	4.2.1.22	FALSE		C00065 + C00155 <=> C00542 + C00001	C00065;C00155	C00542;C00001	CBS
914	R01290	4.2.1.22	TRUE	hsa00260	C00065 + C00155 <=> C02291 + C00001	C00065;C00155	C02291;C00001	CBS
915	R01290	4.2.1.22	TRUE	hsa00270	C00065 + C00155 <=> C02291 + C00001	C00065;C00155	C02291;C00001	CBS
916	R01290	4.2.1.22	TRUE	hsa01100	C00065 + C00155 <=> C02291 + C00001	C00065;C00155	C02291;C00001	CBS
2719	R04942	4.2.1.22	FALSE		C00065 + C05698 <=> C05699 + C00001	C00065;C05698	C05699;C00001	CBS
2068	R03528	4.4.1.13	TRUE		C02882 + C00001 <=> C01336 + C00014 + C00022	C02882;C00001	C01336;C00014;C00022	CCBL2;CCBL1
3920	R09366	4.4.1.13	NA	hsa00450	C05689 + C00001 <=> C00022 + C00014 + C05703	C05689;C00001	C00022;C00014;C05703	CCBL2;CCBL1
4040	R01286	4.4.1.13	TRUE	hsa00270	C02291 + C00001 <=> C00155 + C00014 + C00022	C02291;C00001	C00155;C00014;C00022	KYAT3;CCBL2;KAT3;KATIII
4042	R00782	4.4.1.13	FALSE	hsa00270	C00097 + C00001 <=> C00283 + C00022 + C00014	C00097;C00001	C00283;C00022;C00014	KYAT3;CCBL2;KAT3;KATIII
1763	R02821	2.1.1.5	TRUE	hsa00260	C00719 + C00155 <=> C01026 + C00073	C00719;C00155	C01026;C00073	BHMT
1764	R02821	2.1.1.5	TRUE	hsa00270	C00719 + C00155 <=> C01026 + C00073	C00719;C00155	C01026;C00073	BHMT
1765	R02821	2.1.1.5	TRUE	hsa01100	C00719 + C00155 <=> C01026 + C00073	C00719;C00155	C01026;C00073	BHMT
4041	R11063	2.1.1.10	TRUE	hsa00270	C03172 + C00155 <=> 2 C00073	C03172;C00155	C00073	BHMT2
649	R00946	2.1.1.13	TRUE	hsa00270	C00440 + C00155 <=> C00101 + C00073	C00440;C00155	C00101;C00073	MTR
650	R00946	2.1.1.13	TRUE	hsa00670	C00440 + C00155 <=> C00101 + C00073	C00440;C00155	C00101;C00073	MTR
651	R00946	2.1.1.13	TRUE	hsa01100	C00440 + C00155 <=> C00101 + C00073	C00440;C00155	C00101;C00073	MTR
3918	R09365	2.1.1.13	FALSE	hsa00450	C05698 + C04489 <=> C05335 + C04144	C05698;C04489	C05335;C04144	MTR
Rid	EC	Irreversible	Pathway	Rid.1	C_in	C_out	Gene_symbol
547	R00782	4.4.1.1	FALSE	hsa00270	C00097 + C00001 <=> C00283 + C00022 + C00014	C00097;C00001	C00283;C00022;C00014	CTH
548	R00782	4.4.1.1	FALSE	hsa01100	C00097 + C00001 <=> C00283 + C00022 + C00014	C00097;C00001	C00283;C00022;C00014	CTH
690	R01001	4.4.1.1	TRUE	hsa00260	C02291 + C00001 <=> C00097 + C00014 + C00109	C02291;C00001	C00097;C00014;C00109	CTH
691	R01001	4.4.1.1	TRUE	hsa00270	C02291 + C00001 <=> C00097 + C00014 + C00109	C02291;C00001	C00097;C00014;C00109	CTH
692	R01001	4.4.1.1	TRUE	hsa01100	C02291 + C00001 <=> C00097 + C00014 + C00109	C02291;C00001	C00097;C00014;C00109	CTH
1562	R02408	4.4.1.1	FALSE	hsa00270	C00491 + C00001 <=> C00022 + C00014 + C01962	C00491;C00001	C00022;C00014;C01962	CTH
2600	R04770	4.4.1.1	FALSE	hsa00450	C05335 + C00001 <=> C05703 + C00014 + C00109	C05335;C00001	C05703;C00014;C00109	CTH
2716	R04930	4.4.1.1	FALSE		C05699 + C00001 <=> C05688 + C00014 + C00109	C05699;C00001	C05688;C00014;C00109	CTH
3819	R08632	4.4.1.1	TRUE		C02291 <=> C00097 + C17234	C02291	C00097;C17234	CTH
3820	R08637	4.4.1.1	TRUE		C17234 + C00001 <=> C00109 + C00014	C17234;C00001	C00109;C00014	CTH
3919	R09366	4.4.1.1	NA	hsa00450	C05689 + C00001 <=> C00022 + C00014 + C05703	C05689;C00001	C00022;C00014;C05703	CTH
2068	R03528	4.4.1.13	TRUE		C02882 + C00001 <=> C01336 + C00014 + C00022	C02882;C00001	C01336;C00014;C00022	CCBL2;CCBL1
3920	R09366	4.4.1.13	NA	hsa00450	C05689 + C00001 <=> C00022 + C00014 + C05703	C05689;C00001	C00022;C00014;C05703	CCBL2;CCBL1
4040	R01286	4.4.1.13	TRUE	hsa00270	C02291 + C00001 <=> C00155 + C00014 + C00022	C02291;C00001	C00155;C00014;C00022	KYAT3;CCBL2;KAT3;KATIII
4042	R00782	4.4.1.13	FALSE	hsa00270	C00097 + C00001 <=> C00283 + C00022 + C00014	C00097;C00001	C00283;C00022;C00014	KYAT3;CCBL2;KAT3;KATIII
246	R00355	2.6.1.1	TRUE	hsa00250	C00049 + C00026 <=> C00036 + C00025	C00049;C00026	C00036;C00025	GOT1;GOT2
247	R00355	2.6.1.1	TRUE	hsa01100	C00049 + C00026 <=> C00036 + C00025	C00049;C00026	C00036;C00025	GOT1;GOT2
458	R00694	2.6.1.1	FALSE	hsa00360	C00079 + C00026 <=> C00166 + C00025	C00079;C00026	C00166;C00025	GOT1;GOT2
460	R00694	2.6.1.1	FALSE	hsa00400	C00079 + C00026 <=> C00166 + C00025	C00079;C00026	C00166;C00025	GOT1;GOT2
462	R00694	2.6.1.1	FALSE	hsa01100	C00079 + C00026 <=> C00166 + C00025	C00079;C00026	C00166;C00025	GOT1;GOT2
518	R00734	2.6.1.1	FALSE	hsa00350	C00082 + C00026 <=> C01179 + C00025	C00082;C00026	C01179;C00025	GOT1;GOT2
520	R00734	2.6.1.1	FALSE	hsa00400	C00082 + C00026 <=> C01179 + C00025	C00082;C00026	C01179;C00025	GOT1;GOT2
522	R00734	2.6.1.1	FALSE	hsa01100	C00082 + C00026 <=> C01179 + C00025	C00082;C00026	C01179;C00025	GOT1;GOT2
594	R00895	2.6.1.1	FALSE	hsa00270	C00097 + C00026 <=> C00957 + C00025	C00097;C00026	C00957;C00025	GOT1;GOT2
595	R00895	2.6.1.1	FALSE	hsa01100	C00097 + C00026 <=> C00957 + C00025	C00097;C00026	C00957;C00025	GOT1;GOT2
596	R00896	2.6.1.1	FALSE	hsa00270	C00097 + C00026 <=> C00957 + C00302	C00097;C00026	C00957;C00302	GOT1;GOT2
597	R00896	2.6.1.1	FALSE	hsa01100	C00097 + C00026 <=> C00957 + C00302	C00097;C00026	C00957;C00302	GOT1;GOT2
1566	R02433	2.6.1.1	FALSE	hsa00270	C00506 + C00026 <=> C05528 + C00025	C00506;C00026	C05528;C00025	GOT1;GOT2
1669	R02619	2.6.1.1	FALSE	hsa00270	C00606 + C00026 <=> C05527 + C00025	C00606;C00026	C05527;C00025	GOT1;GOT2
1670	R02619	2.6.1.1	FALSE	hsa01100	C00606 + C00026 <=> C05527 + C00025	C00606;C00026	C05527;C00025	GOT1;GOT2
2780	R05052	2.6.1.1	FALSE	hsa00330	C05947 + C00026 <=> C05946 + C00025	C05947;C00026	C05946;C00025	GOT1;GOT2
2781	R05052	2.6.1.1	FALSE	hsa01100	C05947 + C00026 <=> C05946 + C00025	C05947;C00026	C05946;C00025	GOT1;GOT2
1886	R03105	2.8.1.2	FALSE	hsa00270	C00957 + C00094 <=> C00320 + C00022	C00957;C00094	C00320;C00022	MPST;TST
1887	R03105	2.8.1.2	FALSE	hsa01100	C00957 + C00094 <=> C00320 + C00022	C00957;C00094	C00320;C00022	MPST;TST
1888	R03106	2.8.1.2	TRUE		C01326 + C00957 <=> C01755 + C00022	C01326;C00957	C01755;C00022	MPST;TST
589	R00893	1.13.11.20	TRUE	hsa00270	C00097 + C00007 <=> C00606	C00097;C00007	C00606	CDO1
590	R00893	1.13.11.20	TRUE	hsa00430	C00097 + C00007 <=> C00606	C00097;C00007	C00606	CDO1
591	R00893	1.13.11.20	TRUE	hsa01100	C00097 + C00007 <=> C00606	C00097;C00007	C00606	CDO1
Rid	EC	Irreversible	Pathway	Rid.1	C_in	C_out	Gene_symbol
89	R00177	2.5.1.6	TRUE	hsa00270	C00009 + C00013 + C00019 <=> C00002 + C00073 + C00001	C00009;C00013;C00019	C00002;C00073;C00001	MAT2B;MAT1A;MAT2A
90	R00177	2.5.1.6	TRUE	hsa01100	C00009 + C00013 + C00019 <=> C00002 + C00073 + C00001	C00009;C00013;C00019	C00002;C00073;C00001	MAT2B;MAT1A;MAT2A
2601	R04771	2.5.1.6	FALSE		C00002 + C05335 + C00001 <=> C00009 + C00013 + C05691	C00002;C05335;C00001	C00009;C00013;C05691	MAT2B;MAT1A;MAT2A
270	R00380	2.1.1.37	NA		C00019 + C00039 <=> C00021 + C02967	C00019;C00039	C00021;C02967	DNMT1;DNMT3A;DNMT3B;DNMT3L
2670	R04858	2.1.1.37	NA	hsa00270	C00019 + C00856 <=> C00021 + C02967	C00019;C00856	C00021;C02967	DNMT1;DNMT3A;DNMT3B
2671	R04858	2.1.1.37	NA	hsa01100	C00019 + C00856 <=> C00021 + C02967	C00019;C00856	C00021;C02967	DNMT1;DNMT3A;DNMT3B
112	R00192	3.3.1.1	TRUE	hsa00270	C00021 + C00001 <=> C00212 + C00155	C00021;C00001	C00212;C00155	AHCYL1;AHCY;AHCYL2
113	R00192	3.3.1.1	TRUE	hsa01100	C00021 + C00001 <=> C00212 + C00155	C00021;C00001	C00212;C00155	AHCYL1;AHCY;AHCYL2
2718	R04936	3.3.1.1	FALSE		C05692 + C00001 <=> C00212 + C05698	C05692;C00001	C00212;C05698	AHCYL1;AHCY;AHCYL2
588	R00891	4.2.1.22	FALSE	hsa00260	C00065 + C00283 <=> C00097 + C00001	C00065;C00283	C00097;C00001	CBS
913	R01289	4.2.1.22	FALSE		C00065 + C00155 <=> C00542 + C00001	C00065;C00155	C00542;C00001	CBS
914	R01290	4.2.1.22	TRUE	hsa00260	C00065 + C00155 <=> C02291 + C00001	C00065;C00155	C02291;C00001	CBS
915	R01290	4.2.1.22	TRUE	hsa00270	C00065 + C00155 <=> C02291 + C00001	C00065;C00155	C02291;C00001	CBS
916	R01290	4.2.1.22	TRUE	hsa01100	C00065 + C00155 <=> C02291 + C00001	C00065;C00155	C02291;C00001	CBS
2719	R04942	4.2.1.22	FALSE		C00065 + C05698 <=> C05699 + C00001	C00065;C05698	C05699;C00001	CBS
547	R00782	4.4.1.1	FALSE	hsa00270	C00097 + C00001 <=> C00283 + C00022 + C00014	C00097;C00001	C00283;C00022;C00014	CTH
548	R00782	4.4.1.1	FALSE	hsa01100	C00097 + C00001 <=> C00283 + C00022 + C00014	C00097;C00001	C00283;C00022;C00014	CTH
690	R01001	4.4.1.1	TRUE	hsa00260	C02291 + C00001 <=> C00097 + C00014 + C00109	C02291;C00001	C00097;C00014;C00109	CTH
691	R01001	4.4.1.1	TRUE	hsa00270	C02291 + C00001 <=> C00097 + C00014 + C00109	C02291;C00001	C00097;C00014;C00109	CTH
692	R01001	4.4.1.1	TRUE	hsa01100	C02291 + C00001 <=> C00097 + C00014 + C00109	C02291;C00001	C00097;C00014;C00109	CTH
1562	R02408	4.4.1.1	FALSE	hsa00270	C00491 + C00001 <=> C00022 + C00014 + C01962	C00491;C00001	C00022;C00014;C01962	CTH
2600	R04770	4.4.1.1	FALSE	hsa00450	C05335 + C00001 <=> C05703 + C00014 + C00109	C05335;C00001	C05703;C00014;C00109	CTH
2716	R04930	4.4.1.1	FALSE		C05699 + C00001 <=> C05688 + C00014 + C00109	C05699;C00001	C05688;C00014;C00109	CTH
3819	R08632	4.4.1.1	TRUE		C02291 <=> C00097 + C17234	C02291	C00097;C17234	CTH
3820	R08637	4.4.1.1	TRUE		C17234 + C00001 <=> C00109 + C00014	C17234;C00001	C00109;C00014	CTH
3919	R09366	4.4.1.1	NA	hsa00450	C05689 + C00001 <=> C00022 + C00014 + C05703	C05689;C00001	C00022;C00014;C05703	CTH
Rid	EC	Irreversible	Pathway	Rid.1	C_in	C_out	Gene_symbol
89	R00177	2.5.1.6	TRUE	hsa00270	C00009 + C00013 + C00019 <=> C00002 + C00073 + C00001	C00009;C00013;C00019	C00002;C00073;C00001	MAT2B;MAT1A;MAT2A
90	R00177	2.5.1.6	TRUE	hsa01100	C00009 + C00013 + C00019 <=> C00002 + C00073 + C00001	C00009;C00013;C00019	C00002;C00073;C00001	MAT2B;MAT1A;MAT2A
2601	R04771	2.5.1.6	FALSE		C00002 + C05335 + C00001 <=> C00009 + C00013 + C05691	C00002;C05335;C00001	C00009;C00013;C05691	MAT2B;MAT1A;MAT2A
91	R00178	4.1.1.50	TRUE	hsa00270	C00019 + C00080 <=> C01137 + C00011	C00019;C00080	C01137;C00011	AMD1
92	R00178	4.1.1.50	TRUE	hsa00330	C00019 + C00080 <=> C01137 + C00011	C00019;C00080	C01137;C00011	AMD1
93	R00178	4.1.1.50	TRUE	hsa01100	C00019 + C00080 <=> C01137 + C00011	C00019;C00080	C01137;C00011	AMD1
1274	R01920	2.5.1.16	TRUE	hsa00270	C01137 + C00134 <=> C00170 + C00315	C01137;C00134	C00170;C00315	SRM
1275	R01920	2.5.1.16	TRUE	hsa00330	C01137 + C00134 <=> C00170 + C00315	C01137;C00134	C00170;C00315	SRM
1276	R01920	2.5.1.16	TRUE	hsa00480	C01137 + C00134 <=> C00170 + C00315	C01137;C00134	C00170;C00315	SRM
1277	R01920	2.5.1.16	TRUE	hsa01100	C01137 + C00134 <=> C00170 + C00315	C01137;C00134	C00170;C00315	SRM
1786	R02869	2.5.1.16	FALSE	hsa00270	C01137 + C00315 <=> C00170 + C00750	C01137;C00315	C00170;C00750	SRM
1788	R02869	2.5.1.16	FALSE	hsa00330	C01137 + C00315 <=> C00170 + C00750	C01137;C00315	C00170;C00750	SRM
1790	R02869	2.5.1.16	FALSE	hsa00410	C01137 + C00315 <=> C00170 + C00750	C01137;C00315	C00170;C00750	SRM
1792	R02869	2.5.1.16	FALSE	hsa00480	C01137 + C00315 <=> C00170 + C00750	C01137;C00315	C00170;C00750	SRM
1794	R02869	2.5.1.16	FALSE	hsa01100	C01137 + C00315 <=> C00170 + C00750	C01137;C00315	C00170;C00750	SRM
3761	R08359	2.5.1.16	FALSE	hsa00480	C01137 + C01672 <=> C00170 + C16565	C01137;C01672	C00170;C16565	SRM
1787	R02869	2.5.1.22	TRUE	hsa00270	C01137 + C00315 <=> C00170 + C00750	C01137;C00315	C00170;C00750	SMS
1789	R02869	2.5.1.22	TRUE	hsa00330	C01137 + C00315 <=> C00170 + C00750	C01137;C00315	C00170;C00750	SMS
1791	R02869	2.5.1.22	TRUE	hsa00410	C01137 + C00315 <=> C00170 + C00750	C01137;C00315	C00170;C00750	SMS
1793	R02869	2.5.1.22	TRUE	hsa00480	C01137 + C00315 <=> C00170 + C00750	C01137;C00315	C00170;C00750	SMS
1795	R02869	2.5.1.22	TRUE	hsa01100	C01137 + C00315 <=> C00170 + C00750	C01137;C00315	C00170;C00750	SMS
992	R01402	2.4.2.28	TRUE	hsa00270	C00170 + C00009 <=> C00147 + C04188	C00170;C00009	C00147;C04188	MTAP
993	R01402	2.4.2.28	TRUE	hsa01100	C00170 + C00009 <=> C00147 + C04188	C00170;C00009	C00147;C04188	MTAP
2390	R04420	5.3.1.23	TRUE	hsa00270	C04188 <=> C04582	C04188	C04582	MRI1
2391	R04420	5.3.1.23	TRUE	hsa01100	C04188 <=> C04582	C04188	C04582	MRI1
3453	R07392	4.2.1.109	TRUE	hsa00270	C04582 <=> C15650 + C00001	C04582	C15650;C00001	APIP
3454	R07392	4.2.1.109	TRUE	hsa01100	C04582 <=> C15650 + C00001	C04582	C15650;C00001	APIP
3455	R07393	3.1.3.77	TRUE	hsa00270	C15650 <=> C15651	C15650	C15651	ENOPH1
3456	R07393	3.1.3.77	TRUE	hsa01100	C15650 <=> C15651	C15650	C15651	ENOPH1
3457	R07394	3.1.3.77	TRUE	hsa00270	C15651 + C00001 <=> C15606 + C00009	C15651;C00001	C15606;C00009	ENOPH1
3458	R07394	3.1.3.77	TRUE	hsa01100	C15651 + C00001 <=> C15606 + C00009	C15651;C00001	C15606;C00009	ENOPH1
3459	R07395	3.1.3.77	TRUE	hsa00270	C15650 + C00001 <=> C15606 + C00009	C15650;C00001	C15606;C00009	ENOPH1
3460	R07395	3.1.3.77	TRUE	hsa01100	C15650 + C00001 <=> C15606 + C00009	C15650;C00001	C15606;C00009	ENOPH1
3431	R07363	1.13.11.53	TRUE	hsa00270	C15606 + C00007 <=> C08276 + C00058 + C00237	C15606;C00007	C08276;C00058;C00237	ADI1
3432	R07363	1.13.11.53	TRUE	hsa01100	C15606 + C00007 <=> C08276 + C00058 + C00237	C15606;C00007	C08276;C00058;C00237	ADI1
3433	R07364	1.13.11.54	TRUE	hsa00270	C15606 + C00007 <=> C01180 + C00058	C15606;C00007	C01180;C00058	ADI1
3434	R07364	1.13.11.54	TRUE	hsa01100	C15606 + C00007 <=> C01180 + C00058	C15606;C00007	C01180;C00058	ADI1
248	R00357	1.4.3.2	FALSE	hsa00250	C00049 + C00001 + C00007 <=> C00036 + C00014 + C00027	C00049;C00001;C00007	C00036;C00014;C00027	IL4I1
249	R00357	1.4.3.2	FALSE	hsa01100	C00049 + C00001 + C00007 <=> C00036 + C00014 + C00027	C00049;C00001;C00007	C00036;C00014;C00027	IL4I1
432	R00648	1.4.3.2	FALSE	hsa00270	C00073 + C00001 + C00007 <=> C01180 + C00014 + C00027	C00073;C00001;C00007	C01180;C00014;C00027	IL4I1
433	R00648	1.4.3.2	FALSE	hsa01100	C00073 + C00001 + C00007 <=> C01180 + C00014 + C00027	C00073;C00001;C00007	C01180;C00014;C00027	IL4I1
447	R00677	1.4.3.2	FALSE	hsa00380	C00078 + C00001 + C00007 <=> C00331 + C00014 + C00027	C00078;C00001;C00007	C00331;C00014;C00027	IL4I1
448	R00677	1.4.3.2	FALSE	hsa01100	C00078 + C00001 + C00007 <=> C00331 + C00014 + C00027	C00078;C00001;C00007	C00331;C00014;C00027	IL4I1
455	R00689	1.4.3.2	FALSE	hsa00360	C00079 + C00001 + C00007 <=> C00166 + C00014 + C00027	C00079;C00001;C00007	C00166;C00014;C00027	IL4I1
456	R00689	1.4.3.2	FALSE	hsa00400	C00079 + C00001 + C00007 <=> C00166 + C00014 + C00027	C00079;C00001;C00007	C00166;C00014;C00027	IL4I1
457	R00689	1.4.3.2	FALSE	hsa01100	C00079 + C00001 + C00007 <=> C00166 + C00014 + C00027	C00079;C00001;C00007	C00166;C00014;C00027	IL4I1
512	R00729	1.4.3.2	FALSE	hsa00350	C00082 + C00001 + C00007 <=> C01179 + C00014 + C00027	C00082;C00001;C00007	C01179;C00014;C00027	IL4I1
513	R00729	1.4.3.2	FALSE	hsa00400	C00082 + C00001 + C00007 <=> C01179 + C00014 + C00027	C00082;C00001;C00007	C01179;C00014;C00027	IL4I1
514	R00729	1.4.3.2	FALSE	hsa01100	C00082 + C00001 + C00007 <=> C01179 + C00014 + C00027	C00082;C00001;C00007	C01179;C00014;C00027	IL4I1
886	R01259	1.4.3.2	TRUE		C00151 + C00001 + C00007 <=> C00161 + C00014 + C00027	C00151;C00001;C00007	C00161;C00014;C00027	IL4I1
1439	R02197	1.4.3.2	FALSE	hsa00280	C00407 + C00001 + C00007 <=> C00671 + C00014 + C00027	C00407;C00001;C00007	C00671;C00014;C00027	IL4I1
1440	R02197	1.4.3.2	FALSE	hsa01100	C00407 + C00001 + C00007 <=> C00671 + C00014 + C00027	C00407;C00001;C00007	C00671;C00014;C00027	IL4I1
3124	R06124	1.4.3.2	FALSE		C05167 + C00001 + C00007 <=> C00161 + C00014 + C00027	C05167;C00001;C00007	C00161;C00014;C00027	IL4I1
459	R00694	2.6.1.5	FALSE	hsa00360	C00079 + C00026 <=> C00166 + C00025	C00079;C00026	C00166;C00025	TAT
461	R00694	2.6.1.5	FALSE	hsa00400	C00079 + C00026 <=> C00166 + C00025	C00079;C00026	C00166;C00025	TAT
463	R00694	2.6.1.5	FALSE	hsa01100	C00079 + C00026 <=> C00166 + C00025	C00079;C00026	C00166;C00025	TAT
517	R00734	2.6.1.5	TRUE	hsa00130	C00082 + C00026 <=> C01179 + C00025	C00082;C00026	C01179;C00025	TAT
519	R00734	2.6.1.5	TRUE	hsa00350	C00082 + C00026 <=> C01179 + C00025	C00082;C00026	C01179;C00025	TAT
521	R00734	2.6.1.5	TRUE	hsa00400	C00082 + C00026 <=> C01179 + C00025	C00082;C00026	C01179;C00025	TAT
523	R00734	2.6.1.5	TRUE	hsa01100	C00082 + C00026 <=> C01179 + C00025	C00082;C00026	C01179;C00025	TAT
3461	R07396	2.6.1.5	FALSE	hsa00270	C01180 + C00025 <=> C00073 + C00026	C01180;C00025	C00073;C00026	TAT
3462	R07396	2.6.1.5	FALSE	hsa01100	C01180 + C00025 <=> C00073 + C00026	C01180;C00025	C00073;C00026	TAT
Rid	EC	Irreversible	Pathway	Rid.1	C_in	C_out	Gene_symbol
129	R00220	4.3.1.19	FALSE	hsa00260	C00065 <=> C00022 + C00014	C00065	C00022;C00014	SDS;SDSL
131	R00220	4.3.1.19	FALSE	hsa01100	C00065 <=> C00022 + C00014	C00065	C00022;C00014	SDS;SDSL
686	R00996	4.3.1.19	TRUE	hsa00260	C00188 <=> C00109 + C00014	C00188	C00109;C00014	SDS;SDSL
687	R00996	4.3.1.19	TRUE	hsa00290	C00188 <=> C00109 + C00014	C00188	C00109;C00014	SDS;SDSL
688	R00996	4.3.1.19	TRUE	hsa01100	C00188 <=> C00109 + C00014	C00188	C00109;C00014	SDS;SDSL
1128	R01701	1.2.4.4	TRUE	hsa01100	C00141 + C15972 <=> C15977 + C00011	C00141;C15972	C15977;C00011	BCKDHA;BCKDHB
1129	R01702	1.2.4.4	FALSE	hsa01100	C00233 + C15972 <=> C15975 + C00011	C00233;C15972	C15975;C00011	BCKDHA;BCKDHB
2316	R04225	1.2.4.4	FALSE	hsa01100	C00671 + C15972 <=> C15979 + C00011	C00671;C15972	C15979;C00011	BCKDHA;BCKDHB
3517	R07599	1.2.4.4	FALSE	hsa00280	C00141 + C00068 <=> C15976 + C00011	C00141;C00068	C15976;C00011	BCKDHA;BCKDHB
3518	R07599	1.2.4.4	FALSE	hsa01100	C00141 + C00068 <=> C15976 + C00011	C00141;C00068	C15976;C00011	BCKDHA;BCKDHB
3519	R07600	1.2.4.4	FALSE	hsa00280	C15976 + C15972 <=> C15977 + C00068	C15976;C15972	C15977;C00068	BCKDHA;BCKDHB
3520	R07600	1.2.4.4	FALSE	hsa01100	C15976 + C15972 <=> C15977 + C00068	C15976;C15972	C15977;C00068	BCKDHA;BCKDHB
3521	R07601	1.2.4.4	FALSE	hsa00280	C00233 + C00068 <=> C15974 + C00011	C00233;C00068	C15974;C00011	BCKDHA;BCKDHB
3522	R07601	1.2.4.4	FALSE	hsa01100	C00233 + C00068 <=> C15974 + C00011	C00233;C00068	C15974;C00011	BCKDHA;BCKDHB
3523	R07602	1.2.4.4	FALSE	hsa00280	C15974 + C15972 <=> C15975 + C00068	C15974;C15972	C15975;C00068	BCKDHA;BCKDHB
3524	R07602	1.2.4.4	FALSE	hsa01100	C15974 + C15972 <=> C15975 + C00068	C15974;C15972	C15975;C00068	BCKDHA;BCKDHB
3525	R07603	1.2.4.4	FALSE	hsa00280	C00671 + C00068 <=> C15978 + C00011	C00671;C00068	C15978;C00011	BCKDHA;BCKDHB
3526	R07603	1.2.4.4	FALSE	hsa01100	C00671 + C00068 <=> C15978 + C00011	C00671;C00068	C15978;C00011	BCKDHA;BCKDHB
3527	R07604	1.2.4.4	FALSE	hsa00280	C15978 + C15972 <=> C15979 + C00068	C15978;C15972	C15979;C00068	BCKDHA;BCKDHB
3528	R07604	1.2.4.4	FALSE	hsa01100	C15978 + C15972 <=> C15979 + C00068	C15978;C15972	C15979;C00068	BCKDHA;BCKDHB
4043	R10997	1.2.4.4	TRUE	hsa00640	C21017 + C15972 <=> C21018 + C00068	C21017;C15972	C21018;C00068	BCKDHA;BCKDE1A;MSU;MSUD1;OVD1A
4044	R10996	1.2.4.4	TRUE	hsa00640	C00109 + C00068 <=> C21017 + C00011	C00109;C00068	C21017;C00011	BCKDHA;BCKDE1A;MSU;MSUD1;OVD1A
120	R00209	1.8.1.4	FALSE	hsa01100	C00022 + C00010 + C00003 <=> C00024 + C00011 + C00004 + C00080	C00022;C00010;C00003	C00024;C00011;C00004;C00080	DLD
1125	R01698	1.8.1.4	FALSE		C00579 + C00003 <=> C00248 + C00004 + C00080	C00579;C00003	C00248;C00004;C00080	DLD
2159	R03815	1.8.1.4	FALSE	hsa00260	C02972 + C00003 <=> C02051 + C00004 + C00080	C02972;C00003	C02051;C00004;C00080	DLD
3533	R07618	1.8.1.4	FALSE	hsa00010	C15973 + C00003 <=> C15972 + C00004 + C00080	C15973;C00003	C15972;C00004;C00080	DLD
3534	R07618	1.8.1.4	FALSE	hsa00020	C15973 + C00003 <=> C15972 + C00004 + C00080	C15973;C00003	C15972;C00004;C00080	DLD
3535	R07618	1.8.1.4	FALSE	hsa00280	C15973 + C00003 <=> C15972 + C00004 + C00080	C15973;C00003	C15972;C00004;C00080	DLD
3536	R07618	1.8.1.4	FALSE	hsa00620	C15973 + C00003 <=> C15972 + C00004 + C00080	C15973;C00003	C15972;C00004;C00080	DLD
3537	R07618	1.8.1.4	FALSE	hsa01100	C15973 + C00003 <=> C15972 + C00004 + C00080	C15973;C00003	C15972;C00004;C00080	DLD
3806	R08549	1.8.1.4	FALSE	hsa01100	C00026 + C00010 + C00003 <=> C00091 + C00011 + C00004 + C00080	C00026;C00010;C00003	C00091;C00011;C00004;C00080	DLD
3808	R08550	1.8.1.4	TRUE		C16832 + C00003 <=> C16237 + C00004 + C00080	C16832;C00003	C16237;C00004;C00080	DLD
4082	R08550	1.8.1.4	TRUE	hsa00310	C16832 + C00003 <=> C16237 + C00004 + C00080	C16832;C00003	C16237;C00004;C00080	DLD;DLDD;DLDH;E3;GCSL;LAD;PHE3
4083	R03815	1.8.1.4	TRUE	hsa00310	C02972 + C00003 <=> C02051 + C00004 + C00080	C02972;C00003	C02051;C00004;C00080	DLD;DLDD;DLDH;E3;GCSL;LAD;PHE3
4084	R07618	1.8.1.4	TRUE	hsa00310	C15973 + C00003 <=> C15972 + C00004 + C00080	C15973;C00003	C15972;C00004;C00080	DLD;DLDD;DLDH;E3;GCSL;LAD;PHE3
4085	R00209	1.8.1.4	TRUE	hsa00310	C00022 + C00010 + C00003 <=> C00024 + C00011 + C00004 + C00080	C00022;C00010;C00003	C00024;C00011;C00004;C00080	DLD;DLDD;DLDH;E3;GCSL;LAD;PHE3
4086	R01221	1.8.1.4	TRUE	hsa00310	C00037 + C00101 + C00003 <=> C00143 + C00014 + C00011 + C00004 + C00080	C00037;C00101;C00003	C00143;C00014;C00011;C00004;C00080	DLD;DLDD;DLDH;E3;GCSL;LAD;PHE3
4087	R01698	1.8.1.4	TRUE	hsa00310	C00579 + C00003 <=> C00248 + C00004 + C00080	C00579;C00003	C00248;C00004;C00080	DLD;DLDD;DLDH;E3;GCSL;LAD;PHE3
4088	R01933	1.8.1.4	TRUE	hsa00310	C00322 + C00010 + C00003 <=> C00527 + C00011 + C00004 + C00080	C00322;C00010;C00003	C00527;C00011;C00004;C00080	DLD;DLDD;DLDH;E3;GCSL;LAD;PHE3
4089	R08549	1.8.1.4	TRUE	hsa00310	C00026 + C00010 + C00003 <=> C00091 + C00011 + C00004 + C00080	C00026;C00010;C00003	C00091;C00011;C00004;C00080	DLD;DLDD;DLDH;E3;GCSL;LAD;PHE3
1689	R02662	2.3.1.168	TRUE	hsa00280	C00630 + C15973 <=> C00010 + C15977	C00630;C15973	C00010;C15977	DBT
1690	R02662	2.3.1.168	TRUE	hsa01100	C00630 + C15973 <=> C00010 + C15977	C00630;C15973	C00010;C15977	DBT
1911	R03174	2.3.1.168	FALSE	hsa00280	C15980 + C15973 <=> C00010 + C15979	C15980;C15973	C00010;C15979	DBT
1912	R03174	2.3.1.168	FALSE	hsa01100	C15980 + C15973 <=> C00010 + C15979	C15980;C15973	C00010;C15979	DBT
2265	R04097	2.3.1.168	FALSE	hsa00280	C02939 + C15973 <=> C00010 + C15975	C02939;C15973	C00010;C15975	DBT
2266	R04097	2.3.1.168	FALSE	hsa01100	C02939 + C15973 <=> C00010 + C15975	C02939;C15973	C00010;C15975	DBT
4045	R10998	2.3.1.168	TRUE	hsa00640	C00100 + C15973 <=> C00010 + C21018	C00100;C15973	C00010;C21018	DBT;BCATE2;BCKAD-E2;BCKADE2;BCOADC-E2;E2;E2B
Rid	EC	Irreversible	Pathway	Rid.1	C_in	C_out	Gene_symbol
535	R00762	3.1.3.11	TRUE	hsa01100	C00354 + C00001 <=> C00085 + C00009	C00354;C00001	C00085;C00009	FBP1;FBP2
1231	R01845	3.1.3.11	FALSE	hsa01100	C00447 + C00001 <=> C05382 + C00009	C00447;C00001	C05382;C00009	FBP1;FBP2
2607	R04780	3.1.3.11	FALSE	hsa00010	C05378 + C00001 <=> C05345 + C00009	C05378;C00001	C05345;C00009	FBP1;FBP2
2608	R04780	3.1.3.11	FALSE	hsa00030	C05378 + C00001 <=> C05345 + C00009	C05378;C00001	C05345;C00009	FBP1;FBP2
2609	R04780	3.1.3.11	FALSE	hsa00051	C05378 + C00001 <=> C05345 + C00009	C05378;C00001	C05345;C00009	FBP1;FBP2
2610	R04780	3.1.3.11	FALSE	hsa01100	C05378 + C00001 <=> C05345 + C00009	C05378;C00001	C05345;C00009	FBP1;FBP2
538	R00767	2.7.1.11	FALSE		C00063 + C00085 <=> C00112 + C00354	C00063;C00085	C00112;C00354	PFKL;PFKM;PFKP
542	R00769	2.7.1.11	FALSE		C00075 + C00085 <=> C00015 + C00354	C00075;C00085	C00015;C00354	PFKL;PFKM;PFKP
543	R00770	2.7.1.11	FALSE		C00081 + C00085 <=> C00104 + C00354	C00081;C00085	C00104;C00354	PFKL;PFKM;PFKP
1230	R01843	2.7.1.11	FALSE		C00002 + C05382 <=> C00008 + C00447	C00002;C05382	C00008;C00447	PFKL;PFKM;PFKP
1932	R03236	2.7.1.11	FALSE	hsa00052	C01097 + C00002 <=> C03785 + C00008	C01097;C00002	C03785;C00008	PFKL;PFKM;PFKP
1933	R03236	2.7.1.11	FALSE	hsa01100	C01097 + C00002 <=> C03785 + C00008	C01097;C00002	C03785;C00008	PFKL;PFKM;PFKP
1934	R03237	2.7.1.11	FALSE	hsa00052	C00063 + C01097 <=> C00112 + C03785	C00063;C01097	C00112;C03785	PFKL;PFKM;PFKP
1935	R03237	2.7.1.11	FALSE	hsa01100	C00063 + C01097 <=> C00112 + C03785	C00063;C01097	C00112;C03785	PFKL;PFKM;PFKP
1936	R03238	2.7.1.11	FALSE	hsa00052	C00075 + C01097 <=> C00015 + C03785	C00075;C01097	C00015;C03785	PFKL;PFKM;PFKP
1937	R03238	2.7.1.11	FALSE	hsa01100	C00075 + C01097 <=> C00015 + C03785	C00075;C01097	C00015;C03785	PFKL;PFKM;PFKP
1938	R03239	2.7.1.11	FALSE	hsa00052	C00081 + C01097 <=> C00104 + C03785	C00081;C01097	C00104;C03785	PFKL;PFKM;PFKP
1939	R03239	2.7.1.11	FALSE	hsa01100	C00081 + C01097 <=> C00104 + C03785	C00081;C01097	C00104;C03785	PFKL;PFKM;PFKP
2603	R04779	2.7.1.11	FALSE	hsa00010	C00002 + C05345 <=> C00008 + C05378	C00002;C05345	C00008;C05378	PFKL;PFKM;PFKP
2604	R04779	2.7.1.11	FALSE	hsa00030	C00002 + C05345 <=> C00008 + C05378	C00002;C05345	C00008;C05378	PFKL;PFKM;PFKP
2605	R04779	2.7.1.11	FALSE	hsa00051	C00002 + C05345 <=> C00008 + C05378	C00002;C05345	C00008;C05378	PFKL;PFKM;PFKP
2606	R04779	2.7.1.11	FALSE	hsa01100	C00002 + C05345 <=> C00008 + C05378	C00002;C05345	C00008;C05378	PFKL;PFKM;PFKP
735	R01068	4.1.2.13	TRUE	hsa01100	C00354 <=> C00111 + C00118	C00354	C00111;C00118	ALDOA;ALDOB;ALDOC
736	R01070	4.1.2.13	FALSE	hsa00010	C05378 <=> C00111 + C00118	C05378	C00111;C00118	ALDOA;ALDOB;ALDOC
737	R01070	4.1.2.13	FALSE	hsa00030	C05378 <=> C00111 + C00118	C05378	C00111;C00118	ALDOA;ALDOB;ALDOC
738	R01070	4.1.2.13	FALSE	hsa00051	C05378 <=> C00111 + C00118	C05378	C00111;C00118	ALDOA;ALDOB;ALDOC
739	R01070	4.1.2.13	FALSE	hsa01100	C05378 <=> C00111 + C00118	C05378	C00111;C00118	ALDOA;ALDOB;ALDOC
1214	R01829	4.1.2.13	FALSE	hsa01100	C00447 <=> C00111 + C00279	C00447	C00111;C00279	ALDOA;ALDOB;ALDOC
1639	R02568	4.1.2.13	FALSE	hsa00051	C01094 <=> C00111 + C00577	C01094	C00111;C00577	ALDOA;ALDOB;ALDOC
1640	R02568	4.1.2.13	FALSE	hsa01100	C01094 <=> C00111 + C00577	C01094	C00111;C00577	ALDOA;ALDOB;ALDOC
544	R00771	5.3.1.9	TRUE		C00092 <=> C00085	C00092	C00085	GPI
1726	R02739	5.3.1.9	FALSE	hsa00010	C00668 <=> C01172	C00668	C01172	GPI
1727	R02739	5.3.1.9	FALSE	hsa00030	C00668 <=> C01172	C00668	C01172	GPI
1728	R02739	5.3.1.9	FALSE	hsa01100	C00668 <=> C01172	C00668	C01172	GPI
1729	R02740	5.3.1.9	FALSE	hsa00010	C00668 <=> C05345	C00668	C05345	GPI
1730	R02740	5.3.1.9	FALSE	hsa00030	C00668 <=> C05345	C00668	C05345	GPI
1731	R02740	5.3.1.9	FALSE	hsa00500	C00668 <=> C05345	C00668	C05345	GPI
1732	R02740	5.3.1.9	FALSE	hsa00520	C00668 <=> C05345	C00668	C05345	GPI
1733	R02740	5.3.1.9	FALSE	hsa01100	C00668 <=> C05345	C00668	C05345	GPI
1982	R03321	5.3.1.9	FALSE	hsa00010	C01172 <=> C05345	C01172	C05345	GPI
1983	R03321	5.3.1.9	FALSE	hsa01100	C01172 <=> C05345	C01172	C05345	GPI
564	R00835	1.1.1.49	TRUE		C00092 + C00006 <=> C01236 + C00005 + C00080	C00092;C00006	C01236;C00005;C00080	G6PD
1723	R02736	1.1.1.49	FALSE	hsa00030	C01172 + C00006 <=> C01236 + C00005 + C00080	C01172;C00006	C01236;C00005;C00080	G6PD
1724	R02736	1.1.1.49	FALSE	hsa00480	C01172 + C00006 <=> C01236 + C00005 + C00080	C01172;C00006	C01236;C00005;C00080	G6PD
1725	R02736	1.1.1.49	FALSE	hsa01100	C01172 + C00006 <=> C01236 + C00005 + C00080	C01172;C00006	C01236;C00005;C00080	G6PD
4046	R02736	1.1.1.363	TRUE	hsa00030	C01172 + C00006 <=> C01236 + C00005 + C00080	C01172;C00006	C01236;C00005;C00080	G6PD;G6PD1
4047	R10907	1.1.1.363	TRUE	hsa00030	C01172 + C00003 <=> C01236 + C00004 + C00080	C01172;C00003	C01236;C00004;C00080	G6PD;G6PD1
1342	R02035	3.1.1.31	TRUE	hsa00030	C01236 + C00001 <=> C00345	C01236;C00001	C00345	PGLS;H6PD
1343	R02035	3.1.1.31	TRUE	hsa01100	C01236 + C00001 <=> C00345	C01236;C00001	C00345	PGLS;H6PD
1042	R01520	1.1.1.47	TRUE	hsa00030	C00221 + C00003 <=> C00198 + C00004 + C00080	C00221;C00003	C00198;C00004;C00080	H6PD
1043	R01521	1.1.1.47	TRUE	hsa00030	C00221 + C00006 <=> C00198 + C00005 + C00080	C00221;C00006	C00198;C00005;C00080	H6PD
1044	R01528	1.1.1.44	TRUE	hsa00030	C00345 + C00006 <=> C00199 + C00011 + C00005 + C00080	C00345;C00006	C00199;C00011;C00005;C00080	PGD
1045	R01528	1.1.1.44	TRUE	hsa00480	C00345 + C00006 <=> C00199 + C00011 + C00005 + C00080	C00345;C00006	C00199;C00011;C00005;C00080	PGD
1046	R01528	1.1.1.44	TRUE	hsa01100	C00345 + C00006 <=> C00199 + C00011 + C00005 + C00080	C00345;C00006	C00199;C00011;C00005;C00080	PGD
4048	R10221	1.1.1.343	TRUE	hsa00030	C00345 + C00003 <=> C00199 + C00011 + C00004 + C00080	C00345;C00003	C00199;C00011;C00004;C0008	PGD;6PGD
734	R01067	2.2.1.1	FALSE	hsa01100	C00085 + C00118 <=> C00279 + C00231	C00085;C00118	C00279;C00231	TKT;TKTL1;TKTL2
1092	R01641	2.2.1.1	TRUE	hsa00030	C05382 + C00118 <=> C00117 + C00231	C05382;C00118	C00117;C00231	TKT;TKTL1;TKTL2
1093	R01641	2.2.1.1	TRUE	hsa01100	C05382 + C00118 <=> C00117 + C00231	C05382;C00118	C00117;C00231	TKT;TKTL1;TKTL2
1215	R01830	2.2.1.1	FALSE	hsa00030	C05345 + C00118 <=> C00279 + C00231	C05345;C00118	C00279;C00231	TKT;TKTL1;TKTL2
1216	R01830	2.2.1.1	FALSE	hsa01100	C05345 + C00118 <=> C00279 + C00231	C05345;C00118	C00279;C00231	TKT;TKTL1;TKTL2
3244	R06861	2.2.1.1	FALSE		C00231 + C00068 <=> C13378 + C00118	C00231;C00068	C13378;C00118	TKT;TKTL1;TKTL2
3245	R06863	2.2.1.1	FALSE		C05382 + C00068 <=> C13378 + C00117	C05382;C00068	C13378;C00117	TKT;TKTL1;TKTL2
1047	R01529	5.1.3.1	TRUE	hsa00030	C00199 <=> C00231	C00199	C00231	RPE;RPEL1
1048	R01529	5.1.3.1	TRUE	hsa00040	C00199 <=> C00231	C00199	C00231	RPE;RPEL1
1049	R01529	5.1.3.1	TRUE	hsa01100	C00199 <=> C00231	C00199	C00231	RPE;RPEL1
725	R01056	5.3.1.6	TRUE	hsa00030	C00117 <=> C00199	C00117	C00199	RPIA
726	R01056	5.3.1.6	TRUE	hsa01100	C00117 <=> C00199	C00117	C00199	RPIA
719	R01049	2.7.6.1	TRUE	hsa00030	C00002 + C00117 <=> C00020 + C00119	C00002;C00117	C00020;C00119	PRPS1L1;PRPS1;PRPS2
720	R01049	2.7.6.1	TRUE	hsa00230	C00002 + C00117 <=> C00020 + C00119	C00002;C00117	C00020;C00119	PRPS1L1;PRPS1;PRPS2
721	R01049	2.7.6.1	TRUE	hsa01100	C00002 + C00117 <=> C00020 + C00119	C00002;C00117	C00020;C00119	PRPS1L1;PRPS1;PRPS2
1212	R01827	2.2.1.2	FALSE	hsa00030	C05382 + C00118 <=> C00279 + C05345	C05382;C00118	C00279;C05345	TALDO1
1213	R01827	2.2.1.2	FALSE	hsa01100	C05382 + C00118 <=> C00279 + C05345	C05382;C00118	C00279;C05345	TALDO1
3812	R08575	2.2.1.2	TRUE		C05382 + C00118 <=> C00279 + C00085	C05382;C00118	C00279;C00085	TALDO1
722	R01051	2.7.1.15	TRUE	hsa00030	C00002 + C00121 <=> C00008 + C00117	C00002;C00121	C00008;C00117	RBKS
1742	R02750	2.7.1.15	FALSE	hsa00030	C00673 + C00008 <=> C01801 + C00002	C00673;C00008	C01801;C00002	RBKS
655	R00959	5.4.2.2	FALSE	hsa00010	C00103 <=> C00668	C00103	C00668	PGM1;PGM2
656	R00959	5.4.2.2	FALSE	hsa00052	C00103 <=> C00668	C00103	C00668	PGM1;PGM2
657	R00959	5.4.2.2	FALSE	hsa00500	C00103 <=> C00668	C00103	C00668	PGM1;PGM2
658	R00959	5.4.2.2	FALSE	hsa00520	C00103 <=> C00668	C00103	C00668	PGM1;PGM2
659	R00959	5.4.2.2	FALSE	hsa01100	C00103 <=> C00668	C00103	C00668	PGM1;PGM2
727	R01057	5.4.2.2	FALSE	hsa00030	C00620 <=> C00117	C00620	C00117	PGM1;PGM2
729	R01057	5.4.2.2	FALSE	hsa00230	C00620 <=> C00117	C00620	C00117	PGM1;PGM2
1981	R03319	5.4.2.2	FALSE		C01171 <=> C03735	C01171	C03735	PGM1;PGM2
728	R01057	5.4.2.7	TRUE	hsa00030	C00620 <=> C00117	C00620	C00117	PGM2
730	R01057	5.4.2.7	TRUE	hsa00230	C00620 <=> C00117	C00620	C00117	PGM2
1741	R02749	5.4.2.7	FALSE	hsa00030	C00672 <=> C00673	C00672	C00673	PGM2
Rid	EC	Irreversible	Pathway	Rid.1	C_in	C_out	Gene_symbol
1081	R01624	2.3.1.85	FALSE	hsa00061	C00024 + C00229 <=> C00010 + C03939	C00024;C00229	C00010;C03939	FASN
1082	R01624	2.3.1.85	FALSE	hsa01100	C00024 + C00229 <=> C00010 + C03939	C00024;C00229	C00010;C03939	FASN
1085	R01626	2.3.1.85	FALSE	hsa00061	C00083 + C00229 <=> C00010 + C01209	C00083;C00229	C00010;C01209	FASN
1087	R01626	2.3.1.85	FALSE	hsa01100	C00083 + C00229 <=> C00010 + C01209	C00083;C00229	C00010;C01209	FASN
1131	R01706	2.3.1.85	FALSE	hsa00061	C05764 + C00001 <=> C00229 + C00249	C05764;C00001	C00229;C00249	FASN
1133	R01706	2.3.1.85	FALSE	hsa01100	C05764 + C00001 <=> C00229 + C00249	C05764;C00001	C00229;C00249	FASN
2366	R04355	2.3.1.85	FALSE	hsa00061	C03939 + C01209 <=> C05744 + C00011 + C00229	C03939;C01209	C05744;C00011;C00229	FASN
2368	R04355	2.3.1.85	FALSE	hsa01100	C03939 + C01209 <=> C05744 + C00011 + C00229	C03939;C01209	C05744;C00011;C00229	FASN
2427	R04533	2.3.1.85	FALSE	hsa00061	C04618 + C00006 <=> C05744 + C00005 + C00080	C04618;C00006	C05744;C00005;C00080	FASN
2428	R04533	2.3.1.85	FALSE	hsa01100	C04618 + C00006 <=> C05744 + C00005 + C00080	C04618;C00006	C05744;C00005;C00080	FASN
2429	R04534	2.3.1.85	FALSE	hsa00061	C04619 + C00006 <=> C05753 + C00005	C04619;C00006	C05753;C00005	FASN
2430	R04534	2.3.1.85	FALSE	hsa01100	C04619 + C00006 <=> C05753 + C00005	C04619;C00006	C05753;C00005	FASN
2431	R04535	2.3.1.85	FALSE	hsa00061	C04619 <=> C05754 + C00001	C04619	C05754;C00001	FASN
2432	R04535	2.3.1.85	FALSE	hsa01100	C04619 <=> C05754 + C00001	C04619	C05754;C00001	FASN
2433	R04536	2.3.1.85	FALSE	hsa00061	C04620 + C00006 <=> C05750 + C00005 + C00080	C04620;C00006	C05750;C00005;C00080	FASN
2434	R04536	2.3.1.85	FALSE	hsa01100	C04620 + C00006 <=> C05750 + C00005 + C00080	C04620;C00006	C05750;C00005;C00080	FASN
2435	R04537	2.3.1.85	FALSE	hsa00061	C04620 <=> C05751 + C00001	C04620	C05751;C00001	FASN
2436	R04537	2.3.1.85	FALSE	hsa01100	C04620 <=> C05751 + C00001	C04620	C05751;C00001	FASN
2437	R04543	2.3.1.85	FALSE	hsa00061	C04633 + C00006 <=> C05762 + C00005 + C00080	C04633;C00006	C05762;C00005;C00080	FASN
2438	R04543	2.3.1.85	FALSE	hsa01100	C04633 + C00006 <=> C05762 + C00005 + C00080	C04633;C00006	C05762;C00005;C00080	FASN
2439	R04544	2.3.1.85	FALSE	hsa00061	C04633 <=> C05763 + C00001	C04633	C05763;C00001	FASN
2440	R04544	2.3.1.85	FALSE	hsa01100	C04633 <=> C05763 + C00001	C04633	C05763;C00001	FASN
2455	R04566	2.3.1.85	FALSE	hsa00061	C04688 + C00006 <=> C05759 + C00005 + C00080	C04688;C00006	C05759;C00005;C00080	FASN
2456	R04566	2.3.1.85	FALSE	hsa01100	C04688 + C00006 <=> C05759 + C00005 + C00080	C04688;C00006	C05759;C00005;C00080	FASN
2457	R04568	2.3.1.85	FALSE	hsa00061	C04688 <=> C05760 + C00001	C04688	C05760;C00001	FASN
2458	R04568	2.3.1.85	FALSE	hsa01100	C04688 <=> C05760 + C00001	C04688	C05760;C00001	FASN
2509	R04725	2.3.1.85	FALSE	hsa00061	C05223 + C00006 <=> C05758 + C00005 + C00080	C05223;C00006	C05758;C00005;C00080	FASN
2510	R04725	2.3.1.85	FALSE	hsa01100	C05223 + C00006 <=> C05758 + C00005 + C00080	C05223;C00006	C05758;C00005;C00080	FASN
2511	R04726	2.3.1.85	FALSE	hsa00061	C05223 + C01209 <=> C05759 + C00011 + C00229	C05223;C01209	C05759;C00011;C00229	FASN
2513	R04726	2.3.1.85	FALSE	hsa01100	C05223 + C01209 <=> C05759 + C00011 + C00229	C05223;C01209	C05759;C00011;C00229	FASN
2724	R04952	2.3.1.85	FALSE	hsa00061	C05745 + C01209 <=> C05746 + C00011 + C00229	C05745;C01209	C05746;C00011;C00229	FASN
2726	R04952	2.3.1.85	FALSE	hsa01100	C05745 + C01209 <=> C05746 + C00011 + C00229	C05745;C01209	C05746;C00011;C00229	FASN
2728	R04953	2.3.1.85	FALSE	hsa00061	C05747 + C00006 <=> C05746 + C00005 + C00080	C05747;C00006	C05746;C00005;C00080	FASN
2729	R04953	2.3.1.85	FALSE	hsa01100	C05747 + C00006 <=> C05746 + C00005 + C00080	C05747;C00006	C05746;C00005;C00080	FASN
2730	R04954	2.3.1.85	FALSE	hsa00061	C05747 <=> C05748 + C00001	C05747	C05748;C00001	FASN
2731	R04954	2.3.1.85	FALSE	hsa01100	C05747 <=> C05748 + C00001	C05747	C05748;C00001	FASN
2732	R04956	2.3.1.85	FALSE	hsa00061	C05749 + C00006 <=> C05748 + C00005 + C00080	C05749;C00006	C05748;C00005;C00080	FASN
2733	R04956	2.3.1.85	FALSE	hsa01100	C05749 + C00006 <=> C05748 + C00005 + C00080	C05749;C00006	C05748;C00005;C00080	FASN
2734	R04957	2.3.1.85	FALSE	hsa00061	C05749 + C01209 <=> C05750 + C00011 + C00229	C05749;C01209	C05750;C00011;C00229	FASN
2736	R04957	2.3.1.85	FALSE	hsa01100	C05749 + C01209 <=> C05750 + C00011 + C00229	C05749;C01209	C05750;C00011;C00229	FASN
2738	R04959	2.3.1.85	FALSE	hsa00061	C05752 + C00006 <=> C05751 + C00005 + C00080	C05752;C00006	C05751;C00005;C00080	FASN
2739	R04959	2.3.1.85	FALSE	hsa01100	C05752 + C00006 <=> C05751 + C00005 + C00080	C05752;C00006	C05751;C00005;C00080	FASN
2740	R04960	2.3.1.85	FALSE	hsa00061	C05752 + C01209 <=> C05753 + C00011 + C00229	C05752;C01209	C05753;C00011;C00229	FASN
2742	R04960	2.3.1.85	FALSE	hsa01100	C05752 + C01209 <=> C05753 + C00011 + C00229	C05752;C01209	C05753;C00011;C00229	FASN
2744	R04962	2.3.1.85	FALSE	hsa00061	C05755 + C00006 <=> C05754 + C00005 + C00080	C05755;C00006	C05754;C00005;C00080	FASN
2745	R04962	2.3.1.85	FALSE	hsa01100	C05755 + C00006 <=> C05754 + C00005 + C00080	C05755;C00006	C05754;C00005;C00080	FASN
2746	R04963	2.3.1.85	FALSE	hsa00061	C05755 + C01209 <=> C05756 + C00011 + C00229	C05755;C01209	C05756;C00011;C00229	FASN
2748	R04963	2.3.1.85	FALSE	hsa01100	C05755 + C01209 <=> C05756 + C00011 + C00229	C05755;C01209	C05756;C00011;C00229	FASN
2750	R04964	2.3.1.85	FALSE	hsa00061	C05757 + C00006 <=> C05756 + C00005 + C00080	C05757;C00006	C05756;C00005;C00080	FASN
2751	R04964	2.3.1.85	FALSE	hsa01100	C05757 + C00006 <=> C05756 + C00005 + C00080	C05757;C00006	C05756;C00005;C00080	FASN
2752	R04965	2.3.1.85	FALSE	hsa00061	C05757 <=> C05758 + C00001	C05757	C05758;C00001	FASN
2753	R04965	2.3.1.85	FALSE	hsa01100	C05757 <=> C05758 + C00001	C05757	C05758;C00001	FASN
2754	R04967	2.3.1.85	FALSE	hsa00061	C05761 + C00006 <=> C05760 + C00005 + C00080	C05761;C00006	C05760;C00005;C00080	FASN
2755	R04967	2.3.1.85	FALSE	hsa01100	C05761 + C00006 <=> C05760 + C00005 + C00080	C05761;C00006	C05760;C00005;C00080	FASN
2756	R04968	2.3.1.85	FALSE	hsa00061	C05761 + C01209 <=> C05762 + C00011 + C00229	C05761;C01209	C05762;C00011;C00229	FASN
2758	R04968	2.3.1.85	FALSE	hsa01100	C05761 + C01209 <=> C05762 + C00011 + C00229	C05761;C01209	C05762;C00011;C00229	FASN
2760	R04970	2.3.1.85	FALSE	hsa00061	C05764 + C00006 <=> C05763 + C00005 + C00080	C05764;C00006	C05763;C00005;C00080	FASN
2761	R04970	2.3.1.85	FALSE	hsa01100	C05764 + C00006 <=> C05763 + C00005 + C00080	C05764;C00006	C05763;C00005;C00080	FASN
2812	R05188	2.3.1.85	NA		C00024 + n C00083 + 2n C00005 + 2n C00080 <=> C00638 + n C00011 + 2n C00006 + (n+1) C00010 + n C00001	C00024;C00083;C00005;C00080	C00638;C00011;C00006;C00010;C00001	FASN
525	R00742	6.4.1.2	TRUE	hsa00620	C00002 + C00024 + C00288 <=> C00008 + C00009 + C00083	C00002;C00024;C00288	C00008;C00009;C00083	ACACA;ACACB
526	R00742	6.4.1.2	TRUE	hsa00640	C00002 + C00024 + C00288 <=> C00008 + C00009 + C00083	C00002;C00024;C00288	C00008;C00009;C00083	ACACA;ACACB
527	R00742	6.4.1.2	TRUE	hsa01100	C00002 + C00024 + C00288 <=> C00008 + C00009 + C00083	C00002;C00024;C00288	C00008;C00009;C00083	ACACA;ACACB
2381	R04386	6.4.1.2	FALSE	hsa00061	C00024 + C04419 <=> C00083 + C06250	C00024;C04419	C00083;C06250	ACACA;ACACB
2382	R04386	6.4.1.2	FALSE	hsa01100	C00024 + C04419 <=> C00083 + C06250	C00024;C04419	C00083;C06250	ACACA;ACACB
1084	R01626	2.3.1.39	TRUE	hsa00061	C00083 + C00229 <=> C00010 + C01209	C00083;C00229	C00010;C01209	MCAT
1086	R01626	2.3.1.39	TRUE	hsa01100	C00083 + C00229 <=> C00010 + C01209	C00083;C00229	C00010;C01209	MCAT
2367	R04355	2.3.1.179	FALSE	hsa00061	C03939 + C01209 <=> C05744 + C00011 + C00229	C03939;C01209	C05744;C00011;C00229	OXSM
2369	R04355	2.3.1.179	FALSE	hsa01100	C03939 + C01209 <=> C05744 + C00011 + C00229	C03939;C01209	C05744;C00011;C00229	OXSM
2512	R04726	2.3.1.179	FALSE	hsa00061	C05223 + C01209 <=> C05759 + C00011 + C00229	C05223;C01209	C05759;C00011;C00229	OXSM
2514	R04726	2.3.1.179	FALSE	hsa01100	C05223 + C01209 <=> C05759 + C00011 + C00229	C05223;C01209	C05759;C00011;C00229	OXSM
2725	R04952	2.3.1.179	FALSE	hsa00061	C05745 + C01209 <=> C05746 + C00011 + C00229	C05745;C01209	C05746;C00011;C00229	OXSM
2727	R04952	2.3.1.179	FALSE	hsa01100	C05745 + C01209 <=> C05746 + C00011 + C00229	C05745;C01209	C05746;C00011;C00229	OXSM
2735	R04957	2.3.1.179	FALSE	hsa00061	C05749 + C01209 <=> C05750 + C00011 + C00229	C05749;C01209	C05750;C00011;C00229	OXSM
2737	R04957	2.3.1.179	FALSE	hsa01100	C05749 + C01209 <=> C05750 + C00011 + C00229	C05749;C01209	C05750;C00011;C00229	OXSM
2741	R04960	2.3.1.179	FALSE	hsa00061	C05752 + C01209 <=> C05753 + C00011 + C00229	C05752;C01209	C05753;C00011;C00229	OXSM
2743	R04960	2.3.1.179	FALSE	hsa01100	C05752 + C01209 <=> C05753 + C00011 + C00229	C05752;C01209	C05753;C00011;C00229	OXSM
2747	R04963	2.3.1.179	FALSE	hsa00061	C05755 + C01209 <=> C05756 + C00011 + C00229	C05755;C01209	C05756;C00011;C00229	OXSM
2749	R04963	2.3.1.179	FALSE	hsa01100	C05755 + C01209 <=> C05756 + C00011 + C00229	C05755;C01209	C05756;C00011;C00229	OXSM
2757	R04968	2.3.1.179	FALSE	hsa00061	C05761 + C01209 <=> C05762 + C00011 + C00229	C05761;C01209	C05762;C00011;C00229	OXSM
2759	R04968	2.3.1.179	FALSE	hsa01100	C05761 + C01209 <=> C05762 + C00011 + C00229	C05761;C01209	C05762;C00011;C00229	OXSM
3555	R07762	2.3.1.179	FALSE	hsa00061	C05764 + C01209 <=> C16219 + C00229 + C00011	C05764;C01209	C16219;C00229;C00011	OXSM
4007	R10115	2.3.1.179	NA	hsa00780	C19673 + C01209 <=> C20372 + C00011 + C00229	C19673;C01209	C20372;C00011;C00229	OXSM
4008	R10115	2.3.1.179	NA	hsa01100	C19673 + C01209 <=> C20372 + C00011 + C00229	C19673;C01209	C20372;C00011;C00229	OXSM
4009	R10119	2.3.1.179	NA	hsa00780	C20375 + C01209 <=> C20376 + C00011 + C00229	C20375;C01209	C20376;C00011;C00229	OXSM
4010	R10119	2.3.1.179	NA	hsa01100	C20375 + C01209 <=> C20376 + C00011 + C00229	C20375;C01209	C20376;C00011;C00229	OXSM
1769	R02834	1.1.1.-	NA	hsa00140	C00735 + C00003 <=> C00762 + C00004 + C00080	C00735;C00003	C00762;C00004;C00080	HSD11B2
1770	R02834	1.1.1.-	NA	hsa01100	C00735 + C00003 <=> C00762 + C00004 + C00080	C00735;C00003	C00762;C00004;C00080	RDH10;RDH8;RDH16
2166	R03847	1.1.1.-	NA	hsa00140	C02140 + C00003 <=> C05490 + C00004 + C00080	C02140;C00003	C05490;C00004;C00080	HSD11B2
2711	R04919	1.1.1.-	NA	hsa01100	C05668 + C00006 <=> C05989 + C00005 + C00080	C05668;C00006	C05989;C00005;C00080	RDH10;RDH8;RDH16
2832	R05351	1.1.1.-	NA	hsa01100	C06548 + C00010 + C00003 <=> C00024 + C00004 + C00080	C06548;C00010;C00003	C00024;C00004;C00080	RDH10;RDH8;RDH16
3547	R07676	1.1.1.-	NA	hsa01100	C15930 + C00006 <=> C00333 + C00005 + C00080	C15930;C00006	C00333;C00005;C00080	RDH10;RDH8;RDH16
3767	R08379	1.1.1.-	NA	hsa00830	C00473 + C00006 <=> C00376 + C00005 + C00080	C00473;C00006	C00376;C00005;C00080	RDH10;RDH8;RDH16
3768	R08379	1.1.1.-	NA	hsa01100	C00473 + C00006 <=> C00376 + C00005 + C00080	C00473;C00006	C00376;C00005;C00080	RDH10;RDH8;RDH16
3769	R08380	1.1.1.-	NA	hsa00830	C00899 + C00006 <=> C02110 + C00005 + C00080	C00899;C00006	C02110;C00005;C00080	RDH10;RDH8;RDH16
3771	R08383	1.1.1.-	NA	hsa00830	C16682 + C00006 <=> C16681 + C00005 + C00080	C16682;C00006	C16681;C00005;C00080	RDH10;RDH8;RDH16
3903	R09281	1.1.1.-	NA	hsa01100	C00989 + C00006 <=> C00232 + C00080 + C00005	C00989;C00006	C00232;C00080;C00005	RDH10;RDH8;RDH16
3904	R09289	1.1.1.-	NA	hsa01100	C01013 + C00006 <=> C00222 + C00005 + C00080	C01013;C00006	C00222;C00005;C00080	RDH10;RDH8;RDH16
4031	R10563	1.1.1.-	NA	hsa01100	C02426 + C00005 + C00080 <=> C00116 + C00006	C02426;C00005;C00080	C00116;C00006	RDH10;RDH8;RDH16
4032	R10565	1.1.1.-	NA	hsa01100	C15930 + C00003 <=> C00333 + C00004 + C00080	C15930;C00003	C00333;C00004;C00080	RDH10;RDH8;RDH16
1218	R01836	1.1.1.239	TRUE	hsa00140	C00535 + C00003 <=> C00280 + C00004 + C00080	C00535;C00003	C00280;C00004;C00080	HSD17B2;HSD17B8;HSD17B6
1219	R01836	1.1.1.239	TRUE	hsa01100	C00535 + C00003 <=> C00280 + C00004 + C00080	C00535;C00003	C00280;C00004;C00080	HSD17B2;HSD17B8;HSD17B6
4049	R01836	1.1.1.239	FALSE	hsa00061	C00535 + C00003 <=> C00280 + C00004 + C00080	C00535;C00003	C00280;C00004;C00080	HSD17B8;D6S2245E;FABG;FABGL;H2-KE6;HKE6;KE6;RING2;SDR30C1;dJ1033B10.9
1532	R02352	1.1.1.62	TRUE	hsa00140	C00951 + C00003 <=> C00468 + C00004 + C00080	C00951;C00003	C00468;C00004;C00080	HSD17B1;HSD17B2;HSD17B12;HSD17B7;HSD17B8;HSD17B6
1533	R02352	1.1.1.62	TRUE	hsa01100	C00951 + C00003 <=> C00468 + C00004 + C00080	C00951;C00003	C00468;C00004;C00080	HSD17B1;HSD17B2;HSD17B12;HSD17B7;HSD17B8;HSD17B6
1534	R02353	1.1.1.62	TRUE	hsa00140	C00951 + C00006 <=> C00468 + C00005 + C00080	C00951;C00006	C00468;C00005;C00080	HSD17B1;HSD17B2;HSD17B12;HSD17B7;HSD17B8;HSD17B6
1535	R02353	1.1.1.62	TRUE	hsa01100	C00951 + C00006 <=> C00468 + C00005 + C00080	C00951;C00006	C00468;C00005;C00080	HSD17B1;HSD17B2;HSD17B12;HSD17B7;HSD17B8;HSD17B6
2501	R04681	1.1.1.62	FALSE	hsa00140	C05141 + C00003 <=> C05300 + C00004 + C00080	C05141;C00003	C05300;C00004;C00080	HSD17B1;HSD17B2;HSD17B12;HSD17B7;HSD17B8;HSD17B6
2502	R04681	1.1.1.62	FALSE	hsa01100	C05141 + C00003 <=> C05300 + C00004 + C00080	C05141;C00003	C05300;C00004;C00080	HSD17B1;HSD17B2;HSD17B12;HSD17B7;HSD17B8;HSD17B6
2503	R04682	1.1.1.62	FALSE	hsa00140	C05141 + C00006 <=> C05300 + C00005 + C00080	C05141;C00006	C05300;C00005;C00080	HSD17B1;HSD17B2;HSD17B12;HSD17B7;HSD17B8;HSD17B6
2504	R04682	1.1.1.62	FALSE	hsa01100	C05141 + C00006 <=> C05300 + C00005 + C00080	C05141;C00006	C05300;C00005;C00080	HSD17B1;HSD17B2;HSD17B12;HSD17B7;HSD17B8;HSD17B6
3872	R08945	1.1.1.62	FALSE	hsa00140	C18075 + C00003 <=> C05284 + C00004 + C00080	C18075;C00003	C05284;C00004;C00080	HSD17B1;HSD17B2;HSD17B12;HSD17B7;HSD17B8;HSD17B6
3887	R08980	1.1.1.62	FALSE	hsa00140	C18075 + C00006 <=> C05284 + C00005 + C00080	C18075;C00006	C05284;C00005;C00080	HSD17B1;HSD17B2;HSD17B12;HSD17B7;HSD17B8;HSD17B6
4050	R01836	1.1.1.62	FALSE	hsa00061	C00535 + C00003 <=> C00280 + C00004 + C00080	C00535;C00003	C00280;C00004;C00080	HSD17B8;D6S2245E;FABG;FABGL;H2-KE6;HKE6;KE6;RING2;SDR30C1;dJ1033B10.9
898	R01278	1.3.1.38	FALSE	hsa00062	C00154 + C00006 <=> C05272 + C00005 + C00080	C00154;C00006	C05272;C00005;C00080	MECR
899	R01278	1.3.1.38	FALSE	hsa01100	C00154 + C00006 <=> C05272 + C00005 + C00080	C00154;C00006	C05272;C00005;C00080	MECR;PECR
2139	R03776	1.3.1.38	FALSE	hsa00062	C01944 + C00006 <=> C05276 + C00005 + C00080	C01944;C00006	C05276;C00005;C00080	MECR
2140	R03776	1.3.1.38	FALSE	hsa01100	C01944 + C00006 <=> C05276 + C00005 + C00080	C01944;C00006	C05276;C00005;C00080	MECR;PECR
2172	R03856	1.3.1.38	FALSE	hsa00062	C01832 + C00006 <=> C03221 + C00005 + C00080	C01832;C00006	C03221;C00005;C00080	MECR
2173	R03856	1.3.1.38	FALSE	hsa01100	C01832 + C00006 <=> C03221 + C00005 + C00080	C01832;C00006	C03221;C00005;C00080	MECR;PECR
2224	R03989	1.3.1.38	FALSE	hsa00062	C02593 + C00006 <=> C05273 + C00005 + C00080	C02593;C00006	C05273;C00005;C00080	MECR
2225	R03989	1.3.1.38	FALSE	hsa01100	C02593 + C00006 <=> C05273 + C00005 + C00080	C02593;C00006	C05273;C00005;C00080	MECR;PECR
2583	R04753	1.3.1.38	FALSE	hsa00062	C05274 + C00006 <=> C05275 + C00005 + C00080	C05274;C00006	C05275;C00005;C00080	MECR
2584	R04753	1.3.1.38	FALSE	hsa01100	C05274 + C00006 <=> C05275 + C00005 + C00080	C05274;C00006	C05275;C00005;C00080	MECR;PECR
3255	R06985	1.3.1.38	FALSE	hsa00062	C05271 + C00005 + C00080 <=> C05270 + C00006	C05271;C00005;C00080	C05270;C00006	MECR
3256	R06985	1.3.1.38	FALSE	hsa01100	C05271 + C00005 + C00080 <=> C05270 + C00006	C05271;C00005;C00080	C05270;C00006	MECR;PECR
3380	R07162	1.3.1.38	TRUE	hsa00062	C00040 + C00006 <=> C00658 + C00005 + C00080	C00040;C00006	C00658;C00005;C00080	MECR
3553	R07761	1.3.1.38	FALSE	hsa01040	C16218 + C00005 + C00080 <=> C00412 + C00006	C16218;C00005;C00080	C00412;C00006	PECR
3554	R07761	1.3.1.38	FALSE	hsa01100	C16218 + C00005 + C00080 <=> C00412 + C00006	C16218;C00005;C00080	C00412;C00006	MECR;PECR
4095	R07162	1.3.1.38	FALSE	hsa00061	C00040 + C00006 <=> C00658 + C00005 + C00080	C00040;C00006	C00658;C00005;C00080	MECR;CGI-63;DYTOABG;ETR1;FASN2B;NRBF1
4096	R01278	1.3.1.38	FALSE	hsa00061	C00154 + C00006 <=> C05272 + C00005 + C00080	C00154;C00006	C05272;C00005;C00080	MECR;CGI-63;DYTOABG;ETR1;FASN2B;NRBF1
4097	R03776	1.3.1.38	FALSE	hsa00061	C01944 + C00006 <=> C05276 + C00005 + C00080	C01944;C00006	C05276;C00005;C00080	MECR;CGI-63;DYTOABG;ETR1;FASN2B;NRBF1
4098	R03856	1.3.1.38	FALSE	hsa00061	C01832 + C00006 <=> C03221 + C00005 + C00080	C01832;C00006	C03221;C00005;C00080	MECR;CGI-63;DYTOABG;ETR1;FASN2B;NRBF1
4099	R03989	1.3.1.38	FALSE	hsa00061	C02593 + C00006 <=> C05273 + C00005 + C00080	C02593;C00006	C05273;C00005;C00080	MECR;CGI-63;DYTOABG;ETR1;FASN2B;NRBF1
4100	R04753	1.3.1.38	FALSE	hsa00061	C05274 + C00006 <=> C05275 + C00005 + C00080	C05274;C00006	C05275;C00005;C00080	MECR;CGI-63;DYTOABG;ETR1;FASN2B;NRBF1
4101	R06985	1.3.1.38	FALSE	hsa00061	C05271 + C00005 + C00080 <=> C05270 + C00006	C05271;C00005;C00080	C05270;C00006	MECR;CGI-63;DYTOABG;ETR1;FASN2B;NRBF1
4104	R04014	3.1.2.21	TRUE	hsa00061	C05223 + C00001 <=> C00229 + C02679	C05223;C00001	C00229;C02679	OLAH;AURA1;SAST;TE2;THEDC1
4105	R08157	3.1.2.21	TRUE	hsa00061	C05752 + C00001 <=> C00229 + C06423	C05752;C00001	C00229;C06423	OLAH;AURA1;SAST;TE2;THEDC1
4106	R08158	3.1.2.21	TRUE	hsa00061	C05755 + C00001 <=> C00229 + C01571	C05755;C00001	C00229;C01571	OLAH;AURA1;SAST;TE2;THEDC1
4107	R12329	3.1.2.21	TRUE	hsa00061	C20683 + C00001 <=> C00229 + C00638	C20683;C00001	C00229;C00638	OLAH;AURA1;SAST;TE2;THEDC1
274	R00390	6.2.1.3	TRUE		C00002 + C00347 + C00010 <=> C00020 + C00013 + C00040	C00002;C00347;C00010	C00020;C00013;C00040	SLC27A2;ACSL1;ACSL3;ACSL4;ACSBG1;ACSL6;ACSL5;ACSBG2
908	R01280	6.2.1.3	FALSE	hsa00071	C00002 + C00249 + C00010 <=> C00020 + C00154 + C00013	C00002;C00249;C00010	C00020;C00154;C00013	ACSL1;ACSL3;ACSL4;ACSBG1;ACSL6;ACSL5;ACSBG2
909	R01280	6.2.1.3	FALSE	hsa01100	C00002 + C00249 + C00010 <=> C00020 + C00154 + C00013	C00002;C00249;C00010	C00020;C00154;C00013	ACSL1;ACSL3;ACSL4;ACSBG1;ACSL6;ACSL5;ACSBG2
4102	R00390	6.2.1.3	TRUE	hsa00061	C00002 + C00638 + C00010 <=> C00020 + C00013 + C02843	C00002;C00638;C00010	C00020;C00013;C02843	ACSL1;ACS1;FACL1;FACL2;LACS;LACS1;LACS2
4103	R01280	6.2.1.3	TRUE	hsa00061	C00002 + C00249 + C00010 <=> C00020 + C00154 + C00013	C00002;C00249;C00010	C00020;C00154;C00013	ACSL1;ACS1;FACL1;FACL2;LACS;LACS1;LACS2
Rid	EC	Irreversible	Pathway	Rid.1	C_in	C_out	Gene_symbol
274	R00390	6.2.1.3	TRUE		C00002 + C00347 + C00010 <=> C00020 + C00013 + C00040	C00002;C00347;C00010	C00020;C00013;C00040	SLC27A2;ACSL1;ACSL3;ACSL4;ACSBG1;ACSL6;ACSL5;ACSBG2
908	R01280	6.2.1.3	FALSE	hsa00071	C00002 + C00249 + C00010 <=> C00020 + C00154 + C00013	C00002;C00249;C00010	C00020;C00154;C00013	ACSL1;ACSL3;ACSL4;ACSBG1;ACSL6;ACSL5;ACSBG2
909	R01280	6.2.1.3	FALSE	hsa01100	C00002 + C00249 + C00010 <=> C00020 + C00154 + C00013	C00002;C00249;C00010	C00020;C00154;C00013	ACSL1;ACSL3;ACSL4;ACSBG1;ACSL6;ACSL5;ACSBG2
4102	R00390	6.2.1.3	TRUE	hsa00061	C00002 + C00638 + C00010 <=> C00020 + C00013 + C02843	C00002;C00638;C00010	C00020;C00013;C02843	ACSL1;ACS1;FACL1;FACL2;LACS;LACS1;LACS2
4103	R01280	6.2.1.3	TRUE	hsa00061	C00002 + C00249 + C00010 <=> C00020 + C00154 + C00013	C00002;C00249;C00010	C00020;C00154;C00013	ACSL1;ACS1;FACL1;FACL2;LACS;LACS1;LACS2
1278	R01923	2.3.1.21	TRUE	hsa00071	C00154 + C00318 <=> C00010 + C02990	C00154;C00318	C00010;C02990	CPT1C;CPT1A;CPT1B;CPT2
272	R00388	1.3.3.6	TRUE		C00040 + C00007 <=> C00658 + C00027	C00040;C00007	C00658;C00027	ACOX1;ACOX3
826	R01175	1.3.3.6	FALSE	hsa00071	C00136 + C00016 <=> C01352 + C00877	C00136;C00016	C01352;C00877	ACOX1;ACOX3
830	R01175	1.3.3.6	FALSE	hsa01100	C00136 + C00016 <=> C01352 + C00877	C00136;C00016	C01352;C00877	ACOX1;ACOX3
900	R01279	1.3.3.6	FALSE	hsa00071	C00154 + C00016 <=> C05272 + C01352	C00154;C00016	C05272;C01352	ACOX1;ACOX3
904	R01279	1.3.3.6	FALSE	hsa01100	C00154 + C00016 <=> C05272 + C01352	C00154;C00016	C05272;C01352	ACOX1;ACOX3
2141	R03777	1.3.3.6	FALSE	hsa00071	C01944 + C00016 <=> C05276 + C01352	C01944;C00016	C05276;C01352	ACOX1;ACOX3
2144	R03777	1.3.3.6	FALSE	hsa01100	C01944 + C00016 <=> C05276 + C01352	C01944;C00016	C05276;C01352	ACOX1;ACOX3
2174	R03857	1.3.3.6	FALSE	hsa00071	C01832 + C00016 <=> C03221 + C01352	C01832;C00016	C03221;C01352	ACOX1;ACOX3
2177	R03857	1.3.3.6	FALSE	hsa01100	C01832 + C00016 <=> C03221 + C01352	C01832;C00016	C03221;C01352	ACOX1;ACOX3
2226	R03990	1.3.3.6	FALSE	hsa00071	C02593 + C00016 <=> C05273 + C01352	C02593;C00016	C05273;C01352	ACOX1;ACOX3
2230	R03990	1.3.3.6	FALSE	hsa01100	C02593 + C00016 <=> C05273 + C01352	C02593;C00016	C05273;C01352	ACOX1;ACOX3
2575	R04751	1.3.3.6	FALSE	hsa00071	C05270 + C00016 <=> C05271 + C01352	C05270;C00016	C05271;C01352	ACOX1;ACOX3
2579	R04751	1.3.3.6	FALSE	hsa01100	C05270 + C00016 <=> C05271 + C01352	C05270;C00016	C05271;C01352	ACOX1;ACOX3
2585	R04754	1.3.3.6	FALSE	hsa00071	C05274 + C00016 <=> C05275 + C01352	C05274;C00016	C05275;C01352	ACOX1;ACOX3
2588	R04754	1.3.3.6	FALSE	hsa01100	C05274 + C00016 <=> C05275 + C01352	C05274;C00016	C05275;C01352	ACOX1;ACOX3
3610	R07888	1.3.3.6	FALSE	hsa00592	C16327 + C00016 <=> C16328 + C01352	C16327;C00016	C16328;C01352	ACOX1;ACOX3
3611	R07888	1.3.3.6	FALSE	hsa01100	C16327 + C00016 <=> C16328 + C01352	C16327;C00016	C16328;C01352	ACOX1;ACOX3
3617	R07892	1.3.3.6	FALSE	hsa00592	C16331 + C00016 <=> C16332 + C01352	C16331;C00016	C16332;C01352	ACOX1;ACOX3
3618	R07892	1.3.3.6	FALSE	hsa01100	C16331 + C00016 <=> C16332 + C01352	C16331;C00016	C16332;C01352	ACOX1;ACOX3
3624	R07896	1.3.3.6	FALSE	hsa00592	C16335 + C00016 <=> C16336 + C01352	C16335;C00016	C16336;C01352	ACOX1;ACOX3
3625	R07896	1.3.3.6	FALSE	hsa01100	C16335 + C00016 <=> C16336 + C01352	C16335;C00016	C16336;C01352	ACOX1;ACOX3
3631	R07934	1.3.3.6	FALSE	hsa01040	C16168 + C00016 <=> C16374 + C01352	C16168;C00016	C16374;C01352	ACOX1;ACOX3
3645	R07950	1.3.3.6	FALSE	hsa01040	C16172 + C00016 <=> C16387 + C01352	C16172;C00016	C16387;C01352	ACOX1;ACOX3
4066	R00388	1.3.3.6	FALSE	hsa00640	C00040 + C00007 <=> C00658 + C00027	C00040;C00007	C00658;C00027	ACOX1;ACOX;PALMCOX;SCOX
4067	R07934	1.3.3.6	FALSE	hsa00640	C16168 + C00007 <=> C16374 + C00027	C16168;C00007	C16374;C00027	ACOX1;ACOX;PALMCOX;SCOX
4068	R07950	1.3.3.6	FALSE	hsa00640	C16172 + C00007 <=> C16387 + C00027	C16172;C00007	C16387;C00027	ACOX1;ACOX;PALMCOX;SCOX
4069	R01175	1.3.3.6	FALSE	hsa00640	C00136 + C00016 <=> C01352 + C00877	C00136;C00016	C01352;C00877	ACOX1;ACOX;PALMCOX;SCOX
4070	R01279	1.3.3.6	FALSE	hsa00640	C00154 + C00016 <=> C05272 + C01352	C00154;C00016	C05272;C01352	ACOX1;ACOX;PALMCOX;SCOX
4071	R03777	1.3.3.6	FALSE	hsa00640	C01944 + C00016 <=> C05276 + C01352	C01944;C00016	C05272;C01352	ACOX1;ACOX;PALMCOX;SCOX
4072	R03857	1.3.3.6	FALSE	hsa00640	C01832 + C00016 <=> C03221 + C01352	C01832;C00016	C03221;C01352	ACOX1;ACOX;PALMCOX;SCOX
4073	R03990	1.3.3.6	FALSE	hsa00640	C02593 + C00016 <=> C05273 + C01352	C02593;C00016	C05273;C01352	ACOX1;ACOX;PALMCOX;SCOX
4074	R04751	1.3.3.6	FALSE	hsa00640	C05270 + C00016 <=> C05271 + C01352	C05270;C00016	C05271;C01352	ACOX1;ACOX;PALMCOX;SCOX
4075	R04754	1.3.3.6	FALSE	hsa00640	C05274 + C00016 <=> C05275 + C01352	C05274;C00016	C05275;C01352	ACOX1;ACOX;PALMCOX;SCOX
4076	R07888	1.3.3.6	FALSE	hsa00640	C16327 + C00016 <=> C16328 + C01352	C16327;C00016	C16328;C01352	ACOX1;ACOX;PALMCOX;SCOX
4077	R07892	1.3.3.6	FALSE	hsa00640	C16331 + C00016 <=> C16332 + C01352	C16331;C00016	C16332;C01352	ACOX1;ACOX;PALMCOX;SCOX
4078	R07896	1.3.3.6	FALSE	hsa00640	C16335 + C00016 <=> C16336 + C01352	C16335;C00016	C16336;C01352	ACOX1;ACOX;PALMCOX;SCOX
4079	R12356	1.3.3.6	FALSE	hsa00640	C00100 + C00007 <=> C00894 + C00027	C00100;C00007	C00894;C00027	ACOX1;ACOX;PALMCOX;SCOX
276	R00392	1.3.8.7	NA		C00040 + C04253 <=> C00605 + C04570	C00040;C04253	C00605;C04570	ACADM
614	R00924	1.3.8.7	NA	hsa00410	C00100 + C00016 <=> C01352 + C00894	C00100;C00016	C01352;C00894	ACADM
828	R01175	1.3.8.7	NA	hsa00071	C00136 + C00016 <=> C01352 + C00877	C00136;C00016	C01352;C00877	ACADM
832	R01175	1.3.8.7	NA	hsa01100	C00136 + C00016 <=> C01352 + C00877	C00136;C00016	C01352;C00877	ACADM
901	R01279	1.3.8.7	NA	hsa00071	C00154 + C00016 <=> C05272 + C01352	C00154;C00016	C05272;C01352	ACADM
905	R01279	1.3.8.7	NA	hsa01100	C00154 + C00016 <=> C05272 + C01352	C00154;C00016	C05272;C01352	ACADM
1682	R02661	1.3.8.7	NA	hsa00280	C00630 + C00028 <=> C03460 + C00030	C00630;C00028	C03460;C00030	ACADM
1686	R02661	1.3.8.7	NA	hsa01100	C00630 + C00028 <=> C03460 + C00030	C00630;C00028	C03460;C00030	ACADM
1905	R03172	1.3.8.7	NA	hsa00280	C15980 + C00028 <=> C03345 + C00030	C15980;C00028	C03345;C00030	ACADM
1908	R03172	1.3.8.7	NA	hsa01100	C15980 + C00028 <=> C03345 + C00030	C15980;C00028	C03345;C00030	ACADM
2142	R03777	1.3.8.7	NA	hsa00071	C01944 + C00016 <=> C05276 + C01352	C01944;C00016	C05276;C01352	ACADM
2145	R03777	1.3.8.7	NA	hsa01100	C01944 + C00016 <=> C05276 + C01352	C01944;C00016	C05276;C01352	ACADM
2175	R03857	1.3.8.7	NA	hsa00071	C01832 + C00016 <=> C03221 + C01352	C01832;C00016	C03221;C01352	ACADM
2178	R03857	1.3.8.7	NA	hsa01100	C01832 + C00016 <=> C03221 + C01352	C01832;C00016	C03221;C01352	ACADM
2227	R03990	1.3.8.7	NA	hsa00071	C02593 + C00016 <=> C05273 + C01352	C02593;C00016	C05273;C01352	ACADM
2231	R03990	1.3.8.7	NA	hsa01100	C02593 + C00016 <=> C05273 + C01352	C02593;C00016	C05273;C01352	ACADM
2261	R04095	1.3.8.7	NA	hsa00280	C02939 + C00016 <=> C03069 + C01352	C02939;C00016	C03069;C01352	ACADM
2263	R04095	1.3.8.7	NA	hsa01100	C02939 + C00016 <=> C03069 + C01352	C02939;C00016	C03069;C01352	ACADM
2393	R04432	1.3.8.7	NA	hsa00640	C04253 + C00100 <=> C04570 + C00894	C04253;C00100	C04570;C00894	ACADM
2394	R04432	1.3.8.7	NA	hsa01100	C04253 + C00100 <=> C04570 + C00894	C04253;C00100	C04570;C00894	ACADM
2577	R04751	1.3.8.7	NA	hsa00071	C05270 + C00016 <=> C05271 + C01352	C05270;C00016	C05271;C01352	ACADM
2581	R04751	1.3.8.7	NA	hsa01100	C05270 + C00016 <=> C05271 + C01352	C05270;C00016	C05271;C01352	ACADM
2586	R04754	1.3.8.7	NA	hsa00071	C05274 + C00016 <=> C05275 + C01352	C05274;C00016	C05275;C01352	ACADM
2589	R04754	1.3.8.7	NA	hsa01100	C05274 + C00016 <=> C05275 + C01352	C05274;C00016	C05275;C01352	ACADM
277	R00392	1.3.8.8	NA		C00040 + C04253 <=> C00605 + C04570	C00040;C04253	C00605;C04570	ACADL
902	R01279	1.3.8.8	NA	hsa00071	C00154 + C00016 <=> C05272 + C01352	C00154;C00016	C05272;C01352	ACADL
906	R01279	1.3.8.8	NA	hsa01100	C00154 + C00016 <=> C05272 + C01352	C00154;C00016	C05272;C01352	ACADL
2143	R03777	1.3.8.8	NA	hsa00071	C01944 + C00016 <=> C05276 + C01352	C01944;C00016	C05276;C01352	ACADL
2146	R03777	1.3.8.8	NA	hsa01100	C01944 + C00016 <=> C05276 + C01352	C01944;C00016	C05276;C01352	ACADL
2176	R03857	1.3.8.8	NA	hsa00071	C01832 + C00016 <=> C03221 + C01352	C01832;C00016	C03221;C01352	ACADL
2179	R03857	1.3.8.8	NA	hsa01100	C01832 + C00016 <=> C03221 + C01352	C01832;C00016	C03221;C01352	ACADL
2228	R03990	1.3.8.8	NA	hsa00071	C02593 + C00016 <=> C05273 + C01352	C02593;C00016	C05273;C01352	ACADL
2232	R03990	1.3.8.8	NA	hsa01100	C02593 + C00016 <=> C05273 + C01352	C02593;C00016	C05273;C01352	ACADL
2578	R04751	1.3.8.8	NA	hsa00071	C05270 + C00016 <=> C05271 + C01352	C05270;C00016	C05271;C01352	ACADL
2582	R04751	1.3.8.8	NA	hsa01100	C05270 + C00016 <=> C05271 + C01352	C05270;C00016	C05271;C01352	ACADL
2587	R04754	1.3.8.8	NA	hsa00071	C05274 + C00016 <=> C05275 + C01352	C05274;C00016	C05275;C01352	ACADL
2590	R04754	1.3.8.8	NA	hsa01100	C05274 + C00016 <=> C05275 + C01352	C05274;C00016	C05275;C01352	ACADL
903	R01279	1.3.8.9	NA	hsa00071	C00154 + C00016 <=> C05272 + C01352	C00154;C00016	C05272;C01352	ACADVL
907	R01279	1.3.8.9	NA	hsa01100	C00154 + C00016 <=> C05272 + C01352	C00154;C00016	C05272;C01352	ACADVL
2229	R03990	1.3.8.9	NA	hsa00071	C02593 + C00016 <=> C05273 + C01352	C02593;C00016	C05273;C01352	ACADVL
2233	R03990	1.3.8.9	NA	hsa01100	C02593 + C00016 <=> C05273 + C01352	C02593;C00016	C05273;C01352	ACADVL
827	R01175	1.3.8.1	NA	hsa00071	C00136 + C00016 <=> C01352 + C00877	C00136;C00016	C01352;C00877	ACADS
829	R01175	1.3.8.1	NA	hsa00650	C00136 + C00016 <=> C01352 + C00877	C00136;C00016	C01352;C00877	ACADS
831	R01175	1.3.8.1	NA	hsa01100	C00136 + C00016 <=> C01352 + C00877	C00136;C00016	C01352;C00877	ACADS
841	R01178	1.3.8.1	NA		C20675 + C04253 <=> C20676 + C04570	C20675;C04253	C20676;C04570	ACADS
1681	R02661	1.3.8.1	NA	hsa00280	C00630 + C00028 <=> C03460 + C00030	C00630;C00028	C03460;C00030	ACADS
1685	R02661	1.3.8.1	NA	hsa01100	C00630 + C00028 <=> C03460 + C00030	C00630;C00028	C03460;C00030	ACADS
1904	R03172	1.3.8.1	NA	hsa00280	C15980 + C00028 <=> C03345 + C00030	C15980;C00028	C03345;C00030	ACADS
1907	R03172	1.3.8.1	NA	hsa01100	C15980 + C00028 <=> C03345 + C00030	C15980;C00028	C03345;C00030	ACADS
2576	R04751	1.3.8.1	NA	hsa00071	C05270 + C00016 <=> C05271 + C01352	C05270;C00016	C05271;C01352	ACADS
2580	R04751	1.3.8.1	NA	hsa01100	C05270 + C00016 <=> C05271 + C01352	C05270;C00016	C05271;C01352	ACADS
4060	R01178	1.3.8.1	FALSE	hsa00640	C20675 + C04253 <=> C20676 + C04570	C20675;C04253	C20676;C04570	ACADS;ACAD3;SCAD
4061	R01175	1.3.8.1	FALSE	hsa00640	C00136 + C00016 <=> C01352 + C00877	C00136;C00016	C01352;C00877	ACADS;ACAD3;SCAD
4062	R04751	1.3.8.1	FALSE	hsa00640	C05270 + C00016 <=> C05271 + C01352	C05270;C00016	C05271;C01352	ACADS;ACAD3;SCAD
4063	R02661	1.3.8.1	FALSE	hsa00640	C00630 + C00028 <=> C03460 + C00030	C00630;C00028	C03460;C00030	ACADS;ACAD3;SCAD
4064	R03172	1.3.8.1	FALSE	hsa00640	C15980 + C00028 <=> C03345 + C00030	C15980;C00028	C03345;C00030	ACADS;ACAD3;SCAD
4065	R04432	1.3.8.1	FALSE	hsa00640	C04253 + C00100 <=> C04570 + C00894	C04253;C00100	C04570;C00894	ACADS;ACAD3;SCAD
1683	R02661	1.3.99.12	FALSE	hsa00280	C00630 + C00028 <=> C03460 + C00030	C00630;C00028	C03460;C00030	ACADSB
1687	R02661	1.3.99.12	FALSE	hsa01100	C00630 + C00028 <=> C03460 + C00030	C00630;C00028	C03460;C00030	ACADSB
1906	R03172	1.3.99.12	FALSE	hsa00280	C15980 + C00028 <=> C03345 + C00030	C15980;C00028	C03345;C00030	ACADSB
1909	R03172	1.3.99.12	FALSE	hsa01100	C15980 + C00028 <=> C03345 + C00030	C15980;C00028	C03345;C00030	ACADSB
1910	R03173	1.3.99.12	TRUE		C01033 + C00028 <=> C03345 + C00030	C01033;C00028	C03345;C00030	ACADSB
4092	R03173	1.3.99.12	TRUE	hsa00071	C01033 + C00028 <=> C03345 + C00030	C01033;C00028	C03345;C00030	ACADSB;2-MEBCAD;ACAD7;SBCAD
4093	R03172	1.3.99.12	TRUE	hsa00071	C15980 + C00028 <=> C03345 + C00030	C15980;C00028	C03345;C00030	ACADSB;2-MEBCAD;ACAD7;SBCAD
4094	R02661	1.3.99.12	TRUE	hsa00071	C00630 + C00028 <=> C03460 + C00030	C00630;C00028	C03460;C00030	ACADSB;2-MEBCAD;ACAD7;SBCAD
1586	R02487	1.3.8.6	NA	hsa00071	C00527 + C00016 <=> C01352 + C00877 + C00011	C00527;C00016	C01352;C00877;C00011	GCDH
1587	R02488	1.3.8.6	NA	hsa00310	C00527 + C04253 <=> C00877 + C04570 + C00011	C00527;C04253	C00877;C04570;C00011	GCDH
1588	R02488	1.3.8.6	NA	hsa00380	C00527 + C04253 <=> C00877 + C04570 + C00011	C00527;C04253	C00877;C04570;C00011	GCDH
1589	R02488	1.3.8.6	NA	hsa01100	C00527 + C04253 <=> C00877 + C04570 + C00011	C00527;C04253	C00877;C04570;C00011	GCDH
4002	R10074	1.3.8.6	NA		C00527 + C04253 <=> C02411 + C04570	C00527;C04253	C02411;C04570	GCDH
1699	R02685	4.2.1.17	TRUE	hsa00062	C00640 <=> C00658 + C00001	C00640	C00658;C00001	ECHS1;HADHA
1850	R03026	4.2.1.17	FALSE	hsa00071	C01144 <=> C00877 + C00001	C01144	C00877;C00001	ECHS1;EHHADH;HADHA
1851	R03026	4.2.1.17	FALSE	hsa00310	C01144 <=> C00877 + C00001	C01144	C00877;C00001	ECHS1;EHHADH;HADHA
1852	R03026	4.2.1.17	FALSE	hsa00380	C01144 <=> C00877 + C00001	C01144	C00877;C00001	ECHS1;EHHADH;HADHA
1853	R03026	4.2.1.17	FALSE	hsa00650	C01144 <=> C00877 + C00001	C01144	C00877;C00001	ECHS1;EHHADH;HADHA
1854	R03026	4.2.1.17	FALSE	hsa01100	C01144 <=> C00877 + C00001	C01144	C00877;C00001	ECHS1;EHHADH;HADHA
1861	R03045	4.2.1.17	FALSE	hsa00410	C05668 <=> C00894 + C00001	C05668	C00894;C00001	ECHS1;EHHADH;HADHA
1862	R03045	4.2.1.17	FALSE	hsa00640	C05668 <=> C00894 + C00001	C05668	C00894;C00001	ECHS1;EHHADH;HADHA
1863	R03045	4.2.1.17	FALSE	hsa01100	C05668 <=> C00894 + C00001	C05668	C00894;C00001	ECHS1;EHHADH;HADHA
1930	R03224	4.2.1.17	FALSE		C01086 <=> C01122 + C00001	C01086	C01122;C00001	ECHS1;EHHADH;HADHA
2276	R04137	4.2.1.17	FALSE	hsa00280	C05998 <=> C03069 + C00001	C05998	C03069;C00001	ECHS1;EHHADH;HADHA
2288	R04170	4.2.1.17	FALSE	hsa00062	C05262 <=> C03221 + C00001	C05262	C03221;C00001	ECHS1;HADHA
2289	R04170	4.2.1.17	FALSE	hsa00071	C05262 <=> C03221 + C00001	C05262	C03221;C00001	ECHS1;EHHADH;HADHA
2290	R04170	4.2.1.17	FALSE	hsa01100	C05262 <=> C03221 + C00001	C05262	C03221;C00001	ECHS1;EHHADH;HADHA
2304	R04204	4.2.1.17	FALSE	hsa00280	C04405 <=> C03345 + C00001	C04405	C03345;C00001	ECHS1;EHHADH;HADHA
2305	R04204	4.2.1.17	FALSE	hsa01100	C04405 <=> C03345 + C00001	C04405	C03345;C00001	ECHS1;EHHADH;HADHA
2314	R04224	4.2.1.17	FALSE	hsa00280	C03460 + C00001 <=> C06000	C03460;C00001	C06000	ECHS1;EHHADH;HADHA
2315	R04224	4.2.1.17	FALSE	hsa01100	C03460 + C00001 <=> C06000	C03460;C00001	C06000	ECHS1;EHHADH;HADHA
2524	R04738	4.2.1.17	FALSE	hsa00062	C05258 <=> C05272 + C00001	C05258	C05272;C00001	ECHS1;HADHA
2525	R04738	4.2.1.17	FALSE	hsa00071	C05258 <=> C05272 + C00001	C05258	C05272;C00001	ECHS1;EHHADH;HADHA
2526	R04738	4.2.1.17	FALSE	hsa01100	C05258 <=> C05272 + C00001	C05258	C05272;C00001	ECHS1;EHHADH;HADHA
2533	R04740	4.2.1.17	FALSE	hsa00062	C05260 <=> C05273 + C00001	C05260	C05273;C00001	ECHS1;HADHA
2534	R04740	4.2.1.17	FALSE	hsa00071	C05260 <=> C05273 + C00001	C05260	C05273;C00001	ECHS1;EHHADH;HADHA
2535	R04740	4.2.1.17	FALSE	hsa01100	C05260 <=> C05273 + C00001	C05260	C05273;C00001	ECHS1;EHHADH;HADHA
2551	R04744	4.2.1.17	FALSE	hsa00062	C05264 <=> C05275 + C00001	C05264	C05275;C00001	ECHS1;HADHA
2552	R04744	4.2.1.17	FALSE	hsa00071	C05264 <=> C05275 + C00001	C05264	C05275;C00001	ECHS1;EHHADH;HADHA
2553	R04744	4.2.1.17	FALSE	hsa01100	C05264 <=> C05275 + C00001	C05264	C05275;C00001	ECHS1;EHHADH;HADHA
2560	R04746	4.2.1.17	FALSE	hsa00062	C05266 <=> C05276 + C00001	C05266	C05276;C00001	ECHS1;HADHA
2561	R04746	4.2.1.17	FALSE	hsa00071	C05266 <=> C05276 + C00001	C05266	C05276;C00001	ECHS1;EHHADH;HADHA
2562	R04746	4.2.1.17	FALSE	hsa01100	C05266 <=> C05276 + C00001	C05266	C05276;C00001	ECHS1;EHHADH;HADHA
2572	R04749	4.2.1.17	FALSE	hsa00062	C05268 <=> C05271 + C00001	C05268	C05271;C00001	ECHS1;HADHA
2573	R04749	4.2.1.17	FALSE	hsa00071	C05268 <=> C05271 + C00001	C05268	C05271;C00001	ECHS1;EHHADH;HADHA
2574	R04749	4.2.1.17	FALSE	hsa01100	C05268 <=> C05271 + C00001	C05268	C05271;C00001	ECHS1;EHHADH;HADHA
2858	R05595	4.2.1.17	FALSE		C00877 + C00001 <=> C05116	C00877;C00001	C05116	ECHS1;EHHADH;HADHA
3253	R06942	4.2.1.17	FALSE	hsa01100	C14144 + C00001 <=> C14145	C14144;C00001	C14145	ECHS1;EHHADH;HADHA
3410	R07314	4.2.1.17	TRUE		C00640 <=> C05067 + C00001	C00640	C05067;C00001	ECHS1;EHHADH;HADHA
3612	R07889	4.2.1.17	FALSE	hsa01100	C16329 <=> C16328 + C00001	C16329	C16328;C00001	ECHS1;EHHADH;HADHA
3619	R07893	4.2.1.17	FALSE	hsa01100	C16333 <=> C16332 + C00001	C16333	C16332;C00001	ECHS1;EHHADH;HADHA
3626	R07897	4.2.1.17	FALSE	hsa01100	C16337 <=> C16336 + C00001	C16337	C16336;C00001	ECHS1;EHHADH;HADHA
1154	R01778	1.1.1.35	TRUE	hsa00062	C00640 + C00003 <=> C00264 + C00004 + C00080	C00640;C00003	C00264;C00004;C00080	HADH
1312	R01975	1.1.1.35	FALSE	hsa00071	C01144 + C00003 <=> C00332 + C00004 + C00080	C01144;C00003	C00332;C00004;C00080	EHHADH;HADH
1313	R01975	1.1.1.35	FALSE	hsa00310	C01144 + C00003 <=> C00332 + C00004 + C00080	C01144;C00003	C00332;C00004;C00080	EHHADH;HADH
1314	R01975	1.1.1.35	FALSE	hsa00380	C01144 + C00003 <=> C00332 + C00004 + C00080	C01144;C00003	C00332;C00004;C00080	EHHADH;HADH
1315	R01975	1.1.1.35	FALSE	hsa00650	C01144 + C00003 <=> C00332 + C00004 + C00080	C01144;C00003	C00332;C00004;C00080	EHHADH;HADH
1316	R01975	1.1.1.35	FALSE	hsa01100	C01144 + C00003 <=> C00332 + C00004 + C00080	C01144;C00003	C00332;C00004;C00080	EHHADH;HSD17B10;HADH;HSD17B4
2300	R04203	1.1.1.35	FALSE	hsa00280	C04405 + C00003 <=> C03344 + C00004 + C00080	C04405;C00003	C03344;C00004;C00080	EHHADH;HSD17B10;HADH
2302	R04203	1.1.1.35	FALSE	hsa01100	C04405 + C00003 <=> C03344 + C00004 + C00080	C04405;C00003	C03344;C00004;C00080	EHHADH;HSD17B10;HADH;HSD17B4
2518	R04737	1.1.1.35	FALSE	hsa00062	C05258 + C00003 <=> C05259 + C00004 + C00080	C05258;C00003	C05259;C00004;C00080	HADH
2520	R04737	1.1.1.35	FALSE	hsa00071	C05258 + C00003 <=> C05259 + C00004 + C00080	C05258;C00003	C05259;C00004;C00080	EHHADH;HADH
2522	R04737	1.1.1.35	FALSE	hsa01100	C05258 + C00003 <=> C05259 + C00004 + C00080	C05258;C00003	C05259;C00004;C00080	EHHADH;HSD17B10;HADH;HSD17B4
2527	R04739	1.1.1.35	FALSE	hsa00062	C05260 + C00003 <=> C05261 + C00004	C05260;C00003	C05261;C00004	HADH
2529	R04739	1.1.1.35	FALSE	hsa00071	C05260 + C00003 <=> C05261 + C00004	C05260;C00003	C05261;C00004	EHHADH;HADH
2531	R04739	1.1.1.35	FALSE	hsa01100	C05260 + C00003 <=> C05261 + C00004	C05260;C00003	C05261;C00004	EHHADH;HSD17B10;HADH;HSD17B4
2536	R04741	1.1.1.35	FALSE	hsa00062	C05262 + C00003 <=> C05263 + C00004 + C00080	C05262;C00003	C05263;C00004;C00080	HADH
2538	R04741	1.1.1.35	FALSE	hsa00071	C05262 + C00003 <=> C05263 + C00004 + C00080	C05262;C00003	C05263;C00004;C00080	EHHADH;HADH
2540	R04741	1.1.1.35	FALSE	hsa01100	C05262 + C00003 <=> C05263 + C00004 + C00080	C05262;C00003	C05263;C00004;C00080	EHHADH;HSD17B10;HADH;HSD17B4
2545	R04743	1.1.1.35	FALSE	hsa00062	C05264 + C00003 <=> C05265 + C00004 + C00080	C05264;C00003	C05265;C00004;C00080	HADH
2547	R04743	1.1.1.35	FALSE	hsa00071	C05264 + C00003 <=> C05265 + C00004 + C00080	C05264;C00003	C05265;C00004;C00080	EHHADH;HADH
2549	R04743	1.1.1.35	FALSE	hsa01100	C05264 + C00003 <=> C05265 + C00004 + C00080	C05264;C00003	C05265;C00004;C00080	EHHADH;HSD17B10;HADH;HSD17B4
2554	R04745	1.1.1.35	FALSE	hsa00062	C05266 + C00003 <=> C05267 + C00004 + C00080	C05266;C00003	C05267;C00004;C00080	HADH
2556	R04745	1.1.1.35	FALSE	hsa00071	C05266 + C00003 <=> C05267 + C00004 + C00080	C05266;C00003	C05267;C00004;C00080	EHHADH;HADH
2558	R04745	1.1.1.35	FALSE	hsa01100	C05266 + C00003 <=> C05267 + C00004 + C00080	C05266;C00003	C05267;C00004;C00080	EHHADH;HSD17B10;HADH;HSD17B4
2566	R04748	1.1.1.35	FALSE	hsa00062	C05268 + C00003 <=> C05269 + C00004 + C00080	C05268;C00003	C05269;C00004;C00080	HADH
2568	R04748	1.1.1.35	FALSE	hsa00071	C05268 + C00003 <=> C05269 + C00004 + C00080	C05268;C00003	C05269;C00004;C00080	EHHADH;HADH
2570	R04748	1.1.1.35	FALSE	hsa01100	C05268 + C00003 <=> C05269 + C00004 + C00080	C05268;C00003	C05269;C00004;C00080	EHHADH;HSD17B10;HADH;HSD17B4
2622	R04810	1.1.1.35	FALSE	hsa00120	C05448 + C00003 <=> C05449 + C00004 + C00080	C05448;C00003	C05449;C00004;C00080	HSD17B4
2623	R04810	1.1.1.35	FALSE	hsa01100	C05448 + C00003 <=> C05449 + C00004 + C00080	C05448;C00003	C05449;C00004;C00080	EHHADH;HSD17B10;HADH;HSD17B4
2626	R04812	1.1.1.35	FALSE	hsa00120	C05450 + C00003 <=> C05467 + C00004 + C00080	C05450;C00003	C05467;C00004;C00080	HSD17B4
2627	R04812	1.1.1.35	FALSE	hsa01100	C05450 + C00003 <=> C05467 + C00004 + C00080	C05450;C00003	C05467;C00004;C00080	EHHADH;HSD17B10;HADH;HSD17B4
2785	R05066	1.1.1.35	FALSE	hsa00280	C06001 + C00003 <=> C06002 + C00004 + C00080	C06001;C00003	C06002;C00004;C00080	EHHADH;HSD17B10;HADH
2787	R05066	1.1.1.35	FALSE	hsa01100	C06001 + C00003 <=> C06002 + C00004 + C00080	C06001;C00003	C06002;C00004;C00080	EHHADH;HSD17B10;HADH;HSD17B4
2851	R05575	1.1.1.35	FALSE	hsa01100	C09819 + C00003 <=> C09820 + C00004 + C00080	C09819;C00003	C09820;C00004;C00080	EHHADH;HSD17B10;HADH;HSD17B4
3252	R06941	1.1.1.35	FALSE	hsa01100	C14145 + C00003 <=> C02232 + C00004 + C00080	C14145;C00003	C02232;C00004;C00080	EHHADH;HSD17B10;HADH;HSD17B4
3613	R07890	1.1.1.35	FALSE	hsa01100	C16329 + C00003 <=> C16330 + C00004 + C00080	C16329;C00003	C16330;C00004;C00080	EHHADH;HSD17B10;HADH;HSD17B4
3620	R07894	1.1.1.35	FALSE	hsa01100	C16333 + C00003 <=> C16334 + C00004 + C00080	C16333;C00003	C16334;C00004;C00080	EHHADH;HSD17B10;HADH;HSD17B4
3627	R07898	1.1.1.35	FALSE	hsa01100	C16337 + C00003 <=> C16338 + C00004 + C00080	C16337;C00003	C16338;C00004;C00080	EHHADH;HSD17B10;HADH;HSD17B4
1155	R01778	1.1.1.211	TRUE	hsa00062	C00640 + C00003 <=> C00264 + C00004 + C00080	C00640;C00003	C00264;C00004;C00080	HADHA
2519	R04737	1.1.1.211	FALSE	hsa00062	C05258 + C00003 <=> C05259 + C00004 + C00080	C05258;C00003	C05259;C00004;C00080	HADHA
2521	R04737	1.1.1.211	FALSE	hsa00071	C05258 + C00003 <=> C05259 + C00004 + C00080	C05258;C00003	C05259;C00004;C00080	HADHA
2523	R04737	1.1.1.211	FALSE	hsa01100	C05258 + C00003 <=> C05259 + C00004 + C00080	C05258;C00003	C05259;C00004;C00080	HADHA
2528	R04739	1.1.1.211	FALSE	hsa00062	C05260 + C00003 <=> C05261 + C00004	C05260;C00003	C05261;C00004	HADHA
2530	R04739	1.1.1.211	FALSE	hsa00071	C05260 + C00003 <=> C05261 + C00004	C05260;C00003	C05261;C00004	HADHA
2532	R04739	1.1.1.211	FALSE	hsa01100	C05260 + C00003 <=> C05261 + C00004	C05260;C00003	C05261;C00004	HADHA
2537	R04741	1.1.1.211	FALSE	hsa00062	C05262 + C00003 <=> C05263 + C00004 + C00080	C05262;C00003	C05263;C00004;C00080	HADHA
2539	R04741	1.1.1.211	FALSE	hsa00071	C05262 + C00003 <=> C05263 + C00004 + C00080	C05262;C00003	C05263;C00004;C00080	HADHA
2541	R04741	1.1.1.211	FALSE	hsa01100	C05262 + C00003 <=> C05263 + C00004 + C00080	C05262;C00003	C05263;C00004;C00080	HADHA
2546	R04743	1.1.1.211	FALSE	hsa00062	C05264 + C00003 <=> C05265 + C00004 + C00080	C05264;C00003	C05265;C00004;C00080	HADHA
2548	R04743	1.1.1.211	FALSE	hsa00071	C05264 + C00003 <=> C05265 + C00004 + C00080	C05264;C00003	C05265;C00004;C00080	HADHA
2550	R04743	1.1.1.211	FALSE	hsa01100	C05264 + C00003 <=> C05265 + C00004 + C00080	C05264;C00003	C05265;C00004;C00080	HADHA
2555	R04745	1.1.1.211	FALSE	hsa00062	C05266 + C00003 <=> C05267 + C00004 + C00080	C05266;C00003	C05267;C00004;C00080	HADHA
2557	R04745	1.1.1.211	FALSE	hsa00071	C05266 + C00003 <=> C05267 + C00004 + C00080	C05266;C00003	C05267;C00004;C00080	HADHA
2559	R04745	1.1.1.211	FALSE	hsa01100	C05266 + C00003 <=> C05267 + C00004 + C00080	C05266;C00003	C05267;C00004;C00080	HADHA
2567	R04748	1.1.1.211	FALSE	hsa00062	C05268 + C00003 <=> C05269 + C00004 + C00080	C05268;C00003	C05269;C00004;C00080	HADHA
2569	R04748	1.1.1.211	FALSE	hsa00071	C05268 + C00003 <=> C05269 + C00004 + C00080	C05268;C00003	C05269;C00004;C00080	HADHA
2571	R04748	1.1.1.211	FALSE	hsa01100	C05268 + C00003 <=> C05269 + C00004 + C00080	C05268;C00003	C05269;C00004;C00080	HADHA
3614	R07890	1.1.1.211	FALSE	hsa01100	C16329 + C00003 <=> C16330 + C00004 + C00080	C16329;C00003	C16330;C00004;C00080	HADHA
3621	R07894	1.1.1.211	FALSE	hsa01100	C16333 + C00003 <=> C16334 + C00004 + C00080	C16333;C00003	C16334;C00004;C00080	HADHA
3628	R07898	1.1.1.211	FALSE	hsa01100	C16337 + C00003 <=> C16338 + C00004 + C00080	C16337;C00003	C16338;C00004;C00080	HADHA
3632	R07936	1.1.1.211	FALSE	hsa01040	C16375 + C00003 <=> C16376 + C00004 + C00080	C16375;C00003	C16376;C00004;C00080	HADHA
3646	R07952	1.1.1.211	FALSE	hsa01040	C16388 + C00003 <=> C16389 + C00004 + C00080	C16388;C00003	C16389;C00004;C00080	HADHA
275	R00391	2.3.1.16	TRUE	hsa00062	C00040 + C00024 <=> C00010 + C00264	C00040;C00024	C00010;C00264	ACAA2;HADHB
622	R00927	2.3.1.16	FALSE	hsa00280	C00100 + C00024 <=> C00010 + C03344	C00100;C00024	C00010;C03344	ACAA2;ACAA1;HADHB
624	R00927	2.3.1.16	FALSE	hsa01100	C00100 + C00024 <=> C00010 + C03344	C00100;C00024	C00010;C03344	ACAA2;ACAA1;HADHB
836	R01177	2.3.1.16	FALSE	hsa00062	C00024 + C00136 <=> C00010 + C05269	C00024;C00136	C00010;C05269	ACAA2;HADHB
838	R01177	2.3.1.16	FALSE	hsa00071	C00024 + C00136 <=> C00010 + C05269	C00024;C00136	C00010;C05269	ACAA2;ACAA1;HADHB
840	R01177	2.3.1.16	FALSE	hsa01100	C00024 + C00136 <=> C00010 + C05269	C00024;C00136	C00010;C05269	ACAA2;ACAA1;HADHB
2148	R03778	2.3.1.16	FALSE	hsa00062	C01944 + C00024 <=> C00010 + C05265	C01944;C00024	C00010;C05265	ACAA2;HADHB
2149	R03778	2.3.1.16	FALSE	hsa00071	C01944 + C00024 <=> C00010 + C05265	C01944;C00024	C00010;C05265	ACAA2;ACAA1;HADHB
2150	R03778	2.3.1.16	FALSE	hsa01100	C01944 + C00024 <=> C00010 + C05265	C01944;C00024	C00010;C05265	ACAA2;ACAA1;HADHB
2181	R03858	2.3.1.16	FALSE	hsa00062	C01832 + C00024 <=> C00010 + C05261	C01832;C00024	C00010;C05261	ACAA2;HADHB
2182	R03858	2.3.1.16	FALSE	hsa00071	C01832 + C00024 <=> C00010 + C05261	C01832;C00024	C00010;C05261	ACAA2;ACAA1;HADHB
2183	R03858	2.3.1.16	FALSE	hsa01100	C01832 + C00024 <=> C00010 + C05261	C01832;C00024	C00010;C05261	ACAA2;ACAA1;HADHB
2234	R03991	2.3.1.16	FALSE	hsa00062	C02593 + C00024 <=> C00010 + C05259	C02593;C00024	C00010;C05259	ACAA2;HADHB
2235	R03991	2.3.1.16	FALSE	hsa00071	C02593 + C00024 <=> C00010 + C05259	C02593;C00024	C00010;C05259	ACAA2;ACAA1;HADHB
2236	R03991	2.3.1.16	FALSE	hsa01100	C02593 + C00024 <=> C00010 + C05259	C02593;C00024	C00010;C05259	ACAA2;ACAA1;HADHB
2542	R04742	2.3.1.16	FALSE	hsa00062	C05274 + C00024 <=> C00010 + C05263	C05274;C00024	C00010;C05263	ACAA2;HADHB
2543	R04742	2.3.1.16	FALSE	hsa00071	C05274 + C00024 <=> C00010 + C05263	C05274;C00024	C00010;C05263	ACAA2;ACAA1;HADHB
2544	R04742	2.3.1.16	FALSE	hsa01100	C05274 + C00024 <=> C00010 + C05263	C05274;C00024	C00010;C05263	ACAA2;ACAA1;HADHB
2563	R04747	2.3.1.16	FALSE	hsa00062	C05270 + C00024 <=> C00010 + C05267	C05270;C00024	C00010;C05267	ACAA2;HADHB
2564	R04747	2.3.1.16	FALSE	hsa00071	C05270 + C00024 <=> C00010 + C05267	C05270;C00024	C00010;C05267	ACAA2;ACAA1;HADHB
2565	R04747	2.3.1.16	FALSE	hsa01100	C05270 + C00024 <=> C00010 + C05267	C05270;C00024	C00010;C05267	ACAA2;ACAA1;HADHB
3615	R07891	2.3.1.16	FALSE	hsa00592	C16331 + C00024 <=> C00010 + C16330	C16331;C00024	C00010;C16330	ACAA1
3616	R07891	2.3.1.16	FALSE	hsa01100	C16331 + C00024 <=> C00010 + C16330	C16331;C00024	C00010;C16330	ACAA2;ACAA1;HADHB
3622	R07895	2.3.1.16	FALSE	hsa00592	C16335 + C00024 <=> C00010 + C16334	C16335;C00024	C00010;C16334	ACAA1
3623	R07895	2.3.1.16	FALSE	hsa01100	C16335 + C00024 <=> C00010 + C16334	C16335;C00024	C00010;C16334	ACAA2;ACAA1;HADHB
3629	R07899	2.3.1.16	FALSE	hsa00592	C16339 + C00024 <=> C00010 + C16338	C16339;C00024	C00010;C16338	ACAA1
3630	R07899	2.3.1.16	FALSE	hsa01100	C16339 + C00024 <=> C00010 + C16338	C16339;C00024	C00010;C16338	ACAA2;ACAA1;HADHB
3633	R07937	2.3.1.16	FALSE	hsa01040	C16169 + C00024 <=> C00010 + C16376	C16169;C00024	C00010;C16376	ACAA1
3647	R07953	2.3.1.16	FALSE	hsa01040	C16173 + C00024 <=> C00010 + C16389	C16173;C00024	C00010;C16389	ACAA1
140	R00238	2.3.1.9	TRUE	hsa00071	2 C00024 <=> C00010 + C00332	C00024	C00010;C00332	ACAT1;ACAT2
141	R00238	2.3.1.9	TRUE	hsa00072	2 C00024 <=> C00010 + C00332	C00024	C00010;C00332	ACAT1;ACAT2
142	R00238	2.3.1.9	TRUE	hsa00280	2 C00024 <=> C00010 + C00332	C00024	C00010;C00332	ACAT1;ACAT2
143	R00238	2.3.1.9	TRUE	hsa00310	2 C00024 <=> C00010 + C00332	C00024	C00010;C00332	ACAT1;ACAT2
144	R00238	2.3.1.9	TRUE	hsa00380	2 C00024 <=> C00010 + C00332	C00024	C00010;C00332	ACAT1;ACAT2
145	R00238	2.3.1.9	TRUE	hsa00620	2 C00024 <=> C00010 + C00332	C00024	C00010;C00332	ACAT1;ACAT2
146	R00238	2.3.1.9	TRUE	hsa00630	2 C00024 <=> C00010 + C00332	C00024	C00010;C00332	ACAT1;ACAT2
147	R00238	2.3.1.9	TRUE	hsa00640	2 C00024 <=> C00010 + C00332	C00024	C00010;C00332	ACAT1;ACAT2
148	R00238	2.3.1.9	TRUE	hsa00650	2 C00024 <=> C00010 + C00332	C00024	C00010;C00332	ACAT1;ACAT2
149	R00238	2.3.1.9	TRUE	hsa00900	2 C00024 <=> C00010 + C00332	C00024	C00010;C00332	ACAT1;ACAT2
150	R00238	2.3.1.9	TRUE	hsa01100	2 C00024 <=> C00010 + C00332	C00024	C00010;C00332	ACAT1;ACAT2
621	R00927	2.3.1.9	FALSE	hsa00280	C00100 + C00024 <=> C00010 + C03344	C00100;C00024	C00010;C03344	ACAT1;ACAT2
623	R00927	2.3.1.9	FALSE	hsa01100	C00100 + C00024 <=> C00010 + C03344	C00100;C00024	C00010;C03344	ACAT1;ACAT2
837	R01177	2.3.1.9	FALSE	hsa00071	C00024 + C00136 <=> C00010 + C05269	C00024;C00136	C00010;C05269	ACAT1;ACAT2
839	R01177	2.3.1.9	FALSE	hsa01100	C00024 + C00136 <=> C00010 + C05269	C00024;C00136	C00010;C05269	ACAT1;ACAT2
Rid	EC	Irreversible	Pathway	Rid.1	C_in	C_out	Gene_symbol
987	R01397	2.1.3.2	TRUE	hsa00240	C00169 + C00049 <=> C00009 + C00438	C00169;C00049	C00009;C00438	CAD
988	R01397	2.1.3.2	TRUE	hsa00250	C00169 + C00049 <=> C00009 + C00438	C00169;C00049	C00009;C00438	CAD
989	R01397	2.1.3.2	TRUE	hsa01100	C00169 + C00049 <=> C00009 + C00438	C00169;C00049	C00009;C00438	CAD
1328	R01993	3.5.2.3	TRUE	hsa00240	C00337 + C00001 <=> C00438	C00337;C00001	C00438	CAD
1329	R01993	3.5.2.3	TRUE	hsa01100	C00337 + C00001 <=> C00438	C00337;C00001	C00438	CAD
1245	R01868	1.3.5.2	TRUE	hsa00240	C00337 + C15602 <=> C00295 + C15603	C00337;C15602	C00295;C15603	DHODH
1246	R01868	1.3.5.2	TRUE	hsa01100	C00337 + C15602 <=> C00295 + C15603	C00337;C15602	C00295;C15603	DHODH
Rid	EC	Irreversible	Pathway	Rid.1	C_in	C_out	Gene_symbol
331	R00487	2.3.1.17	TRUE	hsa00250	C00024 + C00049 <=> C00010 + C01042	C00024;C00049	C00010;C01042	NAT8L
332	R00488	3.5.1.15	FALSE	hsa00250	C01042 + C00001 <=> C00033 + C00049	C01042;C00001	C00033;C00049	ASPA;ACY3
357	R00526	3.5.1.15	FALSE	hsa00340	C01044 + C00001 <=> C00058 + C00049	C01044;C00001	C00058;C00049	ASPA;ACY3
366	R00546	3.5.1.15	TRUE		C02715 + C00001 <=> C00060 + C00049	C02715;C00001	C00060;C00049	ASPA;ACY3
4051	R10678	6.3.2.41	TRUE	hsa00250	C00002 + C01042 + C00025 <=> C00008 + C00009 + C12270	C00002;C01042;C00025	C00008;C00009;C12270	RIMKLA;FAM80A;NAAGS;NAAGS-II
4052	R10679	6.3.2.42	TRUE	hsa00250	2 C00002 + C01042 + 2 C00025 <=> 2 C00008 + 2 C00009 + C20776	C00002;C01042;C00025	C00008;C00009;C20776	RIMKLA;FAM80A;NAAGS;NAAGS-II
4053	R10678	6.3.2.42	TRUE	hsa00250	C00002 + C01042 + C00025 <=> C00008 + C00009 + C12270	C00002;C01042;C00025	C00008;C00009;C12270	RIMKLA;FAM80A;NAAGS;NAAGS-II
4054	R10693	6.3.2.42	TRUE	hsa00250	C00002 + C12270 + C00025 <=> C00008 + C00009 + C20776	C00002;C12270;C00025	C00008;C00009;C20776	RIMKLA;FAM80A;NAAGS;NAAGS-II
4035	R10687	3.4.17.21	NA		C12270 + C00001 <=> C01042 + C00025	C12270;C00001	C01042;C00025	NAALAD2;NAALADL1;FOLH1
4036	R10688	3.4.17.21	NA		C20776 + C00001 <=> C12270 + C00025	C20776;C00001	C12270;C00025	NAALAD2;NAALADL1;FOLH1
4055	R10687	3.4.17.21	TRUE	hsa00250	C12270 + C00001 <=> C01042 + C00025	C12270;C00001	C01042;C00025	FOLH1;FGCP;FOLH;GCP2;GCPII;NAALAD1;NAALAdase;PSM;PSMA;mGCP
4056	R10688	3.4.17.21	TRUE	hsa00250	C20776 + C00001 <=> C12270 + C00025	C20776;C00001	C12270;C00025	FOLH1;FGCP;FOLH;GCP2;GCPII;NAALAD1;NAALAdase;PSM;PSMA;mGCP
Rid	EC	Irreversible	Pathway	Rid.1	C_in	C_out	Gene_symbol
329	R00483	6.3.5.4	TRUE	hsa00250	C00002 + C00049 + C00014 <=> C00020 + C00013 + C00152	C00002;C00049;C00014	C00020;C00013;C00152	ASNS
330	R00483	6.3.5.4	TRUE	hsa01100	C00002 + C00049 + C00014 <=> C00020 + C00013 + C00152	C00002;C00049;C00014	C00020;C00013;C00152	ASNS
392	R00578	6.3.5.4	TRUE	hsa00250	C00002 + C00049 + C00064 + C00001 <=> C00020 + C00013 + C00152 + C00025	C00002;C00049;C00064;C00001	C00020;C00013;C00152;C00025	ASNS
393	R00578	6.3.5.4	TRUE	hsa01100	C00002 + C00049 + C00064 + C00001 <=> C00020 + C00013 + C00152 + C00025	C00002;C00049;C00064;C00001	C00020;C00013;C00152;C00025	ASNS
3134	R06134	3.5.1.1	FALSE		C00241 + C00001 <=> C00060 + C00014	C00241;C00001	C00060;C00014	ASPG
4057	R00485	3.5.1.1	TRUE	hsa00250	C00152 + C00001 <=> C00049 + C00014	C00152;C00001	C00049 + C00014	ASRGL1;ALP;ALP1;CRASH
4058	R06134	3.5.1.1	TRUE	hsa00250	C00241 + C00001 <=> C00060 + C00014	C00241;C00001	C00060;C00014	ASRGL1;ALP;ALP1;CRASH
Rid	EC	Irreversible	Pathway	Rid.1	C_in	C_out	Gene_symbol
797	R01135	6.3.4.4	TRUE	hsa00230	C00044 + C00130 + C00049 <=> C00035 + C00009 + C03794	C00044;C00130;C00049	C00035;C00009;C03794	ADSSL1;ADSS
798	R01135	6.3.4.4	TRUE	hsa00250	C00044 + C00130 + C00049 <=> C00035 + C00009 + C03794	C00044;C00130;C00049	C00035;C00009;C03794	ADSSL1;ADSS
799	R01135	6.3.4.4	TRUE	hsa01100	C00044 + C00130 + C00049 <=> C00035 + C00009 + C03794	C00044;C00130;C00049	C00035;C00009;C03794	ADSSL1;ADSS
755	R01083	4.3.2.2	TRUE	hsa00230	C03794 <=> C00122 + C00020	C03794	C00122;C00020	ADSL
756	R01083	4.3.2.2	TRUE	hsa00250	C03794 <=> C00122 + C00020	C03794	C00122;C00020	ADSL
757	R01083	4.3.2.2	TRUE	hsa01100	C03794 <=> C00122 + C00020	C03794	C00122;C00020	ADSL
2447	R04559	4.3.2.2	TRUE	hsa00230	C04823 <=> C00122 + C04677	C04823	C00122;C04677	ADSL
2448	R04559	4.3.2.2	TRUE	hsa01100	C04823 <=> C00122 + C04677	C04823	C00122;C04677	ADSL
1291	R01954	6.3.4.5	TRUE	hsa00250	C00002 + C00327 + C00049 <=> C00020 + C00013 + C03406	C00002;C00327;C00049	C00020;C00013;C03406	ASS1
1292	R01954	6.3.4.5	TRUE	hsa00330	C00002 + C00327 + C00049 <=> C00020 + C00013 + C03406	C00002;C00327;C00049	C00020;C00013;C03406	ASS1
1293	R01954	6.3.4.5	TRUE	hsa01100	C00002 + C00327 + C00049 <=> C00020 + C00013 + C03406	C00002;C00327;C00049	C00020;C00013;C03406	ASS1
760	R01086	4.3.2.1	TRUE	hsa00250	C03406 <=> C00122 + C00062	C03406	C00122;C00062	ASL
761	R01086	4.3.2.1	TRUE	hsa00330	C03406 <=> C00122 + C00062	C03406	C00122;C00062	ASL
762	R01086	4.3.2.1	TRUE	hsa01100	C03406 <=> C00122 + C00062	C03406	C00122;C00062	ASL
Rid	EC	Irreversible	Pathway	Rid.1	C_in	C_out	Gene_symbol
248	R00357	1.4.3.2	FALSE	hsa00250	C00049 + C00001 + C00007 <=> C00036 + C00014 + C00027	C00049;C00001;C00007	C00036;C00014;C00027	IL4I1
249	R00357	1.4.3.2	FALSE	hsa01100	C00049 + C00001 + C00007 <=> C00036 + C00014 + C00027	C00049;C00001;C00007	C00036;C00014;C00027	IL4I1
432	R00648	1.4.3.2	FALSE	hsa00270	C00073 + C00001 + C00007 <=> C01180 + C00014 + C00027	C00073;C00001;C00007	C01180;C00014;C00027	IL4I1
433	R00648	1.4.3.2	FALSE	hsa01100	C00073 + C00001 + C00007 <=> C01180 + C00014 + C00027	C00073;C00001;C00007	C01180;C00014;C00027	IL4I1
447	R00677	1.4.3.2	FALSE	hsa00380	C00078 + C00001 + C00007 <=> C00331 + C00014 + C00027	C00078;C00001;C00007	C00331;C00014;C00027	IL4I1
448	R00677	1.4.3.2	FALSE	hsa01100	C00078 + C00001 + C00007 <=> C00331 + C00014 + C00027	C00078;C00001;C00007	C00331;C00014;C00027	IL4I1
455	R00689	1.4.3.2	FALSE	hsa00360	C00079 + C00001 + C00007 <=> C00166 + C00014 + C00027	C00079;C00001;C00007	C00166;C00014;C00027	IL4I1
456	R00689	1.4.3.2	FALSE	hsa00400	C00079 + C00001 + C00007 <=> C00166 + C00014 + C00027	C00079;C00001;C00007	C00166;C00014;C00027	IL4I1
457	R00689	1.4.3.2	FALSE	hsa01100	C00079 + C00001 + C00007 <=> C00166 + C00014 + C00027	C00079;C00001;C00007	C00166;C00014;C00027	IL4I1
512	R00729	1.4.3.2	FALSE	hsa00350	C00082 + C00001 + C00007 <=> C01179 + C00014 + C00027	C00082;C00001;C00007	C01179;C00014;C00027	IL4I1
513	R00729	1.4.3.2	FALSE	hsa00400	C00082 + C00001 + C00007 <=> C01179 + C00014 + C00027	C00082;C00001;C00007	C01179;C00014;C00027	IL4I1
514	R00729	1.4.3.2	FALSE	hsa01100	C00082 + C00001 + C00007 <=> C01179 + C00014 + C00027	C00082;C00001;C00007	C01179;C00014;C00027	IL4I1
886	R01259	1.4.3.2	TRUE		C00151 + C00001 + C00007 <=> C00161 + C00014 + C00027	C00151;C00001;C00007	C00161;C00014;C00027	IL4I1
1439	R02197	1.4.3.2	FALSE	hsa00280	C00407 + C00001 + C00007 <=> C00671 + C00014 + C00027	C00407;C00001;C00007	C00671;C00014;C00027	IL4I1
1440	R02197	1.4.3.2	FALSE	hsa01100	C00407 + C00001 + C00007 <=> C00671 + C00014 + C00027	C00407;C00001;C00007	C00671;C00014;C00027	IL4I1
3124	R06124	1.4.3.2	FALSE		C05167 + C00001 + C00007 <=> C00161 + C00014 + C00027	C05167;C00001;C00007	C00161;C00014;C00027	IL4I1
246	R00355	2.6.1.1	TRUE	hsa00250	C00049 + C00026 <=> C00036 + C00025	C00049;C00026	C00036;C00025	GOT1;GOT2
247	R00355	2.6.1.1	TRUE	hsa01100	C00049 + C00026 <=> C00036 + C00025	C00049;C00026	C00036;C00025	GOT1;GOT2
458	R00694	2.6.1.1	FALSE	hsa00360	C00079 + C00026 <=> C00166 + C00025	C00079;C00026	C00166;C00025	GOT1;GOT2
460	R00694	2.6.1.1	FALSE	hsa00400	C00079 + C00026 <=> C00166 + C00025	C00079;C00026	C00166;C00025	GOT1;GOT2
462	R00694	2.6.1.1	FALSE	hsa01100	C00079 + C00026 <=> C00166 + C00025	C00079;C00026	C00166;C00025	GOT1;GOT2
518	R00734	2.6.1.1	FALSE	hsa00350	C00082 + C00026 <=> C01179 + C00025	C00082;C00026	C01179;C00025	GOT1;GOT2
520	R00734	2.6.1.1	FALSE	hsa00400	C00082 + C00026 <=> C01179 + C00025	C00082;C00026	C01179;C00025	GOT1;GOT2
522	R00734	2.6.1.1	FALSE	hsa01100	C00082 + C00026 <=> C01179 + C00025	C00082;C00026	C01179;C00025	GOT1;GOT2
594	R00895	2.6.1.1	FALSE	hsa00270	C00097 + C00026 <=> C00957 + C00025	C00097;C00026	C00957;C00025	GOT1;GOT2
595	R00895	2.6.1.1	FALSE	hsa01100	C00097 + C00026 <=> C00957 + C00025	C00097;C00026	C00957;C00025	GOT1;GOT2
596	R00896	2.6.1.1	FALSE	hsa00270	C00097 + C00026 <=> C00957 + C00302	C00097;C00026	C00957;C00302	GOT1;GOT2
597	R00896	2.6.1.1	FALSE	hsa01100	C00097 + C00026 <=> C00957 + C00302	C00097;C00026	C00957;C00302	GOT1;GOT2
1566	R02433	2.6.1.1	FALSE	hsa00270	C00506 + C00026 <=> C05528 + C00025	C00506;C00026	C05528;C00025	GOT1;GOT2
1669	R02619	2.6.1.1	FALSE	hsa00270	C00606 + C00026 <=> C05527 + C00025	C00606;C00026	C05527;C00025	GOT1;GOT2
1670	R02619	2.6.1.1	FALSE	hsa01100	C00606 + C00026 <=> C05527 + C00025	C00606;C00026	C05527;C00025	GOT1;GOT2
2780	R05052	2.6.1.1	FALSE	hsa00330	C05947 + C00026 <=> C05946 + C00025	C05947;C00026	C05946;C00025	GOT1;GOT2
2781	R05052	2.6.1.1	FALSE	hsa01100	C05947 + C00026 <=> C05946 + C00025	C05947;C00026	C05946;C00025	GOT1;GOT2
Rid	EC	Irreversible	Pathway	Rid.1	C_in	C_out	Gene_symbol
180	R00261	4.1.1.15	TRUE	hsa00250	C00025 <=> C00334 + C00011	C00025	C00334;C00011	GAD1;GAD2
181	R00261	4.1.1.15	TRUE	hsa00650	C00025 <=> C00334 + C00011	C00025	C00334;C00011	GAD1;GAD2
182	R00261	4.1.1.15	TRUE	hsa01100	C00025 <=> C00334 + C00011	C00025	C00334;C00011	GAD1;GAD2
333	R00489	4.1.1.15	FALSE	hsa00410	C00049 <=> C00099 + C00011	C00049	C00099;C00011	GAD1;GAD2
334	R00489	4.1.1.15	FALSE	hsa01100	C00049 <=> C00099 + C00011	C00049	C00099;C00011	GAD1;GAD2
1120	R01682	4.1.1.15	FALSE	hsa00430	C00506 <=> C00245 + C00011	C00506	C00245;C00011	GAD1;GAD2
1122	R01682	4.1.1.15	FALSE	hsa01100	C00506 <=> C00245 + C00011	C00506	C00245;C00011	GAD1;GAD2
1570	R02466	4.1.1.15	FALSE	hsa00430	C00606 <=> C00519 + C00011	C00606	C00519;C00011	GAD1;GAD2
1572	R02466	4.1.1.15	FALSE	hsa01100	C00606 <=> C00519 + C00011	C00606	C00519;C00011	GAD1;GAD2
4059	R00489	4.1.1.11	TRUE	hsa00410	C00049 <=> C00099 + C00011	C00049	C00099;C00011	GADL1;ADC;CSADC;HuADC;HuCSADC
Rid	EC	Irreversible	Pathway	Rid.1	C_in	C_out	Gene_symbol
3896	R09076	1.5.3.16	TRUE	hsa00330	C00750 + C00007 + C00001 <=> C00315 + C05665 + C00027	C00750;C00007;C00001	C00315;C05665;C00027	SMOX
3897	R09076	1.5.3.16	TRUE	hsa00410	C00750 + C00007 + C00001 <=> C00315 + C05665 + C00027	C00750;C00007;C00001	C00315;C05665;C00027	SMOX
1233	R01853	1.4.3.21	TRUE		C00375 + C00001 + C00007 <=> C00071 + C00014 + C00027	C00375;C00001;C00007	C00071;C00014;C00027	AOC2;AOC3
1553	R02382	1.4.3.21	FALSE	hsa00350	C00483 + C00001 + C00007 <=> C03765 + C00014 + C00027	C00483;C00001;C00007	C03765;C00014;C00027	AOC2;AOC3
1610	R02529	1.4.3.21	FALSE	hsa00260	C01888 + C00001 + C00007 <=> C00546 + C00014 + C00027	C01888;C00001;C00007	C00546;C00014;C00027	AOC2;AOC3
1667	R02613	1.4.3.21	FALSE	hsa00360	C05332 + C00007 + C00001 <=> C00601 + C00014 + C00027	C05332;C00007;C00001	C00601;C00014;C00027	AOC2;AOC3
1892	R03139	1.4.3.21	FALSE	hsa00410	C00986 + C00007 + C00001 <=> C05665 + C00014 + C00027	C00986;C00007;C00001	C05665;C00014;C00027	AOC2;AOC3
2247	R04027	1.4.3.21	FALSE	hsa01100	C02723 + C00007 + C00080 <=> C06178 + C00027 + C00014	C02723;C00007;C00080	C06178;C00027;C00014	AOC2;AOC3
2339	R04300	1.4.3.21	FALSE	hsa00350	C03758 + C00001 + C00007 <=> C04043 + C00014 + C00027	C03758;C00001;C00007	C04043;C00014;C00027	AOC2;AOC3
2341	R04300	1.4.3.21	FALSE	hsa01100	C03758 + C00001 + C00007 <=> C04043 + C00014 + C00027	C03758;C00001;C00007	C04043;C00014;C00027	AOC2;AOC3
2831	R05334	1.4.3.21	FALSE		C02723 + C00007 + C00001 <=> C10974 + C00027 + C00014	C02723;C00007;C00001	C10974;C00027;C00014	AOC2;AOC3
3145	R06154	1.4.3.21	FALSE		C00218 + C00007 + C00001 <=> C00067 + C00014 + C00027	C00218;C00007;C00001	C00067;C00014;C00027	AOC2;AOC3
3239	R06740	1.4.3.21	FALSE	hsa01100	C01672 + C00001 + C00007 <=> C12455 + C00014 + C00027	C01672;C00001;C00007	C12455;C00014;C00027	AOC2;AOC3
183	R00264	1.2.1.3	FALSE	hsa00040	C00433 + C00006 + C00001 <=> C00026 + C00005 + C00080	C00433;C00006;C00001	C00026;C00005;C00080	ALDH2;ALDH1B1;ALDH3A2
184	R00264	1.2.1.3	FALSE	hsa00053	C00433 + C00006 + C00001 <=> C00026 + C00005 + C00080	C00433;C00006;C00001	C00026;C00005;C00080	ALDH2;ALDH1B1;ALDH9A1;ALDH3A2;ALDH7A1
362	R00538	1.2.1.3	TRUE		C00071 + C00003 + C00001 <=> C00060 + C00004 + C00080	C00071;C00003;C00001	C00060;C00004;C00080	ALDH2;ALDH1B1;ALDH9A1;ALDH3A2;ALDH7A1
429	R00631	1.2.1.3	FALSE	hsa00071	C00071 + C00003 + C00001 <=> C00162 + C00004 + C00080	C00071;C00003;C00001	C00162;C00004;C00080	ALDH2;ALDH1B1;ALDH9A1;ALDH3A2;ALDH7A1
489	R00710	1.2.1.3	FALSE	hsa00010	C00084 + C00003 + C00001 <=> C00033 + C00004 + C00080	C00084;C00003;C00001	C00033;C00004;C00080	ALDH2;ALDH1B1;ALDH9A1;ALDH3A2;ALDH7A1
491	R00710	1.2.1.3	FALSE	hsa00620	C00084 + C00003 + C00001 <=> C00033 + C00004 + C00080	C00084;C00003;C00001	C00033;C00004;C00080	ALDH2;ALDH1B1;ALDH9A1;ALDH3A2;ALDH7A1
492	R00710	1.2.1.3	FALSE	hsa01100	C00084 + C00003 + C00001 <=> C00033 + C00004 + C00080	C00084;C00003;C00001	C00033;C00004;C00080	ALDH2;ALDH1B1;ALDH9A1;ALDH3A2;ALDH7A1
602	R00904	1.2.1.3	FALSE	hsa00410	C05665 + C00003 + C00001 <=> C00099 + C00004 + C00080	C05665;C00003;C00001	C00099;C00004;C00080	ALDH2;ALDH1B1;ALDH9A1;ALDH3A2;ALDH7A1
1145	R01752	1.2.1.3	FALSE	hsa00561	C00577 + C00003 + C00001 <=> C00258 + C00004 + C00080	C00577;C00003;C00001	C00258;C00004;C00080	ALDH2;ALDH1B1;ALDH9A1;ALDH3A2;ALDH7A1
1322	R01986	1.2.1.3	FALSE	hsa00330	C00555 + C00006 + C00001 <=> C00334 + C00005 + C00080	C00555;C00006;C00001	C00334;C00005;C00080	ALDH2;ALDH1B1;ALDH9A1;ALDH3A2;ALDH7A1
1628	R02549	1.2.1.3	FALSE	hsa00330	C00555 + C00003 + C00001 <=> C00334 + C00004 + C00080	C00555;C00003;C00001	C00334;C00004;C00080	ALDH2;ALDH1B1;ALDH9A1;ALDH3A2;ALDH7A1
1629	R02549	1.2.1.3	FALSE	hsa00410	C00555 + C00003 + C00001 <=> C00334 + C00004 + C00080	C00555;C00003;C00001	C00334;C00004;C00080	ALDH2;ALDH1B1;ALDH9A1;ALDH3A2;ALDH7A1
1696	R02678	1.2.1.3	FALSE	hsa00380	C00637 + C00003 + C00001 <=> C00954 + C00004 + C00080	C00637;C00003;C00001	C00954;C00004;C00080	ALDH2;ALDH1B1;ALDH9A1;ALDH3A2;ALDH7A1
1697	R02678	1.2.1.3	FALSE	hsa01100	C00637 + C00003 + C00001 <=> C00954 + C00004 + C00080	C00637;C00003;C00001	C00954;C00004;C00080	ALDH2;ALDH1B1;ALDH9A1;ALDH3A2;ALDH7A1
1827	R02940	1.2.1.3	FALSE	hsa00640	C05985 + C00003 + C00001 <=> C00804 + C00004 + C00080	C05985;C00003;C00001	C00804;C00004;C00080	ALDH2;ALDH1B1;ALDH9A1;ALDH3A2;ALDH7A1
1829	R02957	1.2.1.3	FALSE	hsa00053	C02670 + C00003 + 2 C00001 <=> C00818 + C00004 + C00080	C02670;C00003;C00001	C00818;C00004;C00080	ALDH2;ALDH1B1;ALDH9A1;ALDH3A2;ALDH7A1
1830	R02957	1.2.1.3	FALSE	hsa01100	C02670 + C00003 + 2 C00001 <=> C00818 + C00004 + C00080	C02670;C00003;C00001	C00818;C00004;C00080	ALDH2;ALDH1B1;ALDH9A1;ALDH3A2;ALDH7A1
1957	R03283	1.2.1.3	FALSE	hsa00310	C01149 + C00003 + C00001 <=> C01181 + C00004 + C00080	C01149;C00003;C00001	C01181;C00004;C00080	ALDH2;ALDH1B1;ALDH9A1;ALDH3A2;ALDH7A1
2190	R03869	1.2.1.3	FALSE	hsa00280	C06002 + C00003 + C00001 <=> C02170 + C00004 + C00080	C06002;C00003;C00001	C02170;C00004;C00080	ALDH2;ALDH1B1;ALDH9A1;ALDH3A2;ALDH7A1
2252	R04065	1.2.1.3	FALSE	hsa00340	C05130 + C00003 + C00001 <=> C02835 + C00004 + C00080	C05130;C00003;C00001	C02835;C00004;C00080	ALDH2;ALDH1B1;ALDH9A1;ALDH3A2;ALDH7A1
2421	R04506	1.2.1.3	FALSE		C05445 + C00003 + C00001 <=> C04554 + C00004 + C00080	C05445;C00003;C00001	C04554;C00004;C00080	ALDH2;ALDH1B1;ALDH9A1;ALDH3A2;ALDH7A1
2702	R04903	1.2.1.3	FALSE	hsa00380	C05634 + C00003 + C00001 <=> C05635 + C00080 + C00004	C05634;C00003;C00001	C05635;C00080;C00004	ALDH2;ALDH1B1;ALDH9A1;ALDH3A2;ALDH7A1
2703	R04903	1.2.1.3	FALSE	hsa01100	C05634 + C00003 + C00001 <=> C05635 + C00080 + C00004	C05634;C00003;C00001	C05635;C00080;C00004	ALDH2;ALDH1B1;ALDH9A1;ALDH3A2;ALDH7A1
2777	R05050	1.2.1.3	FALSE	hsa00330	C05936 + C00003 + C00001 <=> C02946 + C00004 + C00080	C05936;C00003;C00001	C02946;C00004;C00080	ALDH2;ALDH1B1;ALDH9A1;ALDH3A2;ALDH7A1
2778	R05050	1.2.1.3	FALSE	hsa01100	C05936 + C00003 + C00001 <=> C02946 + C00004 + C00080	C05936;C00003;C00001	C02946;C00004;C00080	ALDH2;ALDH1B1;ALDH9A1;ALDH3A2;ALDH7A1
2824	R05237	1.2.1.3	FALSE	hsa01100	C06613 + C00001 <=> C06614 + 2 C00080	C06613;C00001	C06614;C00080	ALDH2;ALDH1B1;ALDH9A1;ALDH3A2;ALDH7A1
2825	R05238	1.2.1.3	FALSE	hsa01100	C16348 + C00001 <=> C06615 + 2 C00080	C16348;C00001	C06615;C00080	ALDH2;ALDH1B1;ALDH9A1;ALDH3A2;ALDH7A1
2828	R05286	1.2.1.3	FALSE	hsa01100	C06754 + C00003 + C00001 <=> C06755 + C00004 + C00080	C06754;C00003;C00001	C06755;C00004;C00080	ALDH2;ALDH1B1;ALDH9A1;ALDH3A2;ALDH7A1
363	R00538	1.2.1.5	TRUE		C00071 + C00003 + C00001 <=> C00060 + C00004 + C00080	C00071;C00003;C00001	C00060;C00004;C00080	ALDH3A1;ALDH1A3;ALDH3B1;ALDH3B2
430	R00634	1.2.1.5	TRUE		C00071 + C00006 + C00001 <=> C00060 + C00005 + C00080	C00071;C00006;C00001	C00060;C00005;C00080	ALDH3A1;ALDH1A3;ALDH3B1;ALDH3B2
490	R00710	1.2.1.5	FALSE	hsa00010	C00084 + C00003 + C00001 <=> C00033 + C00004 + C00080	C00084;C00003;C00001	C00033;C00004;C00080	ALDH3A1;ALDH1A3;ALDH3B1;ALDH3B2
493	R00710	1.2.1.5	FALSE	hsa01100	C00084 + C00003 + C00001 <=> C00033 + C00004 + C00080	C00084;C00003;C00001	C00033;C00004;C00080	ALDH3A1;ALDH1A3;ALDH3B1;ALDH3B2
494	R00711	1.2.1.5	FALSE	hsa00010	C00084 + C00006 + C00001 <=> C00033 + C00005 + C00080	C00084;C00006;C00001	C00033;C00005;C00080	ALDH3A1;ALDH1A3;ALDH3B1;ALDH3B2
495	R00711	1.2.1.5	FALSE	hsa01100	C00084 + C00006 + C00001 <=> C00033 + C00005 + C00080	C00084;C00006;C00001	C00033;C00005;C00080	ALDH3A1;ALDH1A3;ALDH3B1;ALDH3B2
603	R00904	1.2.1.5	FALSE	hsa00410	C05665 + C00003 + C00001 <=> C00099 + C00004 + C00080	C05665;C00003;C00001	C00099;C00004;C00080	ALDH3A1;ALDH1A3;ALDH3B1;ALDH3B2
1621	R02536	1.2.1.5	FALSE	hsa00360	C00601 + C00003 + C00001 <=> C07086 + C00004 + C00080	C00601;C00003;C00001	C07086;C00004;C00080	ALDH3A1;ALDH1A3;ALDH3B1;ALDH3B2
1622	R02536	1.2.1.5	FALSE	hsa01100	C00601 + C00003 + C00001 <=> C07086 + C00004 + C00080	C00601;C00003;C00001	C07086;C00004;C00080	ALDH3A1;ALDH1A3;ALDH3B1;ALDH3B2
1623	R02537	1.2.1.5	FALSE	hsa00360	C00601 + C00006 + C00001 <=> C07086 + C00005 + C00080	C00601;C00006;C00001	C07086;C00005;C00080	ALDH3A1;ALDH1A3;ALDH3B1;ALDH3B2
1624	R02537	1.2.1.5	FALSE	hsa01100	C00601 + C00006 + C00001 <=> C07086 + C00005 + C00080	C00601;C00006;C00001	C07086;C00005;C00080	ALDH3A1;ALDH1A3;ALDH3B1;ALDH3B2
1705	R02695	1.2.1.5	FALSE	hsa00350	C03765 + C00003 + C00001 <=> C00642 + C00004 + C00080	C03765;C00003;C00001	C00642;C00004;C00080	ALDH3A1;ALDH1A3;ALDH3B1;ALDH3B2
1706	R02697	1.2.1.5	FALSE	hsa00350	C03765 + C00006 + C00001 <=> C00642 + C00005 + C00080	C03765;C00006;C00001	C00642;C00005;C00080	ALDH3A1;ALDH1A3;ALDH3B1;ALDH3B2
1970	R03300	1.2.1.5	FALSE	hsa00350	C04043 + C00003 + C00001 <=> C01161 + C00004 + C00080	C04043;C00003;C00001	C01161;C00004;C00080	ALDH3A1;ALDH1A3;ALDH3B1;ALDH3B2
1971	R03300	1.2.1.5	FALSE	hsa01100	C04043 + C00003 + C00001 <=> C01161 + C00004 + C00080	C04043;C00003;C00001	C01161;C00004;C00080	ALDH3A1;ALDH1A3;ALDH3B1;ALDH3B2
1972	R03302	1.2.1.5	FALSE	hsa00350	C04043 + C00006 + C00001 <=> C01161 + C00005 + C00080	C04043;C00006;C00001	C01161;C00005;C00080	ALDH3A1;ALDH1A3;ALDH3B1;ALDH3B2
1973	R03302	1.2.1.5	FALSE	hsa01100	C04043 + C00006 + C00001 <=> C01161 + C00005 + C00080	C04043;C00006;C00001	C01161;C00005;C00080	ALDH3A1;ALDH1A3;ALDH3B1;ALDH3B2
2680	R04882	1.2.1.5	FALSE	hsa00350	C05577 + C00003 + C00001 <=> C05580 + C00004 + C00080	C05577;C00003;C00001	C05580;C00004;C00080	ALDH3A1;ALDH1A3;ALDH3B1;ALDH3B2
2681	R04882	1.2.1.5	FALSE	hsa01100	C05577 + C00003 + C00001 <=> C05580 + C00004 + C00080	C05577;C00003;C00001	C05580;C00004;C00080	ALDH3A1;ALDH1A3;ALDH3B1;ALDH3B2
2682	R04883	1.2.1.5	FALSE	hsa00350	C05577 + C00006 + C00001 <=> C05580 + C00005 + C00080	C05577;C00006;C00001	C05580;C00005;C00080	ALDH3A1;ALDH1A3;ALDH3B1;ALDH3B2
2683	R04883	1.2.1.5	FALSE	hsa01100	C05577 + C00006 + C00001 <=> C05580 + C00005 + C00080	C05577;C00006;C00001	C05580;C00005;C00080	ALDH3A1;ALDH1A3;ALDH3B1;ALDH3B2
2688	R04888	1.2.1.5	FALSE	hsa00350	C05581 + C00003 + C00001 <=> C05582 + C00004 + C00080	C05581;C00003;C00001	C05582;C00004;C00080	ALDH3A1;ALDH1A3;ALDH3B1;ALDH3B2
2689	R04888	1.2.1.5	FALSE	hsa01100	C05581 + C00003 + C00001 <=> C05582 + C00004 + C00080	C05581;C00003;C00001	C05582;C00004;C00080	ALDH3A1;ALDH1A3;ALDH3B1;ALDH3B2
2690	R04889	1.2.1.5	FALSE	hsa00350	C05581 + C00006 + C00001 <=> C05582 + C00005 + C00080	C05581;C00006;C00001	C05582;C00005;C00080	ALDH3A1;ALDH1A3;ALDH3B1;ALDH3B2
2691	R04889	1.2.1.5	FALSE	hsa01100	C05581 + C00006 + C00001 <=> C05582 + C00005 + C00080	C05581;C00006;C00001	C05582;C00005;C00080	ALDH3A1;ALDH1A3;ALDH3B1;ALDH3B2
2694	R04891	1.2.1.5	FALSE	hsa00350	C05583 + C00003 + C00001 <=> C05584 + C00004 + C00080	C05583;C00003;C00001	C05584;C00004;C00080	ALDH3A1;ALDH1A3;ALDH3B1;ALDH3B2
2695	R04891	1.2.1.5	FALSE	hsa01100	C05583 + C00003 + C00001 <=> C05584 + C00004 + C00080	C05583;C00003;C00001	C05584;C00004;C00080	ALDH3A1;ALDH1A3;ALDH3B1;ALDH3B2
2696	R04892	1.2.1.5	FALSE	hsa00350	C05583 + C00006 + C00001 <=> C05584 + C00005 + C00080	C05583;C00006;C00001	C05584;C00005;C00080	ALDH3A1;ALDH1A3;ALDH3B1;ALDH3B2
2697	R04892	1.2.1.5	FALSE	hsa01100	C05583 + C00006 + C00001 <=> C05584 + C00005 + C00080	C05583;C00006;C00001	C05584;C00005;C00080	ALDH3A1;ALDH1A3;ALDH3B1;ALDH3B2
2769	R04996	1.2.1.5	FALSE	hsa00340	C05827 + C00003 + C00001 <=> C05828 + C00004 + C00080	C05827;C00003;C00001	C05828;C00004;C00080	ALDH3A1;ALDH1A3;ALDH3B1;ALDH3B2
3361	R07104	1.2.1.5	FALSE	hsa00980	C06899 + C00003 <=> C11150 + C00004 + C00080	C06899;C00003	C11150;C00004;C00080	ALDH3A1;ALDH1A3;ALDH3B1;ALDH3B2
3725	R08282	1.2.1.5	FALSE	hsa00982	C07645 + C00003 + C00001 <=> C07646 + C00004 + C00080	C07645;C00003;C00001	C07646;C00004;C00080	ALDH3A1;ALDH1A3;ALDH3B1;ALDH3B2
3726	R08283	1.2.1.5	FALSE	hsa00982	C07645 + C00006 + C00001 <=> C07646 + C00005 + C00080	C07645;C00006;C00001	C07646;C00005;C00080	ALDH3A1;ALDH1A3;ALDH3B1;ALDH3B2
3739	R08307	1.2.1.5	FALSE	hsa00982	C16587 + C00003 + C00001 <=> C16591 + C00004 + C00080	C16587;C00003;C00001	C16591;C00004;C00080	ALDH3A1;ALDH1A3;ALDH3B1;ALDH3B2
Rid	EC	Irreversible	Pathway	Rid.1	C_in	C_out	Gene_symbol
814	R01166	3.4.13.18	NA	hsa00340	C00386 + C00001 <=> C00099 + C00135	C00386;C00001	C00099;C00135	CNDP2
816	R01166	3.4.13.18	NA	hsa00410	C00386 + C00001 <=> C00099 + C00135	C00386;C00001	C00099;C00135	CNDP2
818	R01166	3.4.13.18	NA	hsa01100	C00386 + C00001 <=> C00099 + C00135	C00386;C00001	C00099;C00135	CNDP2
1326	R01992	3.4.13.18	NA	hsa00330	C00884 + C00001 <=> C00334 + C00135	C00884;C00001	C00334;C00135	CNDP2
815	R01166	3.4.13.20	TRUE	hsa00340	C00386 + C00001 <=> C00099 + C00135	C00386;C00001	C00099;C00135	CNDP1
817	R01166	3.4.13.20	TRUE	hsa00410	C00386 + C00001 <=> C00099 + C00135	C00386;C00001	C00099;C00135	CNDP1
819	R01166	3.4.13.20	TRUE	hsa01100	C00386 + C00001 <=> C00099 + C00135	C00386;C00001	C00099;C00135	CNDP1
1327	R01992	3.4.13.20	NA	hsa00330	C00884 + C00001 <=> C00334 + C00135	C00884;C00001	C00334;C00135	CNDP1
1961	R03288	3.4.13.20	TRUE	hsa00340	C01262 + C00001 <=> C00099 + C01152	C01262;C00001	C00099;C01152	CNDP1
1962	R03288	3.4.13.20	TRUE	hsa00410	C01262 + C00001 <=> C00099 + C01152	C01262;C00001	C00099;C01152	CNDP1
1963	R03288	3.4.13.20	TRUE	hsa01100	C01262 + C00001 <=> C00099 + C01152	C01262;C00001	C00099;C01152	CNDP1
611	R00910	6.3.2.11	FALSE	hsa00410	C00002 + C00047 + C00099 <=> C00008 + C00009 + C05341	C00002;C00047;C00099	C00008;C00009;C05341	CARNS1
612	R00912	6.3.2.11	FALSE	hsa00410	C00002 + C00062 + C00099 <=> C00008 + C00009 + C05340	C00002;C00062;C00099	C00008;C00009;C05340	CARNS1
812	R01164	6.3.2.11	TRUE	hsa00340	C00002 + C00135 + C00099 <=> C00008 + C00009 + C00386	C00002;C00135;C00099	C00008;C00009;C00386	CARNS1
813	R01164	6.3.2.11	TRUE	hsa00410	C00002 + C00135 + C00099 <=> C00008 + C00009 + C00386	C00002;C00135;C00099	C00008;C00009;C00386	CARNS1
1325	R01991	6.3.2.11	FALSE	hsa00330	C00002 + C00135 + C00334 <=> C00008 + C00009 + C00884	C00002;C00135;C00334	C00008;C00009;C00884	CARNS1
1959	R03286	6.3.2.11	FALSE	hsa00340	C00002 + C01152 + C00099 <=> C00008 + C00009 + C01262	C00002;C01152;C00099	C00008;C00009;C01262	CARNS1
1960	R03286	6.3.2.11	FALSE	hsa00410	C00002 + C01152 + C00099 <=> C00008 + C00009 + C01262	C00002;C01152;C00099	C00008;C00009;C01262	CARNS1
Rid	EC	Irreversible	Pathway	Rid.1	C_in	C_out	Gene_symbol
608	R00908	2.6.1.19	FALSE	hsa00410	C00099 + C00026 <=> C00222 + C00025	C00099;C00026	C00222;C00025	ABAT
609	R00908	2.6.1.19	FALSE	hsa00640	C00099 + C00026 <=> C00222 + C00025	C00099;C00026	C00222;C00025	ABAT
610	R00908	2.6.1.19	FALSE	hsa01100	C00099 + C00026 <=> C00222 + C00025	C00099;C00026	C00222;C00025	ABAT
1094	R01648	2.6.1.19	TRUE	hsa00250	C00334 + C00026 <=> C00232 + C00025	C00334;C00026	C00232;C00025	ABAT
1095	R01648	2.6.1.19	TRUE	hsa00650	C00334 + C00026 <=> C00232 + C00025	C00334;C00026	C00232;C00025	ABAT
1096	R01648	2.6.1.19	TRUE	hsa01100	C00334 + C00026 <=> C00232 + C00025	C00334;C00026	C00232;C00025	ABAT
471	R00705	1.2.1.18	TRUE	hsa00410	C00222 + C00010 + C00003 <=> C00024 + C00011 + C00004 + C00080	C00222;C00010;C00003	C00024;C00011;C00004;C00080	ALDH6A1
472	R00705	1.2.1.18	TRUE	hsa00562	C00222 + C00010 + C00003 <=> C00024 + C00011 + C00004 + C00080	C00222;C00010;C00003	C00024;C00011;C00004;C00080	ALDH6A1
473	R00705	1.2.1.18	TRUE	hsa00640	C00222 + C00010 + C00003 <=> C00024 + C00011 + C00004 + C00080	C00222;C00010;C00003	C00024;C00011;C00004;C00080	ALDH6A1
475	R00705	1.2.1.18	TRUE	hsa01100	C00222 + C00010 + C00003 <=> C00024 + C00011 + C00004 + C00080	C00222;C00010;C00003	C00024;C00011;C00004;C00080	ALDH6A1
477	R00706	1.2.1.18	TRUE	hsa00410	C00222 + C00010 + C00006 <=> C00024 + C00011 + C00005 + C00080	C00222;C00010;C00006	C00024;C00011;C00005;C00080	ALDH6A1
478	R00706	1.2.1.18	TRUE	hsa00562	C00222 + C00010 + C00006 <=> C00024 + C00011 + C00005 + C00080	C00222;C00010;C00006	C00024;C00011;C00005;C00080	ALDH6A1
479	R00706	1.2.1.18	TRUE	hsa00640	C00222 + C00010 + C00006 <=> C00024 + C00011 + C00005 + C00080	C00222;C00010;C00006	C00024;C00011;C00005;C00080	ALDH6A1
480	R00706	1.2.1.18	TRUE	hsa01100	C00222 + C00010 + C00006 <=> C00024 + C00011 + C00005 + C00080	C00222;C00010;C00006	C00024;C00011;C00005;C00080	ALDH6A1
2020	R03381	1.2.1.18	FALSE	hsa00640	C06002 + C00010 + C00003 <=> C01213 + C00004 + C00080	C06002;C00010;C00003	C01213;C00004;C00080	ALDH6A1
Rid	EC	Irreversible	Pathway	Rid.1	C_in	C_out	Gene_symbol
604	R00905	3.5.1.6	TRUE	hsa00240	C02642 + C00001 <=> C00099 + C00011 + C00014	C02642;C00001	C00099;C00011;C00014	UPB1
605	R00905	3.5.1.6	TRUE	hsa00410	C02642 + C00001 <=> C00099 + C00011 + C00014	C02642;C00001	C00099;C00011;C00014	UPB1
606	R00905	3.5.1.6	TRUE	hsa00770	C02642 + C00001 <=> C00099 + C00011 + C00014	C02642;C00001	C00099;C00011;C00014	UPB1
607	R00905	3.5.1.6	TRUE	hsa01100	C02642 + C00001 <=> C00099 + C00011 + C00014	C02642;C00001	C00099;C00011;C00014	UPB1
2493	R04666	3.5.1.6	FALSE	hsa00240	C05100 + C00001 <=> C05145 + C00011 + C00014	C05100;C00001	C05145;C00011;C00014	UPB1
2494	R04666	3.5.1.6	FALSE	hsa01100	C05100 + C00001 <=> C05145 + C00011 + C00014	C05100;C00001	C05145;C00011;C00014	UPB1
3682	R08228	3.5.1.6	FALSE	hsa00983	C16631 + C00001 <=> C16632 + C00011 + C00014	C16631;C00001	C16632;C00011;C00014	UPB1
1492	R02269	3.5.2.2	TRUE	hsa00240	C00429 + C00001 <=> C02642	C00429;C00001	C02642	DPYS
1493	R02269	3.5.2.2	TRUE	hsa00410	C00429 + C00001 <=> C02642	C00429;C00001	C02642	DPYS
1494	R02269	3.5.2.2	TRUE	hsa00770	C00429 + C00001 <=> C02642	C00429;C00001	C02642	DPYS
1495	R02269	3.5.2.2	TRUE	hsa01100	C00429 + C00001 <=> C02642	C00429;C00001	C02642	DPYS
1864	R03055	3.5.2.2	FALSE	hsa00240	C00906 + C00001 <=> C05100	C00906;C00001	C05100	DPYS
1865	R03055	3.5.2.2	FALSE	hsa01100	C00906 + C00001 <=> C05100	C00906;C00001	C05100	DPYS
3681	R08227	3.5.2.2	FALSE	hsa00983	C16630 + C00001 <=> C16631	C16630;C00001	C16631	DPYS
679	R00978	1.3.1.2	TRUE	hsa00240	C00429 + C00006 <=> C00106 + C00005 + C00080	C00429;C00006	C00106;C00005;C00080	DPYD
680	R00978	1.3.1.2	TRUE	hsa00410	C00429 + C00006 <=> C00106 + C00005 + C00080	C00429;C00006	C00106;C00005;C00080	DPYD
681	R00978	1.3.1.2	TRUE	hsa00770	C00429 + C00006 <=> C00106 + C00005 + C00080	C00429;C00006	C00106;C00005;C00080	DPYD
682	R00978	1.3.1.2	TRUE	hsa01100	C00429 + C00006 <=> C00106 + C00005 + C00080	C00429;C00006	C00106;C00005;C00080	DPYD
994	R01415	1.3.1.2	FALSE	hsa00240	C00906 + C00006 <=> C00178 + C00005 + C00080	C00906;C00006	C00178;C00005;C00080	DPYD
995	R01415	1.3.1.2	FALSE	hsa01100	C00906 + C00006 <=> C00178 + C00005 + C00080	C00906;C00006	C00178;C00005;C00080	DPYD
3680	R08226	1.3.1.2	FALSE	hsa00983	C07649 + C00005 + C00080 <=> C16630 + C00006	C07649;C00005;C00080	C16630;C00006	DPYD
1249	R01876	2.4.2.3	TRUE	hsa00240	C00299 + C00009 <=> C00106 + C00620	C00299;C00009	C00106;C00620	UPP2;UPP1
1250	R01876	2.4.2.3	TRUE	hsa01100	C00299 + C00009 <=> C00106 + C00620	C00299;C00009	C00106;C00620	UPP2;UPP1
1583	R02484	2.4.2.3	NA	hsa00240	C00526 + C00009 <=> C00106 + C00672	C00526;C00009	C00106;C00672	UPP2;UPP1
3683	R08229	2.4.2.3	FALSE	hsa00983	C07649 + C00620 <=> C16633 + C00009	C07649;C00620	C16633;C00009	UPP2;UPP1
350	R00513	2.7.1.48	FALSE	hsa00240	C00002 + C00475 <=> C00008 + C00055	C00002;C00475	C00008;C00055	UCKL1;UCK2;UCK1
351	R00513	2.7.1.48	FALSE	hsa01100	C00002 + C00475 <=> C00008 + C00055	C00002;C00475	C00008;C00055	UCKL1;UCK2;UCK1
353	R00516	2.7.1.48	FALSE	hsa00240	C00075 + C00475 <=> C00015 + C00055	C00075;C00475	C00015;C00055	UCKL1;UCK2;UCK1
354	R00516	2.7.1.48	FALSE	hsa01100	C00075 + C00475 <=> C00015 + C00055	C00075;C00475	C00015;C00055	UCKL1;UCK2;UCK1
355	R00517	2.7.1.48	FALSE	hsa00240	C00044 + C00475 <=> C00035 + C00055	C00044;C00475	C00035;C00055	UCKL1;UCK2;UCK1
356	R00517	2.7.1.48	FALSE	hsa01100	C00044 + C00475 <=> C00035 + C00055	C00044;C00475	C00035;C00055	UCKL1;UCK2;UCK1
663	R00962	2.7.1.48	FALSE	hsa00240	C00081 + C00475 <=> C00104 + C00055	C00081;C00475	C00104;C00055	UCKL1;UCK2;UCK1
664	R00962	2.7.1.48	FALSE	hsa01100	C00081 + C00475 <=> C00104 + C00055	C00081;C00475	C00104;C00055	UCKL1;UCK2;UCK1
666	R00964	2.7.1.48	TRUE	hsa00240	C00002 + C00299 <=> C00008 + C00105	C00002;C00299	C00008;C00105	UCKL1;UCK2;UCK1
667	R00964	2.7.1.48	TRUE	hsa01100	C00002 + C00299 <=> C00008 + C00105	C00002;C00299	C00008;C00105	UCKL1;UCK2;UCK1
672	R00967	2.7.1.48	FALSE	hsa00240	C00075 + C00299 <=> C00015 + C00105	C00075;C00299	C00015;C00105	UCKL1;UCK2;UCK1
673	R00967	2.7.1.48	FALSE	hsa01100	C00075 + C00299 <=> C00015 + C00105	C00075;C00299	C00015;C00105	UCKL1;UCK2;UCK1
674	R00968	2.7.1.48	FALSE	hsa00240	C00044 + C00299 <=> C00035 + C00105	C00044;C00299	C00035;C00105	UCKL1;UCK2;UCK1
675	R00968	2.7.1.48	FALSE	hsa01100	C00044 + C00299 <=> C00035 + C00105	C00044;C00299	C00035;C00105	UCKL1;UCK2;UCK1
677	R00970	2.7.1.48	FALSE	hsa00240	C00081 + C00299 <=> C00104 + C00105	C00081;C00299	C00104;C00105	UCKL1;UCK2;UCK1
678	R00970	2.7.1.48	FALSE	hsa01100	C00081 + C00299 <=> C00104 + C00105	C00081;C00299	C00104;C00105	UCKL1;UCK2;UCK1
1053	R01548	2.7.1.48	FALSE	hsa00240	C00131 + C00475 <=> C00206 + C00055	C00131;C00475	C00206;C00055	UCKL1;UCK2;UCK1
1054	R01548	2.7.1.48	FALSE	hsa01100	C00131 + C00475 <=> C00206 + C00055	C00131;C00475	C00206;C00055	UCKL1;UCK2;UCK1
1055	R01549	2.7.1.48	FALSE	hsa00240	C00131 + C00299 <=> C00206 + C00105	C00131;C00299	C00206;C00105	UCKL1;UCK2;UCK1
1056	R01549	2.7.1.48	FALSE	hsa01100	C00131 + C00299 <=> C00206 + C00105	C00131;C00299	C00206;C00105	UCKL1;UCK2;UCK1
1253	R01880	2.7.1.48	FALSE	hsa00240	C00286 + C00299 <=> C00361 + C00105	C00286;C00299	C00361;C00105	UCKL1;UCK2;UCK1
1254	R01880	2.7.1.48	FALSE	hsa01100	C00286 + C00299 <=> C00361 + C00105	C00286;C00299	C00361;C00105	UCKL1;UCK2;UCK1
1374	R02091	2.7.1.48	FALSE	hsa00240	C00286 + C00475 <=> C00361 + C00055	C00286;C00475	C00361;C00055	UCKL1;UCK2;UCK1
1375	R02091	2.7.1.48	FALSE	hsa01100	C00286 + C00475 <=> C00361 + C00055	C00286;C00475	C00361;C00055	UCKL1;UCK2;UCK1
1382	R02096	2.7.1.48	FALSE	hsa00240	C00459 + C00475 <=> C00363 + C00055	C00459;C00475	C00363;C00055	UCKL1;UCK2;UCK1
1383	R02096	2.7.1.48	FALSE	hsa01100	C00459 + C00475 <=> C00363 + C00055	C00459;C00475	C00363;C00055	UCKL1;UCK2;UCK1
1384	R02097	2.7.1.48	FALSE	hsa00240	C00459 + C00299 <=> C00363 + C00105	C00459;C00299	C00363;C00105	UCKL1;UCK2;UCK1
1385	R02097	2.7.1.48	FALSE	hsa01100	C00459 + C00299 <=> C00363 + C00105	C00459;C00299	C00363;C00105	UCKL1;UCK2;UCK1
1522	R02327	2.7.1.48	FALSE	hsa00240	C00458 + C00299 <=> C00705 + C00105	C00458;C00299	C00705;C00105	UCKL1;UCK2;UCK1
1523	R02327	2.7.1.48	FALSE	hsa01100	C00458 + C00299 <=> C00705 + C00105	C00458;C00299	C00705;C00105	UCKL1;UCK2;UCK1
1526	R02332	2.7.1.48	FALSE	hsa00240	C00460 + C00299 <=> C01346 + C00105	C00460;C00299	C01346;C00105	UCKL1;UCK2;UCK1
1527	R02332	2.7.1.48	FALSE	hsa01100	C00460 + C00299 <=> C01346 + C00105	C00460;C00299	C01346;C00105	UCKL1;UCK2;UCK1
1548	R02371	2.7.1.48	FALSE	hsa00240	C00458 + C00475 <=> C00705 + C00055	C00458;C00475	C00705;C00055	UCKL1;UCK2;UCK1
1549	R02371	2.7.1.48	FALSE	hsa01100	C00458 + C00475 <=> C00705 + C00055	C00458;C00475	C00705;C00055	UCKL1;UCK2;UCK1
1550	R02372	2.7.1.48	FALSE	hsa00240	C00460 + C00475 <=> C01346 + C00055	C00460;C00475	C01346;C00055	UCKL1;UCK2;UCK1
1551	R02372	2.7.1.48	FALSE	hsa01100	C00460 + C00475 <=> C01346 + C00055	C00460;C00475	C01346;C00055	UCKL1;UCK2;UCK1
3686	R08232	2.7.1.48	FALSE	hsa00983	C16633 + C00002 <=> C16634 + C00008	C16633;C00002	C16634;C00008	UCKL1;UCK2;UCK1
96	R00183	3.1.3.5	FALSE	hsa00230	C00020 + C00001 <=> C00212 + C00009	C00020;C00001	C00212;C00009	NT5C1B-RDH14;NT5C3B;NT5C2;NT5C;NT5E;NT5C3A;NT5M;NT5C1A;NT5C1B
97	R00183	3.1.3.5	FALSE	hsa01100	C00020 + C00001 <=> C00212 + C00009	C00020;C00001	C00212;C00009	NT5C1B-RDH14;NT5C3B;NT5C2;NT5C;NT5E;NT5C3A;NT5M;NT5C1A;NT5C1B
347	R00511	3.1.3.5	FALSE	hsa00240	C00055 + C00001 <=> C00475 + C00009	C00055;C00001	C00475;C00009	NT5C1B-RDH14;NT5C3B;NT5C2;NT5C;NT5E;NT5C3A;NT5M;NT5C1A;NT5C1B
665	R00963	3.1.3.5	FALSE	hsa00240	C00105 + C00001 <=> C00299 + C00009	C00105;C00001	C00299;C00009	NT5C1B-RDH14;NT5C3B;NT5C2;NT5C;NT5E;NT5C3A;NT5M;NT5C1A;NT5C1B
786	R01126	3.1.3.5	FALSE	hsa00230	C00130 + C00001 <=> C00294 + C00009	C00130;C00001	C00294;C00009	NT5C1B-RDH14;NT5C3B;NT5C2;NT5C;NT5E;NT5C3A;NT5M;NT5C1A;NT5C1B
787	R01126	3.1.3.5	FALSE	hsa01100	C00130 + C00001 <=> C00294 + C00009	C00130;C00001	C00294;C00009	NT5C1B-RDH14;NT5C3B;NT5C2;NT5C;NT5E;NT5C3A;NT5M;NT5C1A;NT5C1B
865	R01227	3.1.3.5	FALSE	hsa00230	C00144 + C00001 <=> C00387 + C00009	C00144;C00001	C00387;C00009	NT5C1B-RDH14;NT5C3B;NT5C2;NT5C;NT5E;NT5C3A;NT5M;NT5C1A;NT5C1B
866	R01227	3.1.3.5	FALSE	hsa01100	C00144 + C00001 <=> C00387 + C00009	C00144;C00001	C00387;C00009	NT5C1B-RDH14;NT5C3B;NT5C2;NT5C;NT5E;NT5C3A;NT5M;NT5C1A;NT5C1B
1065	R01569	3.1.3.5	FALSE	hsa00240	C00364 + C00001 <=> C00214 + C00009	C00364;C00001	C00214;C00009	NT5C1B-RDH14;NT5C3B;NT5C2;NT5C;NT5E;NT5C3A;NT5M;NT5C1A;NT5C1B
1106	R01664	3.1.3.5	FALSE	hsa00240	C00239 + C00001 <=> C00881 + C00009	C00239;C00001	C00881;C00009	NT5C1B-RDH14;NT5C3B;NT5C2;NT5C;NT5E;NT5C3A;NT5M;NT5C1A;NT5C1B
1307	R01968	3.1.3.5	FALSE	hsa00230	C00362 + C00001 <=> C00330 + C00009	C00362;C00001	C00330;C00009	NT5C1B-RDH14;NT5C3B;NT5C2;NT5C;NT5E;NT5C3A;NT5M;NT5C1A;NT5C1B
1308	R01968	3.1.3.5	FALSE	hsa01100	C00362 + C00001 <=> C00330 + C00009	C00362;C00001	C00330;C00009	NT5C1B-RDH14;NT5C3B;NT5C2;NT5C;NT5E;NT5C3A;NT5M;NT5C1A;NT5C1B
1370	R02088	3.1.3.5	FALSE	hsa00230	C00360 + C00001 <=> C00559 + C00009	C00360;C00001	C00559;C00009	NT5C1B-RDH14;NT5C3B;NT5C2;NT5C;NT5E;NT5C3A;NT5M;NT5C1A;NT5C1B
1371	R02088	3.1.3.5	FALSE	hsa01100	C00360 + C00001 <=> C00559 + C00009	C00360;C00001	C00559;C00009	NT5C1B-RDH14;NT5C3B;NT5C2;NT5C;NT5E;NT5C3A;NT5M;NT5C1A;NT5C1B
1396	R02102	3.1.3.5	FALSE	hsa00240	C00365 + C00001 <=> C00526 + C00009	C00365;C00001	C00526;C00009	NT5C1B-RDH14;NT5C3B;NT5C2;NT5C;NT5E;NT5C3A;NT5M;NT5C1A;NT5C1B
1518	R02323	3.1.3.5	FALSE	hsa00760	C00455 + C00001 <=> C03150 + C00009	C00455;C00001	C03150;C00009	NT5C1B-RDH14;NT5C3B;NT5C2;NT5C;NT5E;NT5C3A;NT5M;NT5C1A;NT5C1B
1713	R02719	3.1.3.5	FALSE	hsa00230	C00655 + C00001 <=> C01762 + C00009	C00655;C00001	C01762;C00009	NT5C1B-RDH14;NT5C3B;NT5C2;NT5C;NT5E;NT5C3A;NT5M;NT5C1A;NT5C1B
1714	R02719	3.1.3.5	FALSE	hsa01100	C00655 + C00001 <=> C01762 + C00009	C00655;C00001	C01762;C00009	NT5C1B-RDH14;NT5C3B;NT5C2;NT5C;NT5E;NT5C3A;NT5M;NT5C1A;NT5C1B
1996	R03346	3.1.3.5	FALSE	hsa00760	C01185 + C00001 <=> C05841 + C00009	C01185;C00001	C05841;C00009	NT5C1B-RDH14;NT5C3B;NT5C2;NT5C;NT5E;NT5C3A;NT5M;NT5C1A;NT5C1B
3406	R07297	3.1.3.5	TRUE		C02520 + C00001 <=> C00911 + C00009	C02520;C00001	C00911;C00009	NT5C3L;NT5C2;NT5C;NT5E;NT5C3;NT5M;NT5C1A;NT5C1B
670	R00966	2.4.2.9	TRUE	hsa00240	C00105 + C00013 <=> C00106 + C00119	C00105;C00013	C00106;C00119	UPRT
671	R00966	2.4.2.9	TRUE	hsa01100	C00105 + C00013 <=> C00106 + C00119	C00105;C00013	C00106;C00119	UPRT
1059	R01561	2.4.2.1	FALSE	hsa00230	C00212 + C00009 <=> C00147 + C00620	C00212;C00009	C00147;C00620	PNP
1060	R01561	2.4.2.1	FALSE	hsa01100	C00212 + C00009 <=> C00147 + C00620	C00212;C00009	C00147;C00620	PNP
1243	R01863	2.4.2.1	FALSE	hsa00230	C00294 + C00009 <=> C00262 + C00620	C00294;C00009	C00262;C00620	PNP
1244	R01863	2.4.2.1	FALSE	hsa01100	C00294 + C00009 <=> C00262 + C00620	C00294;C00009	C00262;C00620	PNP
1309	R01969	2.4.2.1	FALSE	hsa00230	C00330 + C00009 <=> C00242 + C00672	C00330;C00009	C00242;C00672	PNP
1310	R01969	2.4.2.1	FALSE	hsa01100	C00330 + C00009 <=> C00242 + C00672	C00330;C00009	C00242;C00672	PNP
1422	R02147	2.4.2.1	FALSE	hsa00230	C00387 + C00009 <=> C00242 + C00620	C00387;C00009	C00242;C00620	PNP
1423	R02147	2.4.2.1	FALSE	hsa01100	C00387 + C00009 <=> C00242 + C00620	C00387;C00009	C00242;C00620	PNP
1502	R02294	2.4.2.1	FALSE	hsa00760	C03150 + C00009 <=> C00153 + C00620	C03150;C00009	C00153;C00620	PNP
1503	R02295	2.4.2.1	FALSE	hsa00760	C05841 + C00009 <=> C00253 + C00620 + C00080	C05841;C00009	C00253;C00620;C00080	PNP
1504	R02297	2.4.2.1	FALSE	hsa00230	C01762 + C00009 <=> C00385 + C00620	C01762;C00009	C00385;C00620	PNP
1505	R02297	2.4.2.1	FALSE	hsa01100	C01762 + C00009 <=> C00385 + C00620	C01762;C00009	C00385;C00620	PNP
1582	R02484	2.4.2.1	FALSE	hsa00240	C00526 + C00009 <=> C00106 + C00672	C00526;C00009	C00106;C00672	PNP
1632	R02557	2.4.2.1	FALSE	hsa00230	C00559 + C00009 <=> C00147 + C00672	C00559;C00009	C00147;C00672	PNP
1633	R02557	2.4.2.1	FALSE	hsa01100	C00559 + C00009 <=> C00147 + C00672	C00559;C00009	C00147;C00672	PNP
1738	R02748	2.4.2.1	FALSE	hsa00230	C05512 + C00009 <=> C00262 + C00672	C05512;C00009	C00262;C00672	PNP
1739	R02748	2.4.2.1	FALSE	hsa01100	C05512 + C00009 <=> C00262 + C00672	C05512;C00009	C00262;C00672	PNP
3766	R08368	2.4.2.1	TRUE		C15586 + C00009 <=> C15587 + C00620	C15586;C00009	C15587;C00620	PNP
4018	R10244	2.4.2.1	NA		C20463 + C00009 <=> C15587 + C00672	C20463;C00009	C15587;C00672	PNP
1066	R01570	2.4.2.4	TRUE	hsa00240	C00214 + C00009 <=> C00178 + C00672	C00214;C00009	C00178;C00672	TYMP
1067	R01570	2.4.2.4	TRUE	hsa01100	C00214 + C00009 <=> C00178 + C00672	C00214;C00009	C00178;C00672	TYMP
1311	R01969	2.4.2.4	FALSE	hsa01100	C00330 + C00009 <=> C00242 + C00672	C00330;C00009	C00242;C00672	TYMP
1584	R02484	2.4.2.4	FALSE	hsa00240	C00526 + C00009 <=> C00106 + C00672	C00526;C00009	C00106;C00672	TYMP
1740	R02748	2.4.2.4	FALSE	hsa01100	C05512 + C00009 <=> C00262 + C00672	C05512;C00009	C00262;C00672	TYMP
3674	R08222	2.4.2.4	FALSE	hsa00983	C12739 + C00009 <=> C07649 + C16637	C12739;C00009	C07649;C16637	TYMP
3684	R08230	2.4.2.4	FALSE	hsa00983	C07649 + C00672 <=> C11736 + C00009	C07649;C00672	C11736;C00009	TYMP
1063	R01567	2.7.1.21	TRUE	hsa00240	C00002 + C00214 <=> C00008 + C00364	C00002;C00214	C00008;C00364	TK1;TK2
1064	R01567	2.7.1.21	TRUE	hsa01100	C00002 + C00214 <=> C00008 + C00364	C00002;C00214	C00008;C00364	TK1;TK2
1388	R02099	2.7.1.21	FALSE	hsa00240	C00002 + C00526 <=> C00008 + C00365	C00002;C00526	C00008;C00365	TK1;TK2
3687	R08233	2.7.1.21	FALSE	hsa00983	C11736 + C00002 <=> C04242 + C00008	C11736;C00002	C04242;C00008	TK1;TK2
Rid	EC	Irreversible	Pathway	Rid.1	C_in	C_out	Gene_symbol
4109	R00923	4.1.1.-	TRUE	hsa00640	C00683 <=> C00100 + C00011	C00683	C00100;C00011	ECHDC1;HEL-S-76;MMCD;dJ351K20.2
1239	R01859	6.4.1.3	TRUE	hsa00280	C00002 + C00100 + C00288 <=> C00008 + C00009 + C00683	C00002;C00100;C00288	C00008;C00009;C00683	PCCA;PCCB
1240	R01859	6.4.1.3	TRUE	hsa00630	C00002 + C00100 + C00288 <=> C00008 + C00009 + C00683	C00002;C00100;C00288	C00008;C00009;C00683	PCCA;PCCB
1241	R01859	6.4.1.3	TRUE	hsa00640	C00002 + C00100 + C00288 <=> C00008 + C00009 + C00683	C00002;C00100;C00288	C00008;C00009;C00683	PCCA;PCCB
1242	R01859	6.4.1.3	TRUE	hsa01100	C00002 + C00100 + C00288 <=> C00008 + C00009 + C00683	C00002;C00100;C00288	C00008;C00009;C00683	PCCA;PCCB
3868	R08924	6.4.1.3	FALSE		C00002 + C00288 + C00136 + C00080 <=> C00008 + C00009 + C18026	C00002;C00288;C00136;C00080	C00008;C00009;C18026	PCCA;PCCB
1747	R02765	5.1.99.1	TRUE	hsa00280	C01213 <=> C00683	C01213	C00683	MCEE
1748	R02765	5.1.99.1	TRUE	hsa00630	C01213 <=> C00683	C01213	C00683	MCEE
1749	R02765	5.1.99.1	TRUE	hsa00640	C01213 <=> C00683	C01213	C00683	MCEE
1750	R02765	5.1.99.1	TRUE	hsa01100	C01213 <=> C00683	C01213	C00683	MCEE
3992	R09979	5.1.99.1	NA	hsa00630	C18026 <=> C20238	C18026	C20238	MCEE
560	R00833	5.4.99.2	TRUE	hsa00280	C01213 <=> C00091	C01213	C00091	MUT
561	R00833	5.4.99.2	TRUE	hsa00630	C01213 <=> C00091	C01213	C00091	MUT
562	R00833	5.4.99.2	TRUE	hsa00640	C01213 <=> C00091	C01213	C00091	MUT
563	R00833	5.4.99.2	TRUE	hsa01100	C01213 <=> C00091	C01213	C00091	MUT
303	R00432	6.2.1.4	TRUE	hsa00020	C00044 + C00042 + C00010 <=> C00035 + C00009 + C00091	C00044;C00042;C00010	C00035;C00009;C00091	SUCLG2;SUCLG1;SUCLA2
304	R00432	6.2.1.4	TRUE	hsa00640	C00044 + C00042 + C00010 <=> C00035 + C00009 + C00091	C00044;C00042;C00010	C00035;C00009;C00091	SUCLG2;SUCLG1;SUCLA2
305	R00432	6.2.1.4	TRUE	hsa01100	C00044 + C00042 + C00010 <=> C00035 + C00009 + C00091	C00044;C00042;C00010	C00035;C00009;C00091	SUCLG2;SUCLG1;SUCLA2
510	R00727	6.2.1.4	FALSE	hsa00020	C00081 + C00042 + C00010 <=> C00104 + C00009 + C00091	C00081;C00042;C00010	C00104;C00009;C00091	SUCLG2;SUCLG1;SUCLA2
511	R00727	6.2.1.4	FALSE	hsa01100	C00081 + C00042 + C00010 <=> C00104 + C00009 + C00091	C00081;C00042;C00010	C00104;C00009;C00091	SUCLG2;SUCLG1;SUCLA2
1560	R02405	6.2.1.4	FALSE		C00044 + C00490 + C00010 <=> C00035 + C00009 + C00531	C00044;C00490;C00010	C00035;C00009;C00531	SUCLG2;SUCLG1;SUCLA2
1561	R02406	6.2.1.4	FALSE		C00081 + C00490 + C00010 <=> C00104 + C00009 + C00531	C00081;C00490;C00010	C00104;C00009;C00531	SUCLG2;SUCLG1;SUCLA2
279	R00405	6.2.1.5	TRUE	hsa00020	C00002 + C00042 + C00010 <=> C00008 + C00009 + C00091	C00002;C00042;C00010	C00008;C00009;C00091	SUCLG2;SUCLG1;SUCLA2
280	R00405	6.2.1.5	TRUE	hsa00640	C00002 + C00042 + C00010 <=> C00008 + C00009 + C00091	C00002;C00042;C00010	C00008;C00009;C00091	SUCLG2;SUCLG1;SUCLA2
281	R00405	6.2.1.5	TRUE	hsa01100	C00002 + C00042 + C00010 <=> C00008 + C00009 + C00091	C00002;C00042;C00010	C00008;C00009;C00091	SUCLG2;SUCLG1;SUCLA2
Rid	EC	Irreversible	Pathway	Rid.1	C_in	C_out	Gene_symbol
827	R01175	1.3.8.1	NA	hsa00071	C00136 + C00016 <=> C01352 + C00877	C00136;C00016	C01352;C00877	ACADS
829	R01175	1.3.8.1	NA	hsa00650	C00136 + C00016 <=> C01352 + C00877	C00136;C00016	C01352;C00877	ACADS
831	R01175	1.3.8.1	NA	hsa01100	C00136 + C00016 <=> C01352 + C00877	C00136;C00016	C01352;C00877	ACADS
841	R01178	1.3.8.1	NA		C20675 + C04253 <=> C20676 + C04570	C20675;C04253	C20676;C04570	ACADS
1681	R02661	1.3.8.1	NA	hsa00280	C00630 + C00028 <=> C03460 + C00030	C00630;C00028	C03460;C00030	ACADS
1685	R02661	1.3.8.1	NA	hsa01100	C00630 + C00028 <=> C03460 + C00030	C00630;C00028	C03460;C00030	ACADS
1904	R03172	1.3.8.1	NA	hsa00280	C15980 + C00028 <=> C03345 + C00030	C15980;C00028	C03345;C00030	ACADS
1907	R03172	1.3.8.1	NA	hsa01100	C15980 + C00028 <=> C03345 + C00030	C15980;C00028	C03345;C00030	ACADS
2576	R04751	1.3.8.1	NA	hsa00071	C05270 + C00016 <=> C05271 + C01352	C05270;C00016	C05271;C01352	ACADS
2580	R04751	1.3.8.1	NA	hsa01100	C05270 + C00016 <=> C05271 + C01352	C05270;C00016	C05271;C01352	ACADS
4060	R01178	1.3.8.1	FALSE	hsa00640	C20675 + C04253 <=> C20676 + C04570	C20675;C04253	C20676;C04570	ACADS;ACAD3;SCAD
4061	R01175	1.3.8.1	FALSE	hsa00640	C00136 + C00016 <=> C01352 + C00877	C00136;C00016	C01352;C00877	ACADS;ACAD3;SCAD
4062	R04751	1.3.8.1	FALSE	hsa00640	C05270 + C00016 <=> C05271 + C01352	C05270;C00016	C05271;C01352	ACADS;ACAD3;SCAD
4063	R02661	1.3.8.1	FALSE	hsa00640	C00630 + C00028 <=> C03460 + C00030	C00630;C00028	C03460;C00030	ACADS;ACAD3;SCAD
4064	R03172	1.3.8.1	FALSE	hsa00640	C15980 + C00028 <=> C03345 + C00030	C15980;C00028	C03345;C00030	ACADS;ACAD3;SCAD
4065	R04432	1.3.8.1	FALSE	hsa00640	C04253 + C00100 <=> C04570 + C00894	C04253;C00100	C04570;C00894	ACADS;ACAD3;SCAD
272	R00388	1.3.3.6	TRUE		C00040 + C00007 <=> C00658 + C00027	C00040;C00007	C00658;C00027	ACOX1;ACOX3
826	R01175	1.3.3.6	FALSE	hsa00071	C00136 + C00016 <=> C01352 + C00877	C00136;C00016	C01352;C00877	ACOX1;ACOX3
830	R01175	1.3.3.6	FALSE	hsa01100	C00136 + C00016 <=> C01352 + C00877	C00136;C00016	C01352;C00877	ACOX1;ACOX3
900	R01279	1.3.3.6	FALSE	hsa00071	C00154 + C00016 <=> C05272 + C01352	C00154;C00016	C05272;C01352	ACOX1;ACOX3
904	R01279	1.3.3.6	FALSE	hsa01100	C00154 + C00016 <=> C05272 + C01352	C00154;C00016	C05272;C01352	ACOX1;ACOX3
2141	R03777	1.3.3.6	FALSE	hsa00071	C01944 + C00016 <=> C05276 + C01352	C01944;C00016	C05276;C01352	ACOX1;ACOX3
2144	R03777	1.3.3.6	FALSE	hsa01100	C01944 + C00016 <=> C05276 + C01352	C01944;C00016	C05276;C01352	ACOX1;ACOX3
2174	R03857	1.3.3.6	FALSE	hsa00071	C01832 + C00016 <=> C03221 + C01352	C01832;C00016	C03221;C01352	ACOX1;ACOX3
2177	R03857	1.3.3.6	FALSE	hsa01100	C01832 + C00016 <=> C03221 + C01352	C01832;C00016	C03221;C01352	ACOX1;ACOX3
2226	R03990	1.3.3.6	FALSE	hsa00071	C02593 + C00016 <=> C05273 + C01352	C02593;C00016	C05273;C01352	ACOX1;ACOX3
2230	R03990	1.3.3.6	FALSE	hsa01100	C02593 + C00016 <=> C05273 + C01352	C02593;C00016	C05273;C01352	ACOX1;ACOX3
2575	R04751	1.3.3.6	FALSE	hsa00071	C05270 + C00016 <=> C05271 + C01352	C05270;C00016	C05271;C01352	ACOX1;ACOX3
2579	R04751	1.3.3.6	FALSE	hsa01100	C05270 + C00016 <=> C05271 + C01352	C05270;C00016	C05271;C01352	ACOX1;ACOX3
2585	R04754	1.3.3.6	FALSE	hsa00071	C05274 + C00016 <=> C05275 + C01352	C05274;C00016	C05275;C01352	ACOX1;ACOX3
2588	R04754	1.3.3.6	FALSE	hsa01100	C05274 + C00016 <=> C05275 + C01352	C05274;C00016	C05275;C01352	ACOX1;ACOX3
3610	R07888	1.3.3.6	FALSE	hsa00592	C16327 + C00016 <=> C16328 + C01352	C16327;C00016	C16328;C01352	ACOX1;ACOX3
3611	R07888	1.3.3.6	FALSE	hsa01100	C16327 + C00016 <=> C16328 + C01352	C16327;C00016	C16328;C01352	ACOX1;ACOX3
3617	R07892	1.3.3.6	FALSE	hsa00592	C16331 + C00016 <=> C16332 + C01352	C16331;C00016	C16332;C01352	ACOX1;ACOX3
3618	R07892	1.3.3.6	FALSE	hsa01100	C16331 + C00016 <=> C16332 + C01352	C16331;C00016	C16332;C01352	ACOX1;ACOX3
3624	R07896	1.3.3.6	FALSE	hsa00592	C16335 + C00016 <=> C16336 + C01352	C16335;C00016	C16336;C01352	ACOX1;ACOX3
3625	R07896	1.3.3.6	FALSE	hsa01100	C16335 + C00016 <=> C16336 + C01352	C16335;C00016	C16336;C01352	ACOX1;ACOX3
3631	R07934	1.3.3.6	FALSE	hsa01040	C16168 + C00016 <=> C16374 + C01352	C16168;C00016	C16374;C01352	ACOX1;ACOX3
3645	R07950	1.3.3.6	FALSE	hsa01040	C16172 + C00016 <=> C16387 + C01352	C16172;C00016	C16387;C01352	ACOX1;ACOX3
4066	R00388	1.3.3.6	FALSE	hsa00640	C00040 + C00007 <=> C00658 + C00027	C00040;C00007	C00658;C00027	ACOX1;ACOX;PALMCOX;SCOX
4067	R07934	1.3.3.6	FALSE	hsa00640	C16168 + C00007 <=> C16374 + C00027	C16168;C00007	C16374;C00027	ACOX1;ACOX;PALMCOX;SCOX
4068	R07950	1.3.3.6	FALSE	hsa00640	C16172 + C00007 <=> C16387 + C00027	C16172;C00007	C16387;C00027	ACOX1;ACOX;PALMCOX;SCOX
4069	R01175	1.3.3.6	FALSE	hsa00640	C00136 + C00016 <=> C01352 + C00877	C00136;C00016	C01352;C00877	ACOX1;ACOX;PALMCOX;SCOX
4070	R01279	1.3.3.6	FALSE	hsa00640	C00154 + C00016 <=> C05272 + C01352	C00154;C00016	C05272;C01352	ACOX1;ACOX;PALMCOX;SCOX
4071	R03777	1.3.3.6	FALSE	hsa00640	C01944 + C00016 <=> C05276 + C01352	C01944;C00016	C05272;C01352	ACOX1;ACOX;PALMCOX;SCOX
4072	R03857	1.3.3.6	FALSE	hsa00640	C01832 + C00016 <=> C03221 + C01352	C01832;C00016	C03221;C01352	ACOX1;ACOX;PALMCOX;SCOX
4073	R03990	1.3.3.6	FALSE	hsa00640	C02593 + C00016 <=> C05273 + C01352	C02593;C00016	C05273;C01352	ACOX1;ACOX;PALMCOX;SCOX
4074	R04751	1.3.3.6	FALSE	hsa00640	C05270 + C00016 <=> C05271 + C01352	C05270;C00016	C05271;C01352	ACOX1;ACOX;PALMCOX;SCOX
4075	R04754	1.3.3.6	FALSE	hsa00640	C05274 + C00016 <=> C05275 + C01352	C05274;C00016	C05275;C01352	ACOX1;ACOX;PALMCOX;SCOX
4076	R07888	1.3.3.6	FALSE	hsa00640	C16327 + C00016 <=> C16328 + C01352	C16327;C00016	C16328;C01352	ACOX1;ACOX;PALMCOX;SCOX
4077	R07892	1.3.3.6	FALSE	hsa00640	C16331 + C00016 <=> C16332 + C01352	C16331;C00016	C16332;C01352	ACOX1;ACOX;PALMCOX;SCOX
4078	R07896	1.3.3.6	FALSE	hsa00640	C16335 + C00016 <=> C16336 + C01352	C16335;C00016	C16336;C01352	ACOX1;ACOX;PALMCOX;SCOX
4079	R12356	1.3.3.6	FALSE	hsa00640	C00100 + C00007 <=> C00894 + C00027	C00100;C00007	C00894;C00027	ACOX1;ACOX;PALMCOX;SCOX
1699	R02685	4.2.1.17	TRUE	hsa00062	C00640 <=> C00658 + C00001	C00640	C00658;C00001	ECHS1;HADHA
1850	R03026	4.2.1.17	FALSE	hsa00071	C01144 <=> C00877 + C00001	C01144	C00877;C00001	ECHS1;EHHADH;HADHA
1851	R03026	4.2.1.17	FALSE	hsa00310	C01144 <=> C00877 + C00001	C01144	C00877;C00001	ECHS1;EHHADH;HADHA
1852	R03026	4.2.1.17	FALSE	hsa00380	C01144 <=> C00877 + C00001	C01144	C00877;C00001	ECHS1;EHHADH;HADHA
1853	R03026	4.2.1.17	FALSE	hsa00650	C01144 <=> C00877 + C00001	C01144	C00877;C00001	ECHS1;EHHADH;HADHA
1854	R03026	4.2.1.17	FALSE	hsa01100	C01144 <=> C00877 + C00001	C01144	C00877;C00001	ECHS1;EHHADH;HADHA
1861	R03045	4.2.1.17	FALSE	hsa00410	C05668 <=> C00894 + C00001	C05668	C00894;C00001	ECHS1;EHHADH;HADHA
1862	R03045	4.2.1.17	FALSE	hsa00640	C05668 <=> C00894 + C00001	C05668	C00894;C00001	ECHS1;EHHADH;HADHA
1863	R03045	4.2.1.17	FALSE	hsa01100	C05668 <=> C00894 + C00001	C05668	C00894;C00001	ECHS1;EHHADH;HADHA
1930	R03224	4.2.1.17	FALSE		C01086 <=> C01122 + C00001	C01086	C01122;C00001	ECHS1;EHHADH;HADHA
2276	R04137	4.2.1.17	FALSE	hsa00280	C05998 <=> C03069 + C00001	C05998	C03069;C00001	ECHS1;EHHADH;HADHA
2288	R04170	4.2.1.17	FALSE	hsa00062	C05262 <=> C03221 + C00001	C05262	C03221;C00001	ECHS1;HADHA
2289	R04170	4.2.1.17	FALSE	hsa00071	C05262 <=> C03221 + C00001	C05262	C03221;C00001	ECHS1;EHHADH;HADHA
2290	R04170	4.2.1.17	FALSE	hsa01100	C05262 <=> C03221 + C00001	C05262	C03221;C00001	ECHS1;EHHADH;HADHA
2304	R04204	4.2.1.17	FALSE	hsa00280	C04405 <=> C03345 + C00001	C04405	C03345;C00001	ECHS1;EHHADH;HADHA
2305	R04204	4.2.1.17	FALSE	hsa01100	C04405 <=> C03345 + C00001	C04405	C03345;C00001	ECHS1;EHHADH;HADHA
2314	R04224	4.2.1.17	FALSE	hsa00280	C03460 + C00001 <=> C06000	C03460;C00001	C06000	ECHS1;EHHADH;HADHA
2315	R04224	4.2.1.17	FALSE	hsa01100	C03460 + C00001 <=> C06000	C03460;C00001	C06000	ECHS1;EHHADH;HADHA
2524	R04738	4.2.1.17	FALSE	hsa00062	C05258 <=> C05272 + C00001	C05258	C05272;C00001	ECHS1;HADHA
2525	R04738	4.2.1.17	FALSE	hsa00071	C05258 <=> C05272 + C00001	C05258	C05272;C00001	ECHS1;EHHADH;HADHA
2526	R04738	4.2.1.17	FALSE	hsa01100	C05258 <=> C05272 + C00001	C05258	C05272;C00001	ECHS1;EHHADH;HADHA
2533	R04740	4.2.1.17	FALSE	hsa00062	C05260 <=> C05273 + C00001	C05260	C05273;C00001	ECHS1;HADHA
2534	R04740	4.2.1.17	FALSE	hsa00071	C05260 <=> C05273 + C00001	C05260	C05273;C00001	ECHS1;EHHADH;HADHA
2535	R04740	4.2.1.17	FALSE	hsa01100	C05260 <=> C05273 + C00001	C05260	C05273;C00001	ECHS1;EHHADH;HADHA
2551	R04744	4.2.1.17	FALSE	hsa00062	C05264 <=> C05275 + C00001	C05264	C05275;C00001	ECHS1;HADHA
2552	R04744	4.2.1.17	FALSE	hsa00071	C05264 <=> C05275 + C00001	C05264	C05275;C00001	ECHS1;EHHADH;HADHA
2553	R04744	4.2.1.17	FALSE	hsa01100	C05264 <=> C05275 + C00001	C05264	C05275;C00001	ECHS1;EHHADH;HADHA
2560	R04746	4.2.1.17	FALSE	hsa00062	C05266 <=> C05276 + C00001	C05266	C05276;C00001	ECHS1;HADHA
2561	R04746	4.2.1.17	FALSE	hsa00071	C05266 <=> C05276 + C00001	C05266	C05276;C00001	ECHS1;EHHADH;HADHA
2562	R04746	4.2.1.17	FALSE	hsa01100	C05266 <=> C05276 + C00001	C05266	C05276;C00001	ECHS1;EHHADH;HADHA
2572	R04749	4.2.1.17	FALSE	hsa00062	C05268 <=> C05271 + C00001	C05268	C05271;C00001	ECHS1;HADHA
2573	R04749	4.2.1.17	FALSE	hsa00071	C05268 <=> C05271 + C00001	C05268	C05271;C00001	ECHS1;EHHADH;HADHA
2574	R04749	4.2.1.17	FALSE	hsa01100	C05268 <=> C05271 + C00001	C05268	C05271;C00001	ECHS1;EHHADH;HADHA
2858	R05595	4.2.1.17	FALSE		C00877 + C00001 <=> C05116	C00877;C00001	C05116	ECHS1;EHHADH;HADHA
3253	R06942	4.2.1.17	FALSE	hsa01100	C14144 + C00001 <=> C14145	C14144;C00001	C14145	ECHS1;EHHADH;HADHA
3410	R07314	4.2.1.17	TRUE		C00640 <=> C05067 + C00001	C00640	C05067;C00001	ECHS1;EHHADH;HADHA
3612	R07889	4.2.1.17	FALSE	hsa01100	C16329 <=> C16328 + C00001	C16329	C16328;C00001	ECHS1;EHHADH;HADHA
3619	R07893	4.2.1.17	FALSE	hsa01100	C16333 <=> C16332 + C00001	C16333	C16332;C00001	ECHS1;EHHADH;HADHA
3626	R07897	4.2.1.17	FALSE	hsa01100	C16337 <=> C16336 + C00001	C16337	C16336;C00001	ECHS1;EHHADH;HADHA
133	R00233	4.1.1.9	TRUE	hsa00410	C00083 <=> C00024 + C00011	C00083	C00024;C00011	MLYCD
134	R00233	4.1.1.9	TRUE	hsa00640	C00083 <=> C00024 + C00011	C00083	C00024;C00011	MLYCD
135	R00233	4.1.1.9	TRUE	hsa01100	C00083 <=> C00024 + C00011	C00083	C00024;C00011	MLYCD
2833	R05373	4.1.1.9	FALSE		C02557 <=> C00100 + C00011	C02557	C00100;C00011	MLYCD
525	R00742	6.4.1.2	TRUE	hsa00620	C00002 + C00024 + C00288 <=> C00008 + C00009 + C00083	C00002;C00024;C00288	C00008;C00009;C00083	ACACA;ACACB
526	R00742	6.4.1.2	TRUE	hsa00640	C00002 + C00024 + C00288 <=> C00008 + C00009 + C00083	C00002;C00024;C00288	C00008;C00009;C00083	ACACA;ACACB
527	R00742	6.4.1.2	TRUE	hsa01100	C00002 + C00024 + C00288 <=> C00008 + C00009 + C00083	C00002;C00024;C00288	C00008;C00009;C00083	ACACA;ACACB
2381	R04386	6.4.1.2	FALSE	hsa00061	C00024 + C04419 <=> C00083 + C06250	C00024;C04419	C00083;C06250	ACACA;ACACB
2382	R04386	6.4.1.2	FALSE	hsa01100	C00024 + C04419 <=> C00083 + C06250	C00024;C04419	C00083;C06250	ACACA;ACACB
Rid	EC	Irreversible	Pathway	Rid.1	C_in	C_out	Gene_symbol
165	R00253	6.3.1.2	TRUE	hsa00250	C00002 + C00025 + C00014 <=> C00008 + C00009 + C00064	C00002;C00025;C00014	C00008;C00009;C00064	GLUL
166	R00253	6.3.1.2	TRUE	hsa00330	C00002 + C00025 + C00014 <=> C00008 + C00009 + C00064	C00002;C00025;C00014	C00008;C00009;C00064	GLUL
167	R00253	6.3.1.2	TRUE	hsa00630	C00002 + C00025 + C00014 <=> C00008 + C00009 + C00064	C00002;C00025;C00014	C00008;C00009;C00064	GLUL
168	R00253	6.3.1.2	TRUE	hsa00910	C00002 + C00025 + C00014 <=> C00008 + C00009 + C00064	C00002;C00025;C00014	C00008;C00009;C00064	GLUL
169	R00253	6.3.1.2	TRUE	hsa01100	C00002 + C00025 + C00014 <=> C00008 + C00009 + C00064	C00002;C00025;C00014	C00008;C00009;C00064	GLUL
170	R00256	3.5.1.2	TRUE	hsa00250	C00064 + C00001 <=> C00025 + C00014	C00064;C00001	C00025;C00014	GLS2;GLS
171	R00256	3.5.1.2	TRUE	hsa00330	C00064 + C00001 <=> C00025 + C00014	C00064;C00001	C00025;C00014	GLS2;GLS
172	R00256	3.5.1.2	TRUE	hsa00471	C00064 + C00001 <=> C00025 + C00014	C00064;C00001	C00025;C00014	GLS2;GLS
173	R00256	3.5.1.2	TRUE	hsa01100	C00064 + C00001 <=> C00025 + C00014	C00064;C00001	C00025;C00014	GLS2;GLS
1068	R01579	3.5.1.2	FALSE	hsa00471	C00819 + C00001 <=> C00217 + C00014	C00819;C00001	C00217;C00014	GLS2;GLS
1069	R01579	3.5.1.2	FALSE	hsa01100	C00819 + C00001 <=> C00217 + C00014	C00819;C00001	C00217;C00014	GLS2;GLS
3135	R06134	3.5.1.2	FALSE		C00241 + C00001 <=> C00060 + C00014	C00241;C00001	C00060;C00014	GLS2;GLS
Rid	EC	Irreversible	Pathway	Rid.1	C_in	C_out	Gene_symbol
180	R00261	4.1.1.15	TRUE	hsa00250	C00025 <=> C00334 + C00011	C00025	C00334;C00011	GAD1;GAD2
181	R00261	4.1.1.15	TRUE	hsa00650	C00025 <=> C00334 + C00011	C00025	C00334;C00011	GAD1;GAD2
182	R00261	4.1.1.15	TRUE	hsa01100	C00025 <=> C00334 + C00011	C00025	C00334;C00011	GAD1;GAD2
333	R00489	4.1.1.15	FALSE	hsa00410	C00049 <=> C00099 + C00011	C00049	C00099;C00011	GAD1;GAD2
334	R00489	4.1.1.15	FALSE	hsa01100	C00049 <=> C00099 + C00011	C00049	C00099;C00011	GAD1;GAD2
1120	R01682	4.1.1.15	FALSE	hsa00430	C00506 <=> C00245 + C00011	C00506	C00245;C00011	GAD1;GAD2
1122	R01682	4.1.1.15	FALSE	hsa01100	C00506 <=> C00245 + C00011	C00506	C00245;C00011	GAD1;GAD2
1570	R02466	4.1.1.15	FALSE	hsa00430	C00606 <=> C00519 + C00011	C00606	C00519;C00011	GAD1;GAD2
1572	R02466	4.1.1.15	FALSE	hsa01100	C00606 <=> C00519 + C00011	C00606	C00519;C00011	GAD1;GAD2
Rid	EC	Irreversible	Pathway	Rid.1	C_in	C_out	Gene_symbol
608	R00908	2.6.1.19	FALSE	hsa00410	C00099 + C00026 <=> C00222 + C00025	C00099;C00026	C00222;C00025	ABAT
609	R00908	2.6.1.19	FALSE	hsa00640	C00099 + C00026 <=> C00222 + C00025	C00099;C00026	C00222;C00025	ABAT
610	R00908	2.6.1.19	FALSE	hsa01100	C00099 + C00026 <=> C00222 + C00025	C00099;C00026	C00222;C00025	ABAT
1094	R01648	2.6.1.19	TRUE	hsa00250	C00334 + C00026 <=> C00232 + C00025	C00334;C00026	C00232;C00025	ABAT
1095	R01648	2.6.1.19	TRUE	hsa00650	C00334 + C00026 <=> C00232 + C00025	C00334;C00026	C00232;C00025	ABAT
1096	R01648	2.6.1.19	TRUE	hsa01100	C00334 + C00026 <=> C00232 + C00025	C00334;C00026	C00232;C00025	ABAT
496	R00713	1.2.1.24	TRUE	hsa00250	C00232 + C00003 + C00001 <=> C00042 + C00004 + C00080	C00232;C00003;C00001	C00042;C00004;C00080	ALDH5A1
497	R00713	1.2.1.24	TRUE	hsa00650	C00232 + C00003 + C00001 <=> C00042 + C00004 + C00080	C00232;C00003;C00001	C00042;C00004;C00080	ALDH5A1
498	R00713	1.2.1.24	TRUE	hsa01100	C00232 + C00003 + C00001 <=> C00042 + C00004 + C00080	C00232;C00003;C00001	C00042;C00004;C00080	ALDH5A1
Rid	EC	Irreversible	Pathway	Rid.1	C_in	C_out	Gene_symbol
63	R00145	1.4.1.3	FALSE		C05167 + C00001 + C00003 <=> C00161 + C00014 + C00004 + C00080	C05167;C00001;C00003	C00161;C00014;C00004;C00080	GLUD1;GLUD2
64	R00146	1.4.1.3	FALSE		C05167 + C00001 + C00006 <=> C00161 + C00014 + C00005 + C00080	C05167;C00001;C00006	C00161;C00014;C00005;C00080	GLUD1;GLUD2
153	R00243	1.4.1.3	TRUE	hsa00250	C00025 + C00003 + C00001 <=> C00026 + C00014 + C00004 + C00080	C00025;C00003;C00001	C00026;C00014;C00004;C00080	GLUD1;GLUD2
154	R00243	1.4.1.3	TRUE	hsa00330	C00025 + C00003 + C00001 <=> C00026 + C00014 + C00004 + C00080	C00025;C00003;C00001	C00026;C00014;C00004;C00080	GLUD1;GLUD2
155	R00243	1.4.1.3	TRUE	hsa00471	C00025 + C00003 + C00001 <=> C00026 + C00014 + C00004 + C00080	C00025;C00003;C00001	C00026;C00014;C00004;C00080	GLUD1;GLUD2
156	R00243	1.4.1.3	TRUE	hsa00910	C00025 + C00003 + C00001 <=> C00026 + C00014 + C00004 + C00080	C00025;C00003;C00001	C00026;C00014;C00004;C00080	GLUD1;GLUD2
157	R00243	1.4.1.3	TRUE	hsa01100	C00025 + C00003 + C00001 <=> C00026 + C00014 + C00004 + C00080	C00025;C00003;C00001	C00026;C00014;C00004;C00080	GLUD1;GLUD2
159	R00248	1.4.1.3	TRUE	hsa00250	C00025 + C00006 + C00001 <=> C00026 + C00014 + C00005 + C00080	C00025;C00006;C00001	C00026;C00014;C00005;C00080	GLUD1;GLUD2
160	R00248	1.4.1.3	TRUE	hsa00330	C00025 + C00006 + C00001 <=> C00026 + C00014 + C00005 + C00080	C00025;C00006;C00001	C00026;C00014;C00005;C00080	GLUD1;GLUD2
161	R00248	1.4.1.3	TRUE	hsa00471	C00025 + C00006 + C00001 <=> C00026 + C00014 + C00005 + C00080	C00025;C00006;C00001	C00026;C00014;C00005;C00080	GLUD1;GLUD2
162	R00248	1.4.1.3	TRUE	hsa00910	C00025 + C00006 + C00001 <=> C00026 + C00014 + C00005 + C00080	C00025;C00006;C00001	C00026;C00014;C00005;C00080	GLUD1;GLUD2
163	R00248	1.4.1.3	TRUE	hsa01100	C00025 + C00006 + C00001 <=> C00026 + C00014 + C00005 + C00080	C00025;C00006;C00001	C00026;C00014;C00005;C00080	GLUD1;GLUD2
Rid	EC	Irreversible	Pathway	Rid.1	C_in	C_out	Gene_symbol
824	R01168	4.3.1.3	TRUE	hsa00340	C00135 <=> C00785 + C00014	C00135	C00785;C00014	HAL
825	R01168	4.3.1.3	TRUE	hsa01100	C00135 <=> C00785 + C00014	C00135	C00785;C00014	HAL
3131	R06132	4.3.1.3	FALSE		C05167 <=> C11823 + C00014	C05167	C11823;C00014	HAL
1816	R02914	4.2.1.49	TRUE	hsa00340	C03680 <=> C00785 + C00001	C03680	C00785;C00001	UROC1
1817	R02914	4.2.1.49	TRUE	hsa01100	C03680 <=> C00785 + C00001	C03680	C00785;C00001	UROC1
1500	R02288	3.5.2.7	TRUE	hsa00340	C03680 + C00001 <=> C00439	C03680;C00001	C00439	AMDHD1
1501	R02288	3.5.2.7	TRUE	hsa01100	C03680 + C00001 <=> C00439	C03680;C00001	C00439	AMDHD1
1497	R02287	2.1.2.5	TRUE	hsa00340	C00664 + C00025 <=> C00101 + C00439	C00664;C00025	C00101;C00439	FTCD
1498	R02287	2.1.2.5	TRUE	hsa00670	C00664 + C00025 <=> C00101 + C00439	C00664;C00025	C00101;C00439	FTCD
1499	R02287	2.1.2.5	TRUE	hsa01100	C00664 + C00025 <=> C00101 + C00439	C00664;C00025	C00101;C00439	FTCD
1916	R03189	2.1.2.5	FALSE	hsa00670	C03479 + C00025 <=> C00101 + C01045	C03479;C00025	C00101;C01045	FTCD
1917	R03189	2.1.2.5	FALSE	hsa01100	C03479 + C00025 <=> C00101 + C01045	C03479;C00025	C00101;C01045	FTCD
Rid	EC	Irreversible	Pathway	Rid.1	C_in	C_out	Gene_symbol
763	R01090	2.6.1.42	TRUE	hsa00280	C00123 + C00026 <=> C00233 + C00025	C00123;C00026	C00233;C00025	BCAT1;BCAT2
855	R01214	2.6.1.42	FALSE	hsa00280	C00183 + C00026 <=> C00141 + C00025	C00183;C00026	C00141;C00025	BCAT1;BCAT2
1441	R02199	2.6.1.42	FALSE	hsa00280	C00407 + C00026 <=> C00671 + C00025	C00407;C00026	C00671;C00025	BCAT1;BCAT2
3517	R07599	1.2.4.4	FALSE	hsa00280	C00141 + C00068 <=> C15976 + C00011	C00141;C00068	C15976;C00011	BCKDHA;BCKDHB
3519	R07600	1.2.4.4	FALSE	hsa00280	C15976 + C15972 <=> C15977 + C00068	C15976;C15972	C15977;C00068	BCKDHA;BCKDHB
3521	R07601	1.2.4.4	FALSE	hsa00280	C00233 + C00068 <=> C15974 + C00011	C00233;C00068	C15974;C00011	BCKDHA;BCKDHB
3523	R07602	1.2.4.4	FALSE	hsa00280	C15974 + C15972 <=> C15975 + C00068	C15974;C15972	C15975;C00068	BCKDHA;BCKDHB
3525	R07603	1.2.4.4	FALSE	hsa00280	C00671 + C00068 <=> C15978 + C00011	C00671;C00068	C15978;C00011	BCKDHA;BCKDHB
3527	R07604	1.2.4.4	FALSE	hsa00280	C15978 + C15972 <=> C15979 + C00068	C15978;C15972	C15979;C00068	BCKDHA;BCKDHB
3535	R07618	1.8.1.4	FALSE	hsa00280	C15973 + C00003 <=> C15972 + C00004 + C00080	C15973;C00003	C15972;C00004;C00080	DLD
1689	R02662	2.3.1.168	TRUE	hsa00280	C00630 + C15973 <=> C00010 + C15977	C00630;C15973	C00010;C15977	DBT
1911	R03174	2.3.1.168	FALSE	hsa00280	C15980 + C15973 <=> C00010 + C15979	C15980;C15973	C00010;C15979	DBT
2265	R04097	2.3.1.168	FALSE	hsa00280	C02939 + C15973 <=> C00010 + C15975	C02939;C15973	C00010;C15975	DBT
2260	R04095	1.3.8.4	NA	hsa00280	C02939 + C00016 <=> C03069 + C01352	C02939;C00016	C03069;C01352	IVD
1682	R02661	1.3.8.7	NA	hsa00280	C00630 + C00028 <=> C03460 + C00030	C00630;C00028	C03460;C00030	ACADM
1905	R03172	1.3.8.7	NA	hsa00280	C15980 + C00028 <=> C03345 + C00030	C15980;C00028	C03345;C00030	ACADM
2261	R04095	1.3.8.7	NA	hsa00280	C02939 + C00016 <=> C03069 + C01352	C02939;C00016	C03069;C01352	ACADM
2276	R04137	4.2.1.17	FALSE	hsa00280	C05998 <=> C03069 + C00001	C05998	C03069;C00001	ECHS1;EHHADH;HADHA
2304	R04204	4.2.1.17	FALSE	hsa00280	C04405 <=> C03345 + C00001	C04405	C03345;C00001	ECHS1;EHHADH;HADHA
2314	R04224	4.2.1.17	FALSE	hsa00280	C03460 + C00001 <=> C06000	C03460;C00001	C06000	ECHS1;EHHADH;HADHA
2277	R04138	6.4.1.4	TRUE	hsa00280	C00002 + C03069 + C00288 <=> C00008 + C00009 + C03231	C00002;C03069;C00288	C00008;C00009;C03231	MCCC1;MCCC2
1368	R02085	4.2.1.18	TRUE	hsa00280	C00356 <=> C03231 + C00001	C00356	C03231;C00001	AUH
955	R01360	4.1.3.4	TRUE	hsa00280	C00356 <=> C00024 + C00164	C00356	C00024;C00164	HMGCL
1318	R01978	2.3.3.10	TRUE	hsa00280	C00356 + C00010 <=> C00024 + C00001 + C00332	C00356;C00010	C00024;C00001;C00332	HMGCS1;HMGCS2
283	R00410	2.8.3.5	FALSE	hsa00280	C00091 + C00164 <=> C00042 + C00332	C00091;C00164	C00042;C00332	OXCT1;OXCT2
4080	R01357	6.2.1.16	TRUE	hsa00280	C00002 + C00164 + C00010 <=> C00020 + C00013 + C00332	C00002;C00164;C00010	C00020;C00013;C00332	AACS;ACSF1;SUR-5
142	R00238	2.3.1.9	TRUE	hsa00280	2 C00024 <=> C00010 + C00332	C00024	C00010;C00332	ACAT1;ACAT2
621	R00927	2.3.1.9	FALSE	hsa00280	C00100 + C00024 <=> C00010 + C03344	C00100;C00024	C00010;C03344	ACAT1;ACAT2
Rid	EC	Irreversible	Pathway	Rid.1	C_in	C_out	Gene_symbol
R01090	R01090	2.6.1.42	TRUE	hsa00280	C00123 + C00026 <=> C00233 + C00025	C00123;C00026	C00233;C00025	BCAT1;BCAT2
R01214	R01214	2.6.1.42	FALSE	hsa00280	C00183 + C00026 <=> C00141 + C00025	C00183;C00026	C00141;C00025	BCAT1;BCAT2
R02199	R02199	2.6.1.42	FALSE	hsa00280	C00407 + C00026 <=> C00671 + C00025	C00407;C00026	C00671;C00025	BCAT1;BCAT2
R07599	R07599	1.2.4.4	FALSE	hsa00280	C00141 + C00068 <=> C15976 + C00011	C00141;C00068	C15976;C00011	BCKDHA;BCKDHB
R07600	R07600	1.2.4.4	FALSE	hsa00280	C15976 + C15972 <=> C15977 + C00068	C15976;C15972	C15977;C00068	BCKDHA;BCKDHB
R07601	R07601	1.2.4.4	FALSE	hsa00280	C00233 + C00068 <=> C15974 + C00011	C00233;C00068	C15974;C00011	BCKDHA;BCKDHB
R07602	R07602	1.2.4.4	FALSE	hsa00280	C15974 + C15972 <=> C15975 + C00068	C15974;C15972	C15975;C00068	BCKDHA;BCKDHB
R07603	R07603	1.2.4.4	FALSE	hsa00280	C00671 + C00068 <=> C15978 + C00011	C00671;C00068	C15978;C00011	BCKDHA;BCKDHB
R07604	R07604	1.2.4.4	FALSE	hsa00280	C15978 + C15972 <=> C15979 + C00068	C15978;C15972	C15979;C00068	BCKDHA;BCKDHB
R07618	R07618	1.8.1.4	FALSE	hsa00280	C15973 + C00003 <=> C15972 + C00004 + C00080	C15973;C00003	C15972;C00004;C00080	DLD
R02662	R02662	2.3.1.168	TRUE	hsa00280	C00630 + C15973 <=> C00010 + C15977	C00630;C15973	C00010;C15977	DBT
R03174	R03174	2.3.1.168	FALSE	hsa00280	C15980 + C15973 <=> C00010 + C15979	C15980;C15973	C00010;C15979	DBT
R04097	R04097	2.3.1.168	FALSE	hsa00280	C02939 + C15973 <=> C00010 + C15975	C02939;C15973	C00010;C15975	DBT
R02661	R02661	1.3.8.7	NA	hsa00280	C00630 + C00028 <=> C03460 + C00030	C00630;C00028	C03460;C00030	ACADM
R03172	R03172	1.3.8.7	NA	hsa00280	C15980 + C00028 <=> C03345 + C00030	C15980;C00028	C03345;C00030	ACADM
R04095	R04095	1.3.8.7	NA	hsa00280	C02939 + C00016 <=> C03069 + C01352	C02939;C00016	C03069;C01352	ACADM
R02661.1	R02661	1.3.8.1	NA	hsa00280	C00630 + C00028 <=> C03460 + C00030	C00630;C00028	C03460;C00030	ACADS
R03172.1	R03172	1.3.8.1	NA	hsa00280	C15980 + C00028 <=> C03345 + C00030	C15980;C00028	C03345;C00030	ACADS
R02661.2	R02661	1.3.99.12	FALSE	hsa00280	C00630 + C00028 <=> C03460 + C00030	C00630;C00028	C03460;C00030	ACADSB
R03172.2	R03172	1.3.99.12	FALSE	hsa00280	C15980 + C00028 <=> C03345 + C00030	C15980;C00028	C03345;C00030	ACADSB
R02661.3	R02661	1.3.99.-	NA	hsa00280	C00630 + C00028 <=> C03460 + C00030	C00630;C00028	C03460;C00030	ACAD8
R04137	R04137	4.2.1.17	FALSE	hsa00280	C05998 <=> C03069 + C00001	C05998	C03069;C00001	ECHS1;EHHADH;HADHA
R04204	R04204	4.2.1.17	FALSE	hsa00280	C04405 <=> C03345 + C00001	C04405	C03345;C00001	ECHS1;EHHADH;HADHA
R04224	R04224	4.2.1.17	FALSE	hsa00280	C03460 + C00001 <=> C06000	C03460;C00001	C06000	ECHS1;EHHADH;HADHA
R05064	R05064	3.1.2.4	FALSE	hsa00280	C06000 + C00001 <=> C00010 + C06001	C06000;C00001	C00010;C06001	HIBCH
R05066	R05066	1.1.1.31	FALSE	hsa00280	C06001 + C00003 <=> C06002 + C00004 + C00080	C06001;C00003	C06002;C00004;C00080	HIBADH
R04203	R04203	1.1.1.35	FALSE	hsa00280	C04405 + C00003 <=> C03344 + C00004 + C00080	C04405;C00003	C03344;C00004;C00080	EHHADH;HSD17B10;HADH
R05066.1	R05066	1.1.1.35	FALSE	hsa00280	C06001 + C00003 <=> C06002 + C00004 + C00080	C06001;C00003	C06002;C00004;C00080	EHHADH;HSD17B10;HADH
R04188	R04188	2.6.1.22	FALSE	hsa00280	C03284 + C00026 <=> C06002 + C00025	C03284;C00026	C06002;C00025	ABAT
R02050	R02050	2.6.1.40	FALSE	hsa00280	C01205 + C00022 <=> C00349 + C00041	C01205;C00022	C00349;C00041	AGXT2;AGT2;BAIBA;DAIBAT
R03869	R03869	1.2.1.3	FALSE	hsa00280	C06002 + C00003 + C00001 <=> C02170 + C00004 + C00080	C06002;C00003;C00001	C02170;C00004;C00080	ALDH2;ALDH1B1;ALDH9A1;ALDH3A2;ALDH7A1
R03871	R03871	1.2.3.1	FALSE	hsa00280	C02170 + C00027 <=> C06002 + C00007 + C00001	C02170;C00027	C06002;C00007;C00001	AOX1
R03383	R03383	6.2.1.-	TRUE	hsa00280	C02170 + C00010 + C00002 <=> C01213 + C00020 + C00013	C02170;C00010;C00002	C01213;C00020;C00013	ACSF3
R00833	R00833	5.4.99.2	TRUE	hsa00280	C01213 <=> C00091	C01213	C00091	MUT
Rid	EC	Irreversible	Pathway	Rid.1	C_in	C_out	Gene_symbol
1439	R02197	1.4.3.2	FALSE	hsa00280	C00407 + C00001 + C00007 <=> C00671 + C00014 + C00027	C00407;C00001;C00007	C00671;C00014;C00027	IL4I1
763	R01090	2.6.1.42	TRUE	hsa00280	C00123 + C00026 <=> C00233 + C00025	C00123;C00026	C00233;C00025	BCAT1;BCAT2
855	R01214	2.6.1.42	FALSE	hsa00280	C00183 + C00026 <=> C00141 + C00025	C00183;C00026	C00141;C00025	BCAT1;BCAT2
1441	R02199	2.6.1.42	FALSE	hsa00280	C00407 + C00026 <=> C00671 + C00025	C00407;C00026	C00671;C00025	BCAT1;BCAT2
3517	R07599	1.2.4.4	FALSE	hsa00280	C00141 + C00068 <=> C15976 + C00011	C00141;C00068	C15976;C00011	BCKDHA;BCKDHB
3519	R07600	1.2.4.4	FALSE	hsa00280	C15976 + C15972 <=> C15977 + C00068	C15976;C15972	C15977;C00068	BCKDHA;BCKDHB
3521	R07601	1.2.4.4	FALSE	hsa00280	C00233 + C00068 <=> C15974 + C00011	C00233;C00068	C15974;C00011	BCKDHA;BCKDHB
3523	R07602	1.2.4.4	FALSE	hsa00280	C15974 + C15972 <=> C15975 + C00068	C15974;C15972	C15975;C00068	BCKDHA;BCKDHB
3525	R07603	1.2.4.4	FALSE	hsa00280	C00671 + C00068 <=> C15978 + C00011	C00671;C00068	C15978;C00011	BCKDHA;BCKDHB
3527	R07604	1.2.4.4	FALSE	hsa00280	C15978 + C15972 <=> C15979 + C00068	C15978;C15972	C15979;C00068	BCKDHA;BCKDHB
3535	R07618	1.8.1.4	FALSE	hsa00280	C15973 + C00003 <=> C15972 + C00004 + C00080	C15973;C00003	C15972;C00004;C00080	DLD
1689	R02662	2.3.1.168	TRUE	hsa00280	C00630 + C15973 <=> C00010 + C15977	C00630;C15973	C00010;C15977	DBT
1911	R03174	2.3.1.168	FALSE	hsa00280	C15980 + C15973 <=> C00010 + C15979	C15980;C15973	C00010;C15979	DBT
2265	R04097	2.3.1.168	FALSE	hsa00280	C02939 + C15973 <=> C00010 + C15975	C02939;C15973	C00010;C15975	DBT
1682	R02661	1.3.8.7	NA	hsa00280	C00630 + C00028 <=> C03460 + C00030	C00630;C00028	C03460;C00030	ACADM
1905	R03172	1.3.8.7	NA	hsa00280	C15980 + C00028 <=> C03345 + C00030	C15980;C00028	C03345;C00030	ACADM
2261	R04095	1.3.8.7	NA	hsa00280	C02939 + C00016 <=> C03069 + C01352	C02939;C00016	C03069;C01352	ACADM
1681	R02661	1.3.8.1	NA	hsa00280	C00630 + C00028 <=> C03460 + C00030	C00630;C00028	C03460;C00030	ACADS
1904	R03172	1.3.8.1	NA	hsa00280	C15980 + C00028 <=> C03345 + C00030	C15980;C00028	C03345;C00030	ACADS
1683	R02661	1.3.99.12	FALSE	hsa00280	C00630 + C00028 <=> C03460 + C00030	C00630;C00028	C03460;C00030	ACADSB
1906	R03172	1.3.99.12	FALSE	hsa00280	C15980 + C00028 <=> C03345 + C00030	C15980;C00028	C03345;C00030	ACADSB
2276	R04137	4.2.1.17	FALSE	hsa00280	C05998 <=> C03069 + C00001	C05998	C03069;C00001	ECHS1;EHHADH;HADHA
2304	R04204	4.2.1.17	FALSE	hsa00280	C04405 <=> C03345 + C00001	C04405	C03345;C00001	ECHS1;EHHADH;HADHA
2314	R04224	4.2.1.17	FALSE	hsa00280	C03460 + C00001 <=> C06000	C03460;C00001	C06000	ECHS1;EHHADH;HADHA
2300	R04203	1.1.1.35	FALSE	hsa00280	C04405 + C00003 <=> C03344 + C00004 + C00080	C04405;C00003	C03344;C00004;C00080	EHHADH;HSD17B10;HADH
2785	R05066	1.1.1.35	FALSE	hsa00280	C06001 + C00003 <=> C06002 + C00004 + C00080	C06001;C00003	C06002;C00004;C00080	EHHADH;HSD17B10;HADH
2301	R04203	1.1.1.178	TRUE	hsa00280	C04405 + C00003 <=> C03344 + C00004 + C00080	C04405;C00003	C03344;C00004;C00080	HSD17B10
622	R00927	2.3.1.16	FALSE	hsa00280	C00100 + C00024 <=> C00010 + C03344	C00100;C00024	C00010;C03344	ACAA2;ACAA1;HADHB
1239	R01859	6.4.1.3	TRUE	hsa00280	C00002 + C00100 + C00288 <=> C00008 + C00009 + C00683	C00002;C00100;C00288	C00008;C00009;C00683	PCCA;PCCB
1747	R02765	5.1.99.1	TRUE	hsa00280	C01213 <=> C00683	C01213	C00683	MCEE
560	R00833	5.4.99.2	TRUE	hsa00280	C01213 <=> C00091	C01213	C00091	MUT
Rid	EC	Irreversible	Pathway	Rid.1	C_in	C_out	Gene_symbol
1439	R02197	1.4.3.2	FALSE	hsa00280	C00407 + C00001 + C00007 <=> C00671 + C00014 + C00027	C00407;C00001;C00007	C00671;C00014;C00027	IL4I1
763	R01090	2.6.1.42	TRUE	hsa00280	C00123 + C00026 <=> C00233 + C00025	C00123;C00026	C00233;C00025	BCAT1;BCAT2
855	R01214	2.6.1.42	FALSE	hsa00280	C00183 + C00026 <=> C00141 + C00025	C00183;C00026	C00141;C00025	BCAT1;BCAT2
1441	R02199	2.6.1.42	FALSE	hsa00280	C00407 + C00026 <=> C00671 + C00025	C00407;C00026	C00671;C00025	BCAT1;BCAT2
3517	R07599	1.2.4.4	FALSE	hsa00280	C00141 + C00068 <=> C15976 + C00011	C00141;C00068	C15976;C00011	BCKDHA;BCKDHB
3519	R07600	1.2.4.4	FALSE	hsa00280	C15976 + C15972 <=> C15977 + C00068	C15976;C15972	C15977;C00068	BCKDHA;BCKDHB
3521	R07601	1.2.4.4	FALSE	hsa00280	C00233 + C00068 <=> C15974 + C00011	C00233;C00068	C15974;C00011	BCKDHA;BCKDHB
3523	R07602	1.2.4.4	FALSE	hsa00280	C15974 + C15972 <=> C15975 + C00068	C15974;C15972	C15975;C00068	BCKDHA;BCKDHB
3525	R07603	1.2.4.4	FALSE	hsa00280	C00671 + C00068 <=> C15978 + C00011	C00671;C00068	C15978;C00011	BCKDHA;BCKDHB
3527	R07604	1.2.4.4	FALSE	hsa00280	C15978 + C15972 <=> C15979 + C00068	C15978;C15972	C15979;C00068	BCKDHA;BCKDHB
3535	R07618	1.8.1.4	FALSE	hsa00280	C15973 + C00003 <=> C15972 + C00004 + C00080	C15973;C00003	C15972;C00004;C00080	DLD
1689	R02662	2.3.1.168	TRUE	hsa00280	C00630 + C15973 <=> C00010 + C15977	C00630;C15973	C00010;C15977	DBT
1911	R03174	2.3.1.168	FALSE	hsa00280	C15980 + C15973 <=> C00010 + C15979	C15980;C15973	C00010;C15979	DBT
2265	R04097	2.3.1.168	FALSE	hsa00280	C02939 + C15973 <=> C00010 + C15975	C02939;C15973	C00010;C15975	DBT
1682	R02661	1.3.8.7	NA	hsa00280	C00630 + C00028 <=> C03460 + C00030	C00630;C00028	C03460;C00030	ACADM
1905	R03172	1.3.8.7	NA	hsa00280	C15980 + C00028 <=> C03345 + C00030	C15980;C00028	C03345;C00030	ACADM
2261	R04095	1.3.8.7	NA	hsa00280	C02939 + C00016 <=> C03069 + C01352	C02939;C00016	C03069;C01352	ACADM
1681	R02661	1.3.8.1	NA	hsa00280	C00630 + C00028 <=> C03460 + C00030	C00630;C00028	C03460;C00030	ACADS
1904	R03172	1.3.8.1	NA	hsa00280	C15980 + C00028 <=> C03345 + C00030	C15980;C00028	C03345;C00030	ACADS
1683	R02661	1.3.99.12	FALSE	hsa00280	C00630 + C00028 <=> C03460 + C00030	C00630;C00028	C03460;C00030	ACADSB
1906	R03172	1.3.99.12	FALSE	hsa00280	C15980 + C00028 <=> C03345 + C00030	C15980;C00028	C03345;C00030	ACADSB
2276	R04137	4.2.1.17	FALSE	hsa00280	C05998 <=> C03069 + C00001	C05998	C03069;C00001	ECHS1;EHHADH;HADHA
2304	R04204	4.2.1.17	FALSE	hsa00280	C04405 <=> C03345 + C00001	C04405	C03345;C00001	ECHS1;EHHADH;HADHA
2314	R04224	4.2.1.17	FALSE	hsa00280	C03460 + C00001 <=> C06000	C03460;C00001	C06000	ECHS1;EHHADH;HADHA
2300	R04203	1.1.1.35	FALSE	hsa00280	C04405 + C00003 <=> C03344 + C00004 + C00080	C04405;C00003	C03344;C00004;C00080	EHHADH;HSD17B10;HADH
2785	R05066	1.1.1.35	FALSE	hsa00280	C06001 + C00003 <=> C06002 + C00004 + C00080	C06001;C00003	C06002;C00004;C00080	EHHADH;HSD17B10;HADH
2301	R04203	1.1.1.178	TRUE	hsa00280	C04405 + C00003 <=> C03344 + C00004 + C00080	C04405;C00003	C03344;C00004;C00080	HSD17B10
622	R00927	2.3.1.16	FALSE	hsa00280	C00100 + C00024 <=> C00010 + C03344	C00100;C00024	C00010;C03344	ACAA2;ACAA1;HADHB
Rid	EC	Irreversible	Pathway	Rid.1	C_in	C_out	Gene_symbol
246	R00355	2.6.1.1	TRUE	hsa00250	C00049 + C00026 <=> C00036 + C00025	C00049;C00026	C00036;C00025	GOT1;GOT2
247	R00355	2.6.1.1	TRUE	hsa01100	C00049 + C00026 <=> C00036 + C00025	C00049;C00026	C00036;C00025	GOT1;GOT2
458	R00694	2.6.1.1	FALSE	hsa00360	C00079 + C00026 <=> C00166 + C00025	C00079;C00026	C00166;C00025	GOT1;GOT2
460	R00694	2.6.1.1	FALSE	hsa00400	C00079 + C00026 <=> C00166 + C00025	C00079;C00026	C00166;C00025	GOT1;GOT2
462	R00694	2.6.1.1	FALSE	hsa01100	C00079 + C00026 <=> C00166 + C00025	C00079;C00026	C00166;C00025	GOT1;GOT2
518	R00734	2.6.1.1	FALSE	hsa00350	C00082 + C00026 <=> C01179 + C00025	C00082;C00026	C01179;C00025	GOT1;GOT2
520	R00734	2.6.1.1	FALSE	hsa00400	C00082 + C00026 <=> C01179 + C00025	C00082;C00026	C01179;C00025	GOT1;GOT2
522	R00734	2.6.1.1	FALSE	hsa01100	C00082 + C00026 <=> C01179 + C00025	C00082;C00026	C01179;C00025	GOT1;GOT2
594	R00895	2.6.1.1	FALSE	hsa00270	C00097 + C00026 <=> C00957 + C00025	C00097;C00026	C00957;C00025	GOT1;GOT2
595	R00895	2.6.1.1	FALSE	hsa01100	C00097 + C00026 <=> C00957 + C00025	C00097;C00026	C00957;C00025	GOT1;GOT2
596	R00896	2.6.1.1	FALSE	hsa00270	C00097 + C00026 <=> C00957 + C00302	C00097;C00026	C00957;C00302	GOT1;GOT2
597	R00896	2.6.1.1	FALSE	hsa01100	C00097 + C00026 <=> C00957 + C00302	C00097;C00026	C00957;C00302	GOT1;GOT2
1566	R02433	2.6.1.1	FALSE	hsa00270	C00506 + C00026 <=> C05528 + C00025	C00506;C00026	C05528;C00025	GOT1;GOT2
1669	R02619	2.6.1.1	FALSE	hsa00270	C00606 + C00026 <=> C05527 + C00025	C00606;C00026	C05527;C00025	GOT1;GOT2
1670	R02619	2.6.1.1	FALSE	hsa01100	C00606 + C00026 <=> C05527 + C00025	C00606;C00026	C05527;C00025	GOT1;GOT2
2780	R05052	2.6.1.1	FALSE	hsa00330	C05947 + C00026 <=> C05946 + C00025	C05947;C00026	C05946;C00025	GOT1;GOT2
2781	R05052	2.6.1.1	FALSE	hsa01100	C05947 + C00026 <=> C05946 + C00025	C05947;C00026	C05946;C00025	GOT1;GOT2
459	R00694	2.6.1.5	FALSE	hsa00360	C00079 + C00026 <=> C00166 + C00025	C00079;C00026	C00166;C00025	TAT
461	R00694	2.6.1.5	FALSE	hsa00400	C00079 + C00026 <=> C00166 + C00025	C00079;C00026	C00166;C00025	TAT
463	R00694	2.6.1.5	FALSE	hsa01100	C00079 + C00026 <=> C00166 + C00025	C00079;C00026	C00166;C00025	TAT
517	R00734	2.6.1.5	TRUE	hsa00130	C00082 + C00026 <=> C01179 + C00025	C00082;C00026	C01179;C00025	TAT
519	R00734	2.6.1.5	TRUE	hsa00350	C00082 + C00026 <=> C01179 + C00025	C00082;C00026	C01179;C00025	TAT
521	R00734	2.6.1.5	TRUE	hsa00400	C00082 + C00026 <=> C01179 + C00025	C00082;C00026	C01179;C00025	TAT
523	R00734	2.6.1.5	TRUE	hsa01100	C00082 + C00026 <=> C01179 + C00025	C00082;C00026	C01179;C00025	TAT
3461	R07396	2.6.1.5	FALSE	hsa00270	C01180 + C00025 <=> C00073 + C00026	C01180;C00025	C00073;C00026	TAT
3462	R07396	2.6.1.5	FALSE	hsa01100	C01180 + C00025 <=> C00073 + C00026	C01180;C00025	C00073;C00026	TAT
248	R00357	1.4.3.2	FALSE	hsa00250	C00049 + C00001 + C00007 <=> C00036 + C00014 + C00027	C00049;C00001;C00007	C00036;C00014;C00027	IL4I1
249	R00357	1.4.3.2	FALSE	hsa01100	C00049 + C00001 + C00007 <=> C00036 + C00014 + C00027	C00049;C00001;C00007	C00036;C00014;C00027	IL4I1
432	R00648	1.4.3.2	FALSE	hsa00270	C00073 + C00001 + C00007 <=> C01180 + C00014 + C00027	C00073;C00001;C00007	C01180;C00014;C00027	IL4I1
433	R00648	1.4.3.2	FALSE	hsa01100	C00073 + C00001 + C00007 <=> C01180 + C00014 + C00027	C00073;C00001;C00007	C01180;C00014;C00027	IL4I1
447	R00677	1.4.3.2	FALSE	hsa00380	C00078 + C00001 + C00007 <=> C00331 + C00014 + C00027	C00078;C00001;C00007	C00331;C00014;C00027	IL4I1
448	R00677	1.4.3.2	FALSE	hsa01100	C00078 + C00001 + C00007 <=> C00331 + C00014 + C00027	C00078;C00001;C00007	C00331;C00014;C00027	IL4I1
455	R00689	1.4.3.2	FALSE	hsa00360	C00079 + C00001 + C00007 <=> C00166 + C00014 + C00027	C00079;C00001;C00007	C00166;C00014;C00027	IL4I1
456	R00689	1.4.3.2	FALSE	hsa00400	C00079 + C00001 + C00007 <=> C00166 + C00014 + C00027	C00079;C00001;C00007	C00166;C00014;C00027	IL4I1
457	R00689	1.4.3.2	FALSE	hsa01100	C00079 + C00001 + C00007 <=> C00166 + C00014 + C00027	C00079;C00001;C00007	C00166;C00014;C00027	IL4I1
512	R00729	1.4.3.2	FALSE	hsa00350	C00082 + C00001 + C00007 <=> C01179 + C00014 + C00027	C00082;C00001;C00007	C01179;C00014;C00027	IL4I1
513	R00729	1.4.3.2	FALSE	hsa00400	C00082 + C00001 + C00007 <=> C01179 + C00014 + C00027	C00082;C00001;C00007	C01179;C00014;C00027	IL4I1
514	R00729	1.4.3.2	FALSE	hsa01100	C00082 + C00001 + C00007 <=> C01179 + C00014 + C00027	C00082;C00001;C00007	C01179;C00014;C00027	IL4I1
886	R01259	1.4.3.2	TRUE		C00151 + C00001 + C00007 <=> C00161 + C00014 + C00027	C00151;C00001;C00007	C00161;C00014;C00027	IL4I1
1439	R02197	1.4.3.2	FALSE	hsa00280	C00407 + C00001 + C00007 <=> C00671 + C00014 + C00027	C00407;C00001;C00007	C00671;C00014;C00027	IL4I1
1440	R02197	1.4.3.2	FALSE	hsa01100	C00407 + C00001 + C00007 <=> C00671 + C00014 + C00027	C00407;C00001;C00007	C00671;C00014;C00027	IL4I1
3124	R06124	1.4.3.2	FALSE		C05167 + C00001 + C00007 <=> C00161 + C00014 + C00027	C05167;C00001;C00007	C00161;C00014;C00027	IL4I1
967	R01372	1.13.11.27	FALSE	hsa00360	C00166 + C00007 <=> C05852 + C00011	C00166;C00007	C05852;C00011	HPD
968	R01372	1.13.11.27	FALSE	hsa01100	C00166 + C00007 <=> C05852 + C00011	C00166;C00007	C05852;C00011	HPD
1605	R02521	1.13.11.27	TRUE	hsa00130	C01179 + C00007 <=> C00544 + C00011	C01179;C00007	C00544;C00011	HPD
1606	R02521	1.13.11.27	TRUE	hsa00350	C01179 + C00007 <=> C00544 + C00011	C01179;C00007	C00544;C00011	HPD
1607	R02521	1.13.11.27	TRUE	hsa01100	C01179 + C00007 <=> C00544 + C00011	C01179;C00007	C00544;C00011	HPD
970	R01378	5.3.2.1	TRUE	hsa00360	C00166 <=> C02763	C00166	C02763	MIF
1994	R03342	5.3.2.1	FALSE	hsa00350	C01179 <=> C05350	C01179	C05350	MIF
1603	R02519	1.13.11.5	TRUE	hsa00350	C00544 + C00007 <=> C01036	C00544;C00007	C01036	HGD
1604	R02519	1.13.11.5	TRUE	hsa01100	C00544 + C00007 <=> C01036	C00544;C00007	C01036	HGD
1914	R03181	5.2.1.2	TRUE	hsa00350	C01036 <=> C01061	C01036	C01061	GSTZ1
1915	R03181	5.2.1.2	TRUE	hsa01100	C01036 <=> C01061	C01036	C01061	GSTZ1
2188	R03868	5.2.1.2	FALSE	hsa00350	C02167 <=> C02514	C02167	C02514	GSTZ1
2189	R03868	5.2.1.2	FALSE	hsa01100	C02167 <=> C02514	C02167	C02514	GSTZ1
961	R01364	3.7.1.2	TRUE	hsa00350	C00164 + C00122 <=> C01061 + C00001	C00164;C00122	C01061;C00001	FAH
962	R01364	3.7.1.2	TRUE	hsa01100	C00164 + C00122 <=> C01061 + C00001	C00164;C00122	C01061;C00001	FAH
Rid	EC	Irreversible	Pathway	Rid.1	C_in	C_out	Gene_symbol
1759	R02810	1.11.1.8	TRUE		2 C00708 + C00027 + 2 C00080 <=> C01382 + 2 C00001	C00708;C00027;C00080	C01382;C00001	TPO
1923	R03208	1.11.1.8	FALSE	hsa00350	2 C01060 + C00027 <=> C01829 + C02218 + 2 C00001	C01060;C00027	C01829;C02218;C00001	TPO
1924	R03208	1.11.1.8	FALSE	hsa01100	2 C01060 + C00027 <=> C01829 + C02218 + 2 C00001	C01060;C00027	C01829;C02218;C00001	TPO
2073	R03539	1.11.1.8	FALSE	hsa00350	C05590 + C02515 <=> C01382 + C00082	C05590;C02515	C01382;C00082	TPO
2074	R03539	1.11.1.8	FALSE	hsa01100	C05590 + C02515 <=> C01382 + C00082	C05590;C02515	C01382;C00082	TPO
2212	R03953	1.11.1.8	FALSE	hsa00350	C02515 + C01060 + C00027 <=> C02465 + C02218 + 2 C00001	C02515;C01060;C00027	C02465;C02218;C00001	TPO
2213	R03953	1.11.1.8	FALSE	hsa01100	C02515 + C01060 + C00027 <=> C02465 + C02218 + 2 C00001	C02515;C01060;C00027	C02465;C02218;C00001	TPO
2216	R03973	1.11.1.8	FALSE	hsa00350	C05590 + C01060 <=> C02515 + C01382	C05590;C01060	C02515;C01382	TPO
2217	R03973	1.11.1.8	FALSE	hsa01100	C05590 + C01060 <=> C02515 + C01382	C05590;C01060	C02515;C01382	TPO
3798	R08520	1.11.1.8	FALSE		C16733 + C01382 <=> C16732 + C05590	C16733;C01382	C16732;C05590	TPO
3799	R08521	1.11.1.8	FALSE		C16732 + C01382 <=> C16731 + C05590	C16732;C01382	C16731;C05590	TPO
3800	R08522	1.11.1.8	FALSE		C16731 + C16732 + C00027 <=> C16730 + C16734 + 2 C00001	C16731;C16732;C00027	C16730;C16734;C00001	TPO
3801	R08523	1.11.1.8	FALSE		2 C16731 + C00027 <=> C16729 + C16734 + 2 C00001	C16731;C00027	C16729;C16734;C00001	TPO
453	R00685	4.1.1.28	FALSE	hsa00380	C00078 <=> C00398 + C00011	C00078	C00398;C00011	DDC
454	R00685	4.1.1.28	FALSE	hsa01100	C00078 <=> C00398 + C00011	C00078	C00398;C00011	DDC
465	R00699	4.1.1.28	FALSE	hsa00360	C00079 <=> C05332 + C00011	C00079	C05332;C00011	DDC
524	R00736	4.1.1.28	FALSE	hsa00350	C00082 <=> C00483 + C00011	C00082	C00483;C00011	DDC
821	R01167	4.1.1.28	FALSE	hsa00340	C00135 <=> C00388 + C00011	C00135	C00388;C00011	DDC
823	R01167	4.1.1.28	FALSE	hsa01100	C00135 <=> C00388 + C00011	C00135	C00388;C00011	DDC
1364	R02080	4.1.1.28	TRUE	hsa00350	C00355 <=> C03758 + C00011	C00355	C03758;C00011	DDC
1365	R02080	4.1.1.28	TRUE	hsa01100	C00355 <=> C03758 + C00011	C00355	C03758;C00011	DDC
1707	R02701	4.1.1.28	TRUE	hsa00380	C00643 <=> C00780 + C00011	C00643	C00780;C00011	DDC
1708	R02701	4.1.1.28	TRUE	hsa01100	C00643 <=> C00780 + C00011	C00643	C00780;C00011	DDC
2709	R04909	4.1.1.28	FALSE	hsa00380	C05638 + C00011 <=> C05651	C05638;C00011	C05651	DDC
1232	R01853	1.4.3.4	TRUE		C00375 + C00001 + C00007 <=> C00071 + C00014 + C00027	C00375;C00001;C00007	C00071;C00014;C00027	MAOA;MAOB
1431	R02173	1.4.3.4	FALSE	hsa00380	C00398 + C00001 + C00007 <=> C00637 + C00014 + C00027	C00398;C00001;C00007	C00637;C00014;C00027	MAOA;MAOB
1552	R02382	1.4.3.4	FALSE	hsa00350	C00483 + C00001 + C00007 <=> C03765 + C00014 + C00027	C00483;C00001;C00007	C03765;C00014;C00027	MAOA;MAOB
1609	R02529	1.4.3.4	FALSE	hsa00260	C01888 + C00001 + C00007 <=> C00546 + C00014 + C00027	C01888;C00001;C00007	C00546;C00014;C00027	MAOA;MAOB
1613	R02532	1.4.3.4	FALSE	hsa00350	C00547 + C00001 + C00007 <=> C05577 + C00014 + C00027	C00547;C00001;C00007	C05577;C00014;C00027	MAOA;MAOB
1614	R02532	1.4.3.4	FALSE	hsa01100	C00547 + C00001 + C00007 <=> C05577 + C00014 + C00027	C00547;C00001;C00007	C05577;C00014;C00027	MAOA;MAOB
1666	R02613	1.4.3.4	FALSE	hsa00360	C05332 + C00007 + C00001 <=> C00601 + C00014 + C00027	C05332;C00007;C00001	C00601;C00014;C00027	MAOA;MAOB
1810	R02908	1.4.3.4	FALSE	hsa00380	C00780 + C00001 + C00007 <=> C05634 + C00014 + C00027	C00780;C00001;C00007	C05634;C00014;C00027	MAOA;MAOB
1811	R02908	1.4.3.4	FALSE	hsa01100	C00780 + C00001 + C00007 <=> C05634 + C00014 + C00027	C00780;C00001;C00007	C05634;C00014;C00027	MAOA;MAOB
1819	R02919	1.4.3.4	FALSE	hsa00350	C00788 + C00001 + C00007 <=> C05577 + C00218 + C00027	C00788;C00001;C00007	C05577;C00218;C00027	MAOA;MAOB
1820	R02919	1.4.3.4	FALSE	hsa01100	C00788 + C00001 + C00007 <=> C05577 + C00218 + C00027	C00788;C00001;C00007	C05577;C00218;C00027	MAOA;MAOB
2245	R04025	1.4.3.4	FALSE	hsa00330	C02714 + C00001 + C00007 <=> C05936 + C00014 + C00027	C02714;C00001;C00007	C05936;C00014;C00027	MAOA;MAOB
2246	R04025	1.4.3.4	FALSE	hsa01100	C02714 + C00001 + C00007 <=> C05936 + C00014 + C00027	C02714;C00001;C00007	C05936;C00014;C00027	MAOA;MAOB
2338	R04300	1.4.3.4	FALSE	hsa00350	C03758 + C00001 + C00007 <=> C04043 + C00014 + C00027	C03758;C00001;C00007	C04043;C00014;C00027	MAOA;MAOB
2340	R04300	1.4.3.4	FALSE	hsa01100	C03758 + C00001 + C00007 <=> C04043 + C00014 + C00027	C03758;C00001;C00007	C04043;C00014;C00027	MAOA;MAOB
2496	R04674	1.4.3.4	FALSE	hsa00340	C05127 + C00001 + C00007 <=> C05827 + C00014 + C00027	C05127;C00001;C00007	C05827;C00014;C00027	MAOA;MAOB
2692	R04890	1.4.3.4	FALSE	hsa00350	C05587 + C00001 + C00007 <=> C05581 + C00027 + C00014	C05587;C00001;C00007	C05581;C00027;C00014	MAOA;MAOB
2693	R04890	1.4.3.4	FALSE	hsa01100	C05587 + C00001 + C00007 <=> C05581 + C00027 + C00014	C05587;C00001;C00007	C05581;C00027;C00014	MAOA;MAOB
2698	R04893	1.4.3.4	FALSE	hsa00350	C05589 + C00001 + C00007 <=> C05583 + C00014 + C00027	C05589;C00001;C00007	C05583;C00014;C00027	MAOA;MAOB
2699	R04893	1.4.3.4	FALSE	hsa01100	C05589 + C00001 + C00007 <=> C05583 + C00014 + C00027	C05589;C00001;C00007	C05583;C00014;C00027	MAOA;MAOB
2700	R04894	1.4.3.4	FALSE	hsa00350	C05588 + C00001 + C00007 <=> C05583 + C00027 + C00218	C05588;C00001;C00007	C05583;C00027;C00218	MAOA;MAOB
2701	R04894	1.4.3.4	FALSE	hsa01100	C05588 + C00001 + C00007 <=> C05583 + C00027 + C00218	C05588;C00001;C00007	C05583;C00027;C00218	MAOA;MAOB
2707	R04907	1.4.3.4	FALSE	hsa00380	C05636 + C00007 <=> C05637 + C00014 + C00027	C05636;C00007	C05637;C00014;C00027	MAOA;MAOB
2708	R04908	1.4.3.4	NA	hsa00380	C05638 + C00001 + C00007 <=> C05639 + C00014 + C00027 + C00001	C05638;C00001;C00007	C05639;C00014;C00027;C00001	MAOA;MAOB
3132	R06133	1.4.3.4	FALSE		C00706 + C00001 + C00007 <=> C00071 + C00014 + C00027	C00706;C00001;C00007	C00071;C00014;C00027	MAOA;MAOB
3757	R08346	1.4.3.4	FALSE	hsa00982	C07572 + C00007 + C00001 <=> C16612 + C00543 + C00027	C07572;C00007;C00001	C16612;C00543;C00027	MAOA;MAOB
3758	R08347	1.4.3.4	FALSE	hsa00982	C16608 + C00007 + C00001 <=> C16612 + C00218 + C00027	C16608;C00007;C00001	C16612;C00218;C00027	MAOA;MAOB
3759	R08348	1.4.3.4	FALSE	hsa00982	C16609 + C00001 + C00007 <=> C16612 + C00014 + C00027	C16609;C00001;C00007	C16612;C00014;C00027	MAOA;MAOB
1233	R01853	1.4.3.21	TRUE		C00375 + C00001 + C00007 <=> C00071 + C00014 + C00027	C00375;C00001;C00007	C00071;C00014;C00027	AOC2;AOC3
1553	R02382	1.4.3.21	FALSE	hsa00350	C00483 + C00001 + C00007 <=> C03765 + C00014 + C00027	C00483;C00001;C00007	C03765;C00014;C00027	AOC2;AOC3
1610	R02529	1.4.3.21	FALSE	hsa00260	C01888 + C00001 + C00007 <=> C00546 + C00014 + C00027	C01888;C00001;C00007	C00546;C00014;C00027	AOC2;AOC3
1667	R02613	1.4.3.21	FALSE	hsa00360	C05332 + C00007 + C00001 <=> C00601 + C00014 + C00027	C05332;C00007;C00001	C00601;C00014;C00027	AOC2;AOC3
1892	R03139	1.4.3.21	FALSE	hsa00410	C00986 + C00007 + C00001 <=> C05665 + C00014 + C00027	C00986;C00007;C00001	C05665;C00014;C00027	AOC2;AOC3
2247	R04027	1.4.3.21	FALSE	hsa01100	C02723 + C00007 + C00080 <=> C06178 + C00027 + C00014	C02723;C00007;C00080	C06178;C00027;C00014	AOC2;AOC3
2339	R04300	1.4.3.21	FALSE	hsa00350	C03758 + C00001 + C00007 <=> C04043 + C00014 + C00027	C03758;C00001;C00007	C04043;C00014;C00027	AOC2;AOC3
2341	R04300	1.4.3.21	FALSE	hsa01100	C03758 + C00001 + C00007 <=> C04043 + C00014 + C00027	C03758;C00001;C00007	C04043;C00014;C00027	AOC2;AOC3
2831	R05334	1.4.3.21	FALSE		C02723 + C00007 + C00001 <=> C10974 + C00027 + C00014	C02723;C00007;C00001	C10974;C00027;C00014	AOC2;AOC3
3145	R06154	1.4.3.21	FALSE		C00218 + C00007 + C00001 <=> C00067 + C00014 + C00027	C00218;C00007;C00001	C00067;C00014;C00027	AOC2;AOC3
3239	R06740	1.4.3.21	FALSE	hsa01100	C01672 + C00001 + C00007 <=> C12455 + C00014 + C00027	C01672;C00001;C00007	C12455;C00014;C00027	AOC2;AOC3
363	R00538	1.2.1.5	TRUE		C00071 + C00003 + C00001 <=> C00060 + C00004 + C00080	C00071;C00003;C00001	C00060;C00004;C00080	ALDH3A1;ALDH1A3;ALDH3B1;ALDH3B2
430	R00634	1.2.1.5	TRUE		C00071 + C00006 + C00001 <=> C00060 + C00005 + C00080	C00071;C00006;C00001	C00060;C00005;C00080	ALDH3A1;ALDH1A3;ALDH3B1;ALDH3B2
490	R00710	1.2.1.5	FALSE	hsa00010	C00084 + C00003 + C00001 <=> C00033 + C00004 + C00080	C00084;C00003;C00001	C00033;C00004;C00080	ALDH3A1;ALDH1A3;ALDH3B1;ALDH3B2
493	R00710	1.2.1.5	FALSE	hsa01100	C00084 + C00003 + C00001 <=> C00033 + C00004 + C00080	C00084;C00003;C00001	C00033;C00004;C00080	ALDH3A1;ALDH1A3;ALDH3B1;ALDH3B2
494	R00711	1.2.1.5	FALSE	hsa00010	C00084 + C00006 + C00001 <=> C00033 + C00005 + C00080	C00084;C00006;C00001	C00033;C00005;C00080	ALDH3A1;ALDH1A3;ALDH3B1;ALDH3B2
495	R00711	1.2.1.5	FALSE	hsa01100	C00084 + C00006 + C00001 <=> C00033 + C00005 + C00080	C00084;C00006;C00001	C00033;C00005;C00080	ALDH3A1;ALDH1A3;ALDH3B1;ALDH3B2
603	R00904	1.2.1.5	FALSE	hsa00410	C05665 + C00003 + C00001 <=> C00099 + C00004 + C00080	C05665;C00003;C00001	C00099;C00004;C00080	ALDH3A1;ALDH1A3;ALDH3B1;ALDH3B2
1621	R02536	1.2.1.5	FALSE	hsa00360	C00601 + C00003 + C00001 <=> C07086 + C00004 + C00080	C00601;C00003;C00001	C07086;C00004;C00080	ALDH3A1;ALDH1A3;ALDH3B1;ALDH3B2
1622	R02536	1.2.1.5	FALSE	hsa01100	C00601 + C00003 + C00001 <=> C07086 + C00004 + C00080	C00601;C00003;C00001	C07086;C00004;C00080	ALDH3A1;ALDH1A3;ALDH3B1;ALDH3B2
1623	R02537	1.2.1.5	FALSE	hsa00360	C00601 + C00006 + C00001 <=> C07086 + C00005 + C00080	C00601;C00006;C00001	C07086;C00005;C00080	ALDH3A1;ALDH1A3;ALDH3B1;ALDH3B2
1624	R02537	1.2.1.5	FALSE	hsa01100	C00601 + C00006 + C00001 <=> C07086 + C00005 + C00080	C00601;C00006;C00001	C07086;C00005;C00080	ALDH3A1;ALDH1A3;ALDH3B1;ALDH3B2
1705	R02695	1.2.1.5	FALSE	hsa00350	C03765 + C00003 + C00001 <=> C00642 + C00004 + C00080	C03765;C00003;C00001	C00642;C00004;C00080	ALDH3A1;ALDH1A3;ALDH3B1;ALDH3B2
1706	R02697	1.2.1.5	FALSE	hsa00350	C03765 + C00006 + C00001 <=> C00642 + C00005 + C00080	C03765;C00006;C00001	C00642;C00005;C00080	ALDH3A1;ALDH1A3;ALDH3B1;ALDH3B2
1970	R03300	1.2.1.5	FALSE	hsa00350	C04043 + C00003 + C00001 <=> C01161 + C00004 + C00080	C04043;C00003;C00001	C01161;C00004;C00080	ALDH3A1;ALDH1A3;ALDH3B1;ALDH3B2
1971	R03300	1.2.1.5	FALSE	hsa01100	C04043 + C00003 + C00001 <=> C01161 + C00004 + C00080	C04043;C00003;C00001	C01161;C00004;C00080	ALDH3A1;ALDH1A3;ALDH3B1;ALDH3B2
1972	R03302	1.2.1.5	FALSE	hsa00350	C04043 + C00006 + C00001 <=> C01161 + C00005 + C00080	C04043;C00006;C00001	C01161;C00005;C00080	ALDH3A1;ALDH1A3;ALDH3B1;ALDH3B2
1973	R03302	1.2.1.5	FALSE	hsa01100	C04043 + C00006 + C00001 <=> C01161 + C00005 + C00080	C04043;C00006;C00001	C01161;C00005;C00080	ALDH3A1;ALDH1A3;ALDH3B1;ALDH3B2
2680	R04882	1.2.1.5	FALSE	hsa00350	C05577 + C00003 + C00001 <=> C05580 + C00004 + C00080	C05577;C00003;C00001	C05580;C00004;C00080	ALDH3A1;ALDH1A3;ALDH3B1;ALDH3B2
2681	R04882	1.2.1.5	FALSE	hsa01100	C05577 + C00003 + C00001 <=> C05580 + C00004 + C00080	C05577;C00003;C00001	C05580;C00004;C00080	ALDH3A1;ALDH1A3;ALDH3B1;ALDH3B2
2682	R04883	1.2.1.5	FALSE	hsa00350	C05577 + C00006 + C00001 <=> C05580 + C00005 + C00080	C05577;C00006;C00001	C05580;C00005;C00080	ALDH3A1;ALDH1A3;ALDH3B1;ALDH3B2
2683	R04883	1.2.1.5	FALSE	hsa01100	C05577 + C00006 + C00001 <=> C05580 + C00005 + C00080	C05577;C00006;C00001	C05580;C00005;C00080	ALDH3A1;ALDH1A3;ALDH3B1;ALDH3B2
2688	R04888	1.2.1.5	FALSE	hsa00350	C05581 + C00003 + C00001 <=> C05582 + C00004 + C00080	C05581;C00003;C00001	C05582;C00004;C00080	ALDH3A1;ALDH1A3;ALDH3B1;ALDH3B2
2689	R04888	1.2.1.5	FALSE	hsa01100	C05581 + C00003 + C00001 <=> C05582 + C00004 + C00080	C05581;C00003;C00001	C05582;C00004;C00080	ALDH3A1;ALDH1A3;ALDH3B1;ALDH3B2
2690	R04889	1.2.1.5	FALSE	hsa00350	C05581 + C00006 + C00001 <=> C05582 + C00005 + C00080	C05581;C00006;C00001	C05582;C00005;C00080	ALDH3A1;ALDH1A3;ALDH3B1;ALDH3B2
2691	R04889	1.2.1.5	FALSE	hsa01100	C05581 + C00006 + C00001 <=> C05582 + C00005 + C00080	C05581;C00006;C00001	C05582;C00005;C00080	ALDH3A1;ALDH1A3;ALDH3B1;ALDH3B2
2694	R04891	1.2.1.5	FALSE	hsa00350	C05583 + C00003 + C00001 <=> C05584 + C00004 + C00080	C05583;C00003;C00001	C05584;C00004;C00080	ALDH3A1;ALDH1A3;ALDH3B1;ALDH3B2
2695	R04891	1.2.1.5	FALSE	hsa01100	C05583 + C00003 + C00001 <=> C05584 + C00004 + C00080	C05583;C00003;C00001	C05584;C00004;C00080	ALDH3A1;ALDH1A3;ALDH3B1;ALDH3B2
2696	R04892	1.2.1.5	FALSE	hsa00350	C05583 + C00006 + C00001 <=> C05584 + C00005 + C00080	C05583;C00006;C00001	C05584;C00005;C00080	ALDH3A1;ALDH1A3;ALDH3B1;ALDH3B2
2697	R04892	1.2.1.5	FALSE	hsa01100	C05583 + C00006 + C00001 <=> C05584 + C00005 + C00080	C05583;C00006;C00001	C05584;C00005;C00080	ALDH3A1;ALDH1A3;ALDH3B1;ALDH3B2
2769	R04996	1.2.1.5	FALSE	hsa00340	C05827 + C00003 + C00001 <=> C05828 + C00004 + C00080	C05827;C00003;C00001	C05828;C00004;C00080	ALDH3A1;ALDH1A3;ALDH3B1;ALDH3B2
3361	R07104	1.2.1.5	FALSE	hsa00980	C06899 + C00003 <=> C11150 + C00004 + C00080	C06899;C00003	C11150;C00004;C00080	ALDH3A1;ALDH1A3;ALDH3B1;ALDH3B2
3725	R08282	1.2.1.5	FALSE	hsa00982	C07645 + C00003 + C00001 <=> C07646 + C00004 + C00080	C07645;C00003;C00001	C07646;C00004;C00080	ALDH3A1;ALDH1A3;ALDH3B1;ALDH3B2
3726	R08283	1.2.1.5	FALSE	hsa00982	C07645 + C00006 + C00001 <=> C07646 + C00005 + C00080	C07645;C00006;C00001	C07646;C00005;C00080	ALDH3A1;ALDH1A3;ALDH3B1;ALDH3B2
3739	R08307	1.2.1.5	FALSE	hsa00982	C16587 + C00003 + C00001 <=> C16591 + C00004 + C00080	C16587;C00003;C00001	C16591;C00004;C00080	ALDH3A1;ALDH1A3;ALDH3B1;ALDH3B2
13	R00031	1.14.18.1	NA	hsa00350	C00007 + 2 C00082 <=> 2 C00355	C00007;C00082	C00355	TYR
14	R00031	1.14.18.1	NA	hsa01100	C00007 + 2 C00082 <=> 2 C00355	C00007;C00082	C00355	TYR
19	R00045	1.14.18.1	NA	hsa00350	C00007 + 2 C00355 <=> 2 C00822 + 2 C00001	C00007;C00355	C00822;C00001	TYR
20	R00045	1.14.18.1	NA	hsa01100	C00007 + 2 C00355 <=> 2 C00822 + 2 C00001	C00007;C00355	C00822;C00001	TYR
23	R00058	1.14.18.1	FALSE		C00007 + 2 C00090 <=> 2 C02351 + 2 C00001	C00007;C00090	C02351;C00001	TYR
515	R00731	1.14.18.1	FALSE	hsa00350	C00082 + C00007 <=> C00355 + C00001	C00082;C00007	C00355;C00001	TYR
516	R00731	1.14.18.1	FALSE	hsa01100	C00082 + C00007 <=> C00355 + C00001	C00082;C00007	C00355;C00001	TYR
1362	R02078	1.14.18.1	NA	hsa00350	C00355 + C00082 + C00007 <=> C00822 + C00355 + C00001	C00355;C00082;C00007	C00822;C00355;C00001	TYR
1363	R02078	1.14.18.1	NA	hsa01100	C00355 + C00082 + C00007 <=> C00822 + C00355 + C00001	C00355;C00082;C00007	C00822;C00355;C00001	TYR
1543	R02363	1.14.18.1	FALSE	hsa00740	2 C00530 + C00007 <=> 2 C00472 + 2 C00001	C00530;C00007	C00472;C00001	TYR
1828	R02950	1.14.18.1	NA		C00811 + C00007 + C01197 <=> C01197 + C00001 + C16828	C00811;C00007;C01197	C01197;C00001;C16828	TYR
2506	R04693	1.14.18.1	FALSE		C05176 + C00007 + C00030 <=> C05202 + C00001 + C00028	C05176;C00007;C00030	C05202;C00001;C00028	TYR
2684	R04884	1.14.18.1	FALSE	hsa00350	2 C05578 + C00007 <=> 2 C05579 + 2 C00001	C05578;C00007	C05579;C00001	TYR
2685	R04884	1.14.18.1	FALSE	hsa01100	2 C05578 + C00007 <=> 2 C05579 + 2 C00001	C05578;C00007	C05579;C00001	TYR
1203	R01815	1.14.16.2	FALSE	hsa00350	C00272 + C00082 + C00007 <=> C00355 + C00268 + C00001	C00272;C00082;C00007	C00355;C00268;C00001	TH
1204	R01815	1.14.16.2	FALSE	hsa01100	C00272 + C00082 + C00007 <=> C00355 + C00268 + C00001	C00272;C00082;C00007	C00355;C00268;C00001	TH
Rid	EC	Irreversible	Pathway	Rid.1	C_in	C_out	Gene_symbol
1184	R01795	1.14.16.1	FALSE	hsa00360	C00272 + C00079 + C00007 <=> C00268 + C00082 + C00001	C00272;C00079;C00007	C00268;C00082;C00001	PAH
1185	R01795	1.14.16.1	FALSE	hsa00400	C00272 + C00079 + C00007 <=> C00268 + C00082 + C00001	C00272;C00079;C00007	C00268;C00082;C00001	PAH
1186	R01795	1.14.16.1	FALSE	hsa01100	C00272 + C00079 + C00007 <=> C00268 + C00082 + C00001	C00272;C00079;C00007	C00268;C00082;C00001	PAH
3390	R07211	1.14.16.1	TRUE		C00079 + C00272 + C00007 <=> C00082 + C15522	C00079;C00272;C00007	C00082;C15522	PAH
Rid	EC	Irreversible	Pathway	Rid.1	C_in	C_out	Gene_symbol
499	R00716	1.5.1.8	TRUE	hsa00310	C00449 + C00006 + C00001 <=> C00047 + C00026 + C00005 + C00080	C00449;C00006;C00001	C00047;C00026;C00005;C00080	AASS
500	R00716	1.5.1.8	TRUE	hsa01100	C00449 + C00006 + C00001 <=> C00047 + C00026 + C00005 + C00080	C00449;C00006;C00001	C00047;C00026;C00005;C00080	AASS
1511	R02313	1.5.1.9	TRUE	hsa00310	C00449 + C00003 + C00001 <=> C00025 + C04076 + C00004 + C00080	C00449;C00003;C00001	C00025;C04076;C00004;C00080	AASS
1512	R02313	1.5.1.9	TRUE	hsa01100	C00449 + C00003 + C00001 <=> C00025 + C04076 + C00004 + C00080	C00449;C00003;C00001	C00025;C04076;C00004;C00080	AASS
2016	R03378	2.7.1.81	TRUE	hsa00310	C00044 + C16741 <=> C00035 + C03366	C00044;C16741	C00035;C03366	HYKK
2017	R03378	2.7.1.81	TRUE	hsa01100	C00044 + C16741 <=> C00035 + C03366	C00044;C16741	C00035;C03366	HYKK
4019	R10270	4.2.3.134	NA	hsa00310	C03366 + C00001 <=> C04076 + C00014 + C00009	C03366;C00001	C04076;C00014;C00009	PHYKPL
4020	R10270	4.2.3.134	NA	hsa01100	C03366 + C00001 <=> C04076 + C00014 + C00009	C03366;C00001	C04076;C00014;C00009	PHYKPL
1879	R03098	1.2.1.31	FALSE	hsa00300	C00956 + C00002 <=> C05560 + C00013	C00956;C00002	C05560;C00013	ALDH7A1
1880	R03098	1.2.1.31	FALSE	hsa01100	C00956 + C00002 <=> C05560 + C00013	C00956;C00002	C05560;C00013	ALDH7A1
1881	R03102	1.2.1.31	TRUE	hsa00310	C04076 + C00003 + C00001 <=> C00956 + C00004 + C00080	C04076;C00003;C00001	C00956;C00004;C00080	ALDH7A1
1882	R03102	1.2.1.31	TRUE	hsa01100	C04076 + C00003 + C00001 <=> C00956 + C00004 + C00080	C04076;C00003;C00001	C00956;C00004;C00080	ALDH7A1
1883	R03103	1.2.1.31	TRUE	hsa00310	C04076 + C00006 + C00001 <=> C00956 + C00005 + C00080	C04076;C00006;C00001	C00956;C00005;C00080	ALDH7A1
1884	R03103	1.2.1.31	TRUE	hsa01100	C04076 + C00006 + C00001 <=> C00956 + C00005 + C00080	C04076;C00006;C00001	C00956;C00005;C00080	ALDH7A1
2384	R04390	1.2.1.31	FALSE	hsa00300	C05535 + C00005 + C00080 <=> C04076 + C11482 + C00006	C05535;C00005;C00080	C04076;C11482;C00006	ALDH7A1
2385	R04390	1.2.1.31	FALSE	hsa01100	C05535 + C00005 + C00080 <=> C04076 + C11482 + C00006	C05535;C00005;C00080	C04076;C11482;C00006	ALDH7A1
2672	R04863	1.2.1.31	FALSE	hsa00300	C05560 + C11482 <=> C05535 + C00020	C05560;C11482	C05535;C00020	ALDH7A1
2673	R04863	1.2.1.31	FALSE	hsa01100	C05560 + C11482 <=> C05535 + C00020	C05560;C11482	C05535;C00020	ALDH7A1
1283	R01939	2.6.1.39	TRUE	hsa00300	C00956 + C00026 <=> C00322 + C00025	C00956;C00026	C00322;C00025	AADAT
1284	R01939	2.6.1.39	TRUE	hsa00310	C00956 + C00026 <=> C00322 + C00025	C00956;C00026	C00322;C00025	AADAT
1285	R01939	2.6.1.39	TRUE	hsa01100	C00956 + C00026 <=> C00322 + C00025	C00956;C00026	C00322;C00025	AADAT
120	R00209	1.8.1.4	FALSE	hsa01100	C00022 + C00010 + C00003 <=> C00024 + C00011 + C00004 + C00080	C00022;C00010;C00003	C00024;C00011;C00004;C00080	DLD
1125	R01698	1.8.1.4	FALSE		C00579 + C00003 <=> C00248 + C00004 + C00080	C00579;C00003	C00248;C00004;C00080	DLD
2159	R03815	1.8.1.4	FALSE	hsa00260	C02972 + C00003 <=> C02051 + C00004 + C00080	C02972;C00003	C02051;C00004;C00080	DLD
3533	R07618	1.8.1.4	FALSE	hsa00010	C15973 + C00003 <=> C15972 + C00004 + C00080	C15973;C00003	C15972;C00004;C00080	DLD
3534	R07618	1.8.1.4	FALSE	hsa00020	C15973 + C00003 <=> C15972 + C00004 + C00080	C15973;C00003	C15972;C00004;C00080	DLD
3535	R07618	1.8.1.4	FALSE	hsa00280	C15973 + C00003 <=> C15972 + C00004 + C00080	C15973;C00003	C15972;C00004;C00080	DLD
3536	R07618	1.8.1.4	FALSE	hsa00620	C15973 + C00003 <=> C15972 + C00004 + C00080	C15973;C00003	C15972;C00004;C00080	DLD
3537	R07618	1.8.1.4	FALSE	hsa01100	C15973 + C00003 <=> C15972 + C00004 + C00080	C15973;C00003	C15972;C00004;C00080	DLD
3806	R08549	1.8.1.4	FALSE	hsa01100	C00026 + C00010 + C00003 <=> C00091 + C00011 + C00004 + C00080	C00026;C00010;C00003	C00091;C00011;C00004;C00080	DLD
3808	R08550	1.8.1.4	TRUE		C16832 + C00003 <=> C16237 + C00004 + C00080	C16832;C00003	C16237;C00004;C00080	DLD
4082	R08550	1.8.1.4	TRUE	hsa00310	C16832 + C00003 <=> C16237 + C00004 + C00080	C16832;C00003	C16237;C00004;C00080	DLD;DLDD;DLDH;E3;GCSL;LAD;PHE3
4083	R03815	1.8.1.4	TRUE	hsa00310	C02972 + C00003 <=> C02051 + C00004 + C00080	C02972;C00003	C02051;C00004;C00080	DLD;DLDD;DLDH;E3;GCSL;LAD;PHE3
4084	R07618	1.8.1.4	TRUE	hsa00310	C15973 + C00003 <=> C15972 + C00004 + C00080	C15973;C00003	C15972;C00004;C00080	DLD;DLDD;DLDH;E3;GCSL;LAD;PHE3
4085	R00209	1.8.1.4	TRUE	hsa00310	C00022 + C00010 + C00003 <=> C00024 + C00011 + C00004 + C00080	C00022;C00010;C00003	C00024;C00011;C00004;C00080	DLD;DLDD;DLDH;E3;GCSL;LAD;PHE3
4086	R01221	1.8.1.4	TRUE	hsa00310	C00037 + C00101 + C00003 <=> C00143 + C00014 + C00011 + C00004 + C00080	C00037;C00101;C00003	C00143;C00014;C00011;C00004;C00080	DLD;DLDD;DLDH;E3;GCSL;LAD;PHE3
4087	R01698	1.8.1.4	TRUE	hsa00310	C00579 + C00003 <=> C00248 + C00004 + C00080	C00579;C00003	C00248;C00004;C00080	DLD;DLDD;DLDH;E3;GCSL;LAD;PHE3
4088	R01933	1.8.1.4	TRUE	hsa00310	C00322 + C00010 + C00003 <=> C00527 + C00011 + C00004 + C00080	C00322;C00010;C00003	C00527;C00011;C00004;C00080	DLD;DLDD;DLDH;E3;GCSL;LAD;PHE3
4089	R08549	1.8.1.4	TRUE	hsa00310	C00026 + C00010 + C00003 <=> C00091 + C00011 + C00004 + C00080	C00026;C00010;C00003	C00091;C00011;C00004;C00080	DLD;DLDD;DLDH;E3;GCSL;LAD;PHE3
1586	R02487	1.3.8.6	NA	hsa00071	C00527 + C00016 <=> C01352 + C00877 + C00011	C00527;C00016	C01352;C00877;C00011	GCDH
1587	R02488	1.3.8.6	NA	hsa00310	C00527 + C04253 <=> C00877 + C04570 + C00011	C00527;C04253	C00877;C04570;C00011	GCDH
1588	R02488	1.3.8.6	NA	hsa00380	C00527 + C04253 <=> C00877 + C04570 + C00011	C00527;C04253	C00877;C04570;C00011	GCDH
1589	R02488	1.3.8.6	NA	hsa01100	C00527 + C04253 <=> C00877 + C04570 + C00011	C00527;C04253	C00877;C04570;C00011	GCDH
4002	R10074	1.3.8.6	NA		C00527 + C04253 <=> C02411 + C04570	C00527;C04253	C02411;C04570	GCDH
1699	R02685	4.2.1.17	TRUE	hsa00062	C00640 <=> C00658 + C00001	C00640	C00658;C00001	ECHS1;HADHA
1850	R03026	4.2.1.17	FALSE	hsa00071	C01144 <=> C00877 + C00001	C01144	C00877;C00001	ECHS1;EHHADH;HADHA
1851	R03026	4.2.1.17	FALSE	hsa00310	C01144 <=> C00877 + C00001	C01144	C00877;C00001	ECHS1;EHHADH;HADHA
1852	R03026	4.2.1.17	FALSE	hsa00380	C01144 <=> C00877 + C00001	C01144	C00877;C00001	ECHS1;EHHADH;HADHA
1853	R03026	4.2.1.17	FALSE	hsa00650	C01144 <=> C00877 + C00001	C01144	C00877;C00001	ECHS1;EHHADH;HADHA
1854	R03026	4.2.1.17	FALSE	hsa01100	C01144 <=> C00877 + C00001	C01144	C00877;C00001	ECHS1;EHHADH;HADHA
1861	R03045	4.2.1.17	FALSE	hsa00410	C05668 <=> C00894 + C00001	C05668	C00894;C00001	ECHS1;EHHADH;HADHA
1862	R03045	4.2.1.17	FALSE	hsa00640	C05668 <=> C00894 + C00001	C05668	C00894;C00001	ECHS1;EHHADH;HADHA
[truncated: 1,546 more rows]

## Sheet: Gene_List
Rid	Gene_symbol
1080	GALM
4033	GALM
4034	GALM
213	HK1;HK2;HK3;HKDC1
505	HK1;HK2;HK3;HKDC1
534	HK1;HK2;HK3;HKDC1
576	HK1;HK2;HK3;HKDC1
577	HK1;HK2;HK3;HKDC1
581	HK1;HK2;HK3;HKDC1
804	HK1;HK2;HK3;HKDC1
805	HK1;HK2;HK3;HKDC1
932	HK1;HK2;HK3;HKDC1
933	HK1;HK2;HK3;HKDC1
934	HK1;HK2;HK3;HKDC1
935	HK1;HK2;HK3;HKDC1
937	HK1;HK2;HK3;HKDC1
1078	HK1;HK2;HK3;HKDC1
1158	HK1;HK2;HK3;HKDC1
1160	HK1;HK2;HK3;HKDC1
1162	HK1;HK2;HK3;HKDC1
1164	HK1;HK2;HK3;HKDC1
1166	HK1;HK2;HK3;HKDC1
1301	HK1;HK2;HK3;HKDC1
1303	HK1;HK2;HK3;HKDC1
1304	HK1;HK2;HK3;HKDC1
1779	HK1;HK2;HK3;HKDC1
1780	HK1;HK2;HK3;HKDC1
1781	HK1;HK2;HK3;HKDC1
1783	HK1;HK2;HK3;HKDC1
1784	HK1;HK2;HK3;HKDC1
1785	HK1;HK2;HK3;HKDC1
2202	HK1;HK2;HK3;HKDC1
2203	HK1;HK2;HK3;HKDC1
214	GCK
1079	GCK
1159	GCK
1161	GCK
1163	GCK
1165	GCK
1167	GCK
2899	ADPGK
3898	ADPGK
3899	ADPGK
3900	ADPGK
215	G6PC;G6PC2
1170	G6PC;G6PC2;G6PC3
1171	G6PC;G6PC2;G6PC3
1172	G6PC;G6PC2;G6PC3
1173	G6PC;G6PC2;G6PC3
Gene_symbol
544	GPI
1726	GPI
1727	GPI
1728	GPI
1729	GPI
1730	GPI
1731	GPI
1732	GPI
1733	GPI
1982	GPI
1983	GPI
535	FBP1;FBP2
1231	FBP1;FBP2
2607	FBP1;FBP2
2608	FBP1;FBP2
2609	FBP1;FBP2
2610	FBP1;FBP2
538	PFKL;PFKM;PFKP
542	PFKL;PFKM;PFKP
543	PFKL;PFKM;PFKP
1230	PFKL;PFKM;PFKP
1932	PFKL;PFKM;PFKP
1933	PFKL;PFKM;PFKP
1934	PFKL;PFKM;PFKP
1935	PFKL;PFKM;PFKP
1936	PFKL;PFKM;PFKP
1937	PFKL;PFKM;PFKP
1938	PFKL;PFKM;PFKP
1939	PFKL;PFKM;PFKP
2603	PFKL;PFKM;PFKP
2604	PFKL;PFKM;PFKP
2605	PFKL;PFKM;PFKP
2606	PFKL;PFKM;PFKP
735	ALDOA;ALDOB;ALDOC
736	ALDOA;ALDOB;ALDOC
737	ALDOA;ALDOB;ALDOC
738	ALDOA;ALDOB;ALDOC
739	ALDOA;ALDOB;ALDOC
1214	ALDOA;ALDOB;ALDOC
1639	ALDOA;ALDOB;ALDOC
1640	ALDOA;ALDOB;ALDOC
704	TPI1
705	TPI1
706	TPI1
707	TPI1
Gene_symbol
731	GAPDH;GAPDHS
732	GAPDH;GAPDHS
1103	BPGM
1027	PGK1;PGK2
1028	PGK1;PGK2
1037	PGAM4;PGAM1;PGAM2;BPGM
1038	PGAM4;PGAM1;PGAM2;BPGM
1039	PGAM4;PGAM1;PGAM2;BPGM
4141	PGAM4;PGAM1;PGAM2;BPGM
4142	COQ2;CL640;COQ10D1;MSA1;PHB;PPT
Gene_symbol
1037	PGAM4;PGAM1;PGAM2;BPGM
1038	PGAM4;PGAM1;PGAM2;BPGM
1039	PGAM4;PGAM1;PGAM2;BPGM
4141	PGAM4;PGAM1;PGAM2;BPGM
4142	COQ2;CL640;COQ10D1;MSA1;PHB;PPT
4037	MINPP1;HIPER1;MINPP2;MIPP
434	ENO1;ENO2;ENO3
435	ENO1;ENO2;ENO3
2306	ENO1;ENO2;ENO3
299	PCK1;PCK2
300	PCK1;PCK2
301	PCK1;PCK2
302	PCK1;PCK2
506	PCK1;PCK2
507	PCK1;PCK2
508	PCK1;PCK2
509	PCK1;PCK2
115	PKLR;PKM
116	PKLR;PKM
117	PKLR;PKM
118	PKLR;PKM
297	PKLR;PKM
298	PKLR;PKM
386	PKLR;PKM
436	PKLR;PKM
504	PKLR;PKM
802	PKLR;PKM
803	PKLR;PKM
1237	PKLR;PKM
1238	PKLR;PKM
1515	PKLR;PKM
1516	PKLR;PKM
Gene_symbol
5	PDHA1;PDHA2;PDHB
6	PDHA1;PDHA2;PDHB
7	PDHA1;PDHA2;PDHB
119	PDHA1;PDHA2;PDHB
1126	PDHA1;PDHA2;PDHB
1953	PDHA1;PDHA2;PDHB
1954	PDHA1;PDHA2;PDHB
1955	PDHA1;PDHA2;PDHB
120	DLD
1125	DLD
2159	DLD
3533	DLD
3534	DLD
3535	DLD
3536	DLD
3537	DLD
3806	DLD
3808	DLD
4082	DLD;DLDD;DLDH;E3;GCSL;LAD;PHE3
4083	DLD;DLDD;DLDH;E3;GCSL;LAD;PHE3
4084	DLD;DLDD;DLDH;E3;GCSL;LAD;PHE3
4085	DLD;DLDD;DLDH;E3;GCSL;LAD;PHE3
4086	DLD;DLDD;DLDH;E3;GCSL;LAD;PHE3
4087	DLD;DLDD;DLDH;E3;GCSL;LAD;PHE3
4088	DLD;DLDD;DLDH;E3;GCSL;LAD;PHE3
4089	DLD;DLDD;DLDH;E3;GCSL;LAD;PHE3
121	DLAT
1641	DLAT
1642	DLAT
1643	DLAT
Gene_symbol
468	LDHAL6A;LDHA;LDHB;LDHC;LDHAL6B
469	LDHAL6A;LDHA;LDHB;LDHC;LDHAL6B
470	LDHAL6A;LDHA;LDHB;LDHC;LDHAL6B
689	LDHAL6A;LDHA;LDHB;LDHC;LDHAL6B
1885	LDHAL6A;LDHA;LDHB;LDHC;LDHAL6B
114	LDHD
Gene_symbol
241	CS
242	CS
243	CS
244	ACLY
245	ACLY
Gene_symbol
928	ACO1;ACO2
929	ACO1;ACO2
930	ACO1;ACO2
931	ACO1;ACO2
1265	ACO1;ACO2
1266	ACO1;ACO2
1267	ACO1;ACO2
185	IDH1;IDH2
186	IDH1;IDH2
187	IDH1;IDH2
188	IDH1;IDH2
1263	IDH1;IDH2
1264	IDH1;IDH2
487	IDH3A;IDH3B;IDH3G
488	IDH3A;IDH3B;IDH3G
Gene_symbol
421	OGDH;OGDHL
1127	OGDH;OGDHL
1282	OGDH;OGDHL
1286	OGDH;OGDHL
1287	OGDH;OGDHL
1980	OGDH;OGDHL
3805	OGDH;OGDHL
1644	DLST
1645	DLST
1646	DLST
1647	DLST
3807	DLST
120	DLD
1125	DLD
2159	DLD
3533	DLD
3534	DLD
3535	DLD
3536	DLD
3537	DLD
3806	DLD
3808	DLD
4082	DLD;DLDD;DLDH;E3;GCSL;LAD;PHE3
4083	DLD;DLDD;DLDH;E3;GCSL;LAD;PHE3
4084	DLD;DLDD;DLDH;E3;GCSL;LAD;PHE3
4085	DLD;DLDD;DLDH;E3;GCSL;LAD;PHE3
4086	DLD;DLDD;DLDH;E3;GCSL;LAD;PHE3
4087	DLD;DLDD;DLDH;E3;GCSL;LAD;PHE3
4088	DLD;DLDD;DLDH;E3;GCSL;LAD;PHE3
4089	DLD;DLDD;DLDH;E3;GCSL;LAD;PHE3
Gene_symbol
303	SUCLG2;SUCLG1;SUCLA2
304	SUCLG2;SUCLG1;SUCLA2
305	SUCLG2;SUCLG1;SUCLA2
510	SUCLG2;SUCLG1;SUCLA2
511	SUCLG2;SUCLG1;SUCLA2
1560	SUCLG2;SUCLG1;SUCLA2
1561	SUCLG2;SUCLG1;SUCLA2
279	SUCLG2;SUCLG1;SUCLA2
280	SUCLG2;SUCLG1;SUCLA2
281	SUCLG2;SUCLG1;SUCLA2
Gene_symbol
1428	SDHA;SDHB
1429	SDHA;SDHB
Gene_symbol
752	FH
753	FH
754	FH
Gene_symbol
233	MDH1;MDH2
234	MDH1;MDH2
235	MDH1;MDH2
236	MDH1;MDH2
3376	MDH1;MDH2
Gene_symbol
237	PC
238	PC
239	PC
Gene_symbol
1029	PHGDH
1030	PHGDH
3669	PHGDH
2292	PSAT1
2293	PSAT1
2789	PSAT1
2790	PSAT1
394	PSPH
395	PSPH
1782	PSPH
Gene_symbol
128	SDS;SDSL
130	SDS;SDSL
402	SDS;SDSL
3130	SDS
3822	SDS
129	SDS;SDSL
131	SDS;SDSL
686	SDS;SDSL
687	SDS;SDSL
688	SDS;SDSL
Gene_symbol
588	CBS
913	CBS
914	CBS
915	CBS
916	CBS
2719	CBS
547	CTH
548	CTH
690	CTH
691	CTH
692	CTH
1562	CTH
2600	CTH
2716	CTH
3819	CTH
3820	CTH
3919	CTH
Gene_symbol
398	AGXT
399	AGXT
400	AGXT
644	SHMT1;SHMT2
645	SHMT1;SHMT2
646	SHMT1;SHMT2
647	SHMT1;SHMT2
648	SHMT1;SHMT2
Gene_symbol
376	GATM
377	GATM
378	GATM
1323	GATM
1324	GATM
1257	GAMT
1258	GAMT
1259	GAMT
Gene_symbol
251	DAO
252	DAO
940	DAO
1567	DAO
1568	DAO
1807	DAO
1823	DAO
2313	DAO
2903	DAO
3125	DAO
254	AGXT;AGXT2
255	AGXT;AGXT2
257	AGXT;AGXT2
258	AGXT;AGXT2
Gene_symbol
713	CHDH
1635	ALDH7A1
1636	ALDH7A1
1637	ALDH7A1
1638	ALDH7A1
1763	BHMT
1764	BHMT
1765	BHMT
1061	DMGDH
1062	DMGDH
409	PIPOX
410	PIPOX
411	SARDH
412	SARDH
Gene_symbol
2034	GLDC
2035	GLDC
557	ALAS1;ALAS2
558	ALAS1;ALAS2
559	ALAS1;ALAS2
256	GCAT
1232	MAOA;MAOB
1431	MAOA;MAOB
1552	MAOA;MAOB
1609	MAOA;MAOB
1613	MAOA;MAOB
1614	MAOA;MAOB
1666	MAOA;MAOB
1810	MAOA;MAOB
1811	MAOA;MAOB
1819	MAOA;MAOB
1820	MAOA;MAOB
2245	MAOA;MAOB
2246	MAOA;MAOB
2338	MAOA;MAOB
2340	MAOA;MAOB
2496	MAOA;MAOB
2692	MAOA;MAOB
2693	MAOA;MAOB
2698	MAOA;MAOB
2699	MAOA;MAOB
2700	MAOA;MAOB
2701	MAOA;MAOB
2707	MAOA;MAOB
2708	MAOA;MAOB
3132	MAOA;MAOB
3757	MAOA;MAOB
3758	MAOA;MAOB
3759	MAOA;MAOB
1233	AOC2;AOC3
1553	AOC2;AOC3
1610	AOC2;AOC3
1667	AOC2;AOC3
1892	AOC2;AOC3
2247	AOC2;AOC3
2339	AOC2;AOC3
2341	AOC2;AOC3
2831	AOC2;AOC3
3145	AOC2;AOC3
3239	AOC2;AOC3
Gene_symbol
337	GSS
338	GSS
Gene_symbol
4038	GGT6
599	ANPEP
601	ANPEP
2723	ANPEP
598	LAP3
600	LAP3
2722	LAP3
592	GCLC
593	GCLC
337	GSS
338	GSS
Gene_symbol
335	GGT6;GGT1;GGT7;GGT5
336	GGT6;GGT1;GGT7;GGT5
888	GGT6;GGT1;GGT7;GGT5
1124	GGT6;GGT1;GGT7;GGT5
2186	GGT6;GGT1;GGT7;GGT5
2187	GGT6;GGT1;GGT7;GGT5
2200	GGT6;GGT1;GGT7;GGT5
2214	GGT6;GGT1;GGT7;GGT5
2215	GGT6;GGT1;GGT7;GGT5
2283	GGT6;GGT1;GGT7;GGT5
2717	GGT6;GGT1;GGT7;GGT5
4039	GGCT;C7orf24;CRF21;GCTG;GGC
164	OPLAH
2066	GSTO2;GSTA5;GSTA1;GSTA2;GSTA3;GSTA4;GSTM1;GSTM2;GSTM3;GSTM4;GSTM5;GSTP1;GSTT1;GSTT2;GSTK1;MGST1;MGST2;MGST3;GSTT2B;GSTO1
3261	GSTO2;GSTA5;GSTA1;GSTA2;GSTA3;GSTA4;GSTM1;GSTM2;GSTM3;GSTM4;GSTM5;GSTP1;GSTT1;GSTT2;GSTK1;MGST1;MGST2;MGST3;GSTT2B;GSTO1
3262	GSTO2;GSTA5;GSTA1;GSTA2;GSTA3;GSTA4;GSTM1;GSTM2;GSTM3;GSTM4;GSTM5;GSTP1;GSTT1;GSTT2;GSTK1;MGST1;MGST2;MGST3;GSTT2B;GSTO1
3263	GSTO2;GSTA5;GSTA1;GSTA2;GSTA3;GSTA4;GSTM1;GSTM2;GSTM3;GSTM4;GSTM5;GSTP1;GSTT1;GSTT2;GSTK1;MGST1;MGST2;MGST3;GSTT2B;GSTO1
3271	GSTO2;GSTA5;GSTA1;GSTA2;GSTA3;GSTA4;GSTM1;GSTM2;GSTM3;GSTM4;GSTM5;GSTP1;GSTT1;GSTT2;GSTK1;MGST1;MGST2;MGST3;GSTT2B;GSTO1
3272	GSTO2;GSTA5;GSTA1;GSTA2;GSTA3;GSTA4;GSTM1;GSTM2;GSTM3;GSTM4;GSTM5;GSTP1;GSTT1;GSTT2;GSTK1;MGST1;MGST2;MGST3;GSTT2B;GSTO1
3273	GSTO2;GSTA5;GSTA1;GSTA2;GSTA3;GSTA4;GSTM1;GSTM2;GSTM3;GSTM4;GSTM5;GSTP1;GSTT1;GSTT2;GSTK1;MGST1;MGST2;MGST3;GSTT2B;GSTO1
3274	GSTO2;GSTA5;GSTA1;GSTA2;GSTA3;GSTA4;GSTM1;GSTM2;GSTM3;GSTM4;GSTM5;GSTP1;GSTT1;GSTT2;GSTK1;MGST1;MGST2;MGST3;GSTT2B;GSTO1
3331	GSTO2;GSTA5;GSTA1;GSTA2;GSTA3;GSTA4;GSTM1;GSTM2;GSTM3;GSTM4;GSTM5;GSTP1;GSTT1;GSTT2;GSTK1;MGST1;MGST2;MGST3;GSTT2B;GSTO1
3332	GSTO2;GSTA5;GSTA1;GSTA2;GSTA3;GSTA4;GSTM1;GSTM2;GSTM3;GSTM4;GSTM5;GSTP1;GSTT1;GSTT2;GSTK1;MGST1;MGST2;MGST3;GSTT2B;GSTO1
3343	GSTO2;GSTA5;GSTA1;GSTA2;GSTA3;GSTA4;GSTM1;GSTM2;GSTM3;GSTM4;GSTM5;GSTP1;GSTT1;GSTT2;GSTK1;MGST1;MGST2;MGST3;GSTT2B;GSTO1
3344	GSTO2;GSTA5;GSTA1;GSTA2;GSTA3;GSTA4;GSTM1;GSTM2;GSTM3;GSTM4;GSTM5;GSTP1;GSTT1;GSTT2;GSTK1;MGST1;MGST2;MGST3;GSTT2B;GSTO1
3352	GSTO2;GSTA5;GSTA1;GSTA2;GSTA3;GSTA4;GSTM1;GSTM2;GSTM3;GSTM4;GSTM5;GSTP1;GSTT1;GSTT2;GSTK1;MGST1;MGST2;MGST3;GSTT2B;GSTO1
3353	GSTO2;GSTA5;GSTA1;GSTA2;GSTA3;GSTA4;GSTM1;GSTM2;GSTM3;GSTM4;GSTM5;GSTP1;GSTT1;GSTT2;GSTK1;MGST1;MGST2;MGST3;GSTT2B;GSTO1
3354	GSTO2;GSTA5;GSTA1;GSTA2;GSTA3;GSTA4;GSTM1;GSTM2;GSTM3;GSTM4;GSTM5;GSTP1;GSTT1;GSTT2;GSTK1;MGST1;MGST2;MGST3;GSTT2B;GSTO1
3355	GSTO2;GSTA5;GSTA1;GSTA2;GSTA3;GSTA4;GSTM1;GSTM2;GSTM3;GSTM4;GSTM5;GSTP1;GSTT1;GSTT2;GSTK1;MGST1;MGST2;MGST3;GSTT2B;GSTO1
3360	GSTO2;GSTA5;GSTA1;GSTA2;GSTA3;GSTA4;GSTM1;GSTM2;GSTM3;GSTM4;GSTM5;GSTP1;GSTT1;GSTT2;GSTK1;MGST1;MGST2;MGST3;GSTT2B;GSTO1
3374	GSTO2;GSTA5;GSTA1;GSTA2;GSTA3;GSTA4;GSTM1;GSTM2;GSTM3;GSTM4;GSTM5;GSTP1;GSTT1;GSTT2;GSTK1;MGST1;MGST2;MGST3;GSTT2B;GSTO1
3375	GSTO2;GSTA5;GSTA1;GSTA2;GSTA3;GSTA4;GSTM1;GSTM2;GSTM3;GSTM4;GSTM5;GSTP1;GSTT1;GSTT2;GSTK1;MGST1;MGST2;MGST3;GSTT2B;GSTO1
3723	GSTO2;GSTA5;GSTA1;GSTA2;GSTA3;GSTA4;GSTM1;GSTM2;GSTM3;GSTM4;GSTM5;GSTP1;GSTT1;GSTT2;GSTK1;MGST1;MGST2;MGST3;GSTT2B;GSTO1
3791	GSTO2;GSTA5;GSTA1;GSTA2;GSTA3;GSTA4;GSTM1;GSTM2;GSTM3;GSTM4;GSTM5;GSTP1;GSTT1;GSTT2;GSTK1;MGST1;MGST2;MGST3;GSTT2B;GSTO1
3792	GSTO2;GSTA5;GSTA1;GSTA2;GSTA3;GSTA4;GSTM1;GSTM2;GSTM3;GSTM4;GSTM5;GSTP1;GSTT1;GSTT2;GSTK1;MGST1;MGST2;MGST3;GSTT2B;GSTO1
3936	GSTO2;GSTA5;GSTA1;GSTA2;GSTA3;GSTA4;GSTM1;GSTM2;GSTM3;GSTM4;GSTM5;GSTP1;GSTT1;GSTT2;GSTK1;MGST1;MGST2;MGST3;GSTT2B;GSTO1
4038	GGT6
Gene_symbol
592	GCLC
593	GCLC
337	GSS
338	GSS
Gene_symbol
128	SDS;SDSL
130	SDS;SDSL
402	SDS;SDSL
3130	SDS
3822	SDS
Gene_symbol
588	CBS
913	CBS
914	CBS
915	CBS
916	CBS
2719	CBS
2068	CCBL2;CCBL1
3920	CCBL2;CCBL1
4040	KYAT3;CCBL2;KAT3;KATIII
4042	KYAT3;CCBL2;KAT3;KATIII
1763	BHMT
1764	BHMT
1765	BHMT
4041	BHMT2
649	MTR
650	MTR
651	MTR
3918	MTR
Gene_symbol
547	CTH
548	CTH
690	CTH
691	CTH
692	CTH
1562	CTH
2600	CTH
2716	CTH
3819	CTH
3820	CTH
3919	CTH
2068	CCBL2;CCBL1
3920	CCBL2;CCBL1
4040	KYAT3;CCBL2;KAT3;KATIII
4042	KYAT3;CCBL2;KAT3;KATIII
246	GOT1;GOT2
247	GOT1;GOT2
458	GOT1;GOT2
460	GOT1;GOT2
462	GOT1;GOT2
518	GOT1;GOT2
520	GOT1;GOT2
522	GOT1;GOT2
594	GOT1;GOT2
595	GOT1;GOT2
596	GOT1;GOT2
597	GOT1;GOT2
1566	GOT1;GOT2
1669	GOT1;GOT2
1670	GOT1;GOT2
2780	GOT1;GOT2
2781	GOT1;GOT2
1886	MPST;TST
1887	MPST;TST
1888	MPST;TST
589	CDO1
590	CDO1
591	CDO1
Gene_symbol
89	MAT2B;MAT1A;MAT2A
90	MAT2B;MAT1A;MAT2A
2601	MAT2B;MAT1A;MAT2A
270	DNMT1;DNMT3A;DNMT3B;DNMT3L
2670	DNMT1;DNMT3A;DNMT3B
2671	DNMT1;DNMT3A;DNMT3B
112	AHCYL1;AHCY;AHCYL2
113	AHCYL1;AHCY;AHCYL2
2718	AHCYL1;AHCY;AHCYL2
588	CBS
913	CBS
914	CBS
915	CBS
916	CBS
2719	CBS
547	CTH
548	CTH
690	CTH
691	CTH
692	CTH
1562	CTH
2600	CTH
2716	CTH
3819	CTH
3820	CTH
3919	CTH
Gene_symbol
89	MAT2B;MAT1A;MAT2A
90	MAT2B;MAT1A;MAT2A
2601	MAT2B;MAT1A;MAT2A
91	AMD1
92	AMD1
93	AMD1
1274	SRM
1275	SRM
1276	SRM
1277	SRM
1786	SRM
1788	SRM
1790	SRM
1792	SRM
1794	SRM
3761	SRM
1787	SMS
1789	SMS
1791	SMS
1793	SMS
1795	SMS
992	MTAP
993	MTAP
2390	MRI1
2391	MRI1
3453	APIP
3454	APIP
3455	ENOPH1
3456	ENOPH1
3457	ENOPH1
3458	ENOPH1
3459	ENOPH1
3460	ENOPH1
3431	ADI1
3432	ADI1
3433	ADI1
3434	ADI1
248	IL4I1
249	IL4I1
432	IL4I1
433	IL4I1
447	IL4I1
448	IL4I1
455	IL4I1
456	IL4I1
457	IL4I1
512	IL4I1
513	IL4I1
514	IL4I1
886	IL4I1
1439	IL4I1
1440	IL4I1
3124	IL4I1
459	TAT
461	TAT
463	TAT
517	TAT
519	TAT
521	TAT
523	TAT
3461	TAT
3462	TAT
Gene_symbol
129	SDS;SDSL
131	SDS;SDSL
686	SDS;SDSL
687	SDS;SDSL
688	SDS;SDSL
1128	BCKDHA;BCKDHB
1129	BCKDHA;BCKDHB
2316	BCKDHA;BCKDHB
3517	BCKDHA;BCKDHB
3518	BCKDHA;BCKDHB
3519	BCKDHA;BCKDHB
3520	BCKDHA;BCKDHB
3521	BCKDHA;BCKDHB
3522	BCKDHA;BCKDHB
3523	BCKDHA;BCKDHB
3524	BCKDHA;BCKDHB
3525	BCKDHA;BCKDHB
3526	BCKDHA;BCKDHB
3527	BCKDHA;BCKDHB
3528	BCKDHA;BCKDHB
4043	BCKDHA;BCKDE1A;MSU;MSUD1;OVD1A
4044	BCKDHA;BCKDE1A;MSU;MSUD1;OVD1A
120	DLD
1125	DLD
2159	DLD
3533	DLD
3534	DLD
3535	DLD
3536	DLD
3537	DLD
3806	DLD
3808	DLD
4082	DLD;DLDD;DLDH;E3;GCSL;LAD;PHE3
4083	DLD;DLDD;DLDH;E3;GCSL;LAD;PHE3
4084	DLD;DLDD;DLDH;E3;GCSL;LAD;PHE3
4085	DLD;DLDD;DLDH;E3;GCSL;LAD;PHE3
4086	DLD;DLDD;DLDH;E3;GCSL;LAD;PHE3
4087	DLD;DLDD;DLDH;E3;GCSL;LAD;PHE3
4088	DLD;DLDD;DLDH;E3;GCSL;LAD;PHE3
4089	DLD;DLDD;DLDH;E3;GCSL;LAD;PHE3
1689	DBT
1690	DBT
1911	DBT
1912	DBT
2265	DBT
2266	DBT
4045	DBT;BCATE2;BCKAD-E2;BCKADE2;BCOADC-E2;E2;E2B
Gene_symbol
535	FBP1;FBP2
1231	FBP1;FBP2
2607	FBP1;FBP2
2608	FBP1;FBP2
2609	FBP1;FBP2
2610	FBP1;FBP2
538	PFKL;PFKM;PFKP
542	PFKL;PFKM;PFKP
543	PFKL;PFKM;PFKP
1230	PFKL;PFKM;PFKP
1932	PFKL;PFKM;PFKP
1933	PFKL;PFKM;PFKP
1934	PFKL;PFKM;PFKP
1935	PFKL;PFKM;PFKP
1936	PFKL;PFKM;PFKP
1937	PFKL;PFKM;PFKP
1938	PFKL;PFKM;PFKP
1939	PFKL;PFKM;PFKP
2603	PFKL;PFKM;PFKP
2604	PFKL;PFKM;PFKP
2605	PFKL;PFKM;PFKP
2606	PFKL;PFKM;PFKP
735	ALDOA;ALDOB;ALDOC
736	ALDOA;ALDOB;ALDOC
737	ALDOA;ALDOB;ALDOC
738	ALDOA;ALDOB;ALDOC
739	ALDOA;ALDOB;ALDOC
1214	ALDOA;ALDOB;ALDOC
1639	ALDOA;ALDOB;ALDOC
1640	ALDOA;ALDOB;ALDOC
544	GPI
1726	GPI
1727	GPI
1728	GPI
1729	GPI
1730	GPI
1731	GPI
1732	GPI
1733	GPI
1982	GPI
1983	GPI
564	G6PD
1723	G6PD
1724	G6PD
1725	G6PD
4046	G6PD;G6PD1
4047	G6PD;G6PD1
1342	PGLS;H6PD
1343	PGLS;H6PD
1042	H6PD
1043	H6PD
1044	PGD
1045	PGD
1046	PGD
4048	PGD;6PGD
734	TKT;TKTL1;TKTL2
1092	TKT;TKTL1;TKTL2
1093	TKT;TKTL1;TKTL2
1215	TKT;TKTL1;TKTL2
1216	TKT;TKTL1;TKTL2
3244	TKT;TKTL1;TKTL2
3245	TKT;TKTL1;TKTL2
1047	RPE;RPEL1
1048	RPE;RPEL1
1049	RPE;RPEL1
725	RPIA
726	RPIA
719	PRPS1L1;PRPS1;PRPS2
720	PRPS1L1;PRPS1;PRPS2
721	PRPS1L1;PRPS1;PRPS2
1212	TALDO1
1213	TALDO1
3812	TALDO1
722	RBKS
1742	RBKS
655	PGM1;PGM2
656	PGM1;PGM2
657	PGM1;PGM2
658	PGM1;PGM2
659	PGM1;PGM2
727	PGM1;PGM2
729	PGM1;PGM2
1981	PGM1;PGM2
728	PGM2
730	PGM2
1741	PGM2
Gene_symbol
1081	FASN
1082	FASN
1085	FASN
1087	FASN
1131	FASN
1133	FASN
2366	FASN
2368	FASN
2427	FASN
2428	FASN
2429	FASN
2430	FASN
2431	FASN
2432	FASN
2433	FASN
2434	FASN
2435	FASN
2436	FASN
2437	FASN
2438	FASN
2439	FASN
2440	FASN
2455	FASN
2456	FASN
2457	FASN
2458	FASN
2509	FASN
2510	FASN
2511	FASN
2513	FASN
2724	FASN
2726	FASN
2728	FASN
2729	FASN
2730	FASN
2731	FASN
2732	FASN
2733	FASN
2734	FASN
2736	FASN
2738	FASN
2739	FASN
2740	FASN
2742	FASN
2744	FASN
2745	FASN
2746	FASN
2748	FASN
2750	FASN
2751	FASN
2752	FASN
2753	FASN
2754	FASN
2755	FASN
2756	FASN
2758	FASN
2760	FASN
2761	FASN
2812	FASN
525	ACACA;ACACB
526	ACACA;ACACB
527	ACACA;ACACB
2381	ACACA;ACACB
2382	ACACA;ACACB
1084	MCAT
1086	MCAT
2367	OXSM
2369	OXSM
2512	OXSM
2514	OXSM
2725	OXSM
2727	OXSM
2735	OXSM
2737	OXSM
2741	OXSM
2743	OXSM
2747	OXSM
2749	OXSM
2757	OXSM
2759	OXSM
3555	OXSM
4007	OXSM
4008	OXSM
4009	OXSM
4010	OXSM
1769	HSD11B2
1770	RDH10;RDH8;RDH16
2166	HSD11B2
2711	RDH10;RDH8;RDH16
2832	RDH10;RDH8;RDH16
3547	RDH10;RDH8;RDH16
3767	RDH10;RDH8;RDH16
3768	RDH10;RDH8;RDH16
3769	RDH10;RDH8;RDH16
3771	RDH10;RDH8;RDH16
3903	RDH10;RDH8;RDH16
3904	RDH10;RDH8;RDH16
4031	RDH10;RDH8;RDH16
4032	RDH10;RDH8;RDH16
1218	HSD17B2;HSD17B8;HSD17B6
1219	HSD17B2;HSD17B8;HSD17B6
4049	HSD17B8;D6S2245E;FABG;FABGL;H2-KE6;HKE6;KE6;RING2;SDR30C1;dJ1033B10.9
1532	HSD17B1;HSD17B2;HSD17B12;HSD17B7;HSD17B8;HSD17B6
1533	HSD17B1;HSD17B2;HSD17B12;HSD17B7;HSD17B8;HSD17B6
1534	HSD17B1;HSD17B2;HSD17B12;HSD17B7;HSD17B8;HSD17B6
1535	HSD17B1;HSD17B2;HSD17B12;HSD17B7;HSD17B8;HSD17B6
2501	HSD17B1;HSD17B2;HSD17B12;HSD17B7;HSD17B8;HSD17B6
2502	HSD17B1;HSD17B2;HSD17B12;HSD17B7;HSD17B8;HSD17B6
2503	HSD17B1;HSD17B2;HSD17B12;HSD17B7;HSD17B8;HSD17B6
2504	HSD17B1;HSD17B2;HSD17B12;HSD17B7;HSD17B8;HSD17B6
3872	HSD17B1;HSD17B2;HSD17B12;HSD17B7;HSD17B8;HSD17B6
3887	HSD17B1;HSD17B2;HSD17B12;HSD17B7;HSD17B8;HSD17B6
4050	HSD17B8;D6S2245E;FABG;FABGL;H2-KE6;HKE6;KE6;RING2;SDR30C1;dJ1033B10.9
898	MECR
899	MECR;PECR
2139	MECR
2140	MECR;PECR
2172	MECR
2173	MECR;PECR
2224	MECR
2225	MECR;PECR
2583	MECR
2584	MECR;PECR
3255	MECR
3256	MECR;PECR
3380	MECR
3553	PECR
3554	MECR;PECR
4095	MECR;CGI-63;DYTOABG;ETR1;FASN2B;NRBF1
4096	MECR;CGI-63;DYTOABG;ETR1;FASN2B;NRBF1
4097	MECR;CGI-63;DYTOABG;ETR1;FASN2B;NRBF1
4098	MECR;CGI-63;DYTOABG;ETR1;FASN2B;NRBF1
4099	MECR;CGI-63;DYTOABG;ETR1;FASN2B;NRBF1
4100	MECR;CGI-63;DYTOABG;ETR1;FASN2B;NRBF1
4101	MECR;CGI-63;DYTOABG;ETR1;FASN2B;NRBF1
4104	OLAH;AURA1;SAST;TE2;THEDC1
4105	OLAH;AURA1;SAST;TE2;THEDC1
4106	OLAH;AURA1;SAST;TE2;THEDC1
4107	OLAH;AURA1;SAST;TE2;THEDC1
274	SLC27A2;ACSL1;ACSL3;ACSL4;ACSBG1;ACSL6;ACSL5;ACSBG2
908	ACSL1;ACSL3;ACSL4;ACSBG1;ACSL6;ACSL5;ACSBG2
909	ACSL1;ACSL3;ACSL4;ACSBG1;ACSL6;ACSL5;ACSBG2
4102	ACSL1;ACS1;FACL1;FACL2;LACS;LACS1;LACS2
4103	ACSL1;ACS1;FACL1;FACL2;LACS;LACS1;LACS2
Gene_symbol
274	SLC27A2;ACSL1;ACSL3;ACSL4;ACSBG1;ACSL6;ACSL5;ACSBG2
908	ACSL1;ACSL3;ACSL4;ACSBG1;ACSL6;ACSL5;ACSBG2
909	ACSL1;ACSL3;ACSL4;ACSBG1;ACSL6;ACSL5;ACSBG2
4102	ACSL1;ACS1;FACL1;FACL2;LACS;LACS1;LACS2
4103	ACSL1;ACS1;FACL1;FACL2;LACS;LACS1;LACS2
1278	CPT1C;CPT1A;CPT1B;CPT2
272	ACOX1;ACOX3
826	ACOX1;ACOX3
830	ACOX1;ACOX3
900	ACOX1;ACOX3
904	ACOX1;ACOX3
2141	ACOX1;ACOX3
2144	ACOX1;ACOX3
2174	ACOX1;ACOX3
2177	ACOX1;ACOX3
2226	ACOX1;ACOX3
2230	ACOX1;ACOX3
2575	ACOX1;ACOX3
2579	ACOX1;ACOX3
2585	ACOX1;ACOX3
2588	ACOX1;ACOX3
3610	ACOX1;ACOX3
3611	ACOX1;ACOX3
3617	ACOX1;ACOX3
3618	ACOX1;ACOX3
3624	ACOX1;ACOX3
3625	ACOX1;ACOX3
3631	ACOX1;ACOX3
3645	ACOX1;ACOX3
4066	ACOX1;ACOX;PALMCOX;SCOX
4067	ACOX1;ACOX;PALMCOX;SCOX
4068	ACOX1;ACOX;PALMCOX;SCOX
4069	ACOX1;ACOX;PALMCOX;SCOX
4070	ACOX1;ACOX;PALMCOX;SCOX
4071	ACOX1;ACOX;PALMCOX;SCOX
4072	ACOX1;ACOX;PALMCOX;SCOX
4073	ACOX1;ACOX;PALMCOX;SCOX
4074	ACOX1;ACOX;PALMCOX;SCOX
4075	ACOX1;ACOX;PALMCOX;SCOX
4076	ACOX1;ACOX;PALMCOX;SCOX
4077	ACOX1;ACOX;PALMCOX;SCOX
4078	ACOX1;ACOX;PALMCOX;SCOX
4079	ACOX1;ACOX;PALMCOX;SCOX
276	ACADM
614	ACADM
828	ACADM
832	ACADM
901	ACADM
905	ACADM
1682	ACADM
1686	ACADM
1905	ACADM
1908	ACADM
2142	ACADM
2145	ACADM
2175	ACADM
2178	ACADM
2227	ACADM
2231	ACADM
2261	ACADM
2263	ACADM
2393	ACADM
2394	ACADM
2577	ACADM
2581	ACADM
2586	ACADM
2589	ACADM
277	ACADL
902	ACADL
906	ACADL
2143	ACADL
2146	ACADL
2176	ACADL
2179	ACADL
2228	ACADL
2232	ACADL
2578	ACADL
2582	ACADL
2587	ACADL
2590	ACADL
903	ACADVL
907	ACADVL
2229	ACADVL
2233	ACADVL
827	ACADS
829	ACADS
831	ACADS
841	ACADS
1681	ACADS
1685	ACADS
1904	ACADS
1907	ACADS
2576	ACADS
2580	ACADS
4060	ACADS;ACAD3;SCAD
4061	ACADS;ACAD3;SCAD
4062	ACADS;ACAD3;SCAD
4063	ACADS;ACAD3;SCAD
4064	ACADS;ACAD3;SCAD
4065	ACADS;ACAD3;SCAD
1683	ACADSB
1687	ACADSB
1906	ACADSB
1909	ACADSB
1910	ACADSB
4092	ACADSB;2-MEBCAD;ACAD7;SBCAD
4093	ACADSB;2-MEBCAD;ACAD7;SBCAD
4094	ACADSB;2-MEBCAD;ACAD7;SBCAD
1586	GCDH
1587	GCDH
1588	GCDH
1589	GCDH
4002	GCDH
1699	ECHS1;HADHA
1850	ECHS1;EHHADH;HADHA
1851	ECHS1;EHHADH;HADHA
1852	ECHS1;EHHADH;HADHA
1853	ECHS1;EHHADH;HADHA
1854	ECHS1;EHHADH;HADHA
1861	ECHS1;EHHADH;HADHA
1862	ECHS1;EHHADH;HADHA
1863	ECHS1;EHHADH;HADHA
1930	ECHS1;EHHADH;HADHA
2276	ECHS1;EHHADH;HADHA
2288	ECHS1;HADHA
2289	ECHS1;EHHADH;HADHA
2290	ECHS1;EHHADH;HADHA
2304	ECHS1;EHHADH;HADHA
2305	ECHS1;EHHADH;HADHA
2314	ECHS1;EHHADH;HADHA
2315	ECHS1;EHHADH;HADHA
2524	ECHS1;HADHA
2525	ECHS1;EHHADH;HADHA
2526	ECHS1;EHHADH;HADHA
2533	ECHS1;HADHA
2534	ECHS1;EHHADH;HADHA
2535	ECHS1;EHHADH;HADHA
2551	ECHS1;HADHA
2552	ECHS1;EHHADH;HADHA
2553	ECHS1;EHHADH;HADHA
2560	ECHS1;HADHA
2561	ECHS1;EHHADH;HADHA
2562	ECHS1;EHHADH;HADHA
2572	ECHS1;HADHA
2573	ECHS1;EHHADH;HADHA
2574	ECHS1;EHHADH;HADHA
2858	ECHS1;EHHADH;HADHA
3253	ECHS1;EHHADH;HADHA
3410	ECHS1;EHHADH;HADHA
3612	ECHS1;EHHADH;HADHA
3619	ECHS1;EHHADH;HADHA
3626	ECHS1;EHHADH;HADHA
1154	HADH
1312	EHHADH;HADH
1313	EHHADH;HADH
1314	EHHADH;HADH
1315	EHHADH;HADH
1316	EHHADH;HSD17B10;HADH;HSD17B4
2300	EHHADH;HSD17B10;HADH
2302	EHHADH;HSD17B10;HADH;HSD17B4
2518	HADH
2520	EHHADH;HADH
2522	EHHADH;HSD17B10;HADH;HSD17B4
2527	HADH
2529	EHHADH;HADH
2531	EHHADH;HSD17B10;HADH;HSD17B4
2536	HADH
2538	EHHADH;HADH
2540	EHHADH;HSD17B10;HADH;HSD17B4
2545	HADH
2547	EHHADH;HADH
2549	EHHADH;HSD17B10;HADH;HSD17B4
2554	HADH
2556	EHHADH;HADH
2558	EHHADH;HSD17B10;HADH;HSD17B4
2566	HADH
2568	EHHADH;HADH
2570	EHHADH;HSD17B10;HADH;HSD17B4
2622	HSD17B4
2623	EHHADH;HSD17B10;HADH;HSD17B4
2626	HSD17B4
2627	EHHADH;HSD17B10;HADH;HSD17B4
2785	EHHADH;HSD17B10;HADH
2787	EHHADH;HSD17B10;HADH;HSD17B4
2851	EHHADH;HSD17B10;HADH;HSD17B4
3252	EHHADH;HSD17B10;HADH;HSD17B4
3613	EHHADH;HSD17B10;HADH;HSD17B4
3620	EHHADH;HSD17B10;HADH;HSD17B4
3627	EHHADH;HSD17B10;HADH;HSD17B4
1155	HADHA
2519	HADHA
2521	HADHA
2523	HADHA
2528	HADHA
2530	HADHA
2532	HADHA
2537	HADHA
2539	HADHA
2541	HADHA
2546	HADHA
2548	HADHA
2550	HADHA
2555	HADHA
2557	HADHA
2559	HADHA
2567	HADHA
2569	HADHA
2571	HADHA
3614	HADHA
3621	HADHA
3628	HADHA
3632	HADHA
3646	HADHA
275	ACAA2;HADHB
622	ACAA2;ACAA1;HADHB
624	ACAA2;ACAA1;HADHB
836	ACAA2;HADHB
838	ACAA2;ACAA1;HADHB
840	ACAA2;ACAA1;HADHB
2148	ACAA2;HADHB
2149	ACAA2;ACAA1;HADHB
2150	ACAA2;ACAA1;HADHB
2181	ACAA2;HADHB
2182	ACAA2;ACAA1;HADHB
2183	ACAA2;ACAA1;HADHB
2234	ACAA2;HADHB
2235	ACAA2;ACAA1;HADHB
2236	ACAA2;ACAA1;HADHB
2542	ACAA2;HADHB
2543	ACAA2;ACAA1;HADHB
2544	ACAA2;ACAA1;HADHB
2563	ACAA2;HADHB
2564	ACAA2;ACAA1;HADHB
2565	ACAA2;ACAA1;HADHB
3615	ACAA1
3616	ACAA2;ACAA1;HADHB
3622	ACAA1
3623	ACAA2;ACAA1;HADHB
3629	ACAA1
3630	ACAA2;ACAA1;HADHB
3633	ACAA1
3647	ACAA1
140	ACAT1;ACAT2
141	ACAT1;ACAT2
142	ACAT1;ACAT2
143	ACAT1;ACAT2
144	ACAT1;ACAT2
145	ACAT1;ACAT2
146	ACAT1;ACAT2
147	ACAT1;ACAT2
148	ACAT1;ACAT2
149	ACAT1;ACAT2
150	ACAT1;ACAT2
621	ACAT1;ACAT2
623	ACAT1;ACAT2
837	ACAT1;ACAT2
839	ACAT1;ACAT2
Gene_symbol
987	CAD
988	CAD
989	CAD
1328	CAD
1329	CAD
1245	DHODH
1246	DHODH
Gene_symbol
331	NAT8L
332	ASPA;ACY3
357	ASPA;ACY3
366	ASPA;ACY3
4051	RIMKLA;FAM80A;NAAGS;NAAGS-II
4052	RIMKLA;FAM80A;NAAGS;NAAGS-II
4053	RIMKLA;FAM80A;NAAGS;NAAGS-II
4054	RIMKLA;FAM80A;NAAGS;NAAGS-II
4035	NAALAD2;NAALADL1;FOLH1
4036	NAALAD2;NAALADL1;FOLH1
4055	FOLH1;FGCP;FOLH;GCP2;GCPII;NAALAD1;NAALAdase;PSM;PSMA;mGCP
4056	FOLH1;FGCP;FOLH;GCP2;GCPII;NAALAD1;NAALAdase;PSM;PSMA;mGCP
Gene_symbol
329	ASNS
330	ASNS
392	ASNS
393	ASNS
3134	ASPG
4057	ASRGL1;ALP;ALP1;CRASH
4058	ASRGL1;ALP;ALP1;CRASH
Gene_symbol
797	ADSSL1;ADSS
798	ADSSL1;ADSS
799	ADSSL1;ADSS
755	ADSL
756	ADSL
757	ADSL
2447	ADSL
2448	ADSL
1291	ASS1
1292	ASS1
1293	ASS1
760	ASL
761	ASL
762	ASL
Gene_symbol
248	IL4I1
249	IL4I1
432	IL4I1
433	IL4I1
447	IL4I1
448	IL4I1
455	IL4I1
456	IL4I1
457	IL4I1
512	IL4I1
513	IL4I1
514	IL4I1
886	IL4I1
1439	IL4I1
1440	IL4I1
3124	IL4I1
246	GOT1;GOT2
247	GOT1;GOT2
458	GOT1;GOT2
460	GOT1;GOT2
462	GOT1;GOT2
518	GOT1;GOT2
520	GOT1;GOT2
522	GOT1;GOT2
594	GOT1;GOT2
595	GOT1;GOT2
596	GOT1;GOT2
597	GOT1;GOT2
1566	GOT1;GOT2
1669	GOT1;GOT2
1670	GOT1;GOT2
2780	GOT1;GOT2
2781	GOT1;GOT2
Gene_symbol
180	GAD1;GAD2
181	GAD1;GAD2
182	GAD1;GAD2
333	GAD1;GAD2
334	GAD1;GAD2
1120	GAD1;GAD2
1122	GAD1;GAD2
1570	GAD1;GAD2
1572	GAD1;GAD2
4059	GADL1;ADC;CSADC;HuADC;HuCSADC
Gene_symbol
3896	SMOX
3897	SMOX
1233	AOC2;AOC3
1553	AOC2;AOC3
1610	AOC2;AOC3
1667	AOC2;AOC3
1892	AOC2;AOC3
2247	AOC2;AOC3
2339	AOC2;AOC3
2341	AOC2;AOC3
2831	AOC2;AOC3
3145	AOC2;AOC3
3239	AOC2;AOC3
183	ALDH2;ALDH1B1;ALDH3A2
184	ALDH2;ALDH1B1;ALDH9A1;ALDH3A2;ALDH7A1
362	ALDH2;ALDH1B1;ALDH9A1;ALDH3A2;ALDH7A1
429	ALDH2;ALDH1B1;ALDH9A1;ALDH3A2;ALDH7A1
489	ALDH2;ALDH1B1;ALDH9A1;ALDH3A2;ALDH7A1
491	ALDH2;ALDH1B1;ALDH9A1;ALDH3A2;ALDH7A1
492	ALDH2;ALDH1B1;ALDH9A1;ALDH3A2;ALDH7A1
602	ALDH2;ALDH1B1;ALDH9A1;ALDH3A2;ALDH7A1
1145	ALDH2;ALDH1B1;ALDH9A1;ALDH3A2;ALDH7A1
1322	ALDH2;ALDH1B1;ALDH9A1;ALDH3A2;ALDH7A1
1628	ALDH2;ALDH1B1;ALDH9A1;ALDH3A2;ALDH7A1
1629	ALDH2;ALDH1B1;ALDH9A1;ALDH3A2;ALDH7A1
1696	ALDH2;ALDH1B1;ALDH9A1;ALDH3A2;ALDH7A1
1697	ALDH2;ALDH1B1;ALDH9A1;ALDH3A2;ALDH7A1
1827	ALDH2;ALDH1B1;ALDH9A1;ALDH3A2;ALDH7A1
1829	ALDH2;ALDH1B1;ALDH9A1;ALDH3A2;ALDH7A1
1830	ALDH2;ALDH1B1;ALDH9A1;ALDH3A2;ALDH7A1
1957	ALDH2;ALDH1B1;ALDH9A1;ALDH3A2;ALDH7A1
2190	ALDH2;ALDH1B1;ALDH9A1;ALDH3A2;ALDH7A1
2252	ALDH2;ALDH1B1;ALDH9A1;ALDH3A2;ALDH7A1
2421	ALDH2;ALDH1B1;ALDH9A1;ALDH3A2;ALDH7A1
2702	ALDH2;ALDH1B1;ALDH9A1;ALDH3A2;ALDH7A1
2703	ALDH2;ALDH1B1;ALDH9A1;ALDH3A2;ALDH7A1
2777	ALDH2;ALDH1B1;ALDH9A1;ALDH3A2;ALDH7A1
2778	ALDH2;ALDH1B1;ALDH9A1;ALDH3A2;ALDH7A1
2824	ALDH2;ALDH1B1;ALDH9A1;ALDH3A2;ALDH7A1
2825	ALDH2;ALDH1B1;ALDH9A1;ALDH3A2;ALDH7A1
2828	ALDH2;ALDH1B1;ALDH9A1;ALDH3A2;ALDH7A1
363	ALDH3A1;ALDH1A3;ALDH3B1;ALDH3B2
430	ALDH3A1;ALDH1A3;ALDH3B1;ALDH3B2
490	ALDH3A1;ALDH1A3;ALDH3B1;ALDH3B2
493	ALDH3A1;ALDH1A3;ALDH3B1;ALDH3B2
494	ALDH3A1;ALDH1A3;ALDH3B1;ALDH3B2
495	ALDH3A1;ALDH1A3;ALDH3B1;ALDH3B2
603	ALDH3A1;ALDH1A3;ALDH3B1;ALDH3B2
1621	ALDH3A1;ALDH1A3;ALDH3B1;ALDH3B2
1622	ALDH3A1;ALDH1A3;ALDH3B1;ALDH3B2
1623	ALDH3A1;ALDH1A3;ALDH3B1;ALDH3B2
1624	ALDH3A1;ALDH1A3;ALDH3B1;ALDH3B2
1705	ALDH3A1;ALDH1A3;ALDH3B1;ALDH3B2
1706	ALDH3A1;ALDH1A3;ALDH3B1;ALDH3B2
1970	ALDH3A1;ALDH1A3;ALDH3B1;ALDH3B2
1971	ALDH3A1;ALDH1A3;ALDH3B1;ALDH3B2
1972	ALDH3A1;ALDH1A3;ALDH3B1;ALDH3B2
1973	ALDH3A1;ALDH1A3;ALDH3B1;ALDH3B2
2680	ALDH3A1;ALDH1A3;ALDH3B1;ALDH3B2
2681	ALDH3A1;ALDH1A3;ALDH3B1;ALDH3B2
2682	ALDH3A1;ALDH1A3;ALDH3B1;ALDH3B2
2683	ALDH3A1;ALDH1A3;ALDH3B1;ALDH3B2
2688	ALDH3A1;ALDH1A3;ALDH3B1;ALDH3B2
2689	ALDH3A1;ALDH1A3;ALDH3B1;ALDH3B2
2690	ALDH3A1;ALDH1A3;ALDH3B1;ALDH3B2
2691	ALDH3A1;ALDH1A3;ALDH3B1;ALDH3B2
2694	ALDH3A1;ALDH1A3;ALDH3B1;ALDH3B2
2695	ALDH3A1;ALDH1A3;ALDH3B1;ALDH3B2
2696	ALDH3A1;ALDH1A3;ALDH3B1;ALDH3B2
2697	ALDH3A1;ALDH1A3;ALDH3B1;ALDH3B2
2769	ALDH3A1;ALDH1A3;ALDH3B1;ALDH3B2
3361	ALDH3A1;ALDH1A3;ALDH3B1;ALDH3B2
3725	ALDH3A1;ALDH1A3;ALDH3B1;ALDH3B2
3726	ALDH3A1;ALDH1A3;ALDH3B1;ALDH3B2
3739	ALDH3A1;ALDH1A3;ALDH3B1;ALDH3B2
Gene_symbol
814	CNDP2
816	CNDP2
818	CNDP2
1326	CNDP2
815	CNDP1
817	CNDP1
819	CNDP1
1327	CNDP1
1961	CNDP1
1962	CNDP1
1963	CNDP1
611	CARNS1
612	CARNS1
812	CARNS1
813	CARNS1
1325	CARNS1
1959	CARNS1
1960	CARNS1
Gene_symbol
608	ABAT
609	ABAT
610	ABAT
1094	ABAT
1095	ABAT
1096	ABAT
471	ALDH6A1
472	ALDH6A1
473	ALDH6A1
475	ALDH6A1
477	ALDH6A1
478	ALDH6A1
479	ALDH6A1
480	ALDH6A1
2020	ALDH6A1
Gene_symbol
604	UPB1
605	UPB1
606	UPB1
607	UPB1
2493	UPB1
2494	UPB1
3682	UPB1
1492	DPYS
1493	DPYS
1494	DPYS
1495	DPYS
1864	DPYS
1865	DPYS
3681	DPYS
679	DPYD
680	DPYD
681	DPYD
682	DPYD
994	DPYD
995	DPYD
3680	DPYD
1249	UPP2;UPP1
1250	UPP2;UPP1
1583	UPP2;UPP1
3683	UPP2;UPP1
350	UCKL1;UCK2;UCK1
351	UCKL1;UCK2;UCK1
353	UCKL1;UCK2;UCK1
354	UCKL1;UCK2;UCK1
355	UCKL1;UCK2;UCK1
356	UCKL1;UCK2;UCK1
663	UCKL1;UCK2;UCK1
664	UCKL1;UCK2;UCK1
666	UCKL1;UCK2;UCK1
667	UCKL1;UCK2;UCK1
672	UCKL1;UCK2;UCK1
673	UCKL1;UCK2;UCK1
674	UCKL1;UCK2;UCK1
675	UCKL1;UCK2;UCK1
677	UCKL1;UCK2;UCK1
678	UCKL1;UCK2;UCK1
1053	UCKL1;UCK2;UCK1
1054	UCKL1;UCK2;UCK1
1055	UCKL1;UCK2;UCK1
1056	UCKL1;UCK2;UCK1
1253	UCKL1;UCK2;UCK1
1254	UCKL1;UCK2;UCK1
1374	UCKL1;UCK2;UCK1
1375	UCKL1;UCK2;UCK1
1382	UCKL1;UCK2;UCK1
1383	UCKL1;UCK2;UCK1
1384	UCKL1;UCK2;UCK1
1385	UCKL1;UCK2;UCK1
1522	UCKL1;UCK2;UCK1
1523	UCKL1;UCK2;UCK1
1526	UCKL1;UCK2;UCK1
1527	UCKL1;UCK2;UCK1
1548	UCKL1;UCK2;UCK1
1549	UCKL1;UCK2;UCK1
1550	UCKL1;UCK2;UCK1
1551	UCKL1;UCK2;UCK1
3686	UCKL1;UCK2;UCK1
96	NT5C1B-RDH14;NT5C3B;NT5C2;NT5C;NT5E;NT5C3A;NT5M;NT5C1A;NT5C1B
97	NT5C1B-RDH14;NT5C3B;NT5C2;NT5C;NT5E;NT5C3A;NT5M;NT5C1A;NT5C1B
347	NT5C1B-RDH14;NT5C3B;NT5C2;NT5C;NT5E;NT5C3A;NT5M;NT5C1A;NT5C1B
665	NT5C1B-RDH14;NT5C3B;NT5C2;NT5C;NT5E;NT5C3A;NT5M;NT5C1A;NT5C1B
786	NT5C1B-RDH14;NT5C3B;NT5C2;NT5C;NT5E;NT5C3A;NT5M;NT5C1A;NT5C1B
787	NT5C1B-RDH14;NT5C3B;NT5C2;NT5C;NT5E;NT5C3A;NT5M;NT5C1A;NT5C1B
865	NT5C1B-RDH14;NT5C3B;NT5C2;NT5C;NT5E;NT5C3A;NT5M;NT5C1A;NT5C1B
866	NT5C1B-RDH14;NT5C3B;NT5C2;NT5C;NT5E;NT5C3A;NT5M;NT5C1A;NT5C1B
1065	NT5C1B-RDH14;NT5C3B;NT5C2;NT5C;NT5E;NT5C3A;NT5M;NT5C1A;NT5C1B
1106	NT5C1B-RDH14;NT5C3B;NT5C2;NT5C;NT5E;NT5C3A;NT5M;NT5C1A;NT5C1B
1307	NT5C1B-RDH14;NT5C3B;NT5C2;NT5C;NT5E;NT5C3A;NT5M;NT5C1A;NT5C1B
1308	NT5C1B-RDH14;NT5C3B;NT5C2;NT5C;NT5E;NT5C3A;NT5M;NT5C1A;NT5C1B
1370	NT5C1B-RDH14;NT5C3B;NT5C2;NT5C;NT5E;NT5C3A;NT5M;NT5C1A;NT5C1B
1371	NT5C1B-RDH14;NT5C3B;NT5C2;NT5C;NT5E;NT5C3A;NT5M;NT5C1A;NT5C1B
1396	NT5C1B-RDH14;NT5C3B;NT5C2;NT5C;NT5E;NT5C3A;NT5M;NT5C1A;NT5C1B
1518	NT5C1B-RDH14;NT5C3B;NT5C2;NT5C;NT5E;NT5C3A;NT5M;NT5C1A;NT5C1B
1713	NT5C1B-RDH14;NT5C3B;NT5C2;NT5C;NT5E;NT5C3A;NT5M;NT5C1A;NT5C1B
1714	NT5C1B-RDH14;NT5C3B;NT5C2;NT5C;NT5E;NT5C3A;NT5M;NT5C1A;NT5C1B
1996	NT5C1B-RDH14;NT5C3B;NT5C2;NT5C;NT5E;NT5C3A;NT5M;NT5C1A;NT5C1B
3406	NT5C3L;NT5C2;NT5C;NT5E;NT5C3;NT5M;NT5C1A;NT5C1B
670	UPRT
671	UPRT
1059	PNP
1060	PNP
1243	PNP
1244	PNP
1309	PNP
1310	PNP
1422	PNP
1423	PNP
1502	PNP
1503	PNP
1504	PNP
1505	PNP
1582	PNP
1632	PNP
1633	PNP
1738	PNP
1739	PNP
3766	PNP
4018	PNP
1066	TYMP
1067	TYMP
1311	TYMP
1584	TYMP
1740	TYMP
3674	TYMP
3684	TYMP
1063	TK1;TK2
1064	TK1;TK2
1388	TK1;TK2
3687	TK1;TK2
Gene_symbol
4109	ECHDC1;HEL-S-76;MMCD;dJ351K20.2
1239	PCCA;PCCB
1240	PCCA;PCCB
1241	PCCA;PCCB
1242	PCCA;PCCB
3868	PCCA;PCCB
1747	MCEE
1748	MCEE
1749	MCEE
1750	MCEE
3992	MCEE
560	MUT
561	MUT
562	MUT
563	MUT
303	SUCLG2;SUCLG1;SUCLA2
304	SUCLG2;SUCLG1;SUCLA2
305	SUCLG2;SUCLG1;SUCLA2
510	SUCLG2;SUCLG1;SUCLA2
511	SUCLG2;SUCLG1;SUCLA2
1560	SUCLG2;SUCLG1;SUCLA2
1561	SUCLG2;SUCLG1;SUCLA2
279	SUCLG2;SUCLG1;SUCLA2
280	SUCLG2;SUCLG1;SUCLA2
281	SUCLG2;SUCLG1;SUCLA2
Gene_symbol
827	ACADS
829	ACADS
831	ACADS
841	ACADS
1681	ACADS
1685	ACADS
1904	ACADS
1907	ACADS
2576	ACADS
2580	ACADS
4060	ACADS;ACAD3;SCAD
4061	ACADS;ACAD3;SCAD
4062	ACADS;ACAD3;SCAD
4063	ACADS;ACAD3;SCAD
4064	ACADS;ACAD3;SCAD
4065	ACADS;ACAD3;SCAD
272	ACOX1;ACOX3
826	ACOX1;ACOX3
830	ACOX1;ACOX3
900	ACOX1;ACOX3
904	ACOX1;ACOX3
2141	ACOX1;ACOX3
2144	ACOX1;ACOX3
2174	ACOX1;ACOX3
2177	ACOX1;ACOX3
2226	ACOX1;ACOX3
2230	ACOX1;ACOX3
2575	ACOX1;ACOX3
2579	ACOX1;ACOX3
2585	ACOX1;ACOX3
2588	ACOX1;ACOX3
3610	ACOX1;ACOX3
3611	ACOX1;ACOX3
3617	ACOX1;ACOX3
3618	ACOX1;ACOX3
3624	ACOX1;ACOX3
3625	ACOX1;ACOX3
3631	ACOX1;ACOX3
3645	ACOX1;ACOX3
4066	ACOX1;ACOX;PALMCOX;SCOX
4067	ACOX1;ACOX;PALMCOX;SCOX
4068	ACOX1;ACOX;PALMCOX;SCOX
4069	ACOX1;ACOX;PALMCOX;SCOX
4070	ACOX1;ACOX;PALMCOX;SCOX
4071	ACOX1;ACOX;PALMCOX;SCOX
4072	ACOX1;ACOX;PALMCOX;SCOX
4073	ACOX1;ACOX;PALMCOX;SCOX
4074	ACOX1;ACOX;PALMCOX;SCOX
4075	ACOX1;ACOX;PALMCOX;SCOX
4076	ACOX1;ACOX;PALMCOX;SCOX
4077	ACOX1;ACOX;PALMCOX;SCOX
4078	ACOX1;ACOX;PALMCOX;SCOX
4079	ACOX1;ACOX;PALMCOX;SCOX
1699	ECHS1;HADHA
1850	ECHS1;EHHADH;HADHA
1851	ECHS1;EHHADH;HADHA
1852	ECHS1;EHHADH;HADHA
1853	ECHS1;EHHADH;HADHA
1854	ECHS1;EHHADH;HADHA
1861	ECHS1;EHHADH;HADHA
1862	ECHS1;EHHADH;HADHA
1863	ECHS1;EHHADH;HADHA
1930	ECHS1;EHHADH;HADHA
2276	ECHS1;EHHADH;HADHA
2288	ECHS1;HADHA
2289	ECHS1;EHHADH;HADHA
2290	ECHS1;EHHADH;HADHA
2304	ECHS1;EHHADH;HADHA
2305	ECHS1;EHHADH;HADHA
2314	ECHS1;EHHADH;HADHA
2315	ECHS1;EHHADH;HADHA
2524	ECHS1;HADHA
2525	ECHS1;EHHADH;HADHA
2526	ECHS1;EHHADH;HADHA
2533	ECHS1;HADHA
2534	ECHS1;EHHADH;HADHA
2535	ECHS1;EHHADH;HADHA
2551	ECHS1;HADHA
2552	ECHS1;EHHADH;HADHA
2553	ECHS1;EHHADH;HADHA
2560	ECHS1;HADHA
2561	ECHS1;EHHADH;HADHA
2562	ECHS1;EHHADH;HADHA
2572	ECHS1;HADHA
2573	ECHS1;EHHADH;HADHA
2574	ECHS1;EHHADH;HADHA
2858	ECHS1;EHHADH;HADHA
3253	ECHS1;EHHADH;HADHA
3410	ECHS1;EHHADH;HADHA
3612	ECHS1;EHHADH;HADHA
3619	ECHS1;EHHADH;HADHA
3626	ECHS1;EHHADH;HADHA
133	MLYCD
134	MLYCD
135	MLYCD
2833	MLYCD
525	ACACA;ACACB
526	ACACA;ACACB
527	ACACA;ACACB
2381	ACACA;ACACB
2382	ACACA;ACACB
Gene_symbol
165	GLUL
166	GLUL
167	GLUL
168	GLUL
169	GLUL
170	GLS2;GLS
171	GLS2;GLS
172	GLS2;GLS
173	GLS2;GLS
1068	GLS2;GLS
1069	GLS2;GLS
3135	GLS2;GLS
Gene_symbol
180	GAD1;GAD2
181	GAD1;GAD2
182	GAD1;GAD2
333	GAD1;GAD2
334	GAD1;GAD2
1120	GAD1;GAD2
1122	GAD1;GAD2
1570	GAD1;GAD2
1572	GAD1;GAD2
Gene_symbol
608	ABAT
609	ABAT
610	ABAT
1094	ABAT
1095	ABAT
1096	ABAT
496	ALDH5A1
497	ALDH5A1
498	ALDH5A1
Gene_symbol
63	GLUD1;GLUD2
64	GLUD1;GLUD2
153	GLUD1;GLUD2
154	GLUD1;GLUD2
155	GLUD1;GLUD2
156	GLUD1;GLUD2
157	GLUD1;GLUD2
159	GLUD1;GLUD2
160	GLUD1;GLUD2
161	GLUD1;GLUD2
162	GLUD1;GLUD2
163	GLUD1;GLUD2
Gene_symbol
824	HAL
825	HAL
3131	HAL
1816	UROC1
1817	UROC1
1500	AMDHD1
1501	AMDHD1
1497	FTCD
1498	FTCD
1499	FTCD
1916	FTCD
1917	FTCD
x
1	R07604
x
1	R07604
x
1	R07603
x
1	R07603
Gene_symbol
246	GOT1;GOT2
247	GOT1;GOT2
458	GOT1;GOT2
460	GOT1;GOT2
462	GOT1;GOT2
518	GOT1;GOT2
520	GOT1;GOT2
522	GOT1;GOT2
594	GOT1;GOT2
595	GOT1;GOT2
596	GOT1;GOT2
597	GOT1;GOT2
1566	GOT1;GOT2
1669	GOT1;GOT2
1670	GOT1;GOT2
2780	GOT1;GOT2
2781	GOT1;GOT2
459	TAT
461	TAT
463	TAT
517	TAT
519	TAT
521	TAT
523	TAT
3461	TAT
3462	TAT
248	IL4I1
249	IL4I1
432	IL4I1
433	IL4I1
447	IL4I1
448	IL4I1
455	IL4I1
456	IL4I1
457	IL4I1
512	IL4I1
513	IL4I1
514	IL4I1
886	IL4I1
1439	IL4I1
1440	IL4I1
3124	IL4I1
967	HPD
968	HPD
1605	HPD
1606	HPD
1607	HPD
970	MIF
1994	MIF
1603	HGD
1604	HGD
1914	GSTZ1
1915	GSTZ1
2188	GSTZ1
2189	GSTZ1
961	FAH
962	FAH
Gene_symbol
1759	TPO
1923	TPO
1924	TPO
2073	TPO
2074	TPO
2212	TPO
2213	TPO
2216	TPO
2217	TPO
3798	TPO
3799	TPO
3800	TPO
3801	TPO
453	DDC
454	DDC
465	DDC
524	DDC
821	DDC
823	DDC
1364	DDC
1365	DDC
1707	DDC
1708	DDC
2709	DDC
1232	MAOA;MAOB
1431	MAOA;MAOB
1552	MAOA;MAOB
1609	MAOA;MAOB
1613	MAOA;MAOB
1614	MAOA;MAOB
1666	MAOA;MAOB
1810	MAOA;MAOB
1811	MAOA;MAOB
1819	MAOA;MAOB
1820	MAOA;MAOB
2245	MAOA;MAOB
2246	MAOA;MAOB
2338	MAOA;MAOB
2340	MAOA;MAOB
2496	MAOA;MAOB
2692	MAOA;MAOB
2693	MAOA;MAOB
2698	MAOA;MAOB
2699	MAOA;MAOB
2700	MAOA;MAOB
2701	MAOA;MAOB
2707	MAOA;MAOB
2708	MAOA;MAOB
3132	MAOA;MAOB
3757	MAOA;MAOB
3758	MAOA;MAOB
3759	MAOA;MAOB
1233	AOC2;AOC3
1553	AOC2;AOC3
1610	AOC2;AOC3
1667	AOC2;AOC3
1892	AOC2;AOC3
2247	AOC2;AOC3
2339	AOC2;AOC3
2341	AOC2;AOC3
2831	AOC2;AOC3
3145	AOC2;AOC3
3239	AOC2;AOC3
363	ALDH3A1;ALDH1A3;ALDH3B1;ALDH3B2
430	ALDH3A1;ALDH1A3;ALDH3B1;ALDH3B2
490	ALDH3A1;ALDH1A3;ALDH3B1;ALDH3B2
493	ALDH3A1;ALDH1A3;ALDH3B1;ALDH3B2
494	ALDH3A1;ALDH1A3;ALDH3B1;ALDH3B2
495	ALDH3A1;ALDH1A3;ALDH3B1;ALDH3B2
603	ALDH3A1;ALDH1A3;ALDH3B1;ALDH3B2
1621	ALDH3A1;ALDH1A3;ALDH3B1;ALDH3B2
1622	ALDH3A1;ALDH1A3;ALDH3B1;ALDH3B2
1623	ALDH3A1;ALDH1A3;ALDH3B1;ALDH3B2
1624	ALDH3A1;ALDH1A3;ALDH3B1;ALDH3B2
1705	ALDH3A1;ALDH1A3;ALDH3B1;ALDH3B2
1706	ALDH3A1;ALDH1A3;ALDH3B1;ALDH3B2
1970	ALDH3A1;ALDH1A3;ALDH3B1;ALDH3B2
1971	ALDH3A1;ALDH1A3;ALDH3B1;ALDH3B2
1972	ALDH3A1;ALDH1A3;ALDH3B1;ALDH3B2
1973	ALDH3A1;ALDH1A3;ALDH3B1;ALDH3B2
2680	ALDH3A1;ALDH1A3;ALDH3B1;ALDH3B2
2681	ALDH3A1;ALDH1A3;ALDH3B1;ALDH3B2
2682	ALDH3A1;ALDH1A3;ALDH3B1;ALDH3B2
2683	ALDH3A1;ALDH1A3;ALDH3B1;ALDH3B2
2688	ALDH3A1;ALDH1A3;ALDH3B1;ALDH3B2
2689	ALDH3A1;ALDH1A3;ALDH3B1;ALDH3B2
2690	ALDH3A1;ALDH1A3;ALDH3B1;ALDH3B2
2691	ALDH3A1;ALDH1A3;ALDH3B1;ALDH3B2
2694	ALDH3A1;ALDH1A3;ALDH3B1;ALDH3B2
2695	ALDH3A1;ALDH1A3;ALDH3B1;ALDH3B2
2696	ALDH3A1;ALDH1A3;ALDH3B1;ALDH3B2
2697	ALDH3A1;ALDH1A3;ALDH3B1;ALDH3B2
2769	ALDH3A1;ALDH1A3;ALDH3B1;ALDH3B2
3361	ALDH3A1;ALDH1A3;ALDH3B1;ALDH3B2
3725	ALDH3A1;ALDH1A3;ALDH3B1;ALDH3B2
3726	ALDH3A1;ALDH1A3;ALDH3B1;ALDH3B2
3739	ALDH3A1;ALDH1A3;ALDH3B1;ALDH3B2
13	TYR
14	TYR
19	TYR
20	TYR
23	TYR
515	TYR
516	TYR
1362	TYR
1363	TYR
1543	TYR
1828	TYR
2506	TYR
2684	TYR
2685	TYR
1203	TH
1204	TH
Gene_symbol
1184	PAH
1185	PAH
1186	PAH
3390	PAH
Gene_symbol
499	AASS
500	AASS
1511	AASS
1512	AASS
2016	HYKK
2017	HYKK
4019	PHYKPL
4020	PHYKPL
1879	ALDH7A1
1880	ALDH7A1
1881	ALDH7A1
1882	ALDH7A1
1883	ALDH7A1
1884	ALDH7A1
2384	ALDH7A1
2385	ALDH7A1
2672	ALDH7A1
2673	ALDH7A1
1283	AADAT
1284	AADAT
1285	AADAT
120	DLD
1125	DLD
2159	DLD
3533	DLD
3534	DLD
3535	DLD
3536	DLD
3537	DLD
3806	DLD
3808	DLD
4082	DLD;DLDD;DLDH;E3;GCSL;LAD;PHE3
4083	DLD;DLDD;DLDH;E3;GCSL;LAD;PHE3
4084	DLD;DLDD;DLDH;E3;GCSL;LAD;PHE3
4085	DLD;DLDD;DLDH;E3;GCSL;LAD;PHE3
4086	DLD;DLDD;DLDH;E3;GCSL;LAD;PHE3
4087	DLD;DLDD;DLDH;E3;GCSL;LAD;PHE3
4088	DLD;DLDD;DLDH;E3;GCSL;LAD;PHE3
4089	DLD;DLDD;DLDH;E3;GCSL;LAD;PHE3
1586	GCDH
1587	GCDH
1588	GCDH
1589	GCDH
4002	GCDH
1699	ECHS1;HADHA
1850	ECHS1;EHHADH;HADHA
1851	ECHS1;EHHADH;HADHA
1852	ECHS1;EHHADH;HADHA
1853	ECHS1;EHHADH;HADHA
1854	ECHS1;EHHADH;HADHA
1861	ECHS1;EHHADH;HADHA
1862	ECHS1;EHHADH;HADHA
1863	ECHS1;EHHADH;HADHA
1930	ECHS1;EHHADH;HADHA
2276	ECHS1;EHHADH;HADHA
2288	ECHS1;HADHA
2289	ECHS1;EHHADH;HADHA
2290	ECHS1;EHHADH;HADHA
2304	ECHS1;EHHADH;HADHA
2305	ECHS1;EHHADH;HADHA
2314	ECHS1;EHHADH;HADHA
2315	ECHS1;EHHADH;HADHA
2524	ECHS1;HADHA
2525	ECHS1;EHHADH;HADHA
2526	ECHS1;EHHADH;HADHA
2533	ECHS1;HADHA
2534	ECHS1;EHHADH;HADHA
2535	ECHS1;EHHADH;HADHA
2551	ECHS1;HADHA
2552	ECHS1;EHHADH;HADHA
2553	ECHS1;EHHADH;HADHA
2560	ECHS1;HADHA
2561	ECHS1;EHHADH;HADHA
2562	ECHS1;EHHADH;HADHA
2572	ECHS1;HADHA
2573	ECHS1;EHHADH;HADHA
2574	ECHS1;EHHADH;HADHA
2858	ECHS1;EHHADH;HADHA
3253	ECHS1;EHHADH;HADHA
3410	ECHS1;EHHADH;HADHA
3612	ECHS1;EHHADH;HADHA
3619	ECHS1;EHHADH;HADHA
3626	ECHS1;EHHADH;HADHA
1154	HADH
1312	EHHADH;HADH
1313	EHHADH;HADH
1314	EHHADH;HADH
1315	EHHADH;HADH
1316	EHHADH;HSD17B10;HADH;HSD17B4
2300	EHHADH;HSD17B10;HADH
2302	EHHADH;HSD17B10;HADH;HSD17B4
2518	HADH
2520	EHHADH;HADH
2522	EHHADH;HSD17B10;HADH;HSD17B4
2527	HADH
2529	EHHADH;HADH
2531	EHHADH;HSD17B10;HADH;HSD17B4
2536	HADH
2538	EHHADH;HADH
2540	EHHADH;HSD17B10;HADH;HSD17B4
2545	HADH
2547	EHHADH;HADH
2549	EHHADH;HSD17B10;HADH;HSD17B4
2554	HADH
2556	EHHADH;HADH
2558	EHHADH;HSD17B10;HADH;HSD17B4
2566	HADH
2568	EHHADH;HADH
2570	EHHADH;HSD17B10;HADH;HSD17B4
2622	HSD17B4
2623	EHHADH;HSD17B10;HADH;HSD17B4
2626	HSD17B4
2627	EHHADH;HSD17B10;HADH;HSD17B4
2785	EHHADH;HSD17B10;HADH
2787	EHHADH;HSD17B10;HADH;HSD17B4
2851	EHHADH;HSD17B10;HADH;HSD17B4
3252	EHHADH;HSD17B10;HADH;HSD17B4
3613	EHHADH;HSD17B10;HADH;HSD17B4
3620	EHHADH;HSD17B10;HADH;HSD17B4
3627	EHHADH;HSD17B10;HADH;HSD17B4
140	ACAT1;ACAT2
141	ACAT1;ACAT2
142	ACAT1;ACAT2
143	ACAT1;ACAT2
144	ACAT1;ACAT2
145	ACAT1;ACAT2
146	ACAT1;ACAT2
147	ACAT1;ACAT2
148	ACAT1;ACAT2
149	ACAT1;ACAT2
150	ACAT1;ACAT2
621	ACAT1;ACAT2
623	ACAT1;ACAT2
837	ACAT1;ACAT2
839	ACAT1;ACAT2
Gene_symbol
806	AOC1
1424	AOC1
1432	AOC1
183	ALDH2;ALDH1B1;ALDH3A2
184	ALDH2;ALDH1B1;ALDH9A1;ALDH3A2;ALDH7A1
362	ALDH2;ALDH1B1;ALDH9A1;ALDH3A2;ALDH7A1
429	ALDH2;ALDH1B1;ALDH9A1;ALDH3A2;ALDH7A1
489	ALDH2;ALDH1B1;ALDH9A1;ALDH3A2;ALDH7A1
491	ALDH2;ALDH1B1;ALDH9A1;ALDH3A2;ALDH7A1
492	ALDH2;ALDH1B1;ALDH9A1;ALDH3A2;ALDH7A1
602	ALDH2;ALDH1B1;ALDH9A1;ALDH3A2;ALDH7A1
1145	ALDH2;ALDH1B1;ALDH9A1;ALDH3A2;ALDH7A1
1322	ALDH2;ALDH1B1;ALDH9A1;ALDH3A2;ALDH7A1
1628	ALDH2;ALDH1B1;ALDH9A1;ALDH3A2;ALDH7A1
1629	ALDH2;ALDH1B1;ALDH9A1;ALDH3A2;ALDH7A1
1696	ALDH2;ALDH1B1;ALDH9A1;ALDH3A2;ALDH7A1
1697	ALDH2;ALDH1B1;ALDH9A1;ALDH3A2;ALDH7A1
1827	ALDH2;ALDH1B1;ALDH9A1;ALDH3A2;ALDH7A1
1829	ALDH2;ALDH1B1;ALDH9A1;ALDH3A2;ALDH7A1
1830	ALDH2;ALDH1B1;ALDH9A1;ALDH3A2;ALDH7A1
1957	ALDH2;ALDH1B1;ALDH9A1;ALDH3A2;ALDH7A1
2190	ALDH2;ALDH1B1;ALDH9A1;ALDH3A2;ALDH7A1
2252	ALDH2;ALDH1B1;ALDH9A1;ALDH3A2;ALDH7A1
2421	ALDH2;ALDH1B1;ALDH9A1;ALDH3A2;ALDH7A1
2702	ALDH2;ALDH1B1;ALDH9A1;ALDH3A2;ALDH7A1
2703	ALDH2;ALDH1B1;ALDH9A1;ALDH3A2;ALDH7A1
2777	ALDH2;ALDH1B1;ALDH9A1;ALDH3A2;ALDH7A1
2778	ALDH2;ALDH1B1;ALDH9A1;ALDH3A2;ALDH7A1
2824	ALDH2;ALDH1B1;ALDH9A1;ALDH3A2;ALDH7A1
2825	ALDH2;ALDH1B1;ALDH9A1;ALDH3A2;ALDH7A1
2828	ALDH2;ALDH1B1;ALDH9A1;ALDH3A2;ALDH7A1
Gene_symbol
444	ODC1
[truncated: 1,361 more rows]

## Sheet: Removed_CoFactors
C_id	Compound
C00001	H2O
C00080	H
C00007	O2
C00003	C21H28N7O14P2
C00004	C21H29N7O14P2
C00011	CO2
C00002	C10H16N5O13P3
C00010	C21H36N7O16P3S
C00013	H4P2O7
C00009	H3PO4
C00008	C10H15N5O10P2
C00014	NH3
C00015	C9H14N2O12P2
C00027	H2O2
C00020	C10H14N5O7P
C00016	C27H33N9O15P2
C00055	C9H14N3O8P
C00035	C10H15N5O11P2
C00044	C10H16N5O14P3
C00363	C10H16N2O11P2
C00063	C9H16N3O14P3
C00094	H2SO3
C00059	H2SO4
C00088	HNO2
C00283	H2S
C00075	C9H15N2O15P3
C00105	C9H13N2O9P
C00061	C17H21N4O9P
C00698	Cl
C00081	C10H15N4O14P3
C00104	C10H14N4O11P2
C00144	C10H14N5O8P
C00237	CO
C00130	C10H13N4O8P
C00533	NO
C00112	C9H15N3O11P2
C00244	HNO3
C00282	H2
C00206	C10H15N5O9P2
C00131	C10H16N5O12P3
C00365	C9H13N2O8P
C00177	CN
C00320	HS2O3
C00192	NH3O
C00286	C10H16N5O13P3
C00458	C9H16N3O13P3
C00459	C10H17N2O14P3
C14818	Fe
C00239	C9H14N3O7P
C00364	C10H15N2O8P
C00460	C9H15N2O14P3
C00087	S
C00887	N2O
C00361	C10H15N5O10P2
C00697	N2
C00705	C9H15N3O10P2
C13645	HBr
C00536	H5P3O10
C01328	OH
C01346	C9H14N2O11P2
C01528	H2Se
C11481	HSO3
C16487	HF
C00360	C10H14N5O6P
C14819	Fe
C00362	C10H14N5O7P
C00708	I
C01382	I2
C05684	SeO3
C05172	H3PO3Se
C05590	HI
C06697	AsO3
C11215	AsO4
C00175	Co
C00704	O2
C01861	S3O6
C06789	C2Cl4
C00305	Mg
C00700	C10H15N4O15P3
C00703	Hg
C01324	Br
C01345	C10H15N4O13P3
C02084	H2S4O6
C02306	H2PO3NH2
C05361	N2H4
C05697	H2SeO4
C07331	COS
C01344	C10H14N4O10P2
C01529	Se
C05360	N2H2
C12486	H3BO3
C19033	CS2
C19935	N3
C00742	F
C01319	Hg
C01792	C10Cl10O
C01818	H2N2O2
C02466	H3P3O9
C06232	H2MoO4
C06701	H3PO3
C09306	SO2
C19610	Mn
C19611	Mn
C00023	Fe
C00034	Mn
C00038	Zn
C00070	Cu
C00076	Ca
C00150	Mo
C00238	K
C00291	Ni
C00324	C6FeN6
C00753	W
C01330	Na
C01337	C10H14N4O12P2
C01342	NH4
C01347	C10H14N4O11P2
C01348	C10H15N4O14P3
C01358	NH4.
C01413	Cd
C01478	H3AsO4
C01913	C6FeN6
C03629	H2PO4NH2
C05339	H3PO2
C05529	H2S2O3
C06268	Cr
C06269	As
C06696	Pb
C06710	Ag
C07269	C5FeN6O
C07561	CCl4
C07695	C5FeN6O.
C07755	MgCl2
C07876	Mg(OH)2
C07964	Li2CO3
C08040	KI3
C08129	CaCO3
C08130	CaCl2
C08136	Ca3(PO4)2
C08142	NaF
C08219	KI
C11037	C8Cl4N2
C11042	C6Cl6
C11089	C2Cl2
C11091	C4Cl6
C11184	C8H12N5O5P
C11627	VO4
C11906	NaAsO2
C12217	C3FeN3
C12218	C2FeN2
C12505	MgSO4.
C12567	MgO
C12568	KOH
C12569	NaOH
C12570	ZnO
C12839	H3PO4.
C12893	MgCO3
C13102	BiN3H2O9
C13140	CaO
C13189	CaBr2
C13192	K2SO4
C13194	CaSO4
C13197	K2HPO4
C13198	KBr
C13199	Na2SO4
C13373	Xe
C13391	Al(OH)3
C13409	TiO2
C13515	RbOH
C13557	KNO3
C13558	Na2HPO4
C13563	NaCl
C13619	As2O3
C13881	Ba
C13884	Sr
C14042	NaI
C14184	C10Cl12
C14338	C6Cl5NO2
C14368	C12Cl10
C14434	C14H14NO4PS
C14711	NiCl2
C14816	C41H49F2N8O9P
C14817	C23H20F2N5O5PS
C15183	C53H84NO14P
C15226	TlCl
C15227	K2Cr2O7
C15233	CdCl2
C15234	Pb(NO3)2
C15235	SbCl3
C15455	Na2MoO4
C15471	Bi
C15472	Ge
C15473	Li
C15628	C24H42O7P2
C16454	Rn
C16455	Ra
C16456	Ra
C16457	Ra
C16459	SiO2
C16460	Be
C16844	OH
C16845	NO3
C17061	Rb
C17258	(CaSO4)2.
C17379	PbO
C17381	Al(OH)2
C17383	CoSO4
C17392	CaS
C17478	C2O4.
C17732	MgO2
C17942	C5H12NO5P
C18113	C12Cl8O
C18143	C8F18O2S
C18148	C8Cl8
C18180	C12Cl8O2
C18366	NaIO3
C18368	ClO2
C18381	CaI2
C18382	2HI.
C18385	Na2SeO3
C18445	CCl3NO2
C18446	C10Cl10
C18566	CaO2
C18567	Tl2SO4
C18647	Ca3(AsO4)2
C18648	PbHAsO4
C18670	HgO
C18673	NaCN
C18674	Zn3P2
C18713	CuSO4
C18714	Cu2O
C18765	O3Cl.
C18773	NH4SO3NH2
C18808	C2Cl3O2.
C18816	Na3AlF6
C18933	C6Cl4O2
C19000	C9H21O3PS3
C19017	C8H20O7P2
C19040	Na2SiF6
C19055	KAsF6
C19067	KCNO
C19113	CaCN2
C19122	C3Cl6O
C19157	Th
C19159	Pu
C19161	Cr
C19162	P
C19171	Co
C19179	InP
C19183	WC
C19192	Sb2O3
C19215	CoSO4.
C19248	C2Cl6
C19292	Mg3Si4O10(OH)2
C19295	KBrO3
C19299	C2F4
C19300	CN4O8
C19308	V2O5
C19328	Sb2S3
C19368	Cr
C19383	C12Br10O
C19424	Fe2O3
C19522	Mg4(OH)2(Si2O5)3.6H2O
C19523	NaClO2
C19535	C2Cl3N
C19550	CaSiO3
C19555	Fe2O3
C19572	SiO2
C19609	Ni
C20294	Cr
C20295	Cr
C20296	As
C20298	As
