# Supplementary material for: A graph neural network model to estimate cell-wise metabolic flux using single-cell RNA-seq data
Source: HighWire-hosted journal article supplement (doi:10.1101/gr.271205.120), 2021-07-22
Supplement: Supplementary_Table_S3.xlsx [file Supplementary_Table_S3.xlsx]

## Sheet: Table Description
Supplementary Table S3. ssGSEA results, metabolomics data and clusters of metabolic modules derived in the Pa03c cell line data. The four sub tables (1) ssGSEA results, (2) Complete Metabolomic data, and (3) Imbalance of metabolites, listed the following results on the Pa03c cell line data: (1) ssGSEA results on the glycolytic and TCA cycle related modules, (2) averaged metabolomic profiles of ea…
ssGSEA results	Row	Modules
	Column	Cells
Complete Metabolomic data	Row	Condition (control / APEX-1 KD)
	Column	Metabolites
Imbalance of metabolites	Row	Metabolites
	Predicted metabolic imbalance	Predicted metabolic imbalance
	Observed metabolomic imbalance	Observed metabolomic imbalance

## Sheet: ssGSEA results
	A7_tophat	B7_tophat	C7_tophat	D7_tophat	E7_tophat	G7_tophat	H7_tophat	A8_tophat	B8_tophat	C8_tophat	D8_tophat	E8_tophat	F8_tophat	G8_tophat	H8_tophat	A9_tophat	B9_tophat	C9_tophat	D9_tophat	E9_tophat	F9_tophat	G9_tophat	H9_tophat	A10_tophat	B10_tophat	C10_tophat	D10_tophat	E10_tophat	F10_tophat	G10_tophat	H10_tophat	A11_tophat	B11_tophat	C11_tophat	D11_tophat	E11_tophat	F11_tophat	H11_tophat	A12_tophat	B12_tophat	C12_tophat	D12_tophat	E12_tophat	F12_tophat	G12_tophat	H12_tophat	B1_tophat	C1_tophat	D1_tophat
M_2	0.188438	0.221981	0.219904	0.224507	0.150022	0.145381	0.164905	0.136439	0.196726	0.107456	0.131661	0.171122	0.178675	0.162545	0.161938	0.224776	0.115659	0.149894	0.196722	0.14863	0.15725	0.183654	0.195958	0.200391	0.103496	0.147602	0.153764	0.179	0.159446	0.140992	0.183105	0.141956	0.12645	0.161087	0.162893	0.155531	0.185638	0.173703	0.137902	0.175966	0.19366	0.103001	0.186765	0.166058	0.162603	0.155326	0.0898172	0.095179	0.115656
M_5	0.161601	0.117145	0.217439	0.221567	0.225582	0.22293	0.249525	0.138664	0.126749	0.100492	0.195033	0.240008	0.194854	0.200922	0.164828	0.239534	0.191633	0.240519	0.280562	0.0852488	0.140144	0.170552	0.200252	0.236483	-0.00949374	0.229671	0.135304	0.226933	0.0945704	0.204969	0.222013	0.213796	0.121681	0.122897	0.22409	0.156987	0.21196	0.21221	0.213719	0.200701	0.169349	0.21912	0.170686	0.190287	0.248973	0.236012	0.096607	0.163516	0.180412
M_7	0.135048	0.144776	0.13362	0.213136	0.131427	0.155197	0.109665	0.0568194	0.0992332	0.138105	0.0417386	0.0771728	0.0874084	0.0928523	0.0834806	0.177445	0.093518	0.110649	0.173548	0.149186	0.0783576	0.149555	0.198269	0.158413	0.111305	0.167407	0.0906665	0.150536	0.0852776	0.12229	0.133559	0.125753	0.115455	0.173575	0.0974843	0.0722365	0.149427	0.147508	0.0891355	0.0953202	0.173602	0.105594	0.0987979	0.173744	0.0934894	0.126059	0.0344358	0.0287502	0.0285589
M_8	0.372866	0.0339199	0.255663	0.459286	0.403102	0.320978	0.32627	0.356083	0.115585	0.30698	-0.114512	0.302256	0.26374	0.421178	0.299302	0.291939	0.304664	0.20382	0.368437	0.315871	0.212001	0.352002	0.307105	0.358492	0.218486	0.221907	0.30999	0.303059	-0.0202355	0.394881	0.0685633	0.311785	0.355503	0.227468	0.344356	-0.116346	0.274194	0.345169	0.332693	0.206099	0.235144	0.267954	0.100448	0.138825	0.190812	0.172361	0.322856	0.341544	0.36155
M_10	0.16539	0.244283	0.15756	0.230654	0.186136	0.209558	0.149797	0.18504	0.19788	0.118053	0.225758	0.110724	0.206695	0.193446	0.184848	0.242383	0.0678748	0.126903	0.216452	0.167713	0.0664832	0.198779	0.130202	0.18014	0.217522	0.167008	0.173383	0.145453	0.226838	0.0743272	0.191586	0.11375	0.123035	0.213467	0.0930185	0.266432	0.125899	0.106854	0.179429	0.162495	0.141414	0.0879658	0.168505	0.207295	0.134365	0.177956	0.0774992	0.130077	0.118734
M_11	0.157468	0.191245	0.177914	0.208556	0.118507	0.193677	0.0885546	0.0948526	0.162497	0.101404	0.116247	0.0203704	0.126667	0.126132	0.166157	0.196754	0.0308434	0.0482433	0.214785	0.142464	-0.02136	0.180301	0.119501	0.196952	0.0740825	0.0801273	0.104799	0.119091	0.144788	0.112715	0.143661	0.0798285	0.0757902	0.107554	0.0844789	0.0993239	0.174707	0.101669	0.111472	0.0724821	0.095071	0.048076	0.153668	0.127343	0.140929	0.125155	0.0189998	0.117762	0.0272825
M_12	0.0250211	0.0688431	0.124706	0.185923	0.0328824	0.0616148	0.0634033	0.0426684	0.103515	0.0772196	-0.0189623	0.173083	0.016727	0.134623	0.0169595	0.114107	0.0342898	0.128437	0.117359	0.0018786	0.0958832	0.00679929	0.08157	0.140201	0.00175222	0.109673	0.0301058	0.194854	0.215647	0.0873514	-0.0935667	0.0699523	0.115301	0.083548	0.110603	0.0953042	0.115122	0.162492	0.12154	0.135866	0.151319	-0.11941	0.0107942	0.0976181	0.0809978	0.0575614	0.0547507	-0.11305	-0.0051409
M_1	0.0946764	0.113545	0.127988	0.149759	0.197593	0.0848105	0.0551336	0.0230706	0.172724	0.102717	0.0239026	0.0895988	0.109195	0.117531	0.0639661	0.127216	0.0718446	0.142968	0.144159	0.0972894	0.0606833	0.0925807	0.0924955	0.0971428	0.0240601	0.0665077	0.052304	0.111635	0.10158	0.0760874	0.0698168	0.0733194	0.121261	0.0749775	0.0869756	0.0451636	0.0773072	0.0692526	0.0994013	0.0592529	0.101394	0.0771206	0.0283692	0.121555	0.0936066	0.103342	0.10964	0.0573258	0.0931522
[truncated: 113 more columns]

## Sheet: Complete Metabolomic data
	C00031	C00182	C00103	C00668	C00345	C00093	C00186	C00022	C00158	C00311	C00417	C00026	C00042	C00122	C00149	C00109	C01089	C00025	C00064	C00065	C00077	C00398
Control	0.7	1.07	1.94	1.79	0.71	2.42	1.14	0.58	0.84	1.47	1.24	1.7	4.65	3.19	3.42	0.52	0.78	0.8	0.88	0.63	0.62	0.53
APEX-1 inhibition	0.98	1.32	3.93	3.65	1.2	1.71	1.51	0.46	0.99	1.38	0.84	0.87	1.75	1.6	1.6	0.46	0.97	1.04	0.97	0.79	0.87	0.9
		、

## Sheet: Imbalance of metabolites
	Predicted metabolic imbalance	Observed metabolomic imbalance
C00668	-3.27247	-1.86
C00186	-1.70609	-0.37
C00022	0.201052	0.12
C00158	0.258507	-0.15
C00026	1.17958	0.83
C00042	0.754022	2.9
C00122	0.599597	1.59
C00149	0.115825	1.82
C00025	0.572381	-0.24
C00065	0.452014	-0.16
C00077	-0.183615	-0.25
