# Supplementary material for: A graph neural network model to estimate cell-wise metabolic flux using single-cell RNA-seq data
Source: HighWire-hosted journal article supplement (doi:10.1101/gr.271205.120), 2021-07-22
Supplement: Supplementary_Table_S4.xlsx [file Supplementary_Table_S4.xlsx]

## Sheet: Table Description
Supplementary Table S4. Predicted cell type specific fluxome and metabolic imbalance in the melanoma and head and neck cancer data. The four tables listed the predicted metabolic fluxome and imbalance of intermediate substrates in the GSE72056 melanoma and GSE103322 head and neck cancer data, respectively.
GSE72056_Metabolic_Flux	Row	Cell type
GSE103322_Metabolic_Flux	Column	Modules
GSE72056_Metabolic_Imbalance	Row	Cell type	The value = Out flux - In flux
GSE103322_Metabolic_Imbalance	Column	Modules	negative value for accumulation
			positive value for depletion

## Sheet: GSE72056_Metabolic_Flux
	M_1	M_2	M_3	M_4	M_5	M_6	M_7	M_8	M_10	M_11	M_12	M_13	M_18	M_21	M_22	M_23	M_24	M_25	M_26	M_28	M_29	M_30	M_31	M_32	M_33	M_34	M_35	M_36	M_37	M_38	M_40	M_42	M_43	M_45	M_46	M_47	M_48	M_49	M_52	M_53	M_54	M_55	M_56	M_57	M_58	M_60	M_61	M_62	M_63
T_cell	19.144	19.1247	4.29124	8.24651	0.000192998	16.654	12.6454	9.10656	15.2645	7.34073	9.021	9.81152	8.64491e-07	3.21548	1.43934	7.30302	4.06455e-05	18.6999	11.3872	16.4004	3.15639	3.68957	12.7295	5.03871	14.823	19.6627	19.619	5.06976	1.04494	0.817228	3.16301	2.67669	9.55876e-06	9.5253	4.52952	0.00261455	9.941	0.000608221	6.03878e-07	9.43876	11.147	6.3548	6.77725	3.1138	3.90335	1.21471e-05	0.990203	0.692547	1.19447
unknown	16.3507	16.3936	3.67223	7.05839	0.000118464	14.2513	10.8227	7.79756	13.0581	6.28272	7.71961	8.39656	8.42791e-06	2.75127	1.23224	6.24944	4.20631e-05	16.0019	9.7453	14.03	2.70037	3.15728	10.8949	4.3112	12.6843	16.8266	16.7854	4.33819	0.89316	0.699833	2.70685	2.28981	9.38998e-06	8.15061	3.87515	0.00274403	8.50676	0.000607092	0	8.05371	9.53869	5.44593	5.78291	2.6648	3.33954	1.63684e-05	0.847338	0.592639	1.02214
B_cell	22.3458	22.517	5.01721	9.64989	0.000135011	19.4724	14.7866	10.664	17.8588	8.58351	10.5475	11.4669	0	3.7574	1.68872	8.5387	4.20082e-06	21.8543	13.3111	19.1705	3.68943	4.31304	14.8913	5.88968	17.4768	23.0592	22.9589	5.92847	1.21951	0.955522	3.69925	3.13284	0.000322638	11.1381	5.2925	0.00333211	11.6254	0.000711144	0	11.0823	13.0561	7.43336	7.89702	3.64235	4.56786	0	1.15984	0.80974	1.39622
Malignant	26.4356	26.4307	5.93723	11.4103	0.000231146	23.0376	17.494	12.602	21.111	10.1565	12.4787	13.5751	8.44867e-07	4.44714	1.98995	10.1022	7.24947e-05	25.8736	15.7519	22.685	4.36631	5.10944	17.6252	6.96903	20.4738	27.2196	27.1619	7.01314	1.44519	1.13104	4.37471	3.70155	1.18571e-05	13.1769	6.26492	0.00386933	13.7515	0.00103925	0	13.0551	15.4236	8.79538	9.3692	4.3073	5.39934	6.74805e-05	1.37074	0.957999	1.65205
CAF	31.4725	31.4105	7.07279	13.5942	0.000227997	27.4449	20.8405	15.0016	25.1432	12.101	14.8663	16.1687	8.02324e-08	5.29789	2.36765	12.035	1.86174e-05	30.8325	18.7659	27.0265	5.19981	6.08013	20.9885	8.30216	24.3159	32.3563	32.23	8.35568	1.71998	1.34659	5.21211	4.40843	5.74821e-08	15.6993	7.45791	0.00503148	16.3818	0.00100233	8.75441e-07	15.5528	18.369	10.4846	11.1345	5.13079	6.42855	6.01123e-05	1.63181	1.1413	1.96787
Macro	19.6258	19.6919	4.41126	8.4783	0.000225455	17.12	13.002	9.37021	15.6808	7.54764	9.27435	10.0876	3.30033e-06	3.30472	1.47628	7.50814	3.02222e-05	19.218	11.7074	16.8609	3.24474	3.79696	13.0915	5.17868	15.2439	20.2067	20.1506	5.21223	1.07553	0.840059	3.25084	2.74909	1.09752e-05	9.79562	4.65558	0.00418526	10.2202	0.00060001	0	9.698	11.4548	6.54597	6.95278	3.20093	4.01053	4.36945e-05	1.01739	0.711998	1.22775
[truncated: 23 more columns]

## Sheet: GSE72056_Metabolic_Imbalance
	Pyruvate	Acetyl-CoA	Glutamate	2OG	Oxaloacetate	Glycine	Succinate	lysine	Aspartate	Glutathione	Arginine	Serine	Methionine	Ornithine	Tyrosine	Succinyl-CoA	Cysteine	B-Alanine	Propanoyl-CoA	Choline	G3P	Fumarate	Leucine	Putrescine	Histidine	Proline	Malate	Citrate	Valine	Threonine	3PD	Glucose	GABA	Isoleucine	G6P	Spermine	Fatty Acid	Pyrimidine
T_cell	-2.69224	-3.52982	2.62896	-9.10656	-0.329154	2.75766	-12.4533	1.21471e-05	9.36592	0.00967101	-0.578204	3.9773	0.0189708	0.0192253	0.000349125	-2.23728	-1.29401	-12.202	-0.506568	0.0051521	-0.010471	-1.43353	-0.0489783	-0.0168446	1.01626e-05	0.00498983	0.00815912	-3.53881	0.0252	0.00748903	3.95528	0.0965514	-0.990811	0.0383751	-0.0193719	-0.0093085	-0.0437586	0.00104626
unknown	-2.30562	-2.97566	2.25073	-7.79756	-0.28075	2.36067	-10.6505	1.63684e-05	8.01419	0.00723434	-0.497078	3.37796	0.0221979	0.019867	-0.000505786	-1.9265	-1.10868	-10.4404	-0.433315	0.00407658	-0.0371259	-1.22791	-0.0658435	-0.0143913	9.38998e-06	0.00258924	0.00744161	-3.02509	0.0213292	0.00534808	3.38616	0.0374879	-0.847945	0.0240589	0.042958	-0.00857386	-0.0413182	-0.000469141
B_cell	-3.15408	-4.09579	3.08297	-10.664	-0.37949	3.23223	-14.5678	0	10.9504	0.00447675	-0.68399	4.61975	0.0343493	0.0206057	0.00600315	-2.63067	-1.52026	-14.2713	-0.593852	0.0038204	-0.0229916	-1.67832	-0.0114599	-0.0175695	0.000322638	0.0095084	0.00461176	-4.12265	0.0522575	0.0060191	4.63268	0.0778157	-1.16056	0.0209899	0.171177	-0.00792668	-0.100393	-0.0048852
Malignant	-3.72858	-4.87682	3.63084	-12.602	-0.455848	3.81438	-17.2194	6.74805e-05	12.9557	0.0195442	-0.798167	5.45579	0.0498696	0.0307269	0.000130726	-3.108	-1.80232	-16.8785	-0.70024	0.00614891	-0.0196379	-1.98504	-0.0699891	-0.0222586	1.18571e-05	0.005032	0.0141443	-4.892	0.0388101	0.00907008	5.47303	0.0978009	-1.37177	0.0521088	-0.00487331	-0.0139765	-0.0577493	0.000555636
CAF	-4.43886	-5.72592	4.31618	-15.0016	-0.540377	4.54124	-20.5001	6.01123e-05	15.433	0.0315831	-0.952011	6.59934	0.0423863	0.0358889	-0.00440459	-3.71042	-2.13577	-20.1077	-0.839218	0.00735911	-0.0217322	-2.3655	-0.0856199	-0.0277141	9.32923e-07	0.00538744	0.0131224	-5.83889	0.0406338	0.0125166	6.52141	0.113396	-1.63282	0.041045	-0.0620855	-0.017965	-0.126353	-0.00337916
Macro	-2.76967	-3.59712	2.71029	-9.37021	-0.336423	2.83272	-12.7887	4.36945e-05	9.62917	0.00242846	-0.594444	4.10265	0.0275387	0.0242915	-0.00259176	-2.32005	-1.33119	-12.5447	-0.518916	0.00422892	-0.0367495	-1.47421	-0.0562305	-0.0178199	1.09752e-05	0.00243204	0.00893114	-3.63182	0.0206744	0.00636791	4.06703	0.0388386	-1.01799	0.0372645	0.066077	-0.0122683	-0.0561067	0.00248846

## Sheet: GSE103322_Metabolic_Flux
	M_1	M_2	M_3	M_4	M_5	M_6	M_7	M_8	M_10	M_11	M_12	M_13	M_17	M_18	M_21	M_22	M_23	M_24	M_25	M_26	M_28	M_29	M_30	M_31	M_32	M_33	M_34	M_35	M_36	M_37	M_38	M_40	M_42	M_44	M_45	M_46	M_47	M_48	M_53	M_54	M_55	M_56	M_57	M_58	M_59	M_60	M_61	M_62	M_63
T_cell	12.908	12.9608	2.32311	4.38289	0.000229851	8.19669	7.11513	7.10085	9.644	4.50311	5.33959	5.68377	1.55269e-07	1.66364	1.2202	1.44869	4.69257	6.41135e-08	12.9635	8.21658	7.88632	2.35013	2.05646	5.13634	3.01468	10.7131	13.2417	12.9905	3.39134	0.495274	0.65513	2.01678	2.24953	1.64707e-08	7.1356	3.00907	0.000172163	7.04666	4.12232	6.58085	3.96042	2.75269	1.71344	2.49567	0.980752	0.021432	0.522164	0.898856	1.48404
Mast	16.9208	17.0102	3.04456	5.79441	1.24769e-07	10.7602	9.34163	9.32181	12.6618	5.91182	7.01048	7.46237	0	2.17988	1.60227	1.88877	6.16099	0	17.0073	10.7836	10.3525	3.08366	2.66607	6.71667	3.94812	14.0259	21.3281	20.3633	4.45092	0.648507	0.870041	2.64721	2.9479	3.42046e-08	9.36399	3.93558	2.357e-06	9.25032	5.42512	8.64551	5.34139	3.86948	2.2497	3.25572	1.28765	0	0.685386	1.18013	1.94844
B_cell	10.6856	10.7091	1.92275	3.6307	2.99581e-05	6.77128	5.87866	5.86615	7.96807	3.72072	4.41167	4.69607	6.96786e-06	1.37588	1.00789	1.19	3.8771	1.14176e-09	10.6996	6.8006	6.51871	1.95856	1.70571	4.23907	2.49466	8.87364	15.2223	14.7363	2.80351	0.410343	0.542324	1.66689	1.85479	1.5238e-08	5.89886	2.48903	6.22229e-06	5.82369	3.51474	5.50115	3.184	2.16385	1.41657	2.05898	0.810317	0.0203014	0.43177	0.742653	1.22614
Fibroblast	16.8833	16.94	3.03877	5.7572	0.000211847	10.7132	9.29964	9.28106	12.6049	5.88571	6.97896	7.42884	1.65471e-06	2.17395	1.59477	1.88253	6.1333	8.15649e-08	16.9356	10.7403	10.3078	3.08633	2.67576	6.70205	3.94223	14.0067	22.3167	21.7204	4.43431	0.647218	0.854376	2.63869	2.93804	2.42616e-08	9.32701	3.93596	0.000168343	9.20954	5.44637	8.64685	5.13888	3.69304	2.24116	3.25448	1.28187	0.0188059	0.682547	1.17483	1.94043
Malignant	23.7948	23.8818	4.28323	8.10437	0.000291359	15.1037	13.1116	13.0818	17.7718	8.2984	9.83968	10.474	4.04868e-06	3.06558	2.24911	2.65603	8.64738	8.06189e-08	23.853	15.1449	14.535	4.35265	3.75269	9.44777	5.55723	19.7322	31.1658	29.951	6.25176	0.911843	1.20286	3.71942	4.1403	3.28212e-08	13.1519	5.5437	0.00028283	12.9848	7.51992	12.2391	7.14354	5.02463	3.15895	4.58602	1.80731	0.0146097	0.962421	1.65639	2.73527
myocyte	14.2234	14.2792	2.55782	4.86465	0.000221942	9.02834	7.83661	7.82078	10.6219	4.96069	5.88103	6.26018	8.63047e-07	1.83317	1.34406	1.58476	5.16841	5.34385e-09	14.2617	9.05044	8.68815	2.60849	2.25636	5.66925	3.32423	11.7888	18.8627	17.8461	3.73942	0.54571	0.722953	2.22216	2.47117	1.26154e-08	7.85794	3.30816	2.06721e-06	7.76049	4.68508	7.31694	4.16007	2.85352	1.88818	2.73755	1.0802	0.00427549	0.575252	0.990001	1.63451
Endothelial	19.378	19.4512	3.48156	6.55383	0.000193773	12.2999	10.6779	10.6495	14.4731	6.75756	8.01331	8.52987	9.62282e-06	2.49591	1.83177	2.15968	7.0423	2.29988e-07	19.4313	12.3271	11.8378	3.5328	3.07311	7.69805	4.52874	16.0561	28.3793	26.2507	5.08812	0.744948	0.978022	3.02707	3.37307	2.09378e-08	10.7048	4.51416	1.26586e-06	10.5743	6.232	9.93036	5.85857	4.05673	2.57261	3.73372	1.47185	0.0283855	0.78359	1.34894	2.22715
Macrophage	18.6238	18.6862	3.35024	6.33161	4.47524e-05	11.8145	10.256	10.2329	13.9012	6.49048	7.69664	8.19275	1.07311e-06	2.39645	1.75936	2.08294	6.76401	3.7584e-09	18.6765	11.8443	11.3676	3.38957	2.96291	7.39606	4.35319	15.4656	23.7403	23.2575	4.88918	0.712949	0.941416	2.9114	3.24104	2.25998e-08	10.2861	4.3372	1.24066e-05	10.1563	5.95134	9.55863	5.6305	4.28959	2.47153	3.58848	1.41368	0.00292246	0.752823	1.29564	2.13914
[truncated: 27 more columns]

## Sheet: GSE103322_Metabolic_Imbalance
	Pyruvate	Acetyl-CoA	Glutamate	2OG	Oxaloacetate	Glycine	Succinate	lysine	Aspartate	Glutathione	Arginine	Serine	Methionine	Ornithine	Phenylalanine	Tyrosine	Succinyl-CoA	Cysteine	B-Alanine	Propanoyl-CoA	Choline	G3P	Fumarate	Leucine	Putrescine	Proline	Malate	Citrate	Valine	Threonine	3PD	Glucose	Citrulline	GABA	Isoleucine	G6P	Spermine	Argininosuccinate	Fatty Acid	Pyrimidine
T_cell	-2.68167	0.469443	2.29966	-7.10085	-0.585429	1.59579	-8.14996	0.021432	5.86802	0.0543778	0.00178354	1.67161	0.0788375	0.011801	0.000986158	0.0131162	-0.897276	-0.109795	-9.38513	-0.00543936	-0.000438456	0.0753605	-0.87696	0.0613991	-0.00147584	-0.0144179	0.000647289	-0.0142791	-0.195147	0.00453375	2.05978	0.0042025	-0.0023437	-0.522164	-0.299918	0.0527949	0.00731956	-0.0031361	-0.251215	0.00401764
Mast	-3.55859	1.01181	3.0265	-9.32181	-0.767944	2.08762	-10.6856	0	7.71009	0.062683	0.0040126	2.19174	0.0413419	0.0219074	0.0012948	-0.0036086	-1.32507	-0.117691	-12.3119	-0.0125404	-0.0003477	0.0602437	-1.15103	0.091383	-0.00250224	-0.0273879	0.00518396	-0.019824	-0.250862	-0.0060282	2.74985	0.018111	-0.000984669	-0.685386	0.0032852	0.089436	0.0073731	-0.00410584	-0.964767	0.0041633
B_cell	-2.24594	0.665646	1.92438	-5.86615	-0.484297	1.31072	-6.73638	0.0203014	4.85255	0.021933	-0.00119718	1.3796	0.0638331	0.0205658	0.000814767	0.00875253	-0.717082	-0.0570258	-7.75365	-0.00562625	-0.000634026	0.0872915	-0.725611	0.158678	8.91685e-05	-0.0200305	-0.00159302	-0.0125053	-0.0973114	0.0074757	1.70795	0.0262526	-0.00226484	-0.43177	-0.446447	0.0235123	0.0016428	-0.00259046	-0.48592	0.0051522
Fibroblast	-3.5522	0.737324	3.01389	-9.28106	-0.767897	2.07554	-10.6552	0.0188059	7.67207	0.0619914	0.00377829	2.1834	0.0785227	0.0220009	0.00128893	0.011389	-1.1808	-0.114737	-12.265	-0.0061001	-0.000638598	0.105452	-1.14791	0.138889	-0.00145248	-0.022409	0.000127926	-0.0185802	-0.209528	0.00797627	2.71843	0.0239324	-0.00175613	-0.682547	-0.334269	0.0566709	0.00793085	-0.00409686	-0.5979	0.0035617
Malignant	-5.00202	1.76661	4.27604	-13.0818	-1.0818	2.92795	-15.0171	0.0146097	10.8134	0.0606517	0.00455387	3.08107	0.0867659	0.0268722	0.00181727	0.0127179	-1.61089	-0.111067	-17.2922	-0.0132434	-0.000404917	0.13358	-1.61767	0.0336098	-0.00186341	-0.0225784	-0.000622943	-0.0298052	-0.247551	0.00971116	3.82114	0.0139555	-0.00346479	-0.962421	-0.755293	0.0870682	0.00966836	-0.00577104	-1.21615	0.0073161
myocyte	-3.00089	1.31015	2.54911	-7.82078	-0.645725	1.74573	-8.96937	0.00427549	6.46972	0.042808	0.0025192	1.83735	0.0866704	0.0148788	0.00108615	0.00426309	-0.855119	-0.0740024	-10.3291	-0.0160659	-0.000354648	0.0673377	-0.967834	0.211152	-0.00156773	-0.0273478	-0.00142891	-0.0158285	-0.146152	0.00847194	2.30684	-0.013712	-0.000810007	-0.575252	-0.710558	0.0558283	0.003136	-0.00346037	-1.02632	-0.00040802
Endothelial	-4.00676	2.48923	3.46991	-10.6495	-0.879014	2.38247	-12.2297	0.0283855	8.80188	0.0619718	0.00220018	2.51341	0.0893843	0.0263739	0.00147998	0.00926285	-1.31586	-0.120774	-14.0779	-0.0145792	-8.69e-05	0.086494	-1.31686	0.140304	-0.0021911	-0.0314486	0.00273629	-0.0284279	-0.2386	0.0116567	3.07227	0.047786	-0.00300253	-0.78359	-0.60939	0.073162	0.0110869	-0.00470048	-2.12861	0.00491873
Macrophage	-3.88436	0.494917	3.32178	-10.2329	-0.8482	2.29664	-11.7479	0.00292246	8.45962	0.0682305	0.00194207	2.41119	0.103611	0.0150724	0.00142147	0.0117819	-1.28797	-0.141156	-13.5272	-0.0159819	-0.000108185	0.129668	-1.26537	0.0970888	-0.00129473	-0.0166521	0.000208899	-0.0230214	-0.208487	0.0143647	2.98137	0.0227071	-0.00212511	-0.752823	-0.188692	0.0624325	0.00939206	-0.00451352	-0.482873	0.00063438
